# Supplementary material for: How do Neurotransmitter Pathways contribute to Neuroimaging Phenotypes?
Source: Research Square preprint supplement (doi:10.21203/rs.3.rs-4206011/v1), 2024-07-23
Supplement: Supplementary file 1 [file 146ccb225152555a04998575.xlsx]

## Sheet: Neurotransmitters
Acetylcholine	GABA	Glutamate	Aspartate	Glycine	Dopamine	Epinephrine	Norepinephrine	Serotonin	Histamine
CHAT	ABAT	GCLM	ASS1	GCSH	TOMT	PNMT	KL	SRD5A1	SLC29A4
BCHE	ALDH5A1	GAD2	DDO	GLDC	ABAT	TH	EPAS1	TPH1	HDC
ACHE	SLC1A3	AADAT	ASPA	AGXT	DRD4	ATP7A	LY6E	PDE1B	HNMT
SLC44A4	PHGDH	DGLUCY	ADSS2	AMT	ITGAM	ADRA2B	DBH	GRIN2A	SLC22A3
SLC5A7	ALDH1A1	FPGS	BLOC1S6	SHMT2	DBH	SLC29A4	INSM1	BTBD9	PRG3
COLQ	P2RX7	GAD1	GOT1	DHFR2	TACR3	CRH	PRKN	HTR1A	TRH
TACR2	NF1	SLC25A12	GOT1L1	AGXT2	CHRNB2	VIP	MOXD1	RNF180	VAMP3
ADORA2A	ABAT	MTHFS	ABAT	SHMT1	PDE1B	CARTPT	GATA3	TPH2	SLC29A4
CHRNA3	HTR1B	SLC7A11	SLC12A2	GLYAT	PRKN	LY6E	MOXD2P	DDC	VAMP7
CHRFAM7A	SLC6A6	GGT1	SLC1A5	PHGDH	DAO	ADRA2C	EDNRA	ATP7A	LYN
CHRNB3	SV2A	ALDH18A1	SLC1A6	RIDA	NPY	SLC22A1	HAND2	ALDH2	SNX6
CHRNA7	TRPC4	AMDHD1	SLC25A12	DHFR	NPR1	ADRA2A	RNF180	SLC29A4	VAMP8
CHRND	SLC32A1	UROC1	SLC25A13	GCAT	MOXD1	SLC22A3	RTL4	SLC18A2	SNAP23
CHRNB1	SLC6A13	PRODH	SLC25A18	GART	COMT	ADRA2B	TH	CNR1	VAMP2
CHRNB2	SLC6A11	ATCAY	SLC25A22	BAAT	DRD1	DRD4	ATP7A	HTR1B	CSF2
CHRNA4	SLC6A12	ALDH5A1	SLC1A4	SLC36A1	NR4A2	RNLS	OXT	SYK	SLC22A2
CHRNA1	APBA1	NAGS	SLC1A1	SLC25A38	PARK7	A0A3B3IT50	GHSR	HRH3	PLA2G3
CHRM3	SLC9A3R1	ADHFE1	SLC1A2	SLC38A5	TGFB2	ADRA2C	ADRA2B	NOS1	SLC22A3
	GABBR1	GLS	SLC1A3	SLC6A17	PNKD	ADRB3	SLC29A4	SLC18A1	EDN1
	SLC6A1	GLUL	SLC38A7	SLC6A20	SLC1A1	ADRA2A	AGT	P2RX1	SNX4
	NTSR1	ALDH4A1	CAD	SLC32A1	MAOA		HRH3	SLC6A4	BTK
	TRH	OAT		RGS4	GRIN2A		ADORA2A	ITGB3
	ARFGEF2	NR1H4		RGS2	DRD3		ADORA3	SLC22A1
	GABRB1	BLOC1S6		SLC6A9	MOXD2P		STX1A	HTR1A
	PLCL1	HAL		SLC36A3	A0A2R8Y5M8		FFAR3	GPM6B
	GABRG1	GOT1		SLC36A2	HTR1A		SLC6A2	SLC22A2
	TRAK1	GLUD1		SLC6A5	VPS35		ADRA2C	SLC22A3
	PLCL2	FTCD		SLC7A8	SLC6A3		SLC22A1	SNCA
	JAKMIP1	GLS2		GLRA2	GPR37		ADRA2A	MAOB
	GABRA5	TAT		GLRA1	DRD2		SLC22A2	LILRB1
	GABARAPL3	PRODH2		GLDC	SNCAIP		SLC6A3	HTR2C
	SHISA7	GLUD2		GRIN1	DDC		ACTB	HTR2A
	GABARAPL2	GOT2		GRIN3B	HPRT1		SLC22A3	HTR1D
	LHFPL4	TRPV1		GRIN3A	TH		OXTR	HTR1E
	TRAK2	P2RX7		GLRB	SNCA		KCNB1	HTR4
	AKAP5	NF1		SRR	GCH1		P2RY1	SLC6A4
	GABARAPL1	AVP		GRIN2B	SULT1A3		SNCA	HTR3A
	GABARAP	NPY5R		GLRA3	MAOB		DRD4	HTR1F
	PPP2CA	HRH3		CEP104	CHRNA6		ADRB2	HTR5A
		ADORA2A		GNMT	ABAT		A0A3B3IT50	HTR2B
		NTRK2			DRD4		ADRB3
		SYT4			SLC29A4
		STXBP1			SLC18A2
		RAB3GAP1			KCNA2
		GIPC1			SYT13
		APBA1			SYT1
		KMO			CNR1
		GABBR1			HTR2A
		AVPR1A			HTR1B
		ADORA1			SNCG
		GRM2			GDNF
		AVPR1B			SYT15
		NTSR1			SYT3
		SNCA			CHRNB2
		DTNBP1			SYT4
		GJA1			PRKN
		GRM7			SYT5
		TRH			MAPK15
		GCLC			DRD1
		GAD2			PARK7
		GRIN1			CXCL12
		CPS1			CHRNA4
		SLC1A1			OPRK1
		SLC1A3			SYT12
		GLUL			DRD3
		GRIN2D			SYT2
		GRIN2B			SLC6A2
		CEP104			SLC22A1
		KCNJ10			CHRM5
		ATP1A2			TOR1A
		PER2			SLC22A2
		ITGB1			SLC6A3
		CLN8			SYT11
					SYT17
					SYT9
					PINK1
					SYT6
					DRD2
					SLC22A3
					GABBR1
					SYT8
					GRM2
					SYT10
					SNCA
					DTNBP1
					SYT7
					RAB3B
					RAB3A
					FGF20
					DRD5
					GPR143

## Sheet: Tissue_decoding
FDR-corrected p-value
	Acetylcholine	Aspartate	Dopamine	Epinephrine	GABA	Glutamate	Glycine	Histamine	Norepinephrine	Serotonin
Adipose_Subcutaneous	1	1	1	1	1	1	1	0.581517	1	1
Adipose_Visceral_Omentum	1	1	1	1	1	1	1	1	1	1
Adrenal_Gland	1	1	1	1	1	1	1	1	1	1
Artery_Aorta	1	1	1	1	1	1	1	1	1	1
Artery_Coronary	1	1	1	1	1	1	1	1	1	1
Artery_Tibial	1	1	1	1	1	1	1	1	1	0.949353
Bladder	1	1	1	1	1	1	1	1	1	1
Brain_Amygdala	1	0.032973	1.91e-08	1	7.77e-11	2.04e-07	0.006759	1	1	1
Brain_Anterior_cingulate_cortex_BA24	1	0.027515	5.14e-14	1	6.49e-07	1.24e-06	0.015847	1	1	0.00643
Brain_Caudate_basal_ganglia	1	0.00022	3.69e-11	1	1.74e-09	3.57e-08	1	1	0.40568	0.002498
Brain_Cerebellar_Hemisphere	1	1	0.203242	1	0.028394	1	1	1	1	1
Brain_Cerebellum	1	1	0.008188	1	0.015214	0.151253	1	1	1	1
Brain_Cortex	1	0.074107	6.12e-12	1	1.26e-07	1.2e-06	0.060821	1	1	0.100006
Brain_Frontal_Cortex_BA9	1	0.156011	2.19e-13	1	6.16e-06	5.1e-05	0.048437	1	1	0.023794
Brain_Hippocampus	1	0.280361	8.89e-08	1	2.82e-10	1.85e-05	0.71893	1	1	0.304629
Brain_Hypothalamus	1	0.006531	1.08e-15	1	2.21e-07	4.05e-06	0.103777	1	0.103777	0.046188
Brain_Nucleus_accumbens_basal_ganglia	1	0.003577	8.46e-12	1	6.73e-10	5.86e-09	0.649639	1	0.055417	0.001143
Brain_Putamen_basal_ganglia	0.464	0.002801	1.76e-11	1	3.31e-09	5.72e-08	0.327109	1	0.327109	0.006239
Brain_Spinal_cord_cervical_c-1	1	0.010204	0.22187	1	6.53e-08	0.082079	1	1	1	1
Brain_Substantia_nigra	1	0.598674	7.88e-14	1	8.51e-12	7.41e-07	0.002308	1	0.853981	1
Breast_Mammary_Tissue	1	1	1	1	1	1	1	1	1	1
Cells_Cultured_fibroblasts	1	1	1	1	1	1	1	1	1	1
Cells_EBV-transformed_lymphocytes	1	1	1	1	1	1	1	1	1	1
Cervix_Ectocervix	1	1	1	1	1	1	1	1	1	1
Cervix_Endocervix	1	1	1	1	1	1	1	1	1	1
Colon_Sigmoid	0.357716	1	1	1	1	1	1	1	0.814257	0.312989
Colon_Transverse	0.031024	1	1	1	1	1	1	1	1	1
Esophagus_Gastroesophageal_Junction	0.865517	1	1	1	1	1	1	1	1	1
Esophagus_Mucosa	1	1	1	1	1	1	1	1	1	1
Esophagus_Muscularis	0.954236	1	1	1	1	1	1	1	1	1
Fallopian_Tube	1	1	1	1	1	1	1	1	1	1
Heart_Atrial_Appendage	1	1	1	1	1	1	1	1	1	1
Heart_Left_Ventricle	1	1	1	1	1	1	1	1	1	1
Kidney_Cortex	1	1	1	1	1	0.073595	0.006967	1	1	1
Kidney_Medulla	1	1	1	1	1	1	1	1	1	1
Liver	1	0.316259	0.038277	1	1	4.84e-08	0.003454	1	1	1
Lung	1	1	1	1	1	1	1	0.912778	1	1
Minor_Salivary_Gland	1	1	1	1	1	1	1	1	1	1
Muscle_Skeletal	0.526264	1	1	1	1	1	1	1	1	1
Nerve_Tibial	1	1	1	1	1	1	1	1	1	1
Ovary	1	1	1	1	1	1	1	1	1	1
Pancreas	1	1	1	1	1	1	1	1	1	1
Pituitary	1	1	0.009888	1	1	1	1	1	1	1
Prostate	1	1	1	1	1	1	1	1	1	1
Skin_Not_Sun_Exposed_Suprapubic	1	1	1	1	1	1	1	1	1	1
Skin_Sun_Exposed_Lower_leg	1	1	1	1	1	1	1	1	1	1
Small_Intestine_Terminal_Ileum	1	1	1	1	1	1	1	1	1	0.106659
Spleen	1	1	1	1	1	1	1	1	1	1
Stomach	0.356389	1	1	1	1	1	1	1	1	1
Testis	1	1	1	1	1	1	1	1	1	1
Thyroid	1	1	1	1	1	1	1	1	1	1
Uterus	1	1	1	1	1	1	1	1	1	1
Vagina	1	1	1	1	1	1	1	1	1	1
Whole_Blood	1	1	1	1	1	1	1	1	1	1

## Sheet: Developmental_decoding
FDR-corrected p-value (Cortex)
	Acetylcholine	GABA	Glutamate	Aspartate	Glycine	Dopamine	Epinephrine	Norepinephrine	Serotonin	Histamine
Adolescence	0.905	1	0.144	1	0.157	0.015	0.904	0.287	0.02	1
EarlyChildhood	0.862	0.913	0.71	0.88	0.197	0.532	0.904	0.137	0.431	1
EarlyFetal	1	1	1	1	1	0.908	1	1	1	1
EarlyMidFetal	1	0.908	0.523	1	0.693	0.362	0.914	0.964	0.528	1
LateFetal	1	0.908	0.088	1	0.808	0.008	0.904	0.57	1	1
LateInfancy	1	1	1	0.88	0.741	1	0.904	0.766	1	1
LateMidFetal	1	1	0.549	1	0.851	1	0.904	0.876	1	1
MiddleLateChildhood	1	1	0.85	0.454	0.566	0.364	0.904	0.766	0.046	1
NeotalEarlyInfancy	0.905	0.477	0.116	1	0.157	0.011	0.048	0.493	0.206	1
YoungAdulthood	0.905	0.908	0.031	0.979	0.157	0.048	0.908	0.407	0.014	1
FDR-corrected p-value (Cerebellum)
Adolescence	0.812	1	1	0.979	0.421	0.109	1	1	1	1
EarlyChildhood	1	0.972	1	0.979	0.597	0.15	1	0.766	1	1
EarlyFetal	1	1	1	0.979	0.741	1	1	0.766	1	1
EarlyMidFetal	0.812	1	1	0.88	0.618	1	0.993	0.57	0.69	1
LateFetal	0.67	0.908	1	0.288	0.693	0.06	0.914	0.686	1	1
LateInfancy	1	1	0.893	0.979	0.254	0.375	1	1	1	1
LateMidFetal	0.905	1	1	0.622	0.808	1	1	0.686	1	1
MiddleLateChildhood	1	0.908	0.699	0.88	0.443	0.126	1	1	1	1
NeotalEarlyInfancy	0.943	1	0.893	0.979	0.693	0.163	0.611	0.473	0.884	1
YoungAdulthood	0.321	1	1	0.979	0.421	0.109	1	1	1	1
FDR-corrected p-value (Amygdala)
Adolescence	1	0.908	0.144	0.201	0.794	0.005	0.904	0.521	0.02	1
EarlyChildhood	1	1	1	1	1	0.122	1	1	0.731	1
EarlyFetal	1	1	1	0.979	1	1	1	0.804	1	1
EarlyMidFetal	1	1	1	0.979	0.939	0.57	0.914	0.493	1	1
LateFetal	1	1	0.774	0.672	1	0.589	1	0.151	1	0.654
LateInfancy	1	1	1	0.979	0.254	1	1	0.686	1	1
LateMidFetal	0.905	0.908	1	1	0.443	0.634	1	1	1	1
MiddleLateChildhood	0.812	1	1	1	1	0.169	1	0.287	0.002	1
NeotalEarlyInfancy	1	0.908	0.735	1	0.72	0.012	0.038	0.766	1	1
YoungAdulthood	1	1	0.035	0.454	0.741	0.362	1	0.766	1	1
FDR-corrected p-value (Hippocampus)
Adolescence	0.905	0.908	0.523	0.232	1	0.362	0.904	0.142	0.114	1
EarlyChildhood	0.905	1	1	0.622	0.618	1	0.904	0.84	1	1
EarlyFetal	1	1	1	0.88	1	1	1	1	1	1
EarlyMidFetal	0.905	1	1	1	1	0.558	1	1	1	1
LateFetal	0.905	1	0.699	0.947	0.618	0.321	1	0.287	1	1
LateInfancy	1	1	1	0.756	0.693	1	1	1	1	0.776
LateMidFetal	1	0.908	1	1	0.646	0.362	1	0.876	1	1
MiddleLateChildhood	0.905	0.908	1	0.88	0.254	0.362	0.904	0.766	0.043	1
NeotalEarlyInfancy	1	0.373	0.088	0.88	0.532	0.589	0.232	0.473	1	1
YoungAdulthood	0.905	1	0.047	0.907	0.597	0.401	0.904	0.493	0.206	1
FDR-corrected p-value (Striatum)
Adolescence	0.321	0.073	0.016	0.201	0.741	0.004	0.237	0.033	0.002	1
EarlyChildhood	0.111	0.908	0.348	0.907	0.597	0.012	0.031	0.008	0.001	1
EarlyFetal	1	1	1	0.907	1	1	1	0.762	1	1
EarlyMidFetal	0.905	0.826	1	1	0.646	0.035	0.904	0.365	1	1
LateFetal	0.751	0.908	1	0.763	0.693	0.004	0.186	0.016	0.09	1
LateInfancy	1	1	1	1	0.88	0.935	1	1	1	1
LateMidFetal	1	0.908	0.893	1	0.693	0.004	0.914	0.223	0.884	1
MiddleLateChildhood	0.751	0.908	0.031	0.979	0.693	0.014	0.186	0.112	0.007	1
NeotalEarlyInfancy	0.168	0.908	0.523	0.979	0.646	0.001	0.036	0.007	0.002	1
YoungAdulthood	0.292	0.083	0.144	0.201	0.939	0.004	0.047	0.066	0.006	1

## Sheet: Neuropsychological_decoding
Spearman Correlation
	Acetylcholine	GABA	Glutamate	Aspartate	Glycine	Dopamine	Epinephrine	Norepinephrine	Serotonin	Histamine
action	-0.25561	-0.05638	-0.00565	-0.02338	0.337204	-0.14316	-0.11597	-0.34118	-0.3479	-0.51963
adaptation	-0.31673	-0.30115	-0.2217	-0.14652	-0.0738	-0.29901	-0.13155	-0.27914	-0.33231	-0.32254
addiction	0.292284	0.324064	0.32162	0.386707	-0.06769	0.23728	-0.08358	0.381207	0.289534	0.409931
anticipation	0.080825	0.243392	0.357678	0.414209	0.220474	0.071963	-0.37418	0.097326	0.016654	0.125745
anxiety	0.346982	0.355539	0.255004	0.474714	-0.29748	0.296868	0.002292	0.513216	0.40657	0.559053
arousal	0.391597	0.272116	0.309702	0.349121	-0.17494	0.396486	0.153247	0.560886	0.50191	0.620779
association	0.244309	0.10466	0.03835	0.232086	-0.23545	0.177998	-0.12116	0.255309	0.150802	0.292284
attention	-0.51108	-0.19939	-0.01115	-0.21345	0.56822	-0.40596	-0.48571	-0.50222	-0.51994	-0.64828
autobiographical_memory	0.063713	-0.05455	-0.13766	0.033155	-0.37876	0.039878	0.225057	0.292284	0.315508	0.339037
balance	0.252559	0.314286	0.275172	0.281895	-0.00199	0.274561	0.093354	0.087242	0.153247	0.252254
belief	-0.28923	-0.08571	0.009015	0.047212	-0.24492	-0.05943	0.322536	0.089076	0.076853	0.027349
categorization	-0.4139	-0.28831	-0.29473	-0.55264	0.238808	-0.4304	-0.29167	-0.56058	-0.41176	-0.57892
cognitive_control	0.189916	0.279144	0.237892	0.222613	-0.01482	0.214057	0.230252	0.321008	0.299924	0.152024
communication	0.108021	0.035294	0.077769	-0.14316	-0.23331	0.208556	0.566387	0.183499	0.365623	0.087853
competition	-0.29045	-0.36501	0.009931	-0.20489	0.041711	-0.17311	0.225668	-0.16975	-0.13705	-0.28067
concept	0.12605	-0.01176	-0.08358	0.177998	-0.44935	0.159053	0.239419	0.199389	0.213445	0.23728
consciousness	-0.1838	0.0466	-0.0304	-0.1288	0.166998	-0.3534	-0.51994	-0.28312	-0.2495	-0.30604
consolidation	0.174026	0.197555	0.112299	0.069213	-0.2217	0.250726	0.171581	0.183499	0.325286	0.038044
context	0.486937	0.155386	0.150191	0.059435	-0.14714	0.386707	0.426738	0.29534	0.403514	0.266921
coordination	-0.01727	0.132468	0.082964	-0.06585	0.568526	0.010542	-0.44843	-0.37785	-0.33079	-0.40932
decision	0.13644	0.060963	0.182888	0.114133	0.038655	0.223224	0.347899	0.249198	0.2767	0.106799
decision_making	-0.01879	0.125439	0.288617	0.304507	0.123911	0.048128	-0.01299	0.171581	0.08602	0.178304
detection	-0.33323	-0.04171	0.009931	-0.08846	0.206112	-0.29167	-0.28923	-0.27701	-0.3204	-0.18411
discrimination	-0.39832	-0.3094	-0.31887	-0.37448	0.21314	-0.42827	-0.38151	-0.51322	-0.43774	-0.40199
distraction	0.065241	0.14958	0.185332	0.273033	-0.10619	0.193277	0.122078	0.276089	0.254698	0.317341
eating	0.30848	0.091215	0.18961	0.315508	-0.29045	0.177387	-0.00015	0.378457	0.27395	0.447517
efficiency	-0.19206	0.01482	0.018487	0.073186	0.118717	-0.10985	-0.12086	-0.12483	-0.14989	-0.16364
effort	-0.08908	0.14194	-0.04293	-0.32223	0.440183	0.053629	-0.0958	-0.233	-0.14683	-0.38304
emotion	0.454851	0.325286	0.329259	0.475936	-0.4084	0.482659	0.400764	0.681589	0.607334	0.801681
emotion_regulation	0.315508	0.327731	0.195111	0.403514	-0.29778	0.385791	0.408098	0.598167	0.52605	0.595111
empathy	0.203667	0.439572	0.225974	0.178304	-0.07563	0.312452	0.357983	0.381513	0.415737	0.31398
encoding	0.066769	-0.20367	-0.3696	-0.38701	-0.19908	0.02796	0.226585	0.100076	0.173415	-0.03377
episodic_memory	0.019099	-0.156	-0.38151	-0.24156	-0.29228	-0.03835	0.169137	0.128801	0.110772	0.049962
expectancy	-0.26509	-0.07471	-0.11597	0.044461	0.113522	-0.20183	-0.11474	-0.06494	-0.19328	-0.07135
expertise	-0.15386	-0.16975	0.021849	0.024599	0.146524	0.002292	0.066769	-0.20092	-0.15264	-0.29045
extinction	0.198167	0.048434	0.307563	0.29809	-0.09488	0.220779	0.02521	0.433461	0.306646	0.530634
face_recognition	-0.07746	-0.16058	-0.14927	0.042017	-0.43407	-0.11627	0.125439	0.125439	0.11505	0.177387
facial_expression	0.005042	-0.05577	0.104354	0.177387	-0.23147	0.073491	0.183193	0.133079	0.226585	0.086937
familiarity	0.170053	0.020932	-0.16211	-0.18044	-0.16853	0.180138	0.272727	0.229335	0.326814	0.084186
fear	0.448739	0.275783	0.325286	0.473186	-0.43682	0.356761	0.2767	0.648587	0.574637	0.68984
fixation	-0.56211	-0.48816	-0.37082	-0.46371	0.335065	-0.52727	-0.46157	-0.59511	-0.59419	-0.65286
focus	-0.37846	-0.05668	-0.00993	-0.22781	0.327731	-0.23636	-0.29992	-0.30053	-0.22903	-0.28648
gaze	-0.40657	-0.38976	-0.12941	-0.25286	0.355539	-0.30084	-0.21803	-0.5016	-0.46157	-0.62659
goal	-0.20489	0.052712	0.068296	0.1178	0.154775	-0.22078	-0.1398	-0.15508	-0.2437	-0.19572
hyperactivity	0.285867	0.350344	0.315814	0.546524	-0.18686	0.312147	0.046906	0.496409	0.270588	0.52605
imagery	-0.23759	-0.13613	-0.13522	-0.28709	0.551413	-0.26662	-0.52422	-0.52116	-0.48327	-0.59817
impulsivity	0.208556	0.188999	0.235752	0.444461	-0.10252	0.165775	-0.06096	0.339037	0.221696	0.418793
induction	0.130328	0.28984	0.236058	0.37204	0.077158	0.107716	-0.38671	0.00107	-0.02429	0.218029
inference	-0.12636	-0.09855	-0.17953	-0.03682	-0.06494	0.012376	0.087242	-0.07166	-0.02277	0.035905
inhibition	0.154163	0.273338	0.272422	0.393736	0.274561	0.140107	-0.15783	0.090604	-0.03285	0.052406
insight	0.220474	0.219251	-0.10222	0.148969	-0.27028	0.06249	-0.23789	0.189916	0.136134	0.279144
integration	-0.13705	-0.14561	-0.31154	-0.46157	-0.02399	-0.14163	0.047212	-0.2385	-0.12055	-0.32009
intelligence	-0.22261	-0.29351	0.016043	0.04385	-0.08602	-0.04232	0.346066	-0.03377	-0.11016	-0.17555
intention	-0.39221	-0.25561	-0.09519	0.075325	-0.20275	-0.23759	0.321008	-0.04385	-0.07013	-0.01543
interference	-0.04416	-0.06035	0.147441	0.207028	0.190527	-0.09824	-0.05455	-0.0848	-0.1395	-0.12972
judgment	-0.10038	-0.24217	-0.23086	-0.27853	-0.19878	-0.00351	0.426432	0.026432	0.14958	-0.10313
knowledge	0.103438	-0.01696	-0.12177	-0.09672	-0.50008	0.196944	0.68984	0.285867	0.4411	0.129412
language	-0.09916	-0.31642	-0.2055	-0.32926	-0.02949	0.013904	0.379985	-0.07319	0.009626	-0.17769
language_comprehension	0.106799	-0.18686	-0.13338	-0.15355	-0.13125	0.171276	0.387624	0.061574	0.153247	0.019099
learning	0.044767	-0.15233	0.036822	0.141635	0.242781	-0.02827	-0.37448	-0.00199	-0.08816	0.100993
listening	0.068296	0.14194	0.03285	-0.02338	-0.12941	0.22628	0.349121	0.076241	0.148969	0.119633
localization	-0.3314	-0.18014	-0.22475	-0.14744	-0.06799	-0.39343	-0.1728	-0.26203	-0.3754	-0.11016
loss	0.356761	0.328953	0.28495	0.42796	-0.37173	0.267532	0.007792	0.456684	0.398625	0.58411
maintenance	-0.16394	-0.06952	-0.09183	-0.27334	0.429183	-0.17158	-0.23178	-0.17066	-0.17158	-0.28312
manipulation	-0.27028	-0.05271	-0.16455	-0.36654	0.350038	-0.19878	-0.18503	-0.35921	-0.24706	-0.58869
meaning	-0.24034	-0.4194	-0.18686	-0.40138	0.05424	-0.12055	0.207639	-0.26356	-0.12116	-0.34332
memory	0.134912	-0.02857	-0.27059	-0.22322	-0.17189	0.108938	0.240947	0.196944	0.212834	0.035294
memory_retrieval	0.221085	0.147441	-0.06402	0.104354	-0.38304	0.203667	0.379679	0.445989	0.408709	0.392208
mental_imagery	-0.19175	-0.17341	-0.37785	-0.41329	0.095187	-0.26264	-0.244	-0.25134	-0.23514	-0.45149
monitoring	-0.18594	0.087242	0.138273	0.049656	0.381513	-0.134	-0.22383	-0.13613	-0.16425	-0.24309
mood	0.36929	0.132162	0.054545	0.32712	-0.42277	0.262338	0.235447	0.486937	0.416654	0.538579
morphology	0.408709	0.205195	0.240642	0.437433	-0.38579	0.383346	0.361345	0.463407	0.420932	0.621085
motor_control	-0.06463	0.104354	0.116883	0.108633	0.453018	-0.0026	-0.40504	-0.21895	-0.27334	-0.20275
movement	-0.26784	-0.07471	0.016043	-0.07899	0.624446	-0.17953	-0.50344	-0.4573	-0.49855	-0.4683
multisensory	-0.4136	-0.2055	-0.06952	-0.32131	0.321925	-0.34912	-0.3589	-0.53033	-0.44477	-0.51719
naming	-0.15019	-0.2715	-0.16089	-0.35218	0.053934	-0.16883	0.166081	-0.21742	-0.15844	-0.31612
navigation	-0.14347	-0.14927	-0.31581	-0.33659	0.182888	-0.19481	-0.32376	-0.23422	-0.2492	-0.32651
object_recognition	-0.40596	-0.4194	-0.37357	-0.28678	-0.08969	-0.39312	-0.20336	-0.36501	-0.36593	-0.3916
pain	0.388541	0.585332	0.400458	0.513216	0.067074	0.330176	-0.16975	0.313675	0.255309	0.419404
perception	-0.30848	-0.15875	0.00657	-0.24981	0.280672	-0.2605	-0.32162	-0.40474	-0.30328	-0.39037
planning	-0.2495	-0.13613	-0.1285	0.026738	0.335065	-0.20061	-0.26234	-0.33934	-0.46616	-0.42643
priming	-0.12911	-0.48449	-0.31337	-0.33812	-0.11108	-0.13827	0.189305	-0.1783	-0.11322	-0.21253
psychosis	-0.11566	0.000764	-0.05455	0.021543	-0.04629	-0.01115	0.065852	0.050267	0.014209	0.0411
reading	-0.25164	-0.38396	-0.22475	-0.39679	0.12055	-0.12605	0.185027	-0.30115	-0.18044	-0.47532
reasoning	-0.23178	-0.24584	-0.20764	-0.10497	-0.00718	-0.13186	0.166998	-0.01604	-0.06341	-0.06402
recall	0.175859	0.023988	-0.14225	-0.24767	-0.09916	0.229335	0.273033	0.186249	0.296562	0.221696
recognition	-0.06677	-0.17403	-0.30451	-0.37968	-0.20275	-0.05118	0.209473	-0.06096	0.119328	-0.18105
rehearsal	-0.14989	-0.18747	-0.15661	-0.39557	0.30573	-0.13888	-0.06769	-0.24156	-0.20733	-0.35004
reinforcement_learning	-0.01727	-0.07624	0.083575	0.010237	0.28984	0.012987	-0.17769	0.002903	-0.00535	-0.13858
response_inhibition	0.047517	0.256532	0.383652	0.352788	0.418487	0.128189	-0.17036	0.053018	-0.00474	-0.05882
response_selection	0.16272	0.262949	0.427655	0.376318	0.355539	0.251031	0.022765	0.143774	0.004431	-0.05699
retention	-0.02552	0.01207	-0.04324	0.049045	0.144079	-0.0631	-0.24034	-0.22322	-0.19206	-0.26264
retrieval	0.065546	-0.04782	-0.22995	-0.25959	-0.23881	0.089992	0.368373	0.168831	0.26906	0.017876
reward_anticipation	0.170665	0.143468	0.289228	0.294729	0.100993	0.174332	-0.19083	0.224141	0.190833	0.123606
rhythm	-0.02368	0.031933	0.185943	0.021849	0.241253	0.078992	-0.0521	-0.26356	-0.16425	-0.23545
risk	0.174637	0.10466	0.163331	0.388846	-0.39037	0.134607	0.216501	0.426127	0.283728	0.496715
rule	-0.16486	-0.22047	-0.09366	-0.02949	0.185638	-0.11811	0.078992	-0.07716	-0.09702	-0.14714
salience	0.147135	0.189305	0.058212	0.140718	-0.22811	0.051184	-0.0191	0.371734	0.265699	0.410848
search	-0.35157	-0.47319	-0.33843	-0.53705	0.119939	-0.32651	-0.01421	-0.33934	-0.24003	-0.5285
selective_attention	-0.70817	-0.589	-0.22903	-0.2	0.253782	-0.62108	-0.36226	-0.50802	-0.61895	-0.36532
semantic_memory	0.382124	0.152636	-0.10802	-0.05332	-0.5453	0.333537	0.556608	0.464935	0.538885	0.346066
sentence_comprehension	-0.22597	-0.26295	-0.09183	-0.31673	0.1233	-0.04996	0.26356	-0.21253	-0.05393	-0.29442
skill	-0.21192	0.017571	-0.00321	-0.0796	0.457601	-0.03254	-0.14927	-0.36715	-0.31367	-0.633
sleep	0.149274	0.178304	0.139496	0.206112	-0.19603	0.057296	-0.24889	0.24492	0.185027	0.452406
social_cognition	-0.22811	-0.1288	0.045684	0.083575	-0.30084	-0.08113	0.266921	0.074408	0.129412	0.048739
spatial_attention	-0.53583	-0.30481	-0.20947	-0.15386	0.357983	-0.4851	-0.45791	-0.50222	-0.6272	-0.56394
speech_perception	-0.26173	-0.27823	-0.1398	-0.1343	0.088464	-0.08358	0.100993	-0.211	-0.10344	-0.0521
speech_production	-0.07044	-0.01054	-0.06402	-0.15508	0.229641	0.019404	-0.08021	-0.19022	-0.14652	-0.18594
strategy	-0.12972	-0.17739	-0.38732	-0.32834	-0.06096	-0.11597	0.128801	0.007792	0.037433	-0.00138
strength	-0.02032	0.169442	0.10466	0.313369	-0.31276	-0.03071	0.154775	0.064324	0.035294	0.124828
stress	0.486631	0.399542	0.308785	0.45699	-0.38304	0.429183	0.211612	0.630252	0.525134	0.604278
sustained_attention	0.138273	0.095798	-0.09305	0.028266	0.115966	0.033461	-0.45882	-0.00657	-0.15477	0.149274
task_difficulty	0.070741	-0.00504	-0.0903	-0.08755	0.255615	0.023682	-0.17372	-0.01238	-0.04018	-0.11413
thought	0.2822	0.200306	0.026738	0.092131	-0.22047	0.312147	0.415126	0.324675	0.321925	0.116883
uncertainty	-0.21742	0.010848	0.151108	0.099465	0.112605	-0.21589	-0.16578	0.010542	-0.04935	0.01971
updating	-0.22628	-0.19144	-0.27853	-0.23392	0.305118	-0.27273	-0.22842	-0.15141	-0.25103	-0.27762
utility	0.009015	0.249198	0.380901	0.222002	0.009015	0.128189	0.071963	0.132468	0.131551	0.194194
valence	0.358594	0.22903	0.150191	0.157525	-0.33354	0.416043	0.402292	0.563942	0.607028	0.474408
verbal_fluency	-0.03591	0.048739	0.158442	-0.04935	0.395875	0.094882	0.002903	-0.07716	-0.03621	-0.22903
visual_attention	-0.64186	-0.42827	-0.35218	-0.38426	0.254087	-0.59053	-0.49121	-0.65073	-0.67701	-0.65134
visual_perception	-0.41238	-0.31826	-0.03682	-0.14316	0.258976	-0.45974	-0.3864	-0.50405	-0.40199	-0.61497
word_recognition	-0.13888	-0.16241	-0.02857	-0.00504	-0.14683	-0.04385	0.133384	-0.14927	-0.06738	-0.24095
working_memory	-0.12208	-0.01513	-0.13552	-0.1673	0.291367	-0.05668	-0.04752	-0.1508	-0.17219	-0.33934

## Sheet: PLS_disorders
Explained variance (EV)
	PLS1	PLS2	PLS3	PLS4	PLS5	PLS6	PLS7	PLS8	PLS9	PLS10	PLS11	PLS12	PLS13	PLS14	PLS15	PLS16	PLS17	PLS18	PLS19	PLS20	PLS21	PLS22	PLS23	PLS24	PLS25	PLS26	PLS27	PLS28	PLS29	PLS30	PLS31	PLS32	PLS33
ASD	0.609021	0.485812	0.431598	0.269517	0.206619	0.1784	0.140654	0.131215	0.0878165	0.0927404	0.0626639	0.0273846	0.0296614	0.0208428	0.0163116	0.0077005	0.00350188	0.00160595	0.000933648	0.000365485	0.000196177	9.28493e-05	3.97244e-05	1.3649e-05	7.50644e-06	3.25977e-06	9.55344e-07	6.06156e-07	1.06877e-07	2.84699e-08	7.88661e-09	1.32365e-09	6.05985e-10
ADHD	0.629794	0.479332	0.352772	0.254706	0.210975	0.174859	0.199413	0.193984	0.125049	0.0868491	0.0668292	0.0401787	0.0385754	0.0232842	0.0168703	0.0118742	0.00763916	0.00405625	0.00186683	0.000860388	0.000603299	0.000249201	0.000123787	7.60277e-05	2.74079e-05	9.95723e-06	3.46811e-06	9.93083e-07	5.34949e-07	1.13372e-07	1.54031e-08	3.73635e-09	9.9289e-11
SCZ	0.712539	0.393326	0.307251	0.32463	0.239508	0.163403	0.151751	0.113743	0.0812427	0.0707507	0.0557743	0.0325741	0.0337556	0.0226277	0.0150264	0.00837567	0.00545228	0.0027867	0.00129843	0.00089329	0.000351399	0.000221505	0.000105589	4.15161e-05	1.60649e-05	5.84153e-06	3.16711e-06	7.27852e-07	3.13055e-07	7.48271e-08	4.93398e-09	1.36542e-09	2.98075e-10
BD	0.780134	0.285417	0.246463	0.328892	0.200636	0.240202	0.126997	0.125452	0.0699041	0.0431879	0.0511002	0.0286136	0.0234834	0.0182674	0.00905309	0.00520288	0.00403859	0.00174334	0.00105219	0.000439665	0.000306192	0.000182341	9.6042e-05	2.76754e-05	1.40196e-05	6.4206e-06	2.14155e-06	8.88184e-07	1.99238e-07	5.72795e-08	1.08638e-08	2.5409e-09	2.9367e-10
MDD	0.666878	0.520938	0.292076	0.198142	0.19599	0.187027	0.206031	0.144909	0.119269	0.062305	0.0495003	0.0327954	0.0248308	0.0121221	0.00709733	0.00535713	0.00307597	0.00191985	0.00103255	0.000539062	0.000258005	0.000105854	5.08777e-05	1.96496e-05	9.43174e-06	4.91078e-06	1.62698e-06	4.07899e-07	1.94291e-07	7.16123e-08	2.61633e-08	2.26982e-09	3.31012e-10
OCD	0.702889	0.390182	0.356286	0.136096	0.234965	0.184211	0.237095	0.157512	0.149189	0.0823532	0.072889	0.045209	0.0305717	0.0204552	0.0146719	0.00876372	0.00488587	0.00296892	0.00163209	0.000903071	0.000458297	0.000201095	0.000100152	5.01265e-05	2.59493e-05	8.79483e-06	2.32671e-06	1.05813e-06	4.6224e-07	9.54193e-08	3.70934e-08	7.92612e-09	6.05985e-10
FDR-corrected p-value
ASD	0.0025	0.057	0.073	0.09825	0.194	0.2148	0.2405	0.244	0.338	0.414	0.409	0.451	0.483	0.469	0.492	0.522	0.5065	0.499	0.528	0.512	0.503	0.5055	0.5165	0.512	0.516	0.516	0.5125	0.514	0.5215	0.52	0.5	0.518	0.516
ADHD	0	0.023	0.066	0.09825	0.194	0.2148	0.2405	0.244	0.338	0.414	0.409	0.451	0.483	0.469	0.492	0.522	0.5065	0.499	0.528	0.512	0.503	0.5055	0.5165	0.512	0.516	0.516	0.5125	0.514	0.5215	0.52	0.5	0.518	0.516
SCZ	0.00075	0.042	0.0852	0.09825	0.194	0.224	0.2405	0.244	0.338	0.414	0.409	0.451	0.483	0.469	0.492	0.522	0.5065	0.499	0.528	0.512	0.503	0.5055	0.5165	0.512	0.516	0.516	0.5125	0.514	0.5215	0.52	0.5	0.518	0.516
BD	0.00075	0.068	0.13	0.09825	0.194	0.2148	0.2405	0.244	0.338	0.414	0.409	0.451	0.483	0.469	0.492	0.522	0.5065	0.499	0.528	0.512	0.503	0.5055	0.5165	0.512	0.516	0.516	0.5125	0.514	0.5215	0.52	0.5	0.518	0.516
MDD	0.0012	0.009	0.0852	0.156	0.194	0.2148	0.2405	0.244	0.338	0.414	0.409	0.451	0.483	0.469	0.492	0.522	0.5065	0.499	0.528	0.512	0.503	0.5055	0.5165	0.512	0.516	0.516	0.5125	0.514	0.5215	0.52	0.5	0.518	0.516
OCD	0	0.023	0.066	0.1725	0.194	0.2148	0.2405	0.244	0.338	0.414	0.409	0.451	0.483	0.469	0.492	0.522	0.5065	0.499	0.528	0.512	0.503	0.5055	0.5165	0.512	0.516	0.516	0.5125	0.514	0.5215	0.52	0.5	0.518	0.516

## Sheet: PLS_MEG
Explained variance (EV)
	PLS1	PLS2	PLS3	PLS4	PLS5	PLS6	PLS7	PLS8	PLS9	PLS10	PLS11	PLS12	PLS13	PLS14	PLS15	PLS16	PLS17	PLS18	PLS19	PLS20	PLS21	PLS22	PLS23	PLS24	PLS25	PLS26	PLS27	PLS28	PLS29	PLS30	PLS31	PLS32	PLS33
Delta	0.811133	0.467702	0.237314	0.11093	0.129887	0.14081	0.105558	0.059673	0.051015	0.01879	0.013742	0.008077	0.008332	0.002536	0.001941	0.001491	0.001012	0.000483	0.000251	0.000152	8.23e-05	2.84e-05	1.33e-05	4.5e-06	4.09e-06	1.12e-06	5.71e-07	1.17e-07	5.76e-08	1.14e-08	1.62e-09	3.42e-10	2.22e-11
Theta	0.724097	0.501548	0.300843	0.233249	0.146713	0.144662	0.134468	0.08977	0.068102	0.055914	0.032744	0.036073	0.016204	0.011201	0.00855	0.003945	0.003313	0.001824	0.000843	0.000471	0.000309	0.000121	7.15e-05	2.73e-05	1.41e-05	4.87e-06	1.3e-06	6.63e-07	1.94e-07	8.68e-08	1.56e-08	2.8e-09	3.8e-10
Alpha	0.812038	0.464011	0.226049	0.160451	0.138668	0.126053	0.068808	0.063631	0.052042	0.029601	0.01967	0.020304	0.010756	0.004007	0.004626	0.002166	0.001061	0.000972	0.00051	0.00025	0.000103	6.25e-05	3.35e-05	1.4e-05	6.95e-06	2.58e-06	5.39e-07	2.47e-07	6.19e-08	3.22e-08	6.33e-09	1.65e-09	2.55e-10
Beta	0.830539	0.328108	0.245448	0.227878	0.190621	0.173021	0.109334	0.076485	0.052953	0.043149	0.029868	0.021482	0.013069	0.00885	0.003312	0.003693	0.002552	0.001138	0.000672	0.0003	0.000114	7.94e-05	3.49e-05	1.02e-05	6.25e-06	2.97e-06	1.23e-06	5.08e-07	1.94e-07	3.17e-08	1.18e-08	1.19e-09	4.24e-11
Low gamma	0.778168	0.512484	0.242824	0.109808	0.164774	0.093314	0.10245	0.089582	0.061484	0.03486	0.025672	0.018215	0.015796	0.010282	0.006368	0.004522	0.003007	0.001202	0.000686	0.000374	0.000199	9.26e-05	5.09e-05	2.09e-05	9.4e-06	4.44e-06	1.04e-06	5.73e-07	8.85e-08	3.54e-08	1.46e-08	2.2e-09	3.56e-10
High gamma	0.780138	0.50671	0.235021	0.144435	0.127931	0.141095	0.11314	0.064898	0.053941	0.034229	0.023137	0.014867	0.014398	0.01093	0.006914	0.004911	0.002832	0.00133	0.000666	0.000427	0.000237	9.87e-05	4.5e-05	1.85e-05	9.79e-06	3.37e-06	1.24e-06	4.44e-07	1.26e-07	4.18e-08	1.7e-08	8.9e-10	1.11e-10
FDR-corrected p-value
Delta	0.003	0.066	0.305	0.3835	0.375	0.344	0.3565	0.4365	0.442	0.442	0.455	0.481	0.4825	0.513	0.496	0.504	0.5085	0.5005	0.524	0.512	0.5125	0.523	0.529	0.5155	0.5175	0.5055	0.5125	0.5315	0.508	0.5165	0.5175	0.502	0.5045
Theta	0.0012	0.1452	0.305	0.303	0.375	0.344	0.3565	0.4365	0.442	0.442	0.455	0.481	0.4825	0.513	0.496	0.504	0.5085	0.5005	0.524	0.512	0.5125	0.523	0.529	0.5155	0.5175	0.5055	0.5125	0.5315	0.508	0.5165	0.5175	0.502	0.5045
Alpha	0.00075	0.1452	0.305	0.306	0.375	0.344	0.3565	0.4365	0.442	0.442	0.455	0.481	0.4825	0.513	0.496	0.504	0.5085	0.5005	0.524	0.512	0.5125	0.523	0.529	0.5155	0.5175	0.5055	0.5125	0.5315	0.508	0.5165	0.5175	0.502	0.5045
Beta	0	0.151	0.305	0.303	0.375	0.344	0.3565	0.4365	0.442	0.442	0.455	0.481	0.4825	0.513	0.496	0.504	0.5085	0.5005	0.524	0.512	0.5125	0.523	0.529	0.5155	0.5175	0.5055	0.5125	0.5315	0.508	0.5165	0.5175	0.502	0.5045
Low gamma	0	0.066	0.305	0.3835	0.375	0.344	0.3565	0.4365	0.442	0.442	0.455	0.481	0.4825	0.513	0.496	0.504	0.5085	0.5005	0.524	0.512	0.5125	0.523	0.529	0.5155	0.5175	0.5055	0.5125	0.5315	0.508	0.5165	0.5175	0.502	0.5045
High gamma	0	0.039	0.305	0.3835	0.375	0.344	0.3565	0.4365	0.442	0.442	0.455	0.481	0.4825	0.513	0.496	0.504	0.5085	0.5005	0.524	0.512	0.5125	0.523	0.529	0.5155	0.5175	0.5055	0.5125	0.5315	0.508	0.5165	0.5175	0.502	0.5045

## Sheet: PLS-ranked genes_disorders
	ASD		ADHD		SCZ		BD		MDD		OCD
0	MID1	4.81707	GTF2H5	7.95108	CALM3	5.28658	YPEL5	6.09169	SMIM10L2B	6.69986	KIAA1549	5.15764
1	WNT7B	4.77894	UBA52	7.36322	PAFAH1B1	5.14077	ARHGAP20	5.85692	GMFB	6.59745	ABCC12	5.09459
2	C6orf118	4.73832	TIMM8B	7.15037	YPEL5	5.07322	FARSA	5.84581	SYT17	6.55752	CERS6	5.02739
3	GPC5	4.73172	C11orf97	7.14935	HPRT1	5.06806	PHLPP2	5.83858	RBP4	6.52861	SIDT1	5.02063
4	PDLIM5	4.72333	TMEM176B	7.14557	BICC1	5.06533	CCNL2	5.74783	SMIM10L2A	6.48952	CACNB2	5.00021
5	PALMD	4.7091	FGGY	7.13837	PHLPP2	5.05573	EMC3	5.71807	SLIT1	6.44844	SPRN	4.99351
6	LOC100507516	4.7014	CPE	7.10094	KCNV1	4.98606	RNF175	5.71326	PID1	6.42649	SV2B	4.98082
7	CACHD1	4.65074	UBL5	7.00463	RNF145	4.97983	ARHGEF7	5.67986	PRKCD	6.42062	CCDC68	4.92801
8	LOC100506100	4.62363	ALDH2	6.98814	BTBD10	4.97058	C3orf80	5.6724	SHISAL1	6.40571	SLC39A3	4.90162
9	C12orf75	4.61897	ERICH6-AS1	6.95765	GPR155	4.96091	YWHAG	5.66582	CEBPA	6.31206	XK	4.87759
10	COCH	4.59179	FZD2	6.90538	KCNK1	4.95347	MAP2K4	5.62236	IFT22	6.28185	MED8	4.86881
11	S100A10	4.52561	OST4	6.90451	ARHGEF7	4.888	RNF41	5.5627	EFCAB1	6.27867	GRASP	4.86724
12	EGLN1	4.51943	ALDH9A1	6.88455	CCNL2	4.8844	ATG7	5.55743	ATOH7	6.27734	BASP1	4.85429
13	PPCS	4.49935	TBCA	6.69797	CACNB2	4.83919	DUSP2	5.53951	CTXN1	6.266	SYT1	4.82565
14	LUZP2	4.49594	HSBP1	6.66225	RTN3	4.82699	NMNAT2	5.53695	SULF2	6.26503	RPGRIP1L	4.81658
15	BAG3	4.48619	TXNL4A	6.66117	UBE2K	4.80135	PAFAH1B1	5.53534	HSD11B1L	6.25448	MAL2	4.77437
16	CAPZB	4.45828	RNASET2	6.64483	ORC5	4.78348	SENP2	5.50812	RAB27B	6.23862	CDYL2	4.77045
17	TMEM100	4.44901	TXN	6.61259	CERS6	4.75583	STEAP1	5.49336	SSTR1	6.22561	STX1A	4.7558
18	FBXO15	4.43957	VSIG4	6.57904	NSF	4.74449	BTBD10	5.48704	PPP4R4	6.223	ARHGEF7	4.75219
19	SLC2A5	4.4367	NDUFAF8	6.54755	WSB2	4.74328	RUNDC1	5.48293	TUBB8P12	6.18315	DUSP2	4.75164
20	TEAD3	4.42783	TMEM255A	6.52929	NMNAT2	4.74004	HSPA8	5.4805	WNT10B	6.15879	ARSJ	4.74523
21	CA8	4.42169	C1orf50	6.52527	LAMB1	4.73671	PHLDA2	5.45192	EFNB2	6.13462	GPD1L	4.73222
22	TMEM255A	4.40609	LOC100506100	6.51372	ITFG1	4.70499	FLJ33534	5.44675	GABRB1	6.1088	AP3B2	4.72862
23	MACROD2	4.39841	LOC100507516	6.50365	ATG7	4.70249	SV2B	5.44539	NUDT11	6.09297	TRABD2A	4.72678
24	FOLR1	4.39396	POLE4	6.47406	CDYL2	4.68662	CALM3	5.43163	TUBB2A	6.01948	DUSP3	4.71043
25	TMEM200A	4.37278	SRM	6.443	SV2B	4.68625	NRCAM	5.42057	C2CD4C	6.01281	RASD1	4.70231
26	CTXND1	4.3649	CETN2	6.42148	PCDHAC2	4.65924	CDCA5	5.40207	NIT2	6.00044	OR14I1	4.693
27	LRRC56	4.35394	VPS29	6.41749	TMEM178B	4.65367	RHEBL1	5.40134	ATP2B4	5.99931	SEH1L	4.68472
28	PARD3	4.35331	SSSCA1	6.38532	RUNDC1	4.64792	GPR155	5.39917	DNAJC2	5.99366	SEC24D	4.67739
29	LILRB4	4.32126	DDA1	6.36115	XK	4.63502	NUDT4	5.39502	PYCR3	5.9767	ATG7	4.67577
30	RNF7	4.29307	FAH	6.34639	PPP1R14C	4.62867	BRPF3	5.37911	SMIM29	5.96202	OLFM3	4.67366
31	TRIM8	4.28728	ST5	6.33693	KIAA1549	4.62645	GPD1L	5.37623	FXYD6	5.95206	KIAA1549L	4.67248
32	SEMA3D	4.26986	APTR	6.30727	PEF1	4.59669	HPRT1	5.35585	LARGE1	5.95052	LRRK1	4.66859
33	DNAJC12	4.24743	IFI27L2	6.29217	CDCA5	4.589	SLC9A6	5.34129	PRNP	5.9451	RHEBL1	4.65759
34	FAM167A-AS1	4.2468	UROS	6.2786	SLC9A6	4.58435	STAT6	5.34068	NT5DC3	5.92877	KCNV1	4.65548
35	FAM117A	4.23201	MT2A	6.25251	PPP3R1	4.58139	TMEM178B	5.33148	LOC100288911	5.91878	RAB15	4.65338
36	CDH4	4.22337	IFT22	6.23659	MTMR9	4.5813	ATP6V1A	5.30872	KCNK2	5.90479	THY1	4.64927
37	GPD2	4.2177	UQCC2	6.2162	SEH1L	4.57599	TUBG1	5.28661	C11orf97	5.90406	RUNDC1	4.64921
38	FCGR1B	4.21642	LINC01094	6.20229	RHEBL1	4.54485	PPP1R12A	5.28214	C2orf80	5.89638	AGBL4	4.63991
39	ARHGAP6	4.21371	DEAF1	6.18959	MANBAL	4.54153	BICC1	5.27654	TMEM158	5.88957	PHF24	4.63346
40	SPA17	4.20468	IL33	6.16384	ZNF184	4.53809	PDK3	5.26298	DYDC2	5.8786	PPP1R14C	4.62527
41	RHPN2	4.19627	DYDC2	6.15905	LOC440040	4.53449	ASB6	5.2534	SLC26A4-AS1	5.86327	PAK1	4.62053
42	LRMDA	4.18682	SMIM10L2A	6.15434	SENP2	4.53386	MTX2	5.25191	ARHGEF28	5.85518	COL12A1	4.62048
43	SCN9A	4.16443	NADK2	6.14128	YWHAG	4.53347	PEX11B	5.2489	MTCH1	5.82941	SCN2A	4.61478
44	IRF5	4.16384	GTF3C6	6.1298	FLJ20021	4.52649	MANBAL	5.24574	FKBP1B	5.82273	PKP3	4.61218
45	VIM	4.16364	RNF7	6.12588	MAP2K4	4.51996	USP7	5.24435	RAET1E-AS1	5.8108	SLC9A6	4.61168
46	WWC1	4.15045	DKFZp779M0652	6.10729	COL12A1	4.51861	LINC01116	5.20852	CENPVL3	5.79696	MAPK13	4.60819
47	NUDT17	4.14513	ITGAM	6.10641	LY86-AS1	4.51689	DBNDD1	5.20609	MTA3	5.79254	TTPAL	4.60355
48	MCFD2	4.14215	ACOX2	6.08998	OR14I1	4.51272	BEND5	5.18783	CDH9	5.79171	NECTIN1	4.59976
49	ATXN10	4.14002	PTPRZ1	6.07679	AP2S1	4.50925	KIF17	5.18385	RNF150	5.79	PPP3R1	4.59808
50	ACSF2	4.12216	VTI1B	6.06021	STEAP1	4.50378	TRMT10C	5.16729	AHRR	5.77679	MTMR9	4.58774
51	FXN	4.1145	SPATA33	6.04534	SLC16A14	4.49874	OR14I1	5.16709	TOM1L1	5.76969	FRMD6	4.58618
52	RSPH1	4.11181	PLCB2	6.04228	CHL1	4.4942	RTN3	5.1503	BATF3	5.76851	CALM3	4.57761
53	ALDH9A1	4.09615	SP5	6.04136	VPS35	4.48863	MTMR9	5.14799	ATP6V1C1	5.76199	BAIAP2	4.5659
54	SUMO3	4.08651	BBOX1	6.0386	CISD1	4.48443	TPD52	5.14796	TMEM263	5.74512	ARL6	4.56387
55	GLRA2	4.08119	NIT2	6.03551	FNIP2	4.4748	REPS2	5.14326	SHISA5	5.74189	RAB11FIP1	4.56206
56	ANTXR1	4.0558	DDAH2	6.02284	CHRNA7	4.47149	DLEU7	5.14246	BRWD1	5.74083	FIG4	4.55963
57	PINLYP	4.05241	SLC7A11	6.01109	RPGRIP1L	4.46771	PPP1R14C	5.13606	C1QL3	5.73639	STAT6	4.55464
58	RGS14	4.04908	HACD4	6.01038	TPI1	4.46569	DEDD2	5.1303	WDR86	5.73179	C16orf58	4.52797
59	PEG10	4.04859	RAC2	6.00924	ZNF215	4.46403	PEF1	5.12877	B3GALT6	5.72964	SLC39A10	4.52443
60	KCNE4	4.04764	UFC1	6.00808	SUPT7L	4.45994	KIAA1549	5.12295	CNR1	5.71835	NMNAT2	4.52287
61	PTPRZ1	4.03027	CENPVL3	6.00246	MAGEE1	4.45709	WSB2	5.11791	LDHD	5.71426	NEURL3	4.51487
62	DEAF1	4.02753	LOC101927752	6.00049	COL24A1	4.44617	KHDC1	5.11156	PLPPR3	5.70974	FAM49A	4.50797
63	TNFAIP2	4.01964	DTNBP1	5.99218	HSPH1	4.44434	ATP6V0C	5.10862	CALML3	5.70036	SH2D5	4.49526
64	DR1	4.00672	CACUL1	5.98212	STAT6	4.44172	AKAP11	5.10823	LY6H	5.70027	ATP6V0A1	4.4849
65	NHSL1	4.00639	SH3RF1	5.98119	PDK3	4.43366	CLTA	5.1068	GSKIP	5.6981	NDST3	4.47914
66	MIR7515HG	3.99397	SMIM4	5.96841	RAB15	4.43235	KCNV1	5.09839	GGCT	5.68389	KIF17	4.469
67	ABCA1	3.99188	GMFG	5.96522	SPCS3	4.43181	SERINC3	5.09535	CHCHD6	5.66676	ZNF681	4.46836
68	CALHM6	3.98998	WDFY4	5.96324	MTX2	4.43107	YARS2	5.09294	NADK2	5.65323	TLN2	4.46413
69	OXTR	3.98636	IFT27	5.95762	IARS	4.42732	DCP2	5.07317	DOC2A	5.64694	WASF1	4.4631
70	GPC4	3.9831	CMTM7	5.93448	MAPK13	4.42638	ATP6V0A1	5.07018	THRA	5.6465	KIF3C	4.44904
71	MTM1	3.97395	FAM181A	5.92902	DUSP2	4.4263	RTN1	5.06919	ACADL	5.64476	ENTPD6	4.44841
72	FCGBP	3.96761	TAF10	5.90974	SYT5	4.4257	SLC16A14	5.06815	PNCK	5.64474	CCK	4.44652
73	RGS20	3.9628	PYGL	5.88433	RAB6B	4.42428	GMPPB	5.06717	PCBD1	5.64225	PWWP2B	4.44463
74	ZNF516	3.95301	S100A16	5.87958	MLLT11	4.42102	CAMK1G	5.0592	NSFL1C	5.64055	KCNB2	4.44358
75	PIK3AP1	3.95149	NKAIN3	5.87561	SEC24D	4.41663	ATG5	5.05638	AP3S1	5.63941	TNFAIP8L1	4.43889
76	ERICH2	3.94899	IMPACT	5.8728	EMC3	4.40365	HSPH1	5.04271	GPRIN2	5.61712	ORC5	4.43746
77	FBLN2	3.94733	LYPD1	5.86499	EHD3	4.3987	LY86-AS1	5.02677	KIF21B	5.61361	RASL11B	4.4346
78	ITGAM	3.94089	WNT7B	5.86165	PPP3CB	4.39785	PI4KA	5.02465	MSANTD1	5.60245	AP1M1	4.40992
79	LCTL	3.93896	TUBB2B	5.84068	DCAF4	4.39757	GALNTL5	5.02044	MMD	5.60083	GALNT17	4.39704
80	ETNPPL	3.92896	UMPS	5.83937	ZNF681	4.39602	TPI1	5.01508	ARFGEF3	5.59869	JAG2	4.39059
81	CD84	3.92798	MMD	5.83749	OLFM3	4.39475	MAPK13	5.01487	IMPACT	5.596	PLXNA1	4.38774
82	TMOD3	3.92449	CACHD1	5.81987	CDC6	4.39227	LRRC14	5.00987	SNCA	5.5933	SATL1	4.38303
83	PLPP4	3.921	DMGDH	5.80823	WDR7	4.38713	PCYOX1L	5.00502	PKIA	5.57835	DENR	4.37795
84	GS1-124K5.4	3.91682	AKR7A2	5.80371	DPP10-AS1	4.38576	SNU13	5.00202	NANOS1	5.5782	CAMK1G	4.37006
85	COL8A2	3.91059	PTRHD1	5.79828	CHRM2	4.37969	KCNJ12	5.00194	C8orf46	5.56234	LRRTM4	4.35608
86	GNG2	3.91035	HSPB11	5.79732	PRSS3	4.37715	GLT1D1	5.00079	ZNF831	5.55728	GNB1L	4.35536
87	DIRAS3	3.90798	C16orf74	5.79718	SELENOI	4.37377	TRABD2A	4.99786	RAP2B	5.55004	SYN1	4.35393
88	CXCL2	3.90337	RIIAD1	5.79459	PPP2CA	4.37029	SLC10A4	4.99585	YPEL1	5.54804	FILIP1L	4.35384
89	TFG	3.89953	MCUR1	5.79039	GPD1L	4.36318	ANKRD30B	4.99524	TDRD9	5.54501	TPD52	4.35321
90	LOC105376064	3.89419	EFEMP2	5.78548	PCYOX1L	4.36032	BAIAP2L2	4.9676	KCTD12	5.54072	SERINC3	4.34799
91	DNAH9	3.88549	CIB2	5.78486	PPP3R2	4.35937	MEI1	4.96667	BCR	5.53869	FBXO44	4.34526
92	ZNF883	3.88185	FAM129B	5.77902	CUL2	4.35874	RAB6B	4.96613	DYNLL1	5.53775	GRK6	4.34175
93	ANP32E	3.88183	WLS	5.77729	SIDT1	4.3561	GS1-124K5.11	4.95367	CTNND2	5.52523	DOCK4	4.33792
94	NTSR2	3.8667	WWC1	5.77009	PKD2L1	4.35109	SH2D5	4.95299	LINC01197	5.51723	KCNK1	4.31273
95	GRAMD1C	3.86128	NTSR2	5.74628	PRSS1	4.33873	SNAP47	4.95189	PSMG3-AS1	5.51495	ZNF184	4.30653
96	OAS1	3.84726	HCST	5.74211	RTN1	4.33765	PKP3	4.94827	SVOP	5.49407	RAPGEF2	4.30503
97	NRL	3.84725	RNASE6	5.72899	ANKRD30B	4.33533	COL12A1	4.94759	ERFE	5.49	RGS4	4.30324
98	SYNJ2BP	3.84594	ATXN10	5.72361	PANX1	4.32908	AACS	4.94312	MAGEH1	5.4828	ARF3	4.30072
99	IL13RA2	3.84572	PBXIP1	5.71289	DLK2	4.32604	MFSD3	4.9361	DOK6	5.46942	TBPL1	4.30029
100	ERICH6-AS1	3.84429	EIF3H	5.70693	ATP6V0C	4.32148	FAIM2	4.93565	FAM149A	5.45639	CHRM3	4.29998
101	PDYN	3.8414	SOX9-AS1	5.69499	HK1	4.32047	ABCC12	4.93374	TMSB10	5.44551	CALHM1	4.29361
102	APOPT1	3.82855	HIST1H2BK	5.68928	CYP4Z1	4.30362	PITPNB	4.93147	KLK10	5.4414	TBL1XR1	4.29173
103	APOC1	3.82505	HEYL	5.6843	LINC01116	4.30043	NEURL3	4.93038	GABRA3	5.43952	ZDHHC23	4.28812
104	STOM	3.8207	KCNQ1	5.68416	SLC39A3	4.29948	DDX10	4.92785	MRPL37	5.43575	BICC1	4.2873
105	GRIK5	3.81641	ACSF2	5.68281	AK5	4.29694	IFI6	4.92768	MBOAT7	5.43534	TBC1D22B	4.2842
106	SLAMF7	3.81584	BCR	5.67663	ATP6V0A1	4.29685	HTR1E	4.92664	TMEFF2	5.43341	ASB6	4.28386
107	LOC100129291	3.81309	NUPR1	5.67601	CAPRIN1	4.29294	AKAP8	4.92464	CYP46A1	5.42314	GRM8	4.28185
108	RNASET2	3.81273	LCP1	5.66225	C1orf216	4.28417	SLC22A18	4.92357	NISCH	5.40861	CDH8	4.27922
109	KCMF1	3.8115	MGST1	5.65787	LHPP	4.28216	CALHM2	4.92344	SCN3B	5.40657	CYB561	4.27333
110	GPR179	3.80535	PRR5	5.651	PSMD1	4.27415	DHRS7B	4.92319	PPP5D1	5.40257	ATP9A	4.27111
111	C10orf105	3.79947	FADS2	5.64825	TOMM20	4.27321	LHPP	4.92154	CCBE1	5.40133	RBM24	4.26739
112	APTR	3.7983	ETNPPL	5.64103	MAP2K1	4.27175	RFC2	4.91941	MCUB	5.40102	THRB	4.26601
113	GRIA1	3.78933	PAX6	5.63126	FIG4	4.26449	RGS4	4.91701	CORO1A	5.39871	CDCA5	4.25944
114	HSPB11	3.78305	APOPT1	5.62955	RNF175	4.26254	WAC-AS1	4.91553	ZSCAN18	5.39861	C16orf87	4.25905
115	PCDH15	3.78276	GS1-124K5.4	5.62112	C3orf80	4.25819	PKD2L1	4.91476	MYDGF	5.39267	PDE1B	4.2585
116	LINC00886	3.78069	PDCD5	5.6136	SH3BGRL2	4.25305	CHRM2	4.90728	SCGN	5.3909	NECAB1	4.24716
117	ATP6V0E2-AS1	3.78036	RAB13	5.6114	MAPK11	4.2499	TIMM17A	4.90229	NUDT10	5.38731	C3orf80	4.24674
118	OBSCN	3.77791	CDC42P3	5.60788	FLAD1	4.24801	SH3BGRL2	4.89376	PRR5	5.38158	FBXL2	4.2458
119	RPA4	3.77778	GPRIN2	5.60774	PAK1	4.24643	MYOM2	4.89163	EPHA10	5.37958	AK5	4.24212
120	NUCB2	3.77618	FAM107A	5.603	OPTN	4.24415	MUM1L1	4.88316	HRH1	5.36965	B4GALT5	4.23537
121	CACNG4	3.77564	CNN3	5.60221	ABCC12	4.24276	RNF145	4.88103	PDGFC	5.36781	BOP1	4.23527
122	PLCB2	3.77422	MAPK8IP1P2	5.60115	RFC2	4.23264	FLJ20021	4.87729	SNX7	5.3664	MED12L	4.23298
123	EML4	3.77135	SLC2A5	5.59439	METTL1	4.23062	BTBD1	4.87583	F12	5.36378	GPR155	4.23133
124	TEF	3.75921	FAM86B3P	5.59179	OLA1	4.22441	ZNF681	4.87118	NUS1	5.35698	CHRM2	4.23062
125	NT5C3A	3.7562	FGF2	5.58765	LYRM4	4.21611	FIBP	4.86503	CCT5	5.3556	TMEM178B	4.22791
126	DYDC2	3.7556	KCTD12	5.58526	TNFAIP8L1	4.21308	AP1M1	4.86164	GRIN3A	5.35545	ANKRD28	4.22321
127	FAM129A	3.73763	CALML3	5.58417	FLJ33534	4.21033	PSMA6	4.85714	EFNB3	5.35516	MCHR2	4.21806
128	AK4	3.7369	AP3S1	5.58293	SMAP2	4.20803	LYRM4	4.85328	NDUFC2	5.35093	MUM1L1	4.21661
129	NR2F2-AS1	3.73578	SMARCD3	5.5803	SH2D5	4.20356	RASD1	4.85077	GNB2	5.34957	CDC40	4.21524
130	NR2F2	3.73507	ADAP2	5.57717	CDC42SE2	4.19638	CACNG6	4.84972	CHST1	5.343	GABRB3	4.21491
131	ALG8	3.73352	ATP6V0A4	5.54836	SNX32	4.19289	HS3ST2	4.84934	UCHL1	5.33864	RCSD1	4.21481
132	MAPK8IP1P2	3.73108	PID1	5.54476	CALHM2	4.19063	DCAF4	4.84468	LYRM9	5.32788	TUBA4B	4.21137
133	CPLX3	3.72909	ARL16	5.53893	DUSP3	4.18077	MEDAG	4.83927	PLPPR2	5.32452	ZNF202	4.21036
134	RNASE6	3.72869	SMIM10L2B	5.53804	ARNTL2	4.1769	VCL	4.83777	PIANP	5.32308	PHLDA2	4.20745
135	RXRA	3.72752	ROBO1	5.53735	TRABD2A	4.17614	SEC24D	4.83505	LINC01140	5.31956	CDC42SE2	4.20399
136	SEMA4A	3.7243	SUSD3	5.53584	KCNH7	4.17356	ATG101	4.83073	ARHGAP33	5.31658	TUBB4B	4.20084
137	HIF3A	3.72389	B4GALT2	5.53511	TPX2	4.17194	SERPINF1	4.82647	CACNA1H	5.31458	WDR17	4.19602
138	VSIG4	3.72052	HLA-DMB	5.53353	RASD1	4.17013	RANGAP1	4.82166	TMEM106C	5.30314	MPPED2	4.19534
139	PCOLCE2	3.71811	MT1G	5.53271	UBE2E2	4.16854	UBE2K	4.82144	HTR1A	5.30297	MKL2	4.19017
140	PCK2	3.717	GDPD2	5.53234	KLHL2	4.16566	RTN4IP1	4.8153	TNFRSF11A	5.30103	ZNF215	4.18824
141	ATP6V0A4	3.71257	SEC11C	5.516	DGKB	4.1647	ELP3	4.81438	VPS26B	5.30049	LPL	4.18415
142	PPM1N	3.70532	UBE2A	5.50637	NUDCD1	4.16294	NSF	4.8064	CYB5D2	5.28431	TSTA3	4.17902
143	SLC7A11	3.70224	FXYD1	5.50452	MYH10	4.15784	CASQ1	4.80564	TMEM159	5.26769	MAPK11	4.17861
144	CMIP	3.69961	RNF5P1	5.48266	AP3B2	4.15631	RALBP1	4.79799	ACTG1	5.26677	PHLPP2	4.16498
145	SLC6A16	3.69544	MDK	5.47606	TRPV2	4.14918	NDEL1	4.79693	MRAS	5.26279	LKAAEAR1	4.16313
146	GNG10	3.6901	HSDL2	5.47177	AP1M1	4.14086	DPP10	4.78429	XYLT1	5.25824	TRPV2	4.16202
147	FAM9B	3.68368	CACNG4	5.46537	NRCAM	4.13832	CHRNA7	4.78381	TUBB6	5.24866	CBLN1	4.16194
148	PTHLH	3.68289	GSTM2	5.46493	DDX10	4.13791	BCAS3	4.76821	SUMF1	5.24666	SERPINI1	4.15781
149	RRAGD	3.68171	SYK	5.46316	ASB6	4.13705	LMO4	4.7669	UBE2S	5.24247	RAB39B	4.15749
150	LYPD1	3.67388	SNRPC	5.45997	REPS2	4.13647	LINC01963	4.76501	SH3RF1	5.24128	BTRC	4.15451
151	FGL2	3.67039	LYRM2	5.45529	SLC35A2	4.13469	SH3GLB2	4.76189	LOC440934	5.23476	SLITRK5	4.15273
152	LOXL1	3.66641	PEX19	5.4509	SYT1	4.13339	FXR2	4.75906	DDAH1	5.23426	PIK3R1	4.1527
153	FAM89A	3.66521	MYOM1	5.43548	CYB561	4.1294	SERPINI1	4.75899	KCNG3	5.22525	SLC25A44	4.15079
154	SYK	3.66362	FOLR2	5.43358	YWHAH	4.12818	SUPT7L	4.75814	TMEM130	5.22321	LNPK	4.14054
155	STAB1	3.6636	MRPS16	5.42892	DLEU7	4.12632	CISD1	4.74936	ASCL2	5.22186	ARHGEF25	4.13598
156	TRPC4	3.65409	MAPK3	5.42603	MAP4K3	4.1232	CDIP1	4.74698	AP3M2	5.20466	OSTF1	4.12943
157	IPO5P1	3.6507	SNRPD3	5.4242	WDR47	4.12272	VIT	4.74676	ANO3	5.19361	TUFT1	4.12688
158	CALB2	3.64929	SELENOW	5.42409	EGR3	4.11247	DYNLT3	4.74456	BIRC3	5.18621	LONRF2	4.12283
159	OST4	3.64776	STOM	5.42073	TMEM242	4.11105	C9orf40	4.74439	NUDT14	5.18061	WDR7	4.11649
160	FAM196A	3.64546	MT1X	5.41497	LONRF2	4.11099	ACTA1	4.73864	VAV1	5.17823	PNMA8A	4.11589
161	ACBD7	3.64247	CCDC148	5.4135	LPL	4.11089	ADRA1D	4.73655	GDA	5.16912	FRAS1	4.11508
162	TMEM106A	3.64179	RPL29	5.41226	CDC40	4.11073	FLAD1	4.73398	SLC16A2	5.16192	NLK	4.11144
163	ARHGAP18	3.64011	LOC105374546	5.41025	DOCK3	4.11043	SYNGR3	4.73249	CDKN2D	5.16066	GRIA2	4.10902
164	CHMP1B	3.63798	TMEM136	5.40346	KIF3C	4.10918	DTX4	4.73039	DGKB	5.15984	ARHGEF9	4.10041
165	ZNF880	3.63789	COL8A2	5.39699	SCG5	4.10903	DGCR5	4.7271	KIF2A	5.15191	LTK	4.09876
166	C1orf61	3.63372	CALHM6	5.38674	TUBB4B	4.10827	CCDC110	4.72591	ARHGDIG	5.15184	LCN15	4.09481
167	TLE1	3.62984	NME4	5.38366	NMT2	4.10813	EHD3	4.72525	ORC6	5.15062	CARTPT	4.09327
168	LPAR6	3.62942	RAB34	5.37615	GS1-124K5.11	4.10721	CALHM1	4.72224	CENPW	5.14536	STYK1	4.09092
169	FNBP1L	3.61529	ZNF226	5.36997	CA10	4.10448	CLPTM1L	4.72084	SUB1	5.13688	BEND5	4.09031
170	MYOM1	3.61273	TIMP3	5.36287	BCAS3	4.10312	WAC	4.71673	PTPRF	5.12799	CREG2	4.08709
171	PPP1R1A	3.61046	RPS2P32	5.35791	USP7	4.0935	CERS6	4.71617	LRRC2	5.12767	ENC1	4.08548
172	PTPRG	3.60849	IGSF6	5.35579	TNFRSF11A	4.0883	KCNH7	4.71284	NKAIN2	5.12168	TYRO3	4.08472
173	CENPVL3	3.59441	VBP1	5.35547	ARL6	4.08823	AGBL4	4.7064	SNHG8	5.12039	PRKAR2B	4.07982
174	RAVER2	3.58458	RGS20	5.33211	ATP6V0CP3	4.08237	LRSAM1	4.70336	RSU1	5.12	HDAC9	4.07932
175	GSTM1	3.58442	RXRA	5.33106	HSPA8	4.08057	RNF8	4.69931	DCAF11	5.11108	SLC17A7	4.07348
176	ASAH1	3.58339	ALKAL2	5.3297	PPP1R12A	4.08	LKAAEAR1	4.69859	TYW5	5.10889	FAM160A2	4.07112
177	IGDCC4	3.58317	CCDC8	5.32878	GLCE	4.07428	MLLT11	4.69821	FKBP1A	5.1032	PDK3	4.06877
178	NR0B1	3.582	HRAS	5.32777	PHLDA2	4.07326	SEH1L	4.69059	UCHL3	5.10101	C5orf30	4.06853
179	AKR7A2	3.57253	UG0898H09	5.32073	VAPB	4.07273	LAMB1	4.69033	PCDH20	5.09039	RFTN1	4.06819
180	SLC15A3	3.56992	LIX1	5.31396	NPY5R	4.07163	IMMT	4.68856	ZFP64	5.08426	GRIA3	4.06665
181	RSU1	3.56722	ARHGAP5-AS1	5.30695	CAND2	4.06805	GFOD2	4.68058	BAIAP3	5.08077	CALHM2	4.0661
182	CABCOCO1	3.56596	TTPA	5.30461	GPAT2	4.06629	ATP6V0CP3	4.67263	CELF5	5.07835	SYNGR1	4.06137
183	IL1B	3.56468	BCRP2	5.302	GFOD2	4.0603	GNB1L	4.67068	BCKDK	5.07785	ZNF721	4.05872
184	FAM155B	3.56269	LINC00461	5.3005	MED8	4.05582	AP2S1	4.66536	RIOX2	5.06803	ADGRF5	4.0564
185	BORCS7	3.56247	LUZP2	5.30032	SLC25A46	4.05244	FREM3	4.66057	PEA15	5.06646	TMPO	4.05143
186	PALLD	3.55896	SOX11	5.29613	ACTR1A	4.04878	CNTNAP2	4.65836	CD83	5.06379	MLIP	4.05019
187	TIMP1	3.5575	FABP5P3	5.29418	TPD52	4.04575	SELENOI	4.65654	ENOX1	5.06291	CHL1	4.0498
188	BPHL	3.55427	ATP6V0E2-AS1	5.28927	NEURL3	4.04317	PTPA	4.65397	B4GALT2	5.05529	LCLAT1	4.04947
189	TUBB2B	3.55371	LRRC42	5.28396	LY6E	4.04125	KCNK1	4.64818	SCPEP1	5.05519	RTN3	4.04526
190	ITPRIPL2	3.55299	EDARADD	5.28329	RAD23B	4.04077	CYB561	4.64176	POLE4	5.05369	DGCR5	4.04513
191	LIMK2	3.55227	AKR7L	5.28107	GNB1L	4.03753	NPY1R	4.63583	SLC25A23	5.05334	LMBRD2	4.04293
192	CACFD1	3.55203	TMEM176A	5.27725	TP53TG3D	4.03577	DUSP3	4.63396	FIGNL2	5.05177	CABYR	4.0419
193	TBXT	3.54823	C12orf75	5.27651	A1BG-AS1	4.03473	PEBP1	4.63315	LOXL1	5.051	MCHR1	4.04024
194	SBF2	3.54748	TRAF3IP2	5.27302	THY1	4.02587	LAMB3	4.63018	RGMB	5.05073	TSHZ2	4.0392
195	DMGDH	3.54737	MPHOSPH6	5.27048	FARSA	4.02449	SLC39A10	4.62856	BEGAIN	5.04967	GPR150	4.03785
196	GTF2H5	3.5458	ADIRF	5.26901	DNM1L	4.02276	CDYL2	4.62552	C1QL1	5.04075	PI4KA	4.03728
197	SEZ6	3.54527	RPL29P2	5.26783	LRRC73	4.00894	OLFM3	4.62367	MOB1B	5.04045	DCP2	4.02966
198	PPP1R42	3.54521	PNP	5.26659	TUBG1	4.00297	ORC5	4.62311	FADS3	5.03799	SPICE1	4.02669
199	PSD	3.53968	DOK6	5.2661	LNPK	4.00102	SYT5	4.62227	LOC728392	5.03767	FZR1	4.02324
200	HMGB3P1	3.53931	POLR2L	5.26426	SERINC3	4.00027	APEH	4.61955	STOML1	5.03514	NUDT4	4.01496
201	YWHAEP1	3.53748	RNF150	5.25765	AP1S1	3.99404	STUB1	4.6188	PEX19	5.03266	STEAP1	4.01392
202	AKR7A3	3.53737	C22orf39	5.25095	GALNTL5	3.99322	C5orf30	4.61376	MAGED1	5.0309	LAMB3	4.01114
203	MAPK1	3.53095	AGAP3	5.24882	GLT1D1	3.99064	GATB	4.60938	RAB36	5.02969	CBLN4	4.00793
204	DAB1	3.53045	CASP1	5.24873	FAM131A	3.98989	PFN2	4.6082	PTPRA	5.02916	EXD3	4.00758
205	CD8A	3.52276	LINC02482	5.24311	FGFR1OP2	3.9888	TBC1D22B	4.60521	FAM71F1	5.02733	ASXL3	4.00703
206	LOC100240735	3.52099	CNIH2	5.23507	TUBA4A	3.98722	KIAA1549L	4.60478	PLB1	5.025	ARMCX2	4.00411
207	LINC02076	3.51848	EEF1B2	5.23072	TIMM17A	3.98632	EXOSC9	4.60416	STK32C	5.01952	NPY5R	4.00174
208	EIF4G1	3.51749	GUK1	5.22325	C9orf40	3.98249	RMND1	4.5992	C1S	5.01842	KCNG3	4.0016
209	NUTF2	3.51678	PTHLH	5.22255	ATP6V1A	3.9803	SND1	4.59406	VSIG10L	5.01834	CYP4Z1	4.0001
210	GLUD1	3.51677	KCMF1	5.22142	VPS16	3.9782	TPBG	4.59394	HPCAL4	5.01746	CDC34	3.99981
211	TMEM167A	3.51422	SUMO3	5.21471	IFI6	3.9753	HDAC9	4.5901	FAM110C	5.01273	FAM102B	3.99936
212	C11orf1	3.51218	PTGER4	5.20949	MUM1L1	3.97193	C11orf74	4.58737	RASAL1	5.00819	CRYM	3.99753
213	SNTB1	3.51185	LRRC36	5.20538	SLC10A4	3.9716	TUBGCP4	4.58486	BORCS7	5.00546	F8	3.99746
214	LOC441052	3.51165	C11orf1	5.20452	SERPINF1	3.97031	TUBA4B	4.57483	SARDH	5.00248	CCNYL1	3.99356
215	CHST11	3.50834	ZMYND15	5.19847	SCN2A	3.97023	GPAT2	4.57049	LSM4	4.99943	ADCYAP1	3.99076
216	PTGER4	3.50733	CD84	5.19222	OPCML	3.96861	PANX1	4.57026	UBA52	4.99617	ATP6V0C	3.9896
217	C22orf39	3.50693	RHOJ	5.18633	STRAP	3.96699	SMIM12	4.56946	SMARCD3	4.99515	SLC10A4	3.98829
218	KLHL1	3.5057	TMEM106A	5.1716	PRKDC	3.96576	SLC35B1	4.56619	RIPOR2	4.99085	DOCK3	3.98165
219	NCF1C	3.50016	FAM117A	5.17104	JAZF1	3.96511	CDC40	4.56276	TFPT	4.98968	ARHGAP20	3.98146
220	PIANP	3.49988	RHBDF2	5.17047	RANGAP1	3.9642	TMEM70	4.56062	CYB5R1	4.98323	COL24A1	3.98
221	SYNPO	3.49551	CCNH	5.16264	YWHAB	3.96225	ACTN2	4.5583	ST6GALNAC5	4.98097	FNIP2	3.97914
222	FBXO17	3.49457	NDUFB1	5.14497	ARSJ	3.95748	CCNDBP1	4.54233	CDC42SE2	4.97993	LZTFL1	3.97619
223	PLB1	3.49157	PYCR1	5.14008	PEX11B	3.95372	PMPCB	4.54101	CHID1	4.97881	MAZ	3.97604
224	FGD4	3.48909	TSPAN4	5.13442	B3GNTL1	3.94887	EBNA1BP2	4.53806	MDGA1	4.97811	TMIE	3.97443
225	NABP1	3.48286	CORT	5.12979	BTRC	3.9478	TACO1	4.53745	PTER	4.97076	PLCL2	3.97289
226	LINGO3	3.48042	PON3	5.12561	PI4KA	3.94551	DNAJA1	4.53541	CMSS1	4.97053	RNF24	3.96344
227	HLA-DMB	3.47844	GNA12	5.12338	RAB11FIP1	3.94448	CREG2	4.53497	HRAS	4.96498	SNX10	3.9584
228	SLC4A11	3.47647	OTOF	5.11957	RTN4RL1	3.941	NEFL	4.52808	CPE	4.94664	ALG13	3.95761
229	PLPPR2	3.47466	DAPL1	5.11942	CREG2	3.93732	PSMD1	4.52785	TRIM27	4.94557	SLC35A2	3.95535
230	FBXL18	3.47464	CACNA1H	5.11856	LRRC14	3.93705	CCKBR	4.52641	ST6GALNAC6	4.94553	WIPF2	3.9525
231	PCBD2	3.47015	FCGR1B	5.11824	EIF2S1	3.93614	CA10	4.52619	ARMCX1	4.92654	TPK1	3.95182
232	ONECUT1	3.46905	FAM86C1	5.11316	TBPL1	3.93569	GNG3	4.52602	SKAP2	4.92463	HTR1E	3.95149
233	ARL16	3.46901	ACTG1	5.1108	LCN15	3.93205	ASGR2	4.52367	CETN2	4.9208	PGAM5	3.94896
234	AKR7L	3.46889	ADGRA3	5.10994	MCHR1	3.9303	PIH1D1	4.52111	GSTM3	4.91705	TDRKH	3.94483
235	CCDC191	3.46868	WIF1	5.10371	CCDC68	3.92344	SIRPA	4.52083	ACOT2	4.91702	PKD2L1	3.94371
236	NAT16	3.45892	SLC40A1	5.10193	WASF1	3.91675	DCTPP1	4.51922	FAM120AOS	4.91638	PPP1R12A	3.94078
237	RNF5P1	3.45862	THTPA	5.09766	PRSS3P2	3.91136	NETO2	4.51591	CA10	4.91444	UNC13A	3.93778
238	RHBDF2	3.45501	LOC100240735	5.08469	LRRK1	3.91067	RASGRF2	4.51452	C2orf69	4.91251	FOXRED2	3.93461
239	HTR1A	3.45499	C1QL1	5.0821	ME3	3.90063	NOS2	4.51382	DDA1	4.90324	TP53BP1	3.93119
240	GPR137B	3.45477	PTS	5.07817	CA4	3.89818	KHK	4.51336	KIRREL2	4.90309	LY86-AS1	3.93027
241	CD24	3.45363	EMP3	5.07503	CDH18	3.89544	CCNYL1	4.51233	MEIS3	4.90197	UMODL1-AS1	3.92745
242	GNA12	3.44783	C6orf52	5.07492	TYRO3	3.89421	POLR3K	4.50793	UG0898H09	4.9013	CHAF1B	3.92572
243	ADIRF	3.44527	CYB5D2	5.07412	CYP4X1	3.88992	VSTM2L	4.50574	STUM	4.89651	CNIH3	3.92406
244	MLEC	3.44367	TMSB4X	5.07182	LOC440300	3.88826	TOMM20	4.50416	TPST1	4.8929	ZER1	3.92267
245	DNAJA4	3.44312	EYA2	5.06668	TUBA4B	3.88731	DPP10-AS1	4.50228	C6orf52	4.88694	CLSTN1	3.92229
246	BRD7	3.44235	ADI1	5.06621	KIF17	3.88517	LSM11	4.50087	E2F3	4.8832	SPATS2	3.91808
247	FHOD1	3.43636	VIM	5.0632	DPP10	3.88327	RARA-AS1	4.49955	CEP170B	4.87959	CCDC110	3.91643
248	AQP5	3.4291	SLC44A3	5.06138	LOC441666	3.87432	LRRC73	4.49736	GABRA5	4.87835	ARNTL2	3.91511
249	ADGRV1	3.42706	C20orf27	5.05998	AGBL4	3.8728	TMEM132B	4.49598	TCEA3	4.87293	MAP4K3	3.91444
250	OPHN1	3.42588	SMAD2	5.0592	CLTC	3.86805	CUL9	4.49585	RTL8C	4.87104	NPAS2	3.91366
251	TSPAN4	3.42428	DCN	5.05793	LTK	3.86673	CIAO1	4.49481	CRIP2	4.86576	CCDC3	3.91238
252	AHCY	3.4227	CAPZB	5.0525	GALNT14	3.86414	CFAP52	4.49375	ADCY2	4.85967	ME3	3.91127
253	PNP	3.42132	MT1L	5.04914	SPRN	3.86265	COL24A1	4.49297	SPPL3	4.85552	OPCML	3.91036
254	PPP1R9B	3.42047	PLPPR2	5.04752	PRSS2	3.86003	CHL1	4.49177	B9D1	4.85456	SAE1	3.90935
255	SLC4A3	3.41283	GABBR1	5.04549	SYNGR3	3.85288	NTMT1	4.48491	NOV	4.84267	CLDN4	3.90833
256	THTPA	3.41258	LILRB4	5.04102	UCHL1	3.8472	ARPP19	4.48439	GABBR1	4.83748	KLHL25	3.90636
257	BLVRB	3.41231	MT1JP	5.03391	DGKA	3.84259	CCDC3	4.4833	NEBL-AS1	4.83109	CPNE8	3.90541
258	CISH	3.4105	WRB	5.03333	ENTPD6	3.83755	ARL8B	4.48182	MANEAL	4.82526	FLOT2	3.90509
259	CFAP44	3.40748	UQCR11	5.02719	CTC1	3.83713	RPGRIP1L	4.48136	BABAM2	4.82449	AACS	3.9041
260	ZCWPW2	3.40612	RPLP0P2	5.02562	POMGNT2	3.83444	ZNF202	4.47686	VPS37D	4.82021	MARK1	3.89647
261	FAM129B	3.40527	TMEM263	5.02428	GRASP	3.83326	MED8	4.46974	DNAJA1	4.81859	METAP1	3.89554
262	TMEM158	3.40132	PHPT1	5.01151	BSN	3.83313	GLCE	4.46889	NECAB2	4.81717	GULP1	3.88949
263	CHRNA3	3.39928	AK4	5.006	CFAP52	3.83117	PCDHAC2	4.46474	CPNE7	4.81283	YWHAG	3.88795
264	PAFAH1B3	3.39706	CMSS1	4.99942	YARS2	3.83079	RTN4RL1	4.46274	FAM171B	4.80923	PTPRO	3.88714
265	SNRPD3	3.39616	RAB31	4.99674	HS3ST2	3.82985	OPTN	4.45994	RAB35	4.80878	C2CD2L	3.88584
266	NPTXR	3.39427	EDNRB	4.99665	AP3M2	3.82343	MKL2	4.45991	WDR54	4.80633	GFOD2	3.88541
267	VBP1	3.3942	PSMG3-AS1	4.99578	TUBA3C	3.82085	RTP1	4.45581	SNRNP27	4.80502	RTN4R	3.88403
268	MYL12B	3.3923	UBE2L6	4.98052	ARHGEF25	3.81686	VPS16	4.45395	TMEM242	4.80235	SERPINF1	3.88117
269	MSN	3.38962	FABP5	4.97379	NDEL1	3.81539	DENND2D	4.4509	TKFC	4.80081	CA10	3.87859
270	LOC101060091	3.38703	DIO2	4.96602	DNAJB6	3.81337	ZNF184	4.45062	AQP4	4.80015	ITPKA	3.87702
271	KCTD10	3.38508	CFD	4.96275	BEX2	3.80983	SC5D	4.44746	PNPLA3	4.79376	EGR4	3.87617
272	ALKAL2	3.38496	GNG2	4.96236	NETO1	3.80823	RPUSD4	4.44598	NUDT18	4.78782	FAM220A	3.87216
273	PABPC3	3.38272	C12orf45	4.96133	FAM49A	3.80709	ALDOA	4.44253	LRRC42	4.77808	NDEL1	3.87076
274	HNMT	3.38157	BCAN	4.95243	FRMD6	3.80392	SYNGR1	4.44158	TBC1D13	4.77121	ZNF18	3.87004
275	LTBR	3.37506	IFI27L1	4.9468	B4GALT5	3.80253	RIT2	4.43874	NFKBIE	4.76935	CNTNAP2	3.86771
276	CCL19	3.37461	DNAH14	4.93794	NUDT4	3.79851	MAPK11	4.43813	SSTR2	4.76684	RALBP1	3.85805
277	UROS	3.36986	RGS10	4.93356	BRPF3	3.79506	UBE2E2	4.43672	OGG1	4.75912	USP6	3.85576
278	IRX5	3.3678	PIANP	4.92311	ARFIP2	3.79343	RXFP1	4.43617	TSEN34	4.75393	TMEM132B	3.85392
279	KIAA1191	3.36758	CD99	4.92243	P2RX5	3.79134	GALNT14	4.43539	CNTN1	4.74634	TASP1	3.85297
280	TIMP2	3.3675	SARDH	4.91136	DCP2	3.79001	XK	4.43538	ASS1	4.74118	SGTB	3.85133
281	GDPD2	3.3652	SOWAHD	4.91067	DPYSL4	3.7871	WNT7A	4.42752	SLA	4.73797	ARFIP2	3.84997
282	TUB	3.3642	VKORC1L1	4.90554	TBL1XR1	3.78607	SURF4	4.42556	LINC00260	4.73758	EXOC6	3.84846
283	PYDC1	3.36104	IGFN1	4.90146	NELL1	3.78509	C12orf43	4.42096	DOC2B	4.73701	FBXO34	3.8475
284	MNDA	3.35928	SNRNP27	4.89823	ARHGAP20	3.78449	RAD23B	4.41704	GBA	4.7349	CCKBR	3.84503
285	PARVB	3.35906	LSM3	4.89645	UPK3A	3.78373	SMAP2	4.4139	HTR7	4.73426	NAA30	3.84295
286	DRAIC	3.35864	PINLYP	4.8951	ZNF202	3.78311	OLA1	4.41354	NABP1	4.73368	CDH10	3.84146
287	GRB2	3.35652	FBXO2	4.89372	RGS4	3.78233	DDX1	4.4123	CTC1	4.73143	FLJ20021	3.84138
288	CPE	3.35499	MSN	4.89351	CLTA	3.78193	MCHR1	4.40574	LRRC3B	4.72999	HS6ST1	3.84117
289	FAM126A	3.34726	FAM149A	4.89032	C19orf12	3.78052	PPP2R2A	4.40426	CD63	4.72864	DRD4	3.8392
290	CPNE3	3.3463	TNNT1	4.889	PFN2	3.77944	GPX3	4.40398	DDB1	4.72593	FOXG1	3.83867
291	UBAP2	3.34193	BORCS7	4.88815	SLC35B1	3.77741	TUBA4A	4.40397	SLC35A2	4.72347	EARS2	3.83801
292	PBX4	3.33785	RANBP3L	4.88722	DUSP5P1	3.77732	APBB1	4.40355	ARMCX2	4.72244	GPR22	3.83797
293	CD86	3.33404	GTPBP3	4.88276	CDC34	3.77716	CDC6	4.40286	PRAF2	4.7194	DENND3	3.83715
294	DAP	3.33375	PPP2CB	4.87951	WAC-AS1	3.77609	PDHA1	4.40286	PRSS35	4.71936	TNFSF13B	3.83682
295	DERL3	3.33348	BPHL	4.87606	NPTX2	3.77467	AP3M2	4.40214	HTR7P1	4.71627	LRFN2	3.83639
296	CYBB	3.33245	PLAC9	4.87381	SELENOH	3.77401	PNMA8B	4.39511	CACUL1	4.71399	CACNG6	3.83444
297	SEC63	3.32742	DIAPH3	4.87363	STYK1	3.77399	COL5A2	4.3946	LINC00982	4.70382	POLG	3.83399
298	HCLS1	3.32594	TIMP1	4.87278	MFSD4A	3.77077	UBC	4.38515	NHLRC1	4.70337	SLC22A18	3.83274
299	LARP1	3.32503	LRMDA	4.87108	NCKAP1	3.76981	AP2M1	4.38394	STYK1	4.70301	TRAPPC9	3.82886
300	DAPL1	3.32399	ACOT2	4.86874	ATP9A	3.76575	CRLF1	4.38363	BEX3	4.69008	TMEM243	3.82449
301	SYTL5	3.3192	TMEM100	4.86795	FAIM2	3.76564	RAB3C	4.38282	DPYSL3	4.68946	STOML1	3.8242
302	NDN	3.31693	MT1A	4.86632	TMEM177	3.75729	LOC440040	4.38024	C1orf50	4.6834	NUDT9P1	3.82284
303	SF3B3	3.31627	MYL12B	4.86075	ARTN	3.757	CLTC	4.37574	ARHGAP28	4.67696	GSS	3.8224
304	CPVL	3.31394	TMEM158	4.85823	RTN4RL2	3.75676	TP53TG3D	4.37403	ADRA2C	4.67595	FAM187A	3.82072
305	SEC23IP	3.31226	LARP1	4.85732	SKAP2	3.75084	GRASP	4.37335	PCED1B	4.67562	LRRC2	3.8197
306	NSG2	3.30829	PPCS	4.8533	FTCD	3.74923	PIP4P1	4.37195	ZMAT2	4.67429	DGKB	3.80893
307	LINC02482	3.30574	MGMT	4.85213	MAL2	3.7453	TCEA2	4.36883	LRRC36	4.67215	WSB2	3.80375
308	DNAH12	3.30306	FZD1	4.84627	TTPAL	3.74434	ADTRP	4.36473	BEX1	4.67022	A1BG-AS1	3.80152
309	VSIR	3.29407	ACADL	4.84616	CHSY3	3.73307	EIF2S1	4.36396	FABP7	4.66875	DPP10	3.8
310	PLCG2	3.29031	MORN5	4.84481	PANK2	3.7318	C16orf91	4.36232	DKK3	4.66685	ST6GALNAC5	3.79722
311	UBE2A	3.2902	MT1B	4.84137	DPF1	3.73008	CA4	4.36186	SP5	4.66617	SERPINI2	3.7958
312	CDKN1A	3.288	LOC100288911	4.83917	MKL2	3.72937	SELENOH	4.36161	TMEM17	4.66607	SMIM24	3.7951
313	CIDEB	3.28756	SLA	4.83357	KCNIP4	3.72915	NCBP2-AS2	4.35574	WFDC1	4.66432	SYT13	3.79398
314	DAP3	3.28697	CARD17	4.83057	NUDT18	3.72485	WDR7	4.35043	LINC02482	4.66098	LRRC14	3.78946
315	MYO16	3.28679	PRDX4	4.83001	EXD3	3.7246	GEMIN6	4.34807	MUM1L1	4.66089	NDC1	3.7867
316	CAMKV	3.28617	UBE2L5	4.82894	TSHZ2	3.7226	CIDEA	4.34734	NKAIN3	4.65869	VPS35	3.78565
317	ATP8A2	3.28537	INHBB	4.82703	INCENP	3.7223	ADCYAP1	4.3472	SIRT3	4.65614	CLTC	3.7818
318	SPATA33	3.28465	NECTIN2	4.82444	IMMT	3.72192	LCN15	4.34212	COG1	4.6553	CCNA1	3.78109
319	CCDC171	3.28453	PEX10	4.82381	TPBG	3.71779	CHRM3	4.34153	BTBD9	4.64569	TUBA4A	3.77801
320	NRP2	3.28279	SLC16A2	4.8196	PPFIBP1	3.71243	MED31	4.34097	RHBDD2	4.64431	PRKAR1B	3.77697
321	CCDC148	3.27844	PLCG2	4.80556	C5orf30	3.71136	LRRTM4	4.33819	SRSF12	4.64199	FAM117B	3.77581
322	MAP1LC3A	3.27827	SULF2	4.80237	CACNB1	3.70802	CCT7	4.33704	GNB4	4.64118	BSN	3.77466
323	RAP1GAP	3.27819	TRAPPC2L	4.79882	CACNG6	3.70781	SLITRK5	4.3351	JPT1	4.63975	BRPF3	3.77396
324	DAB2	3.27803	LY86	4.79509	AKAP8	3.7024	NABP2	4.33131	CDH8	4.63907	E2F3	3.77276
325	HIST1H2BK	3.2727	PPP5D1	4.79387	ARPP19	3.69917	KLHL2	4.33105	LRRN2	4.63797	GLRA3	3.76934
326	WASHC3	3.27265	LYPLAL1	4.7938	TSPAN17	3.69883	LOC440300	4.32671	BPHL	4.6366	RTN4RL1	3.76607
327	YPEL1	3.27107	STAB1	4.7924	PHF24	3.69833	ATXN7L3	4.32669	RILPL2	4.63577	SUV39H1	3.76555
328	PHLDB3	3.27024	ADGRG1	4.79223	DOC2A	3.69678	PDZD2	4.3259	NKD2	4.63363	TSN	3.7633
329	CMTM7	3.26715	EGLN1	4.79078	CABYR	3.69349	SGTB	4.32576	GRIA1	4.63352	DZIP3	3.75984
330	MLLT1	3.2658	PLPP4	4.79069	GGA3	3.69073	LGALS1	4.32364	MYH7	4.63262	SYT5	3.75968
331	CCDC8	3.26391	PPP4R4	4.77995	CDH8	3.6898	MRPL4	4.32185	KCNMB4	4.63017	SGPP1	3.75941
332	CAVIN3	3.26258	AQP4	4.77859	KLF10	3.68861	FITM2	4.31362	WTIP	4.62859	RASGRF2	3.7527
333	C9orf16	3.2579	ARHGDIA	4.77283	TDRKH	3.68502	IARS	4.31169	MAFG	4.62632	NMT2	3.75223
334	PLPPR5	3.25719	CD33	4.77252	GABRB3	3.68345	FGFR1OP2	4.31074	PSD3	4.62413	FAM241B	3.75057
335	GTF3C6	3.25464	ACP1	4.7721	SAE1	3.68322	SLC35A2	4.30743	CFAP52	4.62375	C11orf87	3.75054
336	LRRC3B	3.25321	LPAR6	4.76815	RASL11B	3.68096	GHITM	4.30612	EPOP	4.62131	DRC1	3.7471
337	RPN2	3.2518	LINC02076	4.76532	BEX3	3.67966	NMT2	4.30262	DENND1A	4.62114	ITFG1	3.74562
338	MGC70870	3.24845	GNG12	4.76446	SNX10	3.67722	GAST	4.30112	LGI4	4.61972	PEX5	3.74554
339	HEYL	3.24774	TMED10P1	4.75966	TOLLIP	3.67668	TYRP1	4.29916	TBC1D24	4.60937	SOWAHB	3.74516
340	SLA	3.24696	PEA15	4.75856	KIAA1549L	3.67413	ANKRD28	4.29788	STK17A	4.60876	CLSTN3	3.74507
341	RPS8	3.24626	DCTD	4.75628	SLC39A10	3.67381	THY1	4.29739	CMAS	4.60782	CHSY3	3.74431
342	PLEKHG4B	3.24551	GPC5	4.75594	UBE3D	3.67196	PRNP	4.29257	DLK2	4.59975	MRPL44	3.74322
343	ALOX5	3.23945	BAG3	4.75363	ADGRF5	3.67146	TERF2	4.29208	LOC285097	4.59838	DEDD2	3.74196
344	ARHGAP5-AS1	3.23816	CCDC153	4.74921	MEDAG	3.67046	GRSF1	4.28915	TMSB4X	4.59285	KCNJ12	3.74172
345	UCHL3	3.23657	SEMA4A	4.7342	LRRTM4	3.67043	TUBB4B	4.28161	ICAM5	4.59141	EHBP1L1	3.74108
346	PCYT1B	3.23605	LST1	4.73277	RFTN1	3.66206	DOCK3	4.28122	DPF1	4.59115	MANBAL	3.74078
347	RPLP0P2	3.23556	SARNP	4.72871	FBXL2	3.66117	DPF1	4.27786	TM2D3	4.58692	SH3KBP1	3.74029
348	HLA-H	3.2329	LOC645166	4.72714	MADD	3.66074	YTHDF2	4.27672	SMAD2	4.58604	PIGQ	3.73633
349	WDFY4	3.23284	CHCHD6	4.71989	CCDC110	3.65941	OSTF1	4.27643	YTHDF2	4.58412	SH3BGRL2	3.73574
350	LYRM9	3.23267	TCEA3	4.71692	LCLAT1	3.65439	DGKB	4.27575	HIST1H2BK	4.58252	CNNM4	3.73482
351	ZWINT	3.22865	AIF1	4.71293	HTR1E	3.65314	CACNB1	4.2754	MYADM	4.58051	PLEKHG5	3.73395
352	DLGAP3	3.22702	EMID1	4.70628	CAMK1G	3.64717	SPRN	4.27033	ACP1	4.57658	PNLDC1	3.73011
353	RHOC	3.22572	HIF3A	4.70057	C16orf58	3.64716	TUBA3C	4.26992	ANKRD6	4.57525	SLC8A2	3.73004
354	AGAP3	3.22556	PIFO	4.69929	VCPKMT	3.64632	LPL	4.26466	NBDY	4.57494	CDK20	3.72994
355	CBX6	3.22476	ARHGEF40	4.69079	YIPF1	3.64464	HEMK1	4.26111	RTL8A	4.57467	COL23A1	3.72639
356	DIAPH2	3.22435	RAP2B	4.69079	ZNF329	3.64045	GOLPH3L	4.25941	PSORS1C1	4.57313	DNM1	3.72505
357	ANXA2	3.22426	DIRC2	4.68929	NPY1R	3.63712	TM6SF1	4.25526	DACH2	4.56729	TMEM150C	3.72087
358	TRIM71	3.22421	ALOX5AP	4.68672	PITPNB	3.63708	TPI1P2	4.25094	NIPSNAP1	4.5637	C19orf47	3.72078
359	TRIM17	3.22169	S100A10	4.68241	GUCY1B1	3.63647	ASXL3	4.24567	RXRA	4.56268	KRT83	3.71913
360	CCDC6	3.22168	TMEM219	4.68075	FILIP1L	3.63267	TMEM59L	4.24143	NOL9	4.56243	PRKDC	3.71897
361	RIIAD1	3.22137	CHRNB1	4.67913	LOC644189	3.6321	PIN1P1	4.23956	SLC26A11	4.56048	DCUN1D3	3.7152
362	NUMBL	3.22076	LYRM9	4.67589	WDR17	3.63081	RNF128	4.23823	UHMK1	4.55958	PPEF1	3.70751
363	IGFN1	3.22032	SLC2A10	4.67461	FLOT2	3.62859	LRRK1	4.23796	PXMP4	4.55749	CAND2	3.70329
364	TOX3	3.2196	GPC4	4.67405	LINGO1	3.62752	SLC4A1AP	4.23763	HBQ1	4.55701	TNFRSF11A	3.70065
365	CMTM3	3.21701	ITGB7	4.67219	BYSL	3.62199	ANKRD34A	4.23677	MESP1	4.54705	PRR3	3.69796
366	RAC2	3.21297	CNPY2	4.67138	LSM11	3.62041	CLSTN3	4.23218	MARCKS	4.54682	TNPO2	3.69661
367	LINC01094	3.21224	AKR7A3	4.66936	GRIPAP1	3.62037	VPS35	4.228	TCTA	4.5455	COL5A2	3.69465
368	MSH3	3.21163	ITGB2	4.6677	PEBP1	3.62012	METTL13	4.22744	ELFN2	4.54493	ARL15	3.69457
369	MATN2	3.20474	PIGF	4.66116	PDZD2	3.61892	METTL21A	4.22522	ZNF350	4.54401	TM7SF2	3.69375
370	JPT1	3.20212	NT5DC3	4.65813	PTPA	3.61703	CDC42SE2	4.225	RRP7A	4.54314	TRIM11	3.68755
371	PVT1	3.20017	ARFGEF3	4.65655	CIAO1	3.61605	FTCD	4.22245	HSP90B1	4.5406	NRXN1	3.68655
372	IL34	3.1995	TMSB10	4.65135	PSMC1	3.61327	TEX29	4.21924	SLC26A4	4.53911	GOLPH3L	3.68426
373	THBS4	3.19673	ALK	4.64879	ZNF554	3.60465	AHSG	4.21442	KCNN3	4.53772	FLJ33534	3.67952
374	AP5S1	3.19481	PCBD1	4.64661	TRUB1	3.60216	ABHD12B	4.21231	ACOT8	4.53246	SNTB2	3.67605
375	HLA-DRB3	3.19426	RRP7A	4.63544	DYNC1I1	3.6018	C1D	4.20914	SLN	4.53186	SEMA4F	3.6716
376	SAT1	3.19394	SQOR	4.63361	KANSL3	3.6004	ABHD16A	4.2088	CENPP	4.53173	PANX1	3.66978
377	IZUMO4	3.19271	CNR1	4.63343	CDIP1	3.59932	GALNT17	4.20551	NEDD4L	4.52994	SYP	3.66962
378	RRAGB	3.1885	LOC101060091	4.63176	PRNP	3.59556	NECAB1	4.20449	AK4	4.52457	CD53	3.6663
379	SLIT3	3.18723	FAM171B	4.63059	HERC1	3.59529	ARFIP2	4.20214	IDNK	4.52299	MIR7-3HG	3.6629
380	SRR	3.18504	EIF1	4.62653	MRPL28	3.59349	RAPGEF2	4.19393	PJA1	4.52151	NTRK2	3.66228
381	SDC3	3.1837	NBDY	4.62542	VSTM2L	3.59288	CPNE8	4.19369	FGF2	4.52097	FREM3	3.65873
382	CA12	3.17911	C5orf49	4.62387	YEATS2	3.59129	TMEM183A	4.19347	ME3	4.51979	SYNGR3	3.65762
383	UFM1	3.17523	PPP2R5C	4.62214	UBC	3.59015	NWD2	4.19319	SPATA33	4.51284	PACS1	3.65682
384	SPARC	3.17468	RSU1	4.61935	WIPI2	3.58452	HSF2	4.19275	CNIH2	4.51277	CEP126	3.65574
385	NME4	3.17358	LIN7B	4.61748	WDR26	3.58443	BEX3	4.18516	DHX58	4.51077	PART1	3.65572
386	ANAPC13	3.17056	FCGBP	4.61709	PRKAR2B	3.58423	COL11A1	4.18513	MYRIP	4.51047	KCNAB1	3.65423
387	CGNL1	3.16883	CILP2	4.61573	RNF24	3.58414	ZNF215	4.18401	FDPS	4.50805	DMXL2	3.65291
388	EIF3H	3.16807	KIRREL2	4.61435	CD83	3.58289	DAGLB	4.1839	MAPK8IP1P2	4.5047	DGKI	3.65287
389	GLUD2	3.16775	SLC25A18	4.61432	ENC1	3.5796	HSPA12B	4.18217	CDO1	4.50323	CCNL2	3.65265
390	HTRA3	3.16736	ALOX5	4.60917	FRAS1	3.57825	KLF10	4.17774	SCARA5	4.50029	NCOA7	3.65156
391	GSTM2P1	3.16553	LDHD	4.60806	DTX4	3.57693	RFTN1	4.17365	PPEF1	4.49807	TNKS2	3.65138
392	CYTOR	3.16532	MACROD2	4.6056	TYRP1	3.57458	CCK	4.17307	ZNF469	4.49792	PI4KAP2	3.65113
393	TMEM17	3.16528	HBG1	4.60558	SIRPA	3.57443	TPK1	4.1723	KLHDC8B	4.4961	BYSL	3.64873
394	HCG23	3.16176	TMEM159	4.60046	NPAS2	3.57419	TPST1	4.17182	FADS2	4.49416	EXT1	3.64806
395	TMEM136	3.15972	C3orf14	4.59958	PP12613	3.57294	LOC105378853	4.17051	EFEMP1	4.49074	USP46	3.64754
396	BRD7P3	3.15883	ADGRV1	4.59817	MEI1	3.57238	ADGRF5	4.17004	MAPK3	4.48721	CCAR2	3.64622
397	CSPG4	3.15686	GSTM1	4.59714	LOC105378853	3.56871	HPS6	4.16943	SFTPD	4.48495	TATDN2	3.64331
398	SDS	3.15666	RHOC	4.59616	CLPTM1L	3.56624	CRH	4.16792	ANK3	4.48386	PPP2CA	3.64298
399	CCDC189	3.155	SLC16A9	4.59611	BAIAP2L2	3.56557	SLCO2A1	4.16689	PRKCG	4.48103	LOC105379807	3.63853
400	CTSS	3.15203	NKAIN4	4.59496	DPAGT1	3.56484	SCO2	4.16675	WFS1	4.47989	SIRPA	3.63747
401	LOC101927318	3.15132	TMEM17	4.59396	THRB	3.55975	BORCS5	4.16485	TNIK	4.4792	BAIAP2L2	3.63742
402	LIN7B	3.15102	BRD7	4.5911	PWWP2B	3.5583	SPCS3	4.16346	IL33	4.47875	NEUROD2	3.63464
403	ICAM3	3.15094	RIDA	4.59107	PLXNA1	3.55719	KCNT2	4.16176	OPRM1	4.47843	SURF4	3.63347
404	MYBPH	3.1494	ENO1	4.5899	SLC22A18	3.55613	VGF	4.16112	CKS1B	4.4637	TEX29	3.63014
405	BEX4	3.14794	KLHL1	4.58828	RMI2	3.55569	POP7	4.16057	NAGK	4.46356	INCENP	3.62835
406	MIR4435-2HG	3.14505	SHISA5	4.58631	PDE1B	3.55405	MAL2	4.15883	ROBO1	4.45876	EGFL7	3.62644
407	CELF3	3.14284	IGDCC4	4.58545	ANKRD34A	3.55369	UBE3D	4.15254	FBXL16	4.45413	RABEP1	3.62537
408	RPS17	3.13704	ETFDH	4.58429	CLSTN3	3.55276	DZIP3	4.15071	SST	4.45266	NMT1	3.62493
409	METTL7A	3.13682	TKFC	4.57709	MED12L	3.55053	BEX2	4.14699	ZNF226	4.44595	WAC-AS1	3.61964
410	ELP4	3.1364	ST6GALNAC6	4.57576	PTPRO	3.54997	CACNB2	4.14588	NTSR1	4.44583	TSPAN5	3.6188
411	FAM171B	3.13438	HTR7	4.57463	EXOC6	3.54759	PNMA1	4.14434	SLC7A4	4.44245	RAPH1	3.61143
412	BBS4	3.13298	CHCHD5	4.57374	RTL10	3.54705	CCDC68	4.14404	APMAP	4.44166	LAMB1	3.61112
413	ZC3HAV1	3.13171	SAMD9	4.57265	RALBP1	3.54685	MCOLN1	4.14377	SYN2	4.44066	CAMK4	3.61075
414	MED24	3.129	TMEM238	4.57176	STX1A	3.543	ARSJ	4.14085	GABRG1	4.43716	PABPC1L2A	3.6081
415	VTI1B	3.12367	CC2D2B	4.56627	BEX1	3.54234	CTXN2	4.14063	RANBP3L	4.43416	KRAS	3.60676
416	PPP1R18	3.12317	PCDH15	4.56519	SERPINI1	3.54181	TPX2	4.14053	PSMB7	4.43405	NEURL1	3.60182
417	ZDHHC15	3.1217	KCNE4	4.56083	SPICE1	3.54162	SCG5	4.13922	C1R	4.43364	PRKCZ	3.60163
418	USP46	3.12141	ANTXR1	4.56073	ACTN2	3.54005	SNX17	4.13852	CXorf57	4.42583	NOV	3.60097
419	PSMG3-AS1	3.12121	CARD16	4.56005	NLK	3.53976	ATXN7L3B	4.13458	PPM1M	4.41991	C9orf40	3.60005
420	CCDC85C	3.11948	UCHL3	4.55984	FSD1	3.53802	CAND2	4.13286	CACNG3	4.41734	LINC00507	3.60004
421	DLGAP4	3.1184	ERI3	4.55405	NAPB	3.53652	PSMC1	4.12879	P2RX5	4.41659	LINC01116	3.59972
422	HLA-DRB5	3.11766	FKBP1B	4.55223	AKT3	3.53623	COPS7A	4.12787	GLRA2	4.41643	LY6E	3.59684
423	IFT74	3.11616	SAMD15	4.55002	RAPGEF2	3.53574	TOLLIP	4.12702	PPIL6	4.41511	EXTL3	3.59343
424	POLR2A	3.11613	CAPG	4.54374	OSTF1	3.53524	MYH10	4.12495	RASGEF1C	4.41444	FAM162B	3.58896
425	HLA-DRA	3.11463	LOC642852	4.543	BASP1	3.5336	MED27	4.1248	TIMM10	4.4113	FAM174B	3.58834
426	TMEM176B	3.1121	ZNF880	4.54118	NOS2	3.53358	CDIPT	4.12145	IGF1	4.40814	C19orf12	3.58637
427	NUPR2	3.11141	NR2E1	4.54086	SLITRK5	3.53299	STARD4	4.1176	FZD1	4.40156	CRTC1	3.58218
428	NUPR1	3.11094	GMFB	4.53954	LRRC20	3.531	DUSP28	4.11473	GNG4	4.39739	HS6ST3	3.57881
429	ZDHHC12	3.11038	LOXL1	4.53546	PIN1P1	3.52791	BEX5	4.11368	RNF11	4.3928	GALNTL5	3.57861
430	NFIB	3.10872	VSIG10L	4.53383	SNAPC5	3.52551	RANBP2	4.11362	TSTD1	4.38818	WAC	3.57664
431	LOH12CR2	3.10728	CREB3	4.52558	PGAM5	3.52258	SPON2	4.11358	SPRED1	4.38678	NICN1	3.57347
432	MUC4	3.1069	THRA	4.52483	SMIM12	3.52126	VPS25	4.11129	CERS1	4.38425	SAP30BP	3.57213
433	DNER	3.10566	GAR1	4.5245	PRKAA2	3.5195	TMEM205	4.10645	SRM	4.38247	TUBA1B	3.57098
434	KCNK2	3.10559	DCUN1D5	4.52006	BEND5	3.51191	B3GNTL1	4.10574	SHISA9	4.37964	CAPN12	3.57053
435	RPL21	3.10538	PPP1R1A	4.51827	NEFL	3.51073	PCDH10	4.10533	DLG2	4.37862	FGFR1OP2	3.56766
436	STK31	3.10262	RPL10A	4.51674	NEDD4L	3.50853	BRF2	4.10426	RAB3C	4.37613	ADGRB2	3.56718
437	PRKRIP1	3.10055	COPS4	4.51523	DEDD2	3.50445	PPP3CB	4.1011	ZCCHC18	4.37276	YPEL5	3.5602
438	COPZ2	3.09981	LRRC3B	4.51515	NWD2	3.50329	DCTN2	4.10048	ERICH6-AS1	4.37019	SLX4	3.55944
439	MLF1	3.09789	PDLIM5	4.51384	VCL	3.50064	RAB15	4.09799	LOC101927027	4.36989	CLPTM1L	3.55833
440	FAM181A	3.09693	SSPN	4.51243	TSTA3	3.49907	OVOL2	4.09338	GPR68	4.36869	IL27RA	3.55507
441	BCHE	3.09661	SH3BGR	4.51052	TWIST1	3.49642	NDUFV1	4.09048	ASH2L	4.36834	VAPB	3.55499
442	DCN	3.09554	PLEKHG4B	4.5096	LRRC2	3.49409	TMEM243	4.09017	LSM3	4.36669	JAZF1	3.55331
443	OXCT1	3.0916	SEC63	4.5038	FAM160B1	3.49344	CBLN2	4.08835	HPCAL1	4.36556	GRB14	3.55039
444	MEGF11	3.09083	TBXT	4.50299	DNAJA1	3.48933	ITFG1	4.08685	TXN	4.36506	C1orf115	3.54925
445	LGR4	3.09064	MOV10	4.50169	LAMB3	3.48787	PP12613	4.08466	NKAIN4	4.36355	PPFIBP1	3.54891
446	SOWAHA	3.08776	FABP7	4.50021	MIR7-3HG	3.48783	WDR47	4.08214	CCDC148	4.35886	CTC1	3.54779
447	GPR88	3.07935	PRKCD	4.49948	FAM174B	3.48696	EXD3	4.08025	C5orf49	4.35777	TMEM39B	3.54611
448	EPCAM	3.07893	MYL6	4.49626	CLSTN1	3.48688	PPP2CA	4.07427	ZNF436	4.35234	TIMM29	3.54526
449	THSD1	3.07806	LOC440934	4.48975	RASGRF2	3.48608	CMAHP	4.07076	YWHAH	4.35194	CDH18	3.54506
450	SLC2A10	3.07451	ZCCHC17	4.48954	CAMLG	3.48554	GRINA	4.0693	LOC441052	4.35062	ANO3	3.54506
451	C16orf74	3.07439	TNFAIP2	4.48735	ADAMTS8	3.48384	IFIT1	4.06857	SH3BGRL3	4.33822	ZBBX	3.54478
452	POR	3.0738	FAM71F1	4.48578	TMEM132B	3.48322	POMGNT2	4.06647	ATXN10	4.33742	SPACA9	3.54332
453	NQO1	3.07236	PSMB7	4.48375	CSPG4P1Y	3.48219	MIR100HG	4.06217	SH2D5	4.32505	SLC25A46	3.54262
454	ALK	3.07228	ARPC3	4.48327	PKP3	3.48138	MIR7-3HG	4.06097	PRMT2	4.32463	CYP2E1	3.53907
455	OGG1	3.07213	APBB1IP	4.47863	SURF4	3.48059	SNX32	4.06073	MORN4	4.32436	NKAIN1	3.53776
456	SAMD9	3.07204	PAXIP1-AS2	4.47732	LINC00839	3.48057	LCMT1	4.05948	PTHLH	4.32313	TMEM53	3.53749
457	ELK1	3.07075	PTGER3	4.47485	BTBD1	3.48025	FNIP2	4.05368	CHMP1A	4.32125	RMI2	3.53697
458	FYN	3.06709	ZNF277	4.47372	PNMA1	3.47556	MTCH1	4.04884	IGFBP5	4.318	KCNQ3	3.53645
459	ZCCHC17	3.06588	CMTM3	4.4698	TMEM39B	3.47368	CAPNS1	4.04437	WIZ	4.31791	VSTM2L	3.5357
460	PAXIP1-AS2	3.06538	RNF181	4.46453	DNM1P35	3.47262	C1orf74	4.03926	DPP10-AS1	4.31686	HERC1	3.53536
461	HTR2C	3.0642	DLG2	4.45862	LMO4	3.47036	DNM3	4.03897	GSTO2	4.31545	FAM13A	3.53201
462	RPL6	3.06276	STK17B	4.45667	ATP6V1G2	3.46971	PIP4K2C	4.03896	RASL11B	4.31458	IQSEC2	3.5312
463	ALDH1L1	3.06168	CSTB	4.4559	ATXN7L3B	3.46884	TNFAIP8L1	4.03888	LOC729970	4.3139	CDC6	3.53105
464	MRPL13	3.06065	MOCS2	4.45553	AMBRA1	3.46875	EPOP	4.03415	C22orf39	4.30933	TMEM65	3.52835
465	CENPU	3.05958	LINC01485	4.45545	CHRM3	3.46564	SHC2	4.03343	GOLM1	4.30736	EPHA4	3.52429
466	COMP	3.05765	BCHE	4.4546	ARL8B	3.46348	GRIA3	4.03323	DNAH14	4.30683	GRIPAP1	3.52253
467	ERC2	3.05707	ME1	4.45228	SLC25A14	3.46054	WDR26	4.02816	LOC100507516	4.30631	C9orf129	3.52134
468	USP18	3.05521	TNFAIP8L2	4.44555	GRM1	3.45527	ZNF429	4.02567	LINC02361	4.3038	ZBTB24	3.5187
469	FGGY	3.05464	FTL	4.4449	RAB9B	3.45371	CCDC85A	4.02411	ACTR1A	4.29981	NELL2	3.5171
470	CPSF4	3.05303	PRDX1	4.44106	ASH2L	3.45362	FLOT2	4.02259	SEMA4F	4.29868	MAGEE1	3.51596
471	NIPSNAP3A	3.05152	DPCD	4.4387	CLDN4	3.45338	NBAS	4.02077	RSPH9	4.29536	ARHGAP29	3.5153
472	FCGR3A	3.04971	FBLN2	4.43356	ZER1	3.45103	IL1RAPL2	4.01799	BEX2	4.29531	ADTRP	3.51496
473	EDARADD	3.04867	SYT17	4.43329	TUBGCP4	3.44679	ENO2	4.01483	SLC25A22	4.28812	KCNIP4	3.51166
474	PLP2	3.04718	ALDH1L1	4.43147	CCK	3.44586	AURKAIP1	4.0135	COG5	4.28393	HTR5A	3.51078
475	RBFA	3.04649	SELENBP1	4.43085	SNAP47	3.44554	GPR150	4.00904	CANX	4.28043	CHD5	3.51052
476	MMD	3.04487	TIMM10	4.43074	NHLRC1	3.4446	GGA3	4.0089	SARNP	4.27979	IQCJ	3.5102
477	PBXIP1	3.04472	FGFBP3	4.42933	ENO2	3.44229	GBAP1	4.00075	DNAH5	4.27932	PRDM10	3.50556
478	ZC3H15	3.0436	SRRD	4.42514	MAST3	3.43965	CDH18	4.00022	GPC4	4.27777	MPRIP	3.50427
479	EEF1B2	3.04223	ATP5ME	4.42504	FREM3	3.43959	TOMM40L	3.99838	MRPL30	4.27263	KLHDC9	3.50411
480	PTPRR	3.04089	GOLM1	4.42182	ADRA1D	3.43925	MBD1	3.9978	KLK7	4.26927	PGM2L1	3.50234
481	OTOS	3.03849	C6orf118	4.42	PIP4K2C	3.43841	MED12L	3.99644	ANOS1	4.26752	DBT	3.49982
482	PABPC1L	3.03659	ICAM3	4.41788	FKBP1A	3.43831	KCNJ4	3.99634	TMTC1	4.26443	FAM210A	3.49532
483	SREBF2	3.03394	P2RY13	4.4126	TRMT10C	3.43703	A1BG-AS1	3.9944	PRSS23	4.26221	ARHGEF3	3.4946
484	SNCG	3.033	PAMR1	4.41175	SGTB	3.43683	NELL1	3.99311	DAPL1	4.25991	MIR100HG	3.48973
485	GNAL	3.03025	MID1	4.41086	ZNF18	3.43523	KAT7	3.99182	PLXNA1	4.2573	FHL2	3.48867
486	PID1	3.02662	TYROBP	4.40486	NPPA	3.4349	LOC729930	3.99063	ADRA1B	4.25683	FARSA	3.48593
487	KCTD4	3.02646	DDAH1	4.40133	PCLO	3.43044	E2F3	3.99051	CCDC189	4.25297	DYRK2	3.48223
488	KCNQ2	3.02015	METTL5	4.40098	DBT	3.42442	MPND	3.98924	SELENOW	4.25239	TXLNB	3.47944
489	TDRD9	3.01837	PRSS35	4.39785	RMND1	3.42299	UCHL1	3.98751	PUSL1	4.25236	THOP1	3.47852
490	SCPEP1	3.01099	SCPEP1	4.39462	IQCJ	3.42274	COMMD7	3.98622	LOC101927420	4.25063	USP21	3.47771
491	RAB3B	3.00906	FAM86FP	4.39358	UNC13A	3.4222	ADCY2	3.98558	KCTD6	4.24081	RANBP9	3.47281
492	PYGO1	3.00842	LCTL	4.39207	PRPH2	3.42103	KLHDC3	3.98526	NIPSNAP3A	4.24	TMTC3	3.47269
493	ASCC3	3.00563	GLI3	4.39066	CALHM1	3.41847	BASP1	3.98396	ST5	4.23687	STMN3	3.47168
494	NOL9	3.00541	C10orf105	4.38525	KHK	3.41714	C1S	3.98184	ETNPPL	4.23318	GPAT2	3.47058
495	IMPACT	3.00338	ACSBG1	4.38312	GAST	3.4114	CNNM4	3.98163	ALK	4.23259	LINGO1	3.47057
496	EPHA6	3.00225	TRAF3IP3	4.38263	PDS5A	3.4111	FAM122A	3.97623	MAN1A1	4.22809	TTLL12	3.46886
497	PPP1R16A	3.00043	SMIM29	4.38165	IL1RAPL2	3.41096	STRAP	3.97576	MYL5	4.22706	CRLF3	3.4684
498	ZCCHC18	2.99995	IARS2	4.38164	PCMT1	3.40905	PART1	3.97234	CRYM	4.21686	RARA-AS1	3.46621
499	LANCL2	2.99811	MAP1LC3A	4.37444	PSMA6	3.40781	DENND3	3.97001	MGST1	4.21225	METTL21A	3.46412
500	CXADR	2.99761	RPLP0	4.37387	STMN2	3.40656	POLR2H	3.96464	NDUFAF8	4.2086	ENSA	3.46333
501	ARHGDIA	2.99692	FAM229B	4.37068	RITA1	3.40561	RASL11B	3.95961	DR1	4.20578	PIP4K2B	3.46104
502	BEND7	2.99663	NAA10	4.37052	CRLF1	3.40496	CABYR	3.9595	PLCB2	4.19991	LDB2	3.46091
503	PIPOX	2.99361	PCED1B	4.37014	MAPK9	3.40457	ZNF239	3.95684	UNC5B-AS1	4.1938	ANKRD13C	3.45687
504	ENDOU	2.99349	GPR179	4.36614	PTGES	3.40441	CALM2	3.95339	APTR	4.19347	TMEM117	3.45642
505	PLEKHA4	2.9932	OAS1	4.36495	SEMA4F	3.40349	NPY5R	3.95113	KLHL2	4.19231	TPST1	3.45531
506	AGPAT5	2.9921	LAPTM4A	4.36359	GFM2	3.40326	YEATS2	3.94968	ARMC10	4.19174	DYNLT3	3.45473
507	PIK3R2	2.99105	CISD3	4.36184	FOXJ3	3.40123	TUBA1B	3.94962	B3GNT2	4.19016	BORCS5	3.45369
508	ARHGEF19	2.98808	GSTM3	4.36002	CNNM4	3.40102	BTRC	3.9494	SNTG2	4.18962	LRRTM3	3.45335
509	TTC1	2.9876	NUDT16L1	4.34996	ARMCX2	3.40099	ARHGDIG	3.94839	TMEM108	4.1889	HRH1	3.44732
510	SNX2	2.98741	SLAMF7	4.34836	RBM24	3.40069	ADAMTS8	3.94822	SSSCA1	4.1841	KIRREL3	3.44442
511	UNC5B-AS1	2.98553	ESD	4.33797	CCKBR	3.39955	UPK3A	3.94804	AZIN1	4.18182	PITHD1	3.44101
512	PDE3A	2.98502	AQP5	4.33679	ATP8A2	3.39806	VCPKMT	3.94406	WDR66	4.17844	BTBD10	3.43875
513	WIZ	2.98458	MUC4	4.33323	MED27	3.39635	DLK2	3.94401	PACRG	4.17841	STMN2	3.43726
514	C15orf40	2.98072	EIF1AY	4.32975	DNM1	3.38978	EGFL7	3.94045	ACTR10	4.17303	MAPRE2	3.43137
515	RNF150	2.97913	PRELP	4.328	MRPL44	3.38909	DHCR24	3.93937	NPY1R	4.1706	MKL1	3.42828
516	AZIN1	2.97574	CYBB	4.32546	GOLPH3L	3.38831	PIN1	3.93831	ALKAL2	4.16897	VIT	3.42733
517	ACSBG1	2.97465	GLRA2	4.32524	BCL2L13	3.38616	SERPINI2	3.93618	TUBA1B	4.16875	EMC3	3.42636
518	PON3	2.97223	SCGN	4.32437	CCDC3	3.38596	SNX10	3.93526	PCDH19	4.1671	FAM153A	3.42593
519	ERC1	2.9722	ARHGAP45	4.3234	PNMA8A	3.38326	UBE2MP1	3.93495	DDN	4.16684	USF3	3.42489
520	FGFR4	2.9707	GRAMD1C	4.32264	TUBA1B	3.3804	KIFAP3	3.93478	LRRC73	4.16673	LOC440084	3.42345
521	SLC7A7	2.96914	BLVRB	4.32024	BOP1	3.38002	VSNL1	3.93303	LIN7B	4.16431	HECTD4	3.42332
522	TMEM176A	2.96375	NHSL1	4.31882	RFPL1S	3.37975	CUL2	3.93242	GLOD4	4.16076	PEF1	3.42265
523	ISCA2	2.96221	GRIN3A	4.31873	KPNA2	3.37812	TRUB1	3.93067	EDNRB	4.16061	RPAP3	3.42042
524	EMP3	2.96	WASHC3	4.31417	BMPER	3.37657	MADD	3.9303	FILIP1	4.16001	KCNIP3	3.41018
525	RPL27A	2.95971	FAM212A	4.3141	DYNLT3	3.37519	STX1A	3.92773	MZT2A	4.15823	OXR1	3.41009
526	PLXNC1	2.95871	CYTH4	4.31292	GRIA3	3.37412	LRRC20	3.92755	ARPP19	4.15788	IL1RAPL2	3.40987
527	TSPAN11	2.95725	STOX1	4.31271	BAIAP2	3.3726	CAPRIN1	3.92561	PRDM16	4.15752	CNN1	3.40829
528	KCNE5	2.95662	SCN9A	4.3127	IKBIP	3.37206	PRSS3	3.92308	CDH4	4.15451	PHF14	3.40821
529	CREM	2.94972	LINC01736	4.31207	CD200	3.37164	PAK1	3.92117	NLE1	4.15172	INSM1	3.40731
530	RPL39L	2.94877	ST20	4.30853	VGF	3.37039	POPDC3	3.92065	TMEM164	4.15171	TMEM155	3.40524
531	ADA2	2.94632	MT1M	4.30769	DAGLB	3.36975	RDH11	3.9195	ADGRV1	4.15055	ST8SIA3	3.39902
532	MCM3	2.94544	LGR4	4.29399	NICN1	3.36942	PABPC1L2A	3.91589	CDC16	4.15048	SYT16	3.398
533	FRMD3	2.94447	FAM9B	4.28926	CCAR2	3.36901	GRIPAP1	3.91494	LMAN2L	4.14997	MPP2	3.3971
534	MOCS2	2.94394	EZR	4.28881	ANO3	3.36886	ACAT2	3.91093	PYGL	4.14909	MAGIX	3.39402
535	TNFRSF10B	2.94375	HLA-DRA	4.28867	MFSD3	3.36849	ZNF25	3.90989	ZNF818P	4.14657	LRRC8B	3.39355
536	LHFPL3	2.94359	SERPINA1	4.28172	SVOP	3.36848	CREB3L3	3.90947	LCLAT1	4.14628	SPON2	3.39133
537	NDUFB1	2.94202	ROMO1	4.28115	SATL1	3.36822	FSD1	3.90919	ABCB6	4.13903	KLHL18	3.39132
538	DUSP9	2.94189	ABI3	4.28024	ZNF263	3.36621	YWHAH	3.9055	ECHDC3	4.13886	YEATS2	3.38745
539	KBTBD6	2.93812	WDR86	4.27842	CD52	3.36575	TMEM141	3.90367	NPTXR	4.13407	XPO7	3.3873
540	PDE4DIP	2.93806	LOC105376064	4.27527	CCDC6	3.36478	PRSS1	3.90363	GAP43	4.13087	FBXL14	3.38615
541	WFS1	2.93742	TIMP2	4.27197	RARA-AS1	3.36345	SIDT1	3.9025	AMIGO2	4.13011	MTMR6	3.38528
542	HMOX1	2.9324	CCDC103	4.2719	LKAAEAR1	3.36246	PHKG2	3.90186	RTN4RL2	4.12466	PPP1CA	3.38468
543	GPR39	2.93168	CPAMD8	4.2695	NBAS	3.36221	TRPV2	3.90146	STX12	4.12408	DPF1	3.38312
544	LOC93622	2.93133	RPA4	4.26642	PABPC1L2A	3.36132	HRH1	3.90113	LOC644936	4.12381	AKAP8	3.38187
545	TBC1D27P	2.93061	OTOS	4.26574	TOMM40L	3.35714	PQBP1	3.89502	RTP1	4.12362	SCYL1	3.38185
546	MAOA	2.92956	P2RY1	4.26265	FBXO34	3.35336	CDH9	3.89502	CDH10	4.12083	NRSN1	3.37999
547	PSMD10	2.92759	SRP9	4.26105	GPR22	3.353	PRKAR1B	3.89392	CDC27	4.11895	CSNK2A1	3.37953
548	DERL1	2.92634	DNAJC2	4.25997	C2orf27A	3.35233	GPRASP1	3.89108	DNAAF4	4.11879	YIPF1	3.37915
549	YAF2	2.92552	FBLN1	4.25774	PPAT	3.34868	IGHMBP2	3.88831	GPM6B	4.11743	AP2A2	3.37388
550	TBX19	2.92552	KCNK2	4.2548	AHSG	3.34854	GUCA1B	3.88691	ME2	4.11533	TESPA1	3.37355
551	C22orf23	2.92514	ACTR10	4.25417	DYNC1H1	3.3437	PSMD11	3.88622	CYB561	4.11493	OGT	3.37101
552	LOC103344931	2.92469	FAM126A	4.25355	APMAP	3.34363	CLSTN1	3.88595	DYRK3	4.11414	CD83	3.37014
553	ARHGAP36	2.92374	NEBL-AS1	4.25322	IL27RA	3.34055	SAE1	3.8813	ZNF706	4.10626	TMEM56	3.36954
554	GPAM	2.92283	EPS8	4.24948	ACTA1	3.34027	LONRF2	3.881	HES4	4.10599	ASAP1	3.36881
555	LRRTM1	2.92282	CX3CR1	4.24656	TRIM11	3.33895	KLHL25	3.87439	MYB	4.1047	TRMT10C	3.36853
556	EFCC1	2.92178	BCL2A1	4.2451	KCNG3	3.33875	LAGE3	3.87398	PCDH17	4.10314	WDR26	3.36818
557	SPAG16	2.92171	TIMP4	4.24161	KCNJ12	3.33854	ESYT1	3.87321	MZT2B	4.10307	RDH12	3.36798
558	CMSS1	2.92081	HBQ1	4.24095	CHST15	3.3323	RCSD1	3.8729	CPNE6	4.103	CMAHP	3.36677
559	CREBL2	2.91912	ANP32E	4.24056	GUCY1A1	3.33156	ACTR1A	3.87274	EFHC2	4.10261	CYP4X1	3.36588
560	LOC400710	2.9186	TAC1	4.24041	SND1	3.33144	TMEM65	3.87085	GALNT14	4.10178	HECTD2	3.36439
561	BTBD9	2.91646	NSFL1C	4.23252	C12orf43	3.32646	FADS3	3.87053	RAPGEF4	4.10087	INPP4A	3.36352
562	ZNF818P	2.91608	ITPRIPL2	4.23087	BORCS5	3.32621	KBTBD11	3.87039	DKFZp779M0652	4.10012	CMTM4	3.3635
563	PEA15	2.9156	ABI1	4.2294	CAPNS1	3.32551	PGAM1	3.86894	SERP1	4.0997	OPN3	3.36245
564	UBR7	2.91477	RGS14	4.22829	MYOM2	3.3234	LOC101927278	3.8671	IL34	4.09914	ACTR3B	3.36023
565	LPXN	2.9146	NUDT17	4.22794	C2CD2L	3.32218	ALS2CL	3.86622	2001-03-01	4.09344	GNAZ	3.35801
566	RND3	2.914	NHP2	4.22363	GRK6	3.32115	LTK	3.86467	STK25	4.0894	SVOP	3.35756
567	OXER1	2.91315	HRASLS	4.22183	SNU13	3.32103	UMODL1-AS1	3.86327	CCDC3	4.08836	LOC440040	3.35703
568	PANX2	2.91106	PKIA	4.22013	KLHL35	3.32005	LNPK	3.85858	IPO5P1	4.08702	ZNF512B	3.35611
569	ZNRF4	2.90862	LOC101927811	4.22003	ZNF436	3.31872	TTF1	3.85752	GNG12	4.08642	MAN1A1	3.35546
570	RAB3D	2.90797	ARHGAP36	4.21931	TXLNB	3.31675	ALAS1	3.85721	SLIT3	4.08599	HACE1	3.3542
571	PSMD13	2.90751	UNC5B-AS1	4.21899	PRDM10	3.31597	PNMA2	3.85599	ANKRD30B	4.08482	PAFAH1B1	3.35398
572	CEBPZOS	2.90689	NMI	4.21788	GSG1L	3.31515	MAGEE1	3.84778	YWHAB	4.08253	RFPL1S	3.35397
573	PKIB	2.90639	TMEM200A	4.21754	SCO2	3.31277	STMN1	3.84716	LMO1	4.08126	CALCRL	3.35088
574	ERP29	2.90532	AGT	4.21602	TMEM130	3.31272	PDE1B	3.84688	ANO2	4.08075	PPP6C	3.35073
575	CASK	2.90384	FYB1	4.21497	LZTFL1	3.30883	PCDH20	3.84434	PDS5A	4.08061	LMO4	3.35009
576	HPCAL4	2.90278	BCL7C	4.21415	MPP2	3.30739	ASH2L	3.8415	MAP1LC3A	4.07888	NETO1	3.34866
577	E2F5	2.90188	KXD1	4.21319	AKR7A2P1	3.30674	SLITRK1	3.83947	AHCY	4.07856	HSDL1	3.34605
578	LIX1	2.90076	DARS	4.21231	MMP17	3.30632	NICN1	3.83934	HMGCS1	4.0771	LOC440300	3.3428
579	TMEM51	2.90036	LOXL3	4.21058	SSTR2	3.30513	C2orf27A	3.83921	BFSP1	4.0711	TMEM242	3.33676
580	TPM1	2.89992	TRIL	4.20934	PLXNA2	3.30506	STK19	3.83847	RIIAD1	4.07018	ZNF845	3.33506
581	CDC42P3	2.89881	PDGFRA	4.2054	GRM8	3.30481	SGSM3	3.83794	RLBP1	4.06365	RAD23B	3.33476
582	GPC2	2.89807	POLR2I	4.2012	STOML1	3.30392	FLOT1	3.83716	RPL27A	4.06188	EFNB2	3.33467
583	SUSD3	2.89753	NUDT11	4.20107	TMEM243	3.30328	LOC108783654	3.83594	TUBB8	4.05955	NRN1	3.33444
584	GLT8D2	2.89532	PPP1R18	4.19092	STMN1	3.30324	B3GNT2	3.83433	DDX10	4.05855	DPYSL4	3.33145
585	LINC00665	2.89522	C3AR1	4.19029	LRRC57	3.30254	FAM47E	3.83365	SPATC1L	4.05455	TMEM241	3.32771
586	S100A16	2.89517	PNPLA4	4.18931	EARS2	3.3025	CDKN3	3.83314	GLI3	4.05207	SKIV2L	3.32736
587	AGAP2	2.89462	SEM1	4.18741	TMEM59L	3.30078	OPCML	3.83198	C20orf27	4.05053	ATF6	3.32532
588	TRAPPC2	2.89431	VAMP8	4.18724	ARPC4	3.30057	DPH2	3.83165	TBCA	4.04945	YWHAH	3.32432
589	DACT1	2.89327	TMEM208	4.1849	MCHR2	3.29976	ADRA1B	3.83033	PTGER3	4.04924	LOC728485	3.31699
590	CFAP61	2.88824	TUBB8P12	4.1832	FLOT1	3.29785	ADCY7	3.82921	CREM	4.04618	NOS2	3.31524
591	POLB	2.88775	ISCA2	4.18243	EPOP	3.29688	SNN	3.82531	TXNRD3	4.04545	REPS2	3.31226
592	CEP89	2.88748	MIR99AHG	4.18216	OAZ1	3.29562	CD53	3.82439	TBCB	4.04364	TM6SF1	3.3106
593	RYR3	2.88678	PHYHD1	4.17996	HINT1	3.29517	ATP6AP1	3.82365	CA11	4.04107	RABIF	3.31027
594	BCAN	2.88619	SNCG	4.17404	SYT16	3.29312	FN3KRP	3.81894	GCNT1	4.03832	RAB11FIP4	3.30977
595	RPL4	2.88615	STARD3NL	4.17003	NETO2	3.29067	TSTA3	3.818	FNIP2	4.03491	PPP3CB	3.30387
596	ITGB2	2.88164	PIK3AP1	4.16844	CDH9	3.28992	KLHL35	3.81719	TAGLN3	4.03453	CLINT1	3.30271
597	SPATA1	2.88161	COMMD6	4.16831	EXOSC9	3.28915	CNTN3	3.81676	SLC30A10	4.03234	SNX32	3.30024
598	INTU	2.87848	SLCO1C1	4.16556	ALDOA	3.28624	C14orf28	3.81623	PKIB	4.03121	TMEM121B	3.29987
599	IL15	2.87721	ISYNA1	4.16552	GPN2	3.28539	CUL4A	3.81612	CMTM8	4.02961	MPV17L2	3.29619
600	SCUBE2	2.87376	ZC3HAV1	4.16446	SLCO2A1	3.28137	MCHR2	3.8089	TPI1	4.02853	GRM5	3.29529
601	LCP1	2.87331	LSM7	4.16433	MAGED1	3.27943	HEXB	3.80656	SOX9-AS1	4.02453	CYHR1	3.29422
602	CLEC9A	2.86953	CEBPA	4.16383	MLIP	3.2794	RASA2	3.80389	ME1	4.02141	NELL1	3.29316
603	ZNF831	2.86822	KIAA1191	4.16242	ZWILCH	3.27929	PPARG	3.80339	FDX1L	4.01912	KCNH5	3.29214
604	CYB5A	2.86467	APOE	4.16112	LINC01750	3.27553	SERP2	3.80128	UBE2Z	4.01678	MYCBP2	3.29184
605	PYGL	2.86334	ACAA2	4.16071	OXR1	3.27238	PCMT1	3.80116	PMVK	4.00955	NRCAM	3.28738
606	TMED10P1	2.86322	GNB2	4.15992	METAP1	3.26826	ZBBX	3.79675	LOC93622	4.00711	OVOL2	3.2866
607	CYB5B	2.86045	NIP7	4.15847	RXFP1	3.26716	EGR3	3.79494	LOR	4.00406	UBALD1	3.28659
608	PHYHD1	2.8603	ZFAND3	4.15841	TLN2	3.2668	EID2	3.79422	NRCAM	4.00375	CDH22	3.2842
609	CCZ1	2.85854	ATOX1	4.1582	RAB3GAP1	3.26018	PHF24	3.79361	NOVA2	4.00243	TMEM240	3.28387
610	CACNA1E	2.85776	NWD1	4.15661	HARS	3.2593	TNFRSF11A	3.7936	MCTP1	4.0023	GABBR2	3.28358
611	C3AR1	2.85763	MRPL20	4.15621	LINC02361	3.25897	ADPRHL2	3.79214	CALHM6	4.00174	TCF20	3.28157
612	PRR29	2.85749	PALMD	4.15202	SAMD12	3.25523	ZBTB41	3.79088	PAK3	3.98801	TNFRSF4	3.28143
613	CBR3	2.85605	TMEM256	4.15161	TRAPPC5	3.25523	TFRC	3.78937	TMEM208	3.98761	LSM11	3.28111
614	ATP6V1H	2.85371	CHST9	4.15084	B4GALNT1	3.25487	SH2D2A	3.78631	NCAM2	3.9876	NUP50	3.28004
615	GUCY1A1	2.85299	MRPL23	4.15015	FAM122A	3.25319	RETREG2	3.7852	RSPH14	3.98687	DUSP6	3.27954
616	MEG3	2.8509	P2RY12	4.14962	ZNF25	3.2514	RTN4RL2	3.78498	ZCCHC12	3.98665	PSMD11	3.27639
617	CCDC88C	2.85023	LARGE1	4.14683	RANBP2	3.24955	RETREG1	3.78124	CCNH	3.98663	NWD2	3.27618
618	LILRP2	2.84844	ZCWPW2	4.14467	PMS2	3.24955	ACTC1	3.77914	KCNMB2	3.98398	CUL9	3.27509
619	ZNF112	2.84802	ARHGAP6	4.14459	EBNA1BP2	3.24836	ARMC10	3.77902	EXOC6	3.98319	CCDC9	3.26885
620	CACUL1	2.84341	C1QB	4.1438	RCSD1	3.24747	SYNM	3.77325	TMEM54	3.98232	ABHD8	3.26771
621	FOXA2	2.84286	CDH4	4.1394	MCTP1	3.24719	SLC35C2	3.77185	AK5	3.98037	MGRN1	3.26461
622	LINC01315	2.84105	NAGK	4.1381	CALM2	3.24504	HS6ST1	3.7712	ELL3	3.97928	SNHG28	3.26391
623	CENPW	2.84093	UBE2D2	4.13476	ATP6V1C1	3.24475	LY6E	3.77112	PTCHD1	3.9787	VEZT	3.26281
624	ATP2C1	2.84051	RNASEH2C	4.13412	B3GNT4	3.24442	NUDCD1	3.77066	UBE2D2	3.97609	RNF44	3.26145
625	ROBO1	2.83834	ZFP36L1	4.1329	RFK	3.24383	CDC34	3.76949	SPATA18	3.97281	ZNF391	3.25985
626	ZCCHC12	2.83801	NANOS1	4.13219	STARD4	3.24228	TMEM186	3.76856	LINC01750	3.96975	TOMM40L	3.25694
627	ICE1	2.83649	LOC728715	4.1317	DIRAS2	3.24222	GOLGB1	3.7681	FIBIN	3.96695	AGK	3.2553
628	FAM171A2	2.8329	TMEM51	4.12788	USP46	3.2393	WIPF2	3.76786	CYP26A1	3.96624	FAM234B	3.25295
629	LY96	2.83234	PARD3	4.12745	AACS	3.23774	PRKAR2B	3.76707	CCDC90B	3.96215	ELAVL2	3.25275
630	COG1	2.831	S100A13	4.12465	NRXN1	3.23748	OAT	3.76409	ITPRIPL2	3.96136	KCTD21	3.25178
631	CALN1	2.82584	ACOT8	4.12142	PRR3	3.23654	CDC123	3.76336	SYNPR	3.96056	HIF1AN	3.24779
632	TIMP4	2.82572	ELL3	4.12041	CPNE8	3.23574	LCP2	3.75935	SNAPC5	3.95736	ACTN2	3.24368
633	SPTBN2	2.82464	RIPOR2	4.11677	DENND3	3.23404	PLXNA1	3.75914	GTF2H5	3.95277	GPX3	3.24281
634	ADAP2	2.82442	LDOC1	4.11618	ARF3	3.23039	P2RX5	3.75866	WIPI2	3.9518	BRD3OS	3.24185
635	STRADB	2.82354	YJEFN3	4.10677	CDH22	3.23021	TWIST1	3.75467	FREM3	3.94991	RGL1	3.2394
636	LOC389831	2.82331	CETN3	4.10647	ZNF429	3.23006	MLIP	3.75405	COPS4	3.94916	SLC29A3	3.23849
637	GPT2	2.82321	SLC7A7	4.10528	LINC01963	3.22996	UBR1	3.75332	WIF1	3.94858	LOC105378853	3.23791
638	UBE2L6	2.82276	ZC3H15	4.1051	ASXL3	3.22742	DNM1L	3.75311	TDRKH	3.94815	SEC61A2	3.23661
639	SLC22A3	2.82263	ALG8	4.10494	TMEM155	3.22686	GPATCH4	3.74972	CAP1	3.94787	SAP25	3.23521
640	HS2ST1	2.82202	SLC25A23	4.1038	SLC9A7	3.22626	DRC1	3.74465	KPNA2	3.94717	B9D2	3.23265
641	TRAF3IP2	2.82196	SNAP29	4.10356	METTL21A	3.22584	OCA2	3.74422	SF3B3	3.94588	SLC39A9	3.22745
642	HLA-DOA	2.82109	CEP83	4.09786	MPPED2	3.22507	HIF1AN	3.74286	CABYR	3.94087	BCAS3	3.22736
643	CA5B	2.82011	IRF5	4.09773	RCN1	3.22036	BBC3	3.74278	TRIP12	3.93946	LIG4	3.22718
644	SQOR	2.81995	HCK	4.09604	FBXO44	3.2202	LRRC41	3.74187	GRIK2	3.93909	TP53TG3D	3.22663
645	ALPK1	2.81573	TMEM106C	4.09489	PPIAL4G	3.21885	HARS	3.74021	CGREF1	3.93538	USP7	3.2227
646	LRCH2	2.81415	ZNRF4	4.09443	MYB	3.21798	SNAPC5	3.73785	TRUB1	3.9337	GALNT9	3.22208
647	FAH	2.81291	ENDOU	4.09224	POP7	3.21775	NDUFAB1	3.73686	TECPR2	3.93302	UBR1	3.2188
648	RPL22	2.81079	RSPH1	4.09057	TPST1	3.21748	LRRC8B	3.73677	STX17-AS1	3.93076	HSPBP1	3.21827
649	SLC16A2	2.80957	CSPG4	4.08884	ATG5	3.21561	PTRH2	3.73593	TMEM200A	3.92661	PRKAA2	3.21701
650	GSTM5	2.80944	MYDGF	4.08656	SLC39A4	3.21419	SMUG1	3.73277	ADTRP	3.92218	C2orf81	3.21683
651	WRB	2.80882	CA8	4.07857	SYN1	3.21308	PWP1	3.7313	RUNDC3A	3.92114	NEXMIF	3.21528
652	DRAXIN	2.80694	LINC00319	4.07739	COL5A2	3.21201	EIF1AD	3.73027	KCTD15	3.9205	TPBG	3.2121
653	MRPS6	2.8065	SLC4A3	4.07678	CENPF	3.21083	TMEM39B	3.73018	POMGNT2	3.91962	FEM1B	3.21136
654	CLIC6	2.80598	APLN	4.07535	CMAS	3.20912	YIPF1	3.72945	LAMA1	3.91833	TRIM36	3.21111
655	ALDH2	2.8055	TTLL1	4.07425	DBNDD1	3.20872	MAST3	3.72918	SLC35F2	3.91336	DYNC1H1	3.2107
656	LY9	2.8055	DHRS9	4.07327	NECAB1	3.20799	ENSA	3.72772	GIT1	3.91117	CENPT	3.20596
657	PGM2	2.802	SUMF1	4.07259	LOR	3.20722	RNF111	3.72542	CDC42	3.91018	SPATA7	3.20585
658	CNTN5	2.80176	RTBDN	4.07243	GPI	3.2059	DCUN1D4	3.72498	ATP8A2	3.90775	CRNKL1	3.20485
659	CABP7	2.8016	GNAI2	4.07053	DNM1P50	3.20421	NARF	3.72425	JPH4	3.9077	KPNA1	3.20389
660	PNO1	2.7997	VWA5A	4.06958	RDH11	3.20387	PSMG3	3.72403	TUBB	3.90533	RASA2	3.20319
661	PCDHGC3	2.79773	FAM167A-AS1	4.06823	AIFM2	3.20269	CHMP4B	3.72287	JPH3	3.89704	R3HDM1	3.20148
662	LARGE1	2.79713	CENPW	4.06505	BFSP1	3.20154	AP1S1	3.71977	TIMM8B	3.89317	FADS3	3.19703
663	PRR7	2.79286	LOC441052	4.05893	PDHA1	3.19977	FAM168B	3.71522	JUN	3.88885	ATXN7L3B	3.19701
664	GPRIN2	2.79224	FGD4	4.05536	ST6GALNAC5	3.19149	ENC1	3.71499	SMKR1	3.88792	SESN1	3.19536
665	HCK	2.79218	MYH15	4.05407	TLL1	3.18785	TBRG4	3.71383	GTF2F2	3.88714	RPRD1A	3.19315
666	OSTCP1	2.7898	LTC4S	4.05307	RASA2	3.18518	PNMA8A	3.71164	ATP9A	3.88666	SFXN3	3.19239
667	TMEM218	2.7885	ACBD7	4.0505	MYCBP2	3.18209	TESPA1	3.7092	ELMO2	3.88062	IFIT1	3.19185
668	SULF2	2.78822	RAB27B	4.05039	RAB3D	3.17967	SLC25A11	3.70828	PNMA8A	3.87698	TUBG1	3.18985
669	IL33	2.78802	MGC70870	4.04146	EPS15	3.17802	BYSL	3.70764	RRAGD	3.87639	BMPER	3.18945
670	MANEAL	2.78798	KCNQ2	4.04045	GBAP1	3.17785	RAPH1	3.70737	OXCT1	3.87574	KRT14	3.18875
671	AP2B1	2.78765	DERL3	4.04011	CORO1A	3.17676	LOC644189	3.70435	DYNC1I1	3.8701	CHN1	3.18552
672	RESP18	2.78614	DOC2B	4.0388	E2F3	3.17604	TUBB4A	3.70407	SIN3B	3.8677	ANKRD30B	3.18494
673	CIB2	2.78393	SULT1C4	4.03736	NELL2	3.17508	ANO5	3.70251	CFAP44	3.86752	TBC1D24	3.18447
674	SNRPC	2.78245	S1PR1	4.03639	PDHB	3.17505	FSTL5	3.7008	EFEMP2	3.86732	C2orf27A	3.1808
675	BCR	2.77879	OXTR	4.03633	DECR2	3.17306	C16orf87	3.6994	MPV17L2	3.86731	CDK5R1	3.18079
676	SZRD1	2.775	PLAC9P1	4.03613	CCDC88C	3.17287	LOC105376360	3.6976	RSPO3	3.86586	KBTBD11	3.18046
677	BBOX1	2.77346	C22orf23	4.03472	VSNL1	3.17199	FILIP1L	3.69747	MKL2	3.86443	KCNJ4	3.17952
678	IDNK	2.77218	ATP5MF	4.03438	LRRTM3	3.17088	STBD1	3.69518	ZSWIM9	3.8628	DPP10-AS1	3.17926
679	PFKL	2.77167	GLUD1	4.03403	MED31	3.16935	PRDX5	3.69216	DNAH2	3.86279	ERLIN1	3.17875
680	PRPS1L1	2.76989	BLNK	4.03268	RANBP9	3.16915	OXR1	3.69059	VIT	3.86153	F12	3.17824
681	SFMBT2	2.76938	SKP1	4.03055	KCTD8	3.16906	PPME1	3.69004	DYRK2	3.85785	FAM110C	3.17693
682	DRD2	2.76927	MR1	4.03043	DOCK4	3.16771	FDX1L	3.68967	MECR	3.85453	CYFIP2	3.17519
683	ROBO2	2.76908	FAM200B	4.02526	USP6	3.16667	TNNT2	3.68794	HNMT	3.85258	KYAT3	3.1751
684	P2RY13	2.76785	AP2B1	4.02445	TESPA1	3.16611	ARF5	3.68613	C16orf95	3.85113	CAP2	3.17274
685	CC2D2B	2.76597	KLK7	4.02328	TATDN2	3.16455	FAM234B	3.68522	SGSH	3.84754	SHISA9	3.1724
686	DKFZp779M0652	2.76477	FHOD3	4.02226	ADTRP	3.16262	HINT1	3.68377	RAB3GAP1	3.84716	SUSD5	3.16995
687	TUBA1C	2.76456	PRR29	4.02196	TPI1P2	3.16139	DNAJB6	3.67918	MEA1	3.83735	RIOX1	3.16822
688	MAPKAPK5-AS1	2.76039	PLIN5	4.01728	CRSP8P	3.16118	RPRD1A	3.67811	USP9X	3.83732	STRIP1	3.16734
689	RPL7L1	2.75848	C2orf74	4.01453	ATP6AP1	3.16026	SYCE1	3.67806	VSTM2L	3.83532	ACSL4	3.16624
690	LOC105374546	2.75845	NDUFC2	4.01423	AP2M1	3.16001	POLG	3.67431	LRRC57	3.83463	NEUROD6	3.16583
691	LACTB	2.75802	CLEC9A	4.01407	ESYT1	3.15693	GPR20	3.67338	VEZT	3.83418	UTP6	3.16474
692	EFCAB11	2.758	HLA-DRB3	4.01078	GPR150	3.15457	KLHDC9	3.67308	GNAQ	3.83155	LYRM4	3.16391
693	ORAI2	2.75393	MT1E	4.00927	SLITRK1	3.1539	AARS	3.67303	CELF4	3.82959	LOC105376360	3.16325
694	NHS	2.7532	RRP7BP	4.00895	B3GNT2	3.15379	C16orf95	3.67222	PSMD1	3.82581	EHD3	3.16261
695	TRIM61	2.75224	ASCL2	4.00829	PREPL	3.153	PIK3R1	3.67109	SPON2	3.82107	CRLF1	3.1624
696	SLC24A1	2.74849	ANXA2	4.00726	MTCH1	3.15162	VPS13D	3.67088	PSMB1	3.82031	LINC00506	3.16182
697	MBLAC2	2.74808	DYNLL1	4.00588	ANKRD28	3.14999	NCKAP1	3.66962	NETO2	3.81952	NRXN3	3.16005
698	ANP32AP1	2.74753	ADD3	4.00575	PITHD1	3.14985	GULP1	3.66778	LYPD8	3.81951	AKT3	3.15971
699	HDDC2	2.74751	PCDHGC3	4.00501	PHYHIPL	3.1497	ARHGEF25	3.65805	FAM200B	3.81921	CDH9	3.15791
700	LOC101060391	2.74666	PSMB10	4.00445	SYCE1	3.14804	BABAM1	3.65536	ENO1	3.81406	TRAPPC5	3.15769
701	RALGPS2	2.7451	EME2	4.00433	NDST3	3.14655	CLPB	3.65477	TLN2	3.81271	SGSM1	3.15751
702	KCNQ1	2.74426	PPP1R1C	4.0025	TGFBR3L	3.14605	DDX25	3.65446	UBE2B	3.80988	LRRC57	3.15573
703	CPNE6	2.74364	RER1	3.99944	EIF1AD	3.14543	CHST15	3.65399	GSS	3.80932	TSPYL4	3.15425
704	NINL	2.74276	RBM8A	3.99738	VIT	3.14447	RC3H2	3.65271	OAF	3.80505	PP12613	3.15115
705	SHF	2.74261	NISCH	3.99736	COA6	3.14325	NME7	3.65214	PON2	3.80441	PLXNA2	3.14901
706	HEBP2	2.74253	FAM162A	3.9969	TEX29	3.14209	CPNE1	3.65101	TNFAIP8L1	3.80123	SSR4P1	3.1487
707	APBB1IP	2.74209	MYO16	3.9959	TMX4	3.14117	SH2D3C	3.65048	WWC1	3.80066	RTN1	3.14681
708	SAP18	2.74204	CD63	3.99445	BDNF	3.13742	LOC389895	3.64906	PITPNM2	3.79983	DIRAS2	3.14408
709	ZNF677	2.74089	PDLIM3	3.98965	KCNB2	3.13736	BSN	3.6486	CRMP1	3.79924	CACNB1	3.14143
710	EFNA2	2.73901	DAB2	3.98932	ADGRB2	3.13603	ZNF622	3.64851	HSPB11	3.79781	TM2D3	3.13975
711	TRAIP	2.73881	SLC30A10	3.98446	LRSAM1	3.13573	RNF167	3.64848	ABCC6	3.79587	RTP1	3.13942
712	PKN1	2.73863	STK25	3.98301	TMPO	3.13231	JMJD1C-AS1	3.64842	KLF8	3.79528	ICAM5	3.13882
713	YBX1	2.73669	EMP1	3.98028	OGT	3.13028	OPRM1	3.64713	GLRA3	3.79506	KLHL2	3.13631
714	MYT1	2.7363	AXL	3.97776	GSS	3.12733	RTCB	3.64713	IKBIP	3.79322	TOLLIP	3.13316
715	PGBD5	2.73587	LAIR1	3.97369	CELF4	3.12649	CD200	3.64684	LONRF2	3.79194	ZGPAT	3.13299
716	SLC44A3	2.73559	C1orf54	3.97023	RAPH1	3.12596	SLC30A3	3.64595	FAM213B	3.78934	GRIN2B	3.13267
717	MYD88	2.73447	LGALS3	3.96798	SH3GLB2	3.12595	DPAGT1	3.64362	PEX10	3.78719	PRPH2	3.13185
718	LY86	2.73426	PFKL	3.9664	KIRREL3	3.12478	MIGA1	3.64221	VPS37C	3.78353	ALS2CL	3.13061
719	RBM34	2.73414	SLC44A2	3.96546	PMPCB	3.12442	WIPI2	3.64176	TMEM59L	3.78239	PRKCG	3.12797
720	DDAH2	2.73111	EPHX2	3.96084	TUBB2A	3.11696	TRMT2A	3.64084	TMEM53	3.78181	SEL1L	3.12668
721	DAB2IP	2.7298	BHMT2	3.96045	NDUFC2	3.10963	TRAF3	3.64047	GBAP1	3.77985	HMGCR	3.12564
722	ADCY8	2.72832	TP53TG1	3.95912	FOXRED2	3.10931	PRMT5	3.63929	SUMO3	3.7793	DLEU7	3.12484
723	MYCNOS	2.72781	PEG10	3.95801	AOC2	3.10854	DYRK2	3.63917	B4GALT5	3.77692	IPCEF1	3.12477
724	DCLK2	2.72454	NACC1	3.95739	ZMYND19	3.10818	LZTFL1	3.63654	CFD	3.77642	RFX3	3.12455
725	KDM1B	2.7232	NXN	3.95718	ADGRL3	3.10599	PINK1	3.63455	CHRDL1	3.77574	PNPLA6	3.12357
726	PARP11	2.72289	PLP2	3.95643	LMBRD2	3.10267	PRSS3P2	3.63292	TYRO3	3.77395	HPS6	3.11915
727	TBXAS1	2.72277	LINGO3	3.95591	GLRA3	3.10125	NUDT14	3.63274	MYBPC1	3.77347	DACH2	3.11544
728	INPP4B	2.72145	LAPTM5	3.9544	HEXB	3.10042	LINC00839	3.62944	SH3BGR	3.77167	FRRS1L	3.11141
729	RPL21P44	2.71983	TPM3P9	3.95146	EFNB2	3.09943	PPIAL4G	3.62835	CNN3	3.7688	PRICKLE2	3.11136
730	LOC102724156	2.71662	NIPSNAP3A	3.95055	C16orf91	3.09807	KLHL22	3.62718	EZR	3.76861	LINC01296	3.11083
731	HSBP1	2.71478	TSACC	3.94924	COP1	3.0978	RAB33A	3.62704	ZBTB44	3.76761	HK1	3.10982
732	IGSF22	2.71204	MANEAL	3.94786	LSM4	3.09587	SPINT2	3.6257	LDHA	3.76648	OTUB2	3.10821
733	EIF3M	2.71162	SLC7A10	3.94728	RPUSD3	3.09369	FRS3	3.62282	SPATA1	3.76533	ZNF483	3.10806
734	KCTD12	2.71156	GRIA1	3.94413	FNDC11	3.09057	STRIP1	3.62009	GPR27	3.76167	NOMO1	3.10607
735	SUMO2	2.71124	CYP11A1	3.94308	LINC01296	3.08898	NLK	3.61946	LINC02076	3.7603	CRY2	3.10385
736	MILR1	2.71028	TBXAS1	3.94305	ARF1	3.08824	LRRC2	3.61808	OAZ1	3.75981	MFSD4B	3.10333
737	BTBD17	2.70825	C15orf40	3.9413	GHITM	3.08758	SAMM50	3.61786	AIFM2	3.75873	TNFRSF14	3.10306
738	YWHAZ	2.70792	CDKN2D	3.94035	KLHDC3	3.08705	SNX33	3.61726	TMEM128	3.7578	CBFA2T3	3.10299
739	OTUD6A	2.70777	MNDA	3.93814	BEX5	3.08696	SYNPO2	3.61686	ADGRL3	3.75625	OSBPL10	3.10288
740	PI4K2B	2.70759	UBE2S	3.93722	WIPF2	3.08516	OSER1	3.61479	ATP6V0E2-AS1	3.75579	SENP3	3.10281
741	SP5	2.70735	MRC1	3.93602	CDK5	3.08497	ZMPSTE24	3.61068	SUSD1	3.75376	ADRA1D	3.10253
742	ADH5	2.70682	NEDD4	3.93595	NOL4	3.08344	ADAR	3.61001	SCG3	3.75271	MAFK	3.10168
743	LOC101927752	2.70617	CYB5R1	3.93464	PPME1	3.08328	PLD3	3.60644	TMEM150C	3.75068	HSPA4	3.10116
744	GNG4	2.70573	AKTIP	3.93422	WDR54	3.08227	DOC2A	3.60514	CCKBR	3.74925	PPM1L	3.10005
745	S100A11	2.70526	VSIR	3.93416	HMGCS1	3.08147	NDUFAF1	3.60451	HES5	3.74919	E2F4	3.09844
746	HLA-DPB2	2.70411	PALD1	3.93255	SLBP	3.08006	SYT1	3.60116	PAMR1	3.74581	TUBB	3.09811
747	TNNT1	2.70363	YAP1	3.93153	GUCA1B	3.07734	C11orf87	3.59684	MCUR1	3.74271	RTL5	3.09692
748	FOLR2	2.70276	IL13RA2	3.93069	C11orf74	3.07453	TMEM200C	3.59626	KLF10	3.74251	ASH2L	3.09479
749	CFD	2.70156	FOLR1	3.92769	KIF3A	3.07448	GTDC1	3.59363	HGF	3.74024	CHP1	3.09462
750	DDN	2.7003	NABP1	3.92594	BATF3	3.07416	NDST3	3.59052	NEUROD6	3.73896	PRRT1	3.09451
751	ERFE	2.69899	FAM89A	3.92541	ADSS	3.07393	TSPAN33	3.58869	AZIN1-AS1	3.73857	PCNX1	3.09314
752	ZNF876P	2.69884	B3GALT6	3.92456	CHMP1B	3.07311	LINC01296	3.58542	MAP2K1	3.73778	AHSG	3.09287
753	MLH1	2.69596	LY9	3.91568	FAM19A1	3.07271	SPICE1	3.58502	KCTD4	3.73617	RFK	3.09222
754	HTR4	2.69577	MILR1	3.91318	NEXMIF	3.07206	HMGCS1	3.58379	C8orf33	3.7343	MAP1S	3.0903
755	MAPK3	2.69171	EMC7	3.90684	CAMK4	3.0689	MB21D2	3.58358	SYNGR3	3.73416	MEDAG	3.08991
756	TP53I11	2.69142	MLC1	3.9048	CCT7	3.06701	WASF1	3.5825	CAMK2D	3.72813	PXMP4	3.08955
757	TIMP3	2.69127	C19orf70	3.90263	OCA2	3.06313	SLC39A3	3.57467	GRM3	3.7275	C20orf194	3.08849
758	WDR77	2.69082	DDB1	3.90257	RTN4IP1	3.05941	ATP9A	3.57249	GNPTAB	3.72449	RANGAP1	3.08736
759	SMOX	2.68658	CABCOCO1	3.90106	SUSD1	3.05706	DNM1P50	3.57111	HADH	3.72387	MAN1A2	3.0871
760	CYTH4	2.68536	GRP	3.90102	TOM1L1	3.05699	LINC00680	3.56962	RRAS2	3.72361	DLG3	3.08626
761	PGAP1	2.68409	LOC285097	3.90069	HSPA13	3.05507	PEX5	3.56795	HNRNPC	3.72268	TOX	3.08601
762	IPP	2.68348	MMAB	3.90053	RNF41	3.05395	TAF9	3.56781	CUL4A	3.72043	ATP6V1C1	3.08596
763	UMPS	2.68034	GMIP	3.89424	C11orf87	3.05024	ATP6V1E1	3.56772	CPLX3	3.72	AP3M2	3.08469
764	TNFAIP8L2	2.67847	ANAPC11	3.89379	DUSP14	3.04959	RBM24	3.56682	SERINC1	3.71888	RPRD1B	3.08435
765	DLL3	2.67798	TLCD2	3.89067	DDX1	3.04849	MRPL28	3.56665	FZR1	3.71883	WDFY1	3.0841
766	NEDD4	2.67784	GGCX	3.88672	TUFT1	3.04754	SMIM24	3.56649	WDR6	3.7186	COL26A1	3.08225
767	UBXN8	2.67725	CHMP4A	3.88656	DHRS7B	3.04748	LINC02361	3.56643	TRIM68	3.7183	DOC2A	3.08215
768	SDHAF4	2.67617	AMN1	3.88588	UQCC1	3.04705	LYPD8	3.5658	SC5D	3.71692	PSD3	3.08093
769	ADCYAP1R1	2.67451	PSMB2	3.88495	PPP2R2A	3.04692	RFPL1S	3.56343	FAM187A	3.71639	SLC26A4-AS1	3.08004
770	LMO1	2.6744	DR1	3.8844	GFPT1	3.04321	MRPS18A	3.56314	TRAPPC2L	3.71619	ARHGEF12	3.07912
771	LTC4S	2.67413	ADHFE1	3.88299	POLG	3.04315	MPG	3.56273	RNF5P1	3.71018	TRIB3	3.07695
772	SOCS7	2.67398	KIF21B	3.88071	PRKAR1B	3.04196	PPP2R5E	3.56235	SEMA6B	3.70919	SYNPO2	3.07436
773	SLX4IP	2.67098	CACNG3	3.87903	ADCY7	3.04143	FHL2	3.55825	TRIL	3.70868	PCDHB9	3.07392
774	GSTO2	2.66977	BRMS1L	3.87901	DHCR24	3.03967	KHDC1L	3.5579	FARSB	3.70406	ATCAY	3.07211
775	KRTAP19-2	2.66874	GINS2	3.87872	CIDEA	3.0386	TMUB2	3.5554	ACTR3B	3.69471	MAP2	3.07056
776	ABI2	2.66773	SH3GLB1	3.8763	CYP1B1-AS1	3.03723	CENPF	3.5551	ALDH2	3.69417	WDR31	3.0704
777	MNT	2.66657	ITGAX	3.87589	FAM153A	3.03704	FARS2	3.55158	FNBP1L	3.69403	EXTL1	3.0694
778	MKNK1	2.66463	AAED1	3.8729	GNG3	3.03698	SKIV2L	3.55013	LDOC1	3.6885	RARB	3.06404
779	DBN1	2.66454	ATOH7	3.87156	C1QL3	3.03553	CDH22	3.5479	WDR48	3.68768	VGF	3.06177
780	SLAIN2	2.66261	SLC15A2	3.86696	PLD3	3.03484	RUVBL2	3.54462	DUSP28	3.68628	RNF175	3.06137
781	BMP2K	2.66182	NQO1	3.86559	PLCL2	3.0341	KIF3C	3.54458	INSM1	3.68617	PPM1H	3.0612
782	OTX1	2.66124	DKK3	3.86505	EID2	3.0331	COL23A1	3.54456	RAVER2	3.68567	RASAL2	3.05732
783	HLA-DRB1	2.66072	FAM86EP	3.86484	IER5L	3.03185	RAP2A	3.54374	CYHR1	3.68531	C1QL3	3.05654
784	ZNF93	2.65985	LEPROT	3.86465	CARTPT	3.03177	AQP11	3.54323	SCN9A	3.68333	UCHL1	3.05428
785	RAB8B	2.65938	TRPC4	3.86191	ZNF648	3.03003	GLRA3	3.54313	TBC1D14	3.68298	B4GALNT1	3.05375
786	GASAL1	2.65935	VAV1	3.86173	DRC1	3.0296	ZNF554	3.54175	ZC3HAV1	3.68104	FAM173B	3.05286
787	TATDN3	2.65624	SOX5	3.8616	SLC25A44	3.0288	JAZF1	3.54061	SQLE	3.68033	GDF10	3.05076
788	KPNA3	2.65554	HLA-H	3.86068	MMS19	3.02798	FAM160A2	3.54013	TPM3P9	3.67904	MTA3	3.04936
789	DPY19L3	2.65506	TSPAN6	3.86035	FAM168B	3.02688	HMGCR	3.53858	SIDT1	3.67488	RECQL4	3.04698
790	PLCE1	2.65297	MT3	3.85979	RAB39B	3.02553	SERPINB2	3.53328	TUBA1A	3.67434	CCNY	3.04612
791	TMEM249	2.65287	CNMD	3.85808	JPT1	3.02455	NUDT10	3.52678	AP1S1	3.67414	PQLC1	3.04612
792	ETFRF1	2.6528	SURF1	3.85732	FHL2	3.02439	FNDC11	3.52624	PDGFRA	3.67193	RNF219	3.04527
793	BCCIP	2.65209	BATF3	3.85399	PKDCC	3.02364	JAG2	3.52551	PRMT6	3.66899	SATB2	3.04331
794	HSDL2	2.64926	HSD17B6	3.85262	POP4	3.02224	B4GALT5	3.52473	SYTL5	3.66666	BTBD6	3.04299
795	TPM3P9	2.64697	ALDH6A1	3.85159	TMEM141	3.02097	PSMC3	3.52403	KXD1	3.66649	P2RX5	3.04121
796	ZDHHC8P1	2.64554	ZNF883	3.84991	KCNA4	3.02068	ITGB1BP1	3.52359	TBCD	3.66557	FOXJ3	3.04064
797	SYNDIG1L	2.64318	RYR3	3.84926	C1QL2	3.01713	RABEPK	3.5229	STK17B	3.66441	KCTD17	3.0393
798	SLC30A10	2.64298	PSME1	3.84772	JMJD1C-AS1	3.01633	CARTPT	3.52259	WSB2	3.66369	RELB	3.0357
799	SBDS	2.64269	GABARAP	3.84747	PSD3	3.01395	OAZ1	3.52199	STRAP	3.65811	AP1S1	3.03562
800	ATP7B	2.64046	BRD7P3	3.84735	PGAM1	3.01389	NETO1	3.52137	DDX54	3.65778	APMAP	3.03509
801	PDIA3P1	2.63916	SCUBE2	3.84661	LINC00507	3.01184	MAP4K3	3.52133	RSPH1	3.65701	SMCO2	3.0343
802	ALDH5A1	2.63876	KLK10	3.84633	ICAM5	3.0099	NAXE	3.52049	CELF6	3.65572	LOC441666	3.0311
803	FAM162A	2.63847	GAREM2	3.84585	APEH	3.00873	MLF2	3.52032	B3GALNT1	3.65565	PNMA1	3.03031
804	CYSTM1	2.63843	IZUMO4	3.84529	AKAP11	3.00632	LINC00507	3.51913	PAXIP1-AS1	3.65332	PABPC1L2B	3.0292
805	SMIM14	2.63771	WNT10B	3.84468	SNTB2	3.00536	DNAJC27	3.51845	SH3GL3	3.65145	TMEM121	3.02862
806	HYKK	2.6371	ZNF219	3.84382	ATG101	3.0052	FRMD6	3.51729	LOC441666	3.64567	ALKBH4	3.02655
807	TBCA	2.63648	DSTN	3.84322	JAG2	3.00519	FUT9	3.51481	NOL4	3.64518	SHC2	3.02632
808	RNF115	2.63325	CXCL2	3.84268	TSFM	3.00331	AGMAT	3.51479	NMNAT3	3.64323	NUDT21	3.02573
809	FGFR3	2.63197	ARHGAP31	3.84131	KRT83	3.00309	PMM1	3.51473	LMO3	3.64304	OCA2	3.02539
810	TTC3P1	2.63159	CYBA	3.84124	TMIE	3.00169	MPPED1	3.51283	LINC00900	3.64283	ARPP19	3.02418
811	BIRC3	2.63094	GPRC5C	3.83728	ZNF689	3.00132	LRIF1	3.51088	TRMT12	3.63892	SEC16A	3.02148
812	ZNF219	2.63049	SLC3A2	3.83703	ARL15	3.00037	FAM102B	3.50913	LOC100130331	3.63865	SCO1	3.02142
813	DOK1	2.6293	LOC644936	3.83587	GRIA2	3.00023	AKT3	3.50824	EIF1AY	3.63818	ZCCHC2	3.01953
814	SYNGAP1	2.62838	DOK1	3.83519	HBZ	2.99907	PDLIM7	3.50709	KRBOX4	3.63768	EXOC5	3.01876
815	GREB1L	2.6275	CDC42	3.83439	DCTPP1	2.99602	ATP5PF	3.50673	2004-03-01	3.6364	BDNF	3.01698
816	ZFHX3	2.6235	P4HA1	3.83432	C16orf87	2.9958	SMKR1	3.50637	KCNG1	3.63598	LGALSL	3.01695
817	TMSB15A	2.62296	MORN2	3.83392	RNF112	2.99459	PLA2G4A	3.50476	CDH11	3.63508	RTN4RL2	3.0168
818	SMIM30	2.62158	ADSL	3.83279	RNF11	2.99424	GPI	3.50055	PLXNC1	3.63485	GPRASP1	3.01555
819	DOCK9	2.62118	C3	3.83201	ENSA	2.992	SUB1	3.49641	GNG2	3.6333	BBC3	3.01525
820	BFSP1	2.62039	MRO	3.83048	PIK3R1	2.99042	MRFAP1L1	3.49621	ANKRD50	3.63061	UBE2E2	3.01445
821	MTMR1	2.62008	SPARC	3.8304	SLC30A3	2.99026	SENP3	3.49325	WDR77	3.62898	FAM104A	3.01374
822	CREG1	2.61945	SIGIRR	3.82908	FN3KRP	2.98905	SYTL2	3.4923	HACD4	3.62887	NNT	3.01336
823	THBS1	2.61902	PALLD	3.82898	RDH12	2.98889	DYNC1I1	3.49211	FLRT1	3.62774	AMBRA1	3.01002
824	LOC728485	2.61794	MPZL1	3.82894	LOC389895	2.98866	USP6	3.49183	EDARADD	3.62527	PTK2B	3.00968
825	CYBRD1	2.61646	PYDC1	3.82781	RTN4R	2.98748	RNF219	3.48888	YAP1	3.62428	CD200	3.00732
826	ARL9	2.61415	DSEL	3.82721	CCDC85A	2.98674	SUV39H1	3.48847	PIK3CD	3.61929	MTMR12	3.00705
827	HSPD1	2.61406	COCH	3.82477	TUBB6	2.98616	C2CD2	3.48805	VAT1L	3.619	CREB3L3	3.00693
828	AFF2	2.61182	GLUD2	3.82412	NFE2L1	2.98616	ZNF689	3.48757	DSEL	3.61775	NKD2	3.00689
829	SEC11C	2.60689	PPARA	3.82372	MEST	2.98353	TMEM184B	3.48709	BRMS1L	3.61586	TXNRD1	3.00587
830	GFRAL	2.60606	ABCC6	3.8227	HRH1	2.98335	CDKN2AIPNL	3.48665	HECTD2	3.61388	FAM131A	3.00324
831	RPS24	2.60573	ZDHHC12	3.82165	RAB35	2.98287	METAP1	3.48529	MRPL20	3.61078	HPRT1	3.00311
832	GPSM3	2.60545	RPS10	3.81871	IPCEF1	2.98217	PKDCC	3.48354	ATP6V1H	3.61056	PDS5A	3.00281
833	LINC00461	2.6053	CERS1	3.81734	SMPX	2.98157	NOL4	3.48319	SOWAHA	3.6077	CBLN2	3.00272
834	DDA1	2.60529	CCR1	3.8155	DPP6	2.97856	ACOT4	3.48296	DCP2	3.60695	ADAM11	3.00221
835	SLC17A8	2.60494	ARL3	3.81531	GRIN1	2.97723	TANGO6	3.48263	PCSK5	3.60562	TGFBR3L	3.00187
836	BTG1	2.60169	SOX9	3.81099	SYTL2	2.97716	SLC49A3	3.48262	FGGY	3.60536	OPTN	3.00091
837	STARD3NL	2.60087	MOB1B	3.80429	PPP2R5E	2.97684	SOWAHB	3.48232	AGA	3.60481	DNAJC13	2.99511
838	DOCK8	2.59752	TMEM9	3.80399	LOC728485	2.97678	GAP43	3.48034	C1orf226	3.60031	RITA1	2.99447
839	TKFC	2.59622	WTIP	3.79618	OAT	2.9747	ARTN	3.47943	GLT8D2	3.59406	AKR7A2P1	2.9942
840	LOC440434	2.59542	GIMAP2	3.7952	CUL4A	2.97236	ZFAND2A	3.47927	FAM107A	3.59395	HIVEP1	2.99202
841	ICAM5	2.59436	ETF1	3.7922	PTER	2.96897	CD6	3.47869	OCA2	3.59125	C1orf35	2.99148
842	HNRNPC	2.59335	HMGCL	3.79037	CCDC24	2.96832	RDH12	3.47582	LOC642852	3.58821	PEX5L	2.9894
843	ACTR3C	2.59306	PRMT2	3.79029	TPMT	2.96585	STXBP5	3.47536	DOCK9	3.58811	PEBP1	2.98814
844	FCER1G	2.59202	DNAJA4	3.789	GSKIP	2.96564	HACE1	3.47459	C12orf76	3.58798	SCN3B	2.9843
845	SPATA18	2.59151	C2orf69	3.7885	GNPTAB	2.96552	JTB	3.4739	TCF7L1	3.58611	STARD4	2.98315
846	TMEM91	2.59027	BTBD9	3.7885	HMGCR	2.96465	DDRGK1	3.47135	BCRP2	3.58498	NEDD4L	2.98117
847	PPP2R5C	2.58938	GABRA3	3.7869	CYP1B1	2.96181	CHST10	3.47058	TRO	3.58484	GRB10	2.97929
848	VAV2	2.58934	RGS18	3.78675	GPRASP1	2.96102	SKAP2	3.46949	DCAF4	3.58474	RTL8C	2.97918
849	SPG21	2.58848	NAT16	3.78502	MBD1	2.95834	PTGES	3.46948	LINC00461	3.58257	BCKDK	2.97266
850	RPL10A	2.58797	ENHO	3.78449	SESN1	2.95803	YRDC	3.46947	PDE1A	3.58232	VSNL1	2.9725
851	RPL18A	2.58792	ERICH2	3.78291	GNB1	2.95613	SLC25A14	3.46932	LOH12CR2	3.58154	HIC2	2.97222
852	ME2	2.58628	C1QA	3.77486	PTDSS1	2.95577	PSMB5	3.46827	LOC101927752	3.58064	IFT122	2.97195
853	PMP2	2.58592	LAMTOR2	3.77364	F8	2.95526	CYP1B1	3.46709	NXN	3.57907	TMEM130	2.97107
854	HIRA	2.58499	IRX5	3.77355	HSPA12B	2.95298	ELOC	3.46424	HSPA13	3.57788	PDZD2	2.96993
855	ARHGEF26-AS1	2.5833	FBXO15	3.77339	KCNT2	2.95167	C1orf216	3.46017	SEMA4A	3.57746	SPIN1	2.96817
856	ST6GALNAC6	2.58306	DNAJC12	3.77312	LOC105379807	2.95154	COA6	3.45933	DDAH2	3.57592	EIF4ENIF1	2.96724
857	CFAP70	2.58257	GLO1	3.77231	ADCK1	2.9481	HK1	3.45575	RMI2	3.57487	PDE1A	2.9664
858	MYO7A	2.58153	HSD17B8	3.77132	ACTR3B	2.94682	TBL1XR1	3.45327	WDR31	3.57395	AGRN	2.96635
859	ZNF667-AS1	2.58039	MIR7515HG	3.77118	SYP	2.94418	CLCN6	3.45268	GMFG	3.57225	SPRED1	2.96537
860	BTN3A1	2.57817	C1orf61	3.77068	KCNJ4	2.9407	GAL	3.45242	C17orf67	3.56805	DLG4	2.96504
861	CADM1	2.57757	TMEM167A	3.76777	HBQ1	2.94019	DUSP19	3.44897	CHL1	3.56413	ARPC4	2.96496
862	FZD2	2.57666	TBXA2R	3.76376	CYP46A1	2.94001	TMX4	3.44568	CDC42BPB	3.56413	STAT4	2.96413
863	B3GNT4	2.57458	FAM207A	3.76295	TNFSF13B	2.93827	MRPS24	3.44471	ARNT2	3.56297	NSD3	2.964
864	DUSP5P1	2.57441	EFEMP1	3.76176	FDX1L	2.93797	EIF6	3.44367	CENPF	3.55932	BCL2L13	2.96246
865	AKIRIN1	2.5721	MED24	3.76153	ELP3	2.9378	SLC25A3	3.44284	GRB14	3.55807	LSM14B	2.96087
866	GALNT18	2.56666	FAM167A	3.76013	NNMT	2.93747	CNN1	3.44234	ARL16	3.55775	KIAA1211L	2.95773
867	TTC7B	2.56537	GPSM3	3.75609	CDKN3	2.93736	EFNA3	3.44166	LOC100507351	3.5573	FMR1	2.95638
868	SMAD2	2.56367	CD86	3.75504	DGKI	2.93699	TMTC3	3.44059	MACROD2	3.55673	TNFAIP1	2.95323
869	SETD4	2.56205	ZNF157	3.75489	CLEC4G	2.93374	STK32C	3.43996	TXLNB	3.55593	ADGRB1	2.95234
870	AK8	2.56089	RNF135	3.75073	CDKN2D	2.93312	SFTPD	3.4394	NACC1	3.55441	GGA3	2.95191
871	HMGB1	2.5602	MBNL3	3.75051	BABAM1	2.9326	SNTB2	3.4388	CCDC6	3.55369	RIMBP2	2.95119
872	IKBIP	2.55905	LINC01547	3.74842	SNCA	2.92824	KRAS	3.43785	TPRG1L	3.55282	MBOAT7	2.95054
873	DTD1	2.55883	CCDC189	3.74755	TMEM205	2.92715	E2F1	3.43532	SLC2A12	3.55063	FAM182B	2.95051
874	ZNF611	2.55747	EIF4EBP1	3.74697	ATXN7L3	2.92679	CTC1	3.43474	GPM6A	3.54963	WIPI2	2.95039
875	NDUFB6	2.55549	NIPSNAP1	3.74639	HECTD4	2.92676	HERC1	3.43439	LYPD1	3.54784	ZZZ3	2.94932
876	DIRC2	2.55508	PIPSL	3.746	VPS25	2.92661	CCDC124	3.42881	DACT1	3.54716	GGN	2.94877
877	BTG3	2.55443	PPP1R32	3.74353	UBR3	2.9255	DUSP6	3.42842	BORCS5	3.54687	ASGR2	2.94694
878	ATOH7	2.55273	LOC101928370	3.74273	BABAM2	2.92367	SLC25A44	3.42772	KRT86	3.54579	CRIM1	2.94115
879	TTYH3	2.55241	FCGRT	3.74184	EGFL7	2.92084	VAPB	3.42711	LINC01485	3.54525	CX3CL1	2.94075
880	TNR	2.55079	BIRC3	3.74084	DMXL2	2.9184	MAP2K1	3.42679	ROBO2	3.54318	RAB9B	2.93819
881	OS9	2.55072	BABAM2	3.74033	GNPNAT1	2.91809	PSMB6	3.42619	BTRC	3.54037	ETS2	2.93737
882	LAPTM5	2.55072	ZNF667-AS1	3.73996	DKK3	2.91647	DACH1	3.4249	TLDC1	3.53686	TRMT12	2.93451
883	THRA	2.55014	C11orf65	3.73994	LOC100507351	2.91348	C8orf46	3.42469	RASL10A	3.53676	YWHAZ	2.93406
884	RGS8	2.54814	RHPN2	3.7383	CNTN1	2.91131	ALG13	3.42423	ARHGAP5-AS1	3.53266	ZWILCH	2.93311
885	BHMT2	2.54806	ECH1	3.73685	FAM160A2	2.91082	RPRM	3.42306	FGFBP3	3.53233	NEUROD1	2.93294
886	TRIL	2.547	PYCR3	3.73481	FAM13A	2.90954	C19orf47	3.42204	FAM117A	3.52842	ANKLE2	2.93072
887	LXN	2.54638	NR0B1	3.73246	ORC6	2.90869	KCNH5	3.42104	TXNL4A	3.52811	SPINT2	2.92962
888	LINC01551	2.54599	CTXND1	3.73216	HIC2	2.90826	TM2D3	3.41954	DPP10	3.52645	NPTX2	2.92894
889	SMS	2.54592	FIBIN	3.73023	SPINT2	2.90754	NMT1	3.41876	FAM131A	3.52365	ARID5A	2.92783
890	NR2E1	2.54392	CRYZL1	3.72509	LINC00680	2.90734	TACC1	3.41749	ADAMTS8	3.52158	RAB27B	2.92718
891	HLA-J	2.54374	GRID2	3.72452	SLC26A4-AS1	2.90701	SNRPB	3.4167	SHC2	3.51708	SYCE1	2.92645
892	CDV3	2.54305	VPS26B	3.72083	MB21D2	2.9035	PKIG	3.41461	UMPS	3.51443	ANKRD33B	2.92493
893	SOX9-AS1	2.54181	MINOS1	3.72043	IL12RB2	2.90309	ARHGAP29	3.41454	GGTA1P	3.51062	DAGLB	2.92438
894	IGSF6	2.54108	SSBP1	3.7198	SUB1	2.9014	PRDM12	3.41199	FAM129B	3.51036	ARTN	2.92421
895	AK6	2.54097	HLA-DRB5	3.71914	ETS2	2.90137	NEDD8	3.41065	AP2B1	3.51022	DISP2	2.92379
896	HLA-G	2.54	FCGR3A	3.71757	TRIM49	2.90084	ZNF607	3.4106	PRRG3	3.50694	C14orf28	2.92367
897	AKIRIN2	2.53848	MEIG1	3.7152	RSL1D1	2.89765	GPN2	3.40973	LOC100506100	3.50466	LINC02217	2.92327
898	PTBP3	2.53793	EMG1	3.71411	ZDHHC23	2.89568	FZD3	3.40928	C16orf58	3.5045	KCNN2	2.91635
899	PEX2	2.53772	LYRM1	3.71361	FBXW2	2.89496	CD52	3.40753	PLS3	3.50352	ATP6V1G2	2.91496
900	ENO1	2.53577	CHMP1B	3.71316	PCDH19	2.89437	ZNF18	3.40713	IL13RA2	3.50212	CDKL1	2.91477
901	AKTIP	2.53425	PCYT1B	3.71274	BCL7B	2.89203	ENTPD6	3.40589	SNX13	3.5006	RAB26	2.91364
902	HMGN3	2.53417	DCAF11	3.71123	DACH2	2.89163	SVOP	3.40584	BLCAP	3.49871	GBAP1	2.91294
903	LINC00842	2.53405	SPATA1	3.71101	SEC61A2	2.89021	SRP19	3.40495	LOC103344931	3.49676	RETREG1	2.9128
904	GLO1	2.53376	FCER1G	3.70792	TASP1	2.88876	TRAPPC3	3.40372	SLC9A6	3.49659	DCC	2.91269
905	HHEX	2.53321	TLR2	3.70784	MDH2	2.88729	TAPT1	3.40197	RTBDN	3.49425	ATG9A	2.91266
906	SCD5	2.5318	CKS1B	3.70656	ARHGAP29	2.88473	SNCA	3.40196	PPP2R5C	3.49286	AZIN2	2.90916
907	NUS1	2.53025	AK6	3.70646	CELF5	2.88443	FBXO22	3.40052	MEST	3.49198	MAP2K4	2.90801
908	LST1	2.53006	HHEX	3.70448	LINC01547	2.88281	NECTIN1	3.3989	FAT1	3.49116	RAB3GAP1	2.90591
909	WSCD1	2.52989	RPL7L1	3.70428	ANO5	2.88141	CSPG4P1Y	3.39669	ADAMTS19	3.48945	ADCY7	2.90555
910	NBDY	2.52965	ATP6V1H	3.70364	CLTB	2.8809	SUSD5	3.39641	MR1	3.48835	UBQLN4	2.90532
911	DLG2	2.52959	CACFD1	3.70116	IGSF3	2.87872	PTRH1	3.39612	PCOTH	3.48788	TMEM198	2.90439
912	PARVA	2.52951	BCAS2	3.70115	DOCK9-AS2	2.8785	GP9	3.39586	ADGRG1	3.48418	ADCK5	2.89978
913	ELFN2	2.52728	MYL5	3.69943	ARHGEF9	2.87817	TASP1	3.39528	GRM1	3.4823	PLEKHM3	2.89967
914	IFITM2	2.5271	FAM32A	3.69936	BTBD9	2.87807	UQCRH	3.39395	GPI	3.48225	NTRK3	2.89911
915	RAB13	2.52653	SIRT3	3.69594	NRXN3	2.87335	CDK5	3.39342	NDST3	3.48209	VPS37B	2.89908
916	IFI27L2	2.52583	SLIT1	3.69481	ZDHHC7	2.87329	TSPAN17	3.39161	SIDT2	3.48123	TSPAN17	2.89722
917	SOX5	2.52335	ZFHX3	3.69127	FZR1	2.87326	B4GALNT1	3.39157	PKD2L1	3.48072	PANK2	2.89716
918	FTL	2.5225	ZNF185	3.69023	FADS3	2.86864	NLN	3.39087	IQSEC2	3.48004	LRRC73	2.89468
919	NDUFC2	2.52004	DNPEP	3.6902	KIAA1211L	2.86842	GABARAPL1	3.38745	TUBB4B	3.47818	CCSAP	2.89425
920	GAL3ST4	2.51964	IL17RB	3.68921	TMEM70	2.86777	TYRO3	3.38562	DERL2	3.47631	VLDLR	2.89414
921	BLNK	2.51915	MLEC	3.68911	AP2A2	2.8658	MMP17	3.38532	RGS4	3.47551	PDE4C	2.89332
922	AOAH	2.5184	WFS1	3.68744	HS6ST1	2.86552	BCKDK	3.38399	SLC16A9	3.47461	FAM173A	2.8897
923	MPDZ	2.51734	GASAL1	3.68567	FARSB	2.86534	ARL4D	3.38374	NPPA	3.47343	SRGAP3	2.88683
924	SEC61B	2.51699	MZT2A	3.68514	TTC9	2.86531	DRG1	3.38273	RPA2	3.47269	CANT1	2.88629
925	MAPKAP1	2.51636	RPL22	3.68426	CASQ1	2.86455	MRPL46	3.38103	OPTN	3.46973	FRS3	2.88594
926	CRCP	2.5153	PCK2	3.68372	KCNAB1	2.86149	HTR5A	3.38057	PTGER4	3.46583	ELAVL4	2.88226
927	UPRT	2.51519	SST	3.6837	SYNGR1	2.8605	ZC2HC1C	3.37966	MT1M	3.46464	SEMA6B	2.88017
928	SHISA7	2.51505	CLDN10	3.68308	CFL1P1	2.86017	C11orf49	3.37936	NAV3	3.46445	TMEM108	2.87917
929	PALD1	2.51474	PLB1	3.68069	AMER3	2.85898	CDK20	3.37924	SNTB1	3.46298	DNAJC7	2.87804
930	IFI27L1	2.51443	CREM	3.67955	ACSL4	2.85678	NEU1	3.37715	HTR2C	3.46118	RAB3C	2.87799
931	PLPPR4	2.51363	MEGF11	3.67863	MTMR6	2.85655	TNFRSF14	3.37627	SPICE1	3.46078	FIP1L1	2.87763
932	SLC35G3	2.51338	MCFD2	3.67855	C1S	2.85572	STYK1	3.37434	RIMBP2	3.46035	TDRD7	2.87554
933	C3	2.51308	SERF2	3.67794	SYNPO2	2.85489	RPUSD3	3.37424	CNRIP1	3.45996	OLFM4	2.87552
934	TGFBR3	2.5093	MZT2B	3.67631	CUL9	2.85385	ZNF827	3.37268	TMEM176B	3.45972	CORO1A	2.87513
935	2003-09-01	2.50914	MLLT1	3.67609	F12	2.85374	ARL6IP5	3.37191	MPP2	3.45852	NUAK1	2.87512
936	FAM199X	2.50839	LHFPL3	3.67539	EPHA10	2.85178	STK24	3.36983	MRPL10	3.45714	GNPTAB	2.87418
937	COPS8	2.50694	STX7	3.67401	CPEB1	2.85123	GFPT1	3.36907	LYRM2	3.45565	CDC42BPB	2.87307
938	LRRC36	2.50659	MRPS6	3.67386	BRF2	2.84977	CRSP8P	3.36762	ARL15	3.45489	YBX2	2.87048
939	AMZ1	2.50545	GRIN2C	3.67295	ADCYAP1	2.84863	IGSF21	3.36512	MBOAT2	3.45465	CDC27	2.87018
940	PYGM	2.50359	GABRB1	3.67021	TPM3	2.84854	NPTX2	3.36397	DNAJA4	3.45436	FSD1	2.86981
941	B4GALNT4	2.50356	ADRA2C	3.66861	TMEM121B	2.84491	TMEM130	3.36323	TMEM117	3.45369	PCDHB17P	2.86947
942	LYRM2	2.50326	SSR4	3.66787	PPM1H	2.84443	PEX14	3.36178	DPYD	3.4519	LRFN3	2.86857
943	CACNA1H	2.50311	RPL6	3.6676	ASTN1	2.83955	ZNF576	3.35885	FAS	3.45172	PGRMC1	2.86834
944	LINC01736	2.50242	BCKDHB	3.66705	RASL10A	2.83748	LSM10	3.35862	CNMD	3.44981	PRDM12	2.86823
945	SPNS3	2.50228	LINC02381	3.66703	SH3GL2	2.83606	PREPL	3.35753	MAOB	3.44955	CACNG3	2.8667
946	SCN7A	2.50195	ASS1	3.66568	ACAT2	2.83571	ZNF329	3.35714	GLP2R	3.44756	FLRT2	2.86128
947	LINC00319	2.50176	FKBP1A	3.66551	TBC1D22B	2.83507	TMEM177	3.35686	TNNT1	3.44632	TTC5	2.86122
948	DDX54	2.50043	TDRD9	3.66377	FABP3	2.83494	LCLAT1	3.35436	MCFD2	3.44615	SH3GLB2	2.85945
949	CETN3	2.49857	CYB5A	3.66364	CDKN2AIPNL	2.83418	PISD	3.35193	MAPK1	3.44478	MEST	2.85795
950	ZDHHC24	2.49767	HLA-DRB1	3.66203	TUBB	2.83409	NSD2	3.35098	PYCR1	3.44258	AKAP11	2.85671
951	FGD1	2.49707	CD4	3.66123	C1D	2.83171	NPPA	3.3504	NNAT	3.44255	PEX11B	2.85358
952	MINCR	2.49611	SWI5	3.66111	CARNMT1	2.83084	C1QL3	3.34988	USP46	3.43935	GNB1	2.85345
953	DTNBP1	2.49488	TTC7B	3.6596	MAEL	2.82977	DNAJA3	3.34599	NTSR2	3.43929	NAPB	2.85213
954	CNPY2	2.49193	BEST4	3.65945	ZNF138	2.82778	DOCK4	3.34555	DPCD	3.42951	DEPDC5	2.85211
955	RAB34	2.4919	FBXL18	3.65814	FIBP	2.82676	C9orf129	3.34384	DENR	3.42807	KCNMA1	2.8508
956	TTR	2.49147	HTR1A	3.65775	SNX33	2.82651	YIPF2	3.34274	COCH	3.42776	ELP3	2.85039
957	EIF4EBP1	2.49134	GSTM2P1	3.65615	FAM173A	2.82646	ENPP5	3.34237	ZNF727	3.42699	RAB36	2.84865
958	LRRIQ1	2.48933	GPT2	3.65534	BRWD1	2.8262	KANSL3	3.34083	HYI	3.42176	OPRM1	2.8482
959	AIF1	2.48866	WFDC3	3.65445	EXO5	2.82566	ABCF1	3.33711	PGM2L1	3.41972	MICAL2	2.84727
960	ASIP	2.48852	STX17-AS1	3.65123	GPR171	2.82478	NUDT18	3.33676	SAP30BP	3.41736	PTPRK	2.8457
961	TAPBPL	2.48844	TUBB2A	3.64877	SLC4A10	2.82308	UBE2M	3.33582	SRR	3.41343	SLC16A14	2.84387
962	MPEG1	2.48704	RPL4	3.64793	GLT8D2	2.82301	BEX1	3.335	RTL6	3.40828	METTL9	2.84276
963	STON2	2.48683	CRHBP	3.6478	SLC17A7	2.82216	SYT13	3.33468	CFAP70	3.40781	UBXN10	2.84237
964	SUGCT	2.48576	LARS2	3.64763	KCNH5	2.82183	DPY19L1	3.33272	APAF1	3.4066	ZFYVE1	2.84115
965	TMEM35B	2.48539	SMIM30	3.64697	C11orf49	2.82094	NMU	3.33254	TEKT2	3.40493	SLC30A3	2.84107
966	CYBA	2.48456	NEDD4L	3.64666	TACC1	2.8204	CDH10	3.33245	SLC2A4RG	3.40435	ENDOV	2.83992
967	EXOC4	2.4845	GTPBP4	3.64318	PLA2G4A	2.81967	MPP2	3.32915	STX7	3.4017	TTC9	2.83874
968	RAP2B	2.4827	GABRA5	3.64006	SERPINB2	2.81929	SYP	3.32875	BRK1	3.40108	CA4	2.83704
969	RIPOR2	2.48248	TCF7L1	3.6398	PRKCG	2.81858	EPHA10	3.32842	KIRREL3	3.40053	ASS1	2.83636
970	MBNL3	2.48209	COPZ1	3.63858	ST8SIA3	2.81844	ISLR2	3.3266	GOLGB1	3.39868	AMER3	2.83401
971	SLC9A7	2.48188	RBFA	3.63831	TMTC3	2.81807	FAM49A	3.32597	GFM2	3.39673	PYCR3	2.83326
972	MAN1B1-AS1	2.48178	LINC00886	3.63727	TXNRD1	2.8179	BCL2L13	3.32514	MLC1	3.38957	SLC7A4	2.83091
973	ITGB7	2.48121	FXN	3.63616	TMEM181	2.81274	DIRAS2	3.32343	C3orf14	3.3875	TUBB6	2.8306
974	HBZ	2.48029	SMO	3.63547	TAF9	2.8109	HMOX2	3.32207	KCNJ12	3.38672	BCAR3	2.82934
975	SLC24A3	2.47988	CTR9	3.63415	PIP4K2B	2.81053	GDI2	3.32156	PHACTR3	3.38585	DLK2	2.82864
976	AGT	2.47871	UTP11	3.63362	LOC105376360	2.80875	KPNA2	3.31884	GSTM5	3.38518	TSPAN33	2.82642
977	CCDC153	2.47837	RAP1GAP	3.63343	HMOX2	2.80867	SCG3	3.31883	PPAT	3.38358	NAP1L5	2.82284
978	KIAA0100	2.47699	CD8A	3.63143	PRAF2	2.8082	ANO3	3.31773	HDGFL3	3.38266	ZBTB18	2.82269
979	ATP1B2	2.47657	METTL6	3.62968	TMEM56	2.80743	KHDRBS3	3.31745	CABCOCO1	3.38204	GAS7	2.81747
980	TG	2.4759	LOC105372480	3.6286	PITPNM2	2.80663	FAM131A	3.31701	USF3	3.38195	SHROOM3	2.81656
981	PRPS1	2.47527	ANO2	3.62851	KCNH2	2.80032	FDPS	3.31683	PAX6	3.37991	TRPC5	2.81616
982	SIRT3	2.47389	HCLS1	3.62567	NRDC	2.7995	TOX4	3.3163	ADCY7	3.37932	MCTP1	2.81579
983	HCST	2.47339	ZIC5	3.62497	PNPLA6	2.79832	NRBP1	3.3129	SPRN	3.37884	CLVS1	2.81505
984	TBC1D14	2.47325	SLC17A8	3.62444	NPM3	2.7959	TMEM160	3.31127	KCNK1	3.37768	POMGNT2	2.81429
985	SLC25A22	2.473	LOC107984035	3.6221	AMFR	2.79584	TUFT1	3.31015	LAMB1	3.37687	PCDH1	2.81223
986	SDC2	2.47152	RAB35	3.62074	GRSF1	2.7951	2001-03-01	3.30837	KIF3C	3.37463	ZFP62	2.81197
987	POMP	2.47094	SAT1	3.61998	CBLN4	2.79347	EXOSC5	3.30803	FOXRED2	3.37223	CUL2	2.81193
988	GTF2IRD2	2.47046	MLNR	3.61942	SCN3B	2.79303	PI4KB	3.30614	MAPK8IP1	3.37197	KLF8	2.81026
989	SRP9	2.47029	IL34	3.61789	RPAP3	2.79275	ATP6V1C1	3.30501	SNX3	3.3703	SLITRK1	2.8102
990	TLR1	2.46916	RNASEH2A	3.61258	UMODL1-AS1	2.79161	SPRYD3	3.30455	SIL1	3.37017	HSP90AB1	2.80934
991	AGAP1	2.46816	TRIB1	3.61258	MPND	2.79096	MFSD4A	3.3024	TNNI3	3.36948	FEM1C	2.80746
992	TERF2IP	2.46812	HS2ST1	3.61194	RAP2A	2.79045	LOC105379807	3.30206	ARHGAP4	3.36934	CAPS2	2.80634
993	HAVCR2	2.46527	ST13P4	3.61034	CYFIP2	2.78969	ARPC4	3.30139	JAKMIP1	3.36766	FOXP4	2.8056
994	TH	2.46462	PSD	3.60945	C9orf129	2.78966	DCUN1D3	3.30116	DTNBP1	3.36674	EPOP	2.80498
995	GOLGA2P7	2.46421	ZCCHC12	3.60657	FAM234B	2.78891	MDH2	3.29986	PCBP3	3.36664	GFPT1	2.80386
996	IQCH	2.46342	ZNF831	3.60579	PSMD11	2.78785	CAMLG	3.29774	GPD2	3.36459	CCDC30	2.80309
997	FAM172A	2.46221	TEAD3	3.60464	UBFD1	2.78761	STEAP2	3.2976	RTN3	3.35888	ZNRF2	2.8024
998	PDPK1	2.46089	LOC100130331	3.60153	TBRG4	2.78736	STMN2	3.29743	C12orf45	3.35753	FAM122A	2.80064
999	PPP5D1	2.46032	PLTP	3.59989	TNPO2	2.78724	TSHZ2	3.29627	LOC101927811	3.35748	TMEM106C	2.80055
1000	ATF5	2.45966	NDUFA6-AS1	3.59964	COL4A3BP	2.786	MRPL18	3.29458	CCDC8	3.35472	PAK3	2.80046
1001	NHLRC1	2.45949	PRSS23	3.59747	ARMCX1	2.78535	FOXRED2	3.29231	PUF60	3.35421	LINC01547	2.80009
1002	PTPRC	2.45843	NFIB	3.59739	PRKCZ	2.7829	GFM2	3.2922	CBLN1	3.35351	TMEM87B	2.79915
1003	PLIN5	2.45682	ECHS1	3.5966	LCMT1	2.78258	BRK1	3.29055	E2F5	3.35329	HSPH1	2.79903
1004	RGS10	2.45621	HNMT	3.59554	BUB3	2.78247	GPR171	3.29039	AMN1	3.35291	IGSF3	2.79869
1005	TRAF3IP3	2.45541	LCN12	3.59511	PEX5L	2.78198	MEA1	3.29032	SEC61A2	3.35218	ERH	2.79799
1006	RIDA	2.45391	YPEL1	3.5946	MECR	2.78037	ZMYND19	3.29026	SHC3	3.35064	STMN1	2.79792
1007	RSPO4	2.45252	ROM1	3.59343	NAA30	2.78004	CD83	3.29015	HEBP1	3.35016	RXFP1	2.79684
1008	CAPS	2.44968	COPS8	3.59223	MAGIX	2.77951	RTL8A	3.28926	RCN2	3.34524	TMEM260	2.79627
1009	PRKG1	2.44922	EML4	3.59089	PCNX1	2.77904	EXOSC4	3.28915	CHMP1B	3.34439	JMJD1C-AS1	2.79547
1010	ARRB2	2.44705	TFG	3.59029	RPRD1B	2.77869	STK16	3.288	GTPBP4	3.34427	PCDH8	2.79535
1011	PHF12	2.44665	NUTF2	3.58952	DNAJA3	2.77852	GNPNAT1	3.28703	ADGRA3	3.34416	PPP3R2	2.79428
1012	EIF3F	2.44466	GPR183	3.58838	DCUN1D4	2.7785	TMEM150C	3.28548	SRGAP1	3.34246	ZFR2	2.79072
1013	KIAA1257	2.44455	PLEKHA4	3.58773	MARK1	2.77822	TIMM44	3.28545	ICE1	3.34016	BAIAP3	2.79056
1014	RPLP1	2.44409	LINC01088	3.58021	TRMT2A	2.77585	NRDC	3.28541	GUK1	3.3384	UNC5D	2.79029
1015	CAPRIN2	2.44333	MGAT4B	3.58007	THAP11	2.77581	FIG4	3.2837	TMED10	3.3384	EIF2S1	2.78846
1016	PYCARD	2.44167	CXCL3	3.57855	MIEF2	2.77541	PNMA6A	3.28251	MGAT4B	3.33607	SCO2	2.78813
1017	RGS22	2.44125	PRPS1L1	3.57636	B9D1	2.77426	CTSB	3.28124	GGCX	3.33544	PRKACB	2.78629
1018	AP3D1	2.44068	MRAS	3.57541	HIF1AN	2.77357	CDC37	3.28052	PSENEN	3.33533	ERFE	2.78148
1019	TM2D1	2.44047	C1orf122	3.575	TMEM65	2.77267	GALNT9	3.28025	NPY5R	3.3318	PCDHB2	2.77968
1020	RAPGEF1	2.44037	LOC101927420	3.57433	ZNF503	2.77008	NRSN1	3.2798	IGFN1	3.32948	PSPC1	2.77535
1021	ZNF236	2.43821	CDO1	3.57332	DGCR5	2.76708	LYSMD1	3.27955	B3GNT4	3.32676	CSPG4P1Y	2.76938
1022	EFR3B	2.43734	SLC26A4-AS1	3.57295	DNM3	2.76647	UNC13A	3.27645	KLRG1	3.32563	FXYD6	2.76921
1023	CABLES1	2.43669	SFMBT2	3.57259	EPHA4	2.76613	IPCEF1	3.27573	KIAA1024	3.32535	DPH2	2.76887
1024	TMEM8B	2.43405	LINC01197	3.57191	TMSB10	2.76504	GNB1	3.27563	CNPY2	3.32448	CITED4	2.76846
1025	NISCH	2.43279	TFPT	3.57149	RAB26	2.76386	NFE2L1	3.2734	FAM86FP	3.32313	KATNAL1	2.76717
1026	ACTR3	2.43246	ADA2	3.56997	KIRREL2	2.76282	ETS2	3.27337	PYDC1	3.32091	PCDH19	2.76561
1027	C1orf54	2.43115	CARMIL3	3.56718	CHAF1B	2.76082	SNRNP25	3.27282	B4GAT1	3.32077	SSTR2	2.76402
1028	VPS51	2.42681	TMEM120A	3.56689	OPRM1	2.76016	CSGALNACT1	3.27243	TMEM8A	3.31933	LOR	2.76397
1029	MT2A	2.42637	EFNB2	3.56675	PJA1	2.75994	CPNE5	3.2718	GGN	3.3193	SMARCAL1	2.7631
1030	EDNRB	2.42587	CMIP	3.56672	SURF2	2.75937	RAB26	3.27013	HBZ	3.31901	AKIP1	2.76286
1031	SIM2	2.42571	PLPPR3	3.5656	ATP23	2.75801	IER5L	3.26996	SLC39A12	3.31841	TUBB2A	2.76135
1032	OLFML3	2.42557	NCF1C	3.56464	KLHL18	2.75789	FAM19A1	3.26853	DIRC2	3.31806	IGSF21	2.76054
1033	DENND2C	2.42556	MMP28	3.56418	AQP11	2.75746	CYP2E1	3.268	ACSF2	3.31772	CMAS	2.75999
1034	LINC00260	2.42491	LINC00595	3.56375	CLPB	2.75619	PNLDC1	3.26789	NELFE	3.3177	NR2F6	2.75964
1035	SLC41A3	2.4223	IKBIP	3.56367	SNN	2.75503	TTC19	3.26789	TSPAN33	3.31698	CELF3	2.75944
1036	LDOC1	2.42155	CASTOR1	3.56211	ARL6IP5	2.75157	DPYSL4	3.26511	CRSP8P	3.31394	TTF1	2.75932
1037	FIBIN	2.42128	ETFB	3.5602	SMKR1	2.75031	SLC26A4-AS1	3.26241	RPL12	3.31364	SH2D2A	2.75744
1038	FCGR2A	2.42016	ZNF525	3.55904	CCT4	2.74769	ELAVL2	3.26201	DIAPH3	3.30928	CAMK2A	2.75729
1039	ASH1L-AS1	2.41943	PTPRA	3.55857	ANXA11	2.74747	MYO1B	3.26145	NEK6	3.30502	KLHL42	2.75584
1040	RNF5	2.4175	RPS26	3.55763	LRRC8B	2.74722	QPCT	3.25661	PELI1	3.30477	CPNE5	2.75529
1041	CARMIL3	2.41658	CPNE7	3.55212	ZC3H12B	2.74697	PRKDC	3.25178	TNFRSF14	3.30434	MFSD13A	2.75503
1042	EAF2	2.41604	AMZ1	3.55121	GDF10	2.74687	PRDM10	3.25148	CCNL2	3.30189	MSANTD1	2.75493
1043	NIT2	2.41573	SYTL5	3.55055	ATOH7	2.74632	UQCRFS1	3.24756	EPB41L4B	3.29921	PLCH2	2.75127
1044	UBE2S	2.41506	PPIB	3.54703	LINC01197	2.7454	RMI2	3.24693	LINC00937	3.29873	CXXC5	2.75075
1045	PRODH	2.41493	HSD17B10	3.54581	NTRK3	2.74534	LMO3	3.24625	CTSO	3.29748	MAPK4	2.74899
1046	TCTN3	2.41479	NTAN1	3.54499	C16orf95	2.74461	PLEKHA1	3.24599	HSBP1	3.29748	RPRML	2.74893
1047	LYPLAL1	2.41212	RBM43	3.54209	LSM14B	2.74416	IMP3	3.24362	LOC100129291	3.29631	MLLT3	2.7475
1048	ALOX5AP	2.4106	CCDC28A	3.54175	LOC101927278	2.74402	TNPO2	3.24269	RAB6B	3.29281	AMFR	2.74689
1049	LINC00595	2.40963	RASAL3	3.53821	VPS13D	2.74333	PHF23	3.24167	LRRC56	3.29278	IPO5	2.74616
1050	PRKAG1	2.40931	STUM	3.5379	PGAM1P5	2.74262	TDRKH	3.24152	CD81	3.29183	MRPL28	2.7426
1051	NAT10	2.40867	ZNF516	3.53728	ATP2B4	2.73881	EIF4ENIF1	3.24125	MT1G	3.28971	SMC1A	2.74234
1052	LOC101928370	2.40827	LOC728739	3.53664	RHBDD2	2.73853	AK5	3.24113	DCAF5	3.28736	PTPRJ	2.74212
1053	MPPE1	2.40607	CCDC167	3.53655	RIT2	2.73847	HSPA13	3.24011	TRIM24	3.28646	XYLT1	2.74184
1054	SLC7A10	2.40603	2011-09-01	3.53546	LDB2	2.73766	NRN1	3.23798	LINC01547	3.28504	HDGFL3	2.74048
1055	PTPRA	2.40591	PSMB1	3.53102	AGK	2.7363	CORO1A	3.23591	PTBP2	3.28353	HES4	2.73826
1056	LINC01088	2.40428	IVD	3.5305	CAMKK1	2.73565	DMAC2	3.23431	NAA35	3.28306	FTCD	2.73789
1057	P4HA2	2.40385	FAR2P1	3.53045	GRINA	2.73497	STAU1	3.23392	GRM8	3.28133	TYRP1	2.73726
1058	ADRA2C	2.40364	KIF2A	3.52936	KIAA0368	2.73448	CCDC9	3.233	SLC22A3	3.27874	GRAMD4	2.73609
1059	SCAMP1-AS1	2.40312	BMP2K	3.52859	CCNYL1	2.73386	HEXIM2	3.2307	CELF3	3.27869	SLF1	2.73606
1060	FBXO41	2.40271	PCBD2	3.52828	GAP43	2.73368	BECN1	3.2306	EARS2	3.2751	SH3GL2	2.73272
1061	NTAN1	2.39881	ACO2	3.52796	NRN1	2.73282	THAP11	3.23054	IL12RB2	3.27494	CNTN3	2.73269
1062	NACAP1	2.3985	ME2	3.52674	HACE1	2.73262	PDE4C	3.22961	C1orf194	3.27476	DYNC1LI2	2.73235
1063	CCDC74B	2.39794	RAET1E-AS1	3.52459	COL10A1	2.7325	RTL8C	3.22957	CTH	3.2741	ZNF689	2.73206
1064	RPP30	2.39702	LOC100049716	3.52291	LOC105372480	2.73212	NDUFAF4	3.22765	TPD52	3.27407	PUS7	2.73075
1065	TSPAN3	2.39699	GGTA1P	3.52244	C8orf46	2.73154	POLE3	3.2267	DUSP5P1	3.27285	RNF111	2.73012
1066	MRC1	2.39532	XYLT1	3.52197	NUDT10	2.73091	IGSF3	3.22593	MIR99AHG	3.27057	PTPRF	2.72949
1067	PCDHGC5	2.39424	PLPBP	3.52025	LNX1	2.73028	TOM1L1	3.22548	PACSIN1	3.26884	RASAL1	2.72866
1068	GPR107	2.39176	CNOT7	3.51922	IQSEC2	2.72986	YWHAB	3.2254	ADORA2B	3.26715	MPPED1	2.72816
1069	PTGER3	2.39087	TSR3	3.51879	KCTD17	2.72927	AXIN2	3.22488	DEAF1	3.26689	RTN4IP1	2.72751
1070	TMTC1	2.39085	SKAP2	3.51785	UBE3A	2.72851	PSAP	3.22472	GPR150	3.26649	KCNH1	2.72704
1071	POLD2	2.39078	ORC6	3.51717	YJEFN3	2.72805	RAB3GAP1	3.22211	TTPAL	3.26567	CPNE7	2.72681
1072	RNF20	2.38997	SRP14	3.51672	ADAR	2.72774	CYP46A1	3.22182	RNF7	3.265	COQ8A	2.72667
1073	BTN2A3P	2.38981	IL13RA1	3.51632	LYPD8	2.72675	HAGH	3.21272	RER1	3.26282	C11orf49	2.72654
1074	KPNB1	2.38943	ENKUR	3.51538	CDC123	2.72597	NBEA	3.21192	OPRK1	3.26229	RAP2A	2.72591
1075	SYDE1	2.38816	MYB	3.51509	MSANTD1	2.722	PICK1	3.21189	VPS29	3.26102	ACTR3	2.72207
1076	PPARA	2.38676	ZMYND12	3.51469	FAM241B	2.72099	TMEM155	3.21166	RTN1	3.26018	SPCS3	2.72162
1077	STIM1	2.38667	EPHX1	3.51381	CAP2	2.7208	MED10	3.20933	JADE2	3.25909	ACTN1	2.72092
1078	PPP1R1C	2.38437	MYO1F	3.51327	HEMK1	2.7199	ZFP1	3.20841	SLC29A3	3.25768	SH3BP5L	2.71962
1079	CAMK2N2	2.38427	SRI	3.51273	C2orf69	2.71915	CRYBB1	3.20781	LOC101060391	3.25442	FSTL4	2.71916
1080	CRK	2.38423	PSENEN	3.5116	MIF	2.7152	F8	3.20709	IGSF22	3.25434	RSPO3	2.71912
1081	PLXDC2	2.38383	SLC16A5	3.51109	PDK2	2.71465	HSPB3	3.20636	SLC1A4	3.25414	ABR	2.71705
1082	LAIR1	2.38255	SEC22B	3.50691	USP32P2	2.714	COL4A3BP	3.20461	PHF24	3.2527	PCDH10	2.71651
1083	ERLIN2	2.38139	GRB2	3.50675	ZDHHC14	2.71328	KPNA4	3.2046	SPINT2	3.25265	MAPK14	2.71614
1084	ST13P4	2.38126	KCTD6	3.50223	HOPX	2.71194	NOP16	3.20356	PSME2	3.25096	BCL2L2	2.71585
1085	SHANK3	2.37996	PHLDB3	3.49922	TSN	2.7114	PHYHIPL	3.20238	SH2B3	3.24963	PKDCC	2.71474
1086	HLA-F	2.379	LSM4	3.49809	ZNF831	2.70732	WDR54	3.19981	A1BG	3.24744	COL10A1	2.71467
1087	ABCC6	2.37863	ZCRB1	3.49528	MNAT1	2.70718	FAM173A	3.1995	RIMS1	3.24733	LOC100507351	2.71371
1088	KLF16	2.37857	C1QC	3.49487	HPS6	2.70691	ZNF436	3.19809	ADGRB3	3.2465	PPAT	2.71365
1089	ISG15	2.37824	ENOX2	3.49245	TM2D3	2.70515	MIR22HG	3.19725	CAPRIN1	3.2452	TENM3	2.71364
1090	KIAA0319	2.37679	FABP3	3.49007	USP43	2.70316	CRIP2	3.19602	FAM49A	3.24261	CDKL5	2.71317
1091	CDK16	2.37618	SPA17	3.48855	SIRT5	2.70108	LDLR	3.19572	FAR2P1	3.24237	RNF112	2.71116
1092	GTF2H3	2.37597	HES5	3.48733	RGS14	2.70097	ZNF263	3.19564	KLF6	3.24139	TMEM268	2.71064
1093	FAM53C	2.37564	RAPGEF1	3.48578	ADRA1B	2.70022	EARS2	3.19559	TRAPPC6A	3.23913	PRKCE	2.7096
1094	EXOC3L2	2.3754	CDC16	3.48551	SYT13	2.6998	BNIP3	3.19415	PSMB2	3.23908	RASGRP2	2.70873
1095	NNAT	2.3741	SNX3	3.48495	PSMB2	2.6995	LRFN2	3.19365	DIAPH2	3.23856	EGR2	2.70446
1096	PPM1J	2.37397	EIF3F	3.48471	DCAF15	2.69928	HOMER1	3.19325	TUSC3	3.23566	NTN4	2.70281
1097	TDRD10	2.37372	DAD1	3.48374	PNCK	2.69924	EXOC6	3.19308	SLC7A11	3.23449	TRIM27	2.70271
1098	NANOS1	2.37348	MTA3	3.48321	COL11A1	2.69882	RABIF	3.19278	ANKLE2	3.23229	MYO1B	2.70166
1099	LINC00167	2.37334	FAM120AOS	3.48135	MKL1	2.69809	KCNC2	3.19223	GALM	3.23128	ZNF566	2.70112
1100	ACP1	2.37262	NDUFB6	3.4798	ALG13	2.69638	MDH1	3.18838	METTL5	3.23128	ZNF780A	2.70094
1101	LGR6	2.3726	VPS37D	3.47833	VEZT	2.69584	TMEM121	3.18801	BAALC	3.22785	LINC01197	2.70023
1102	C1orf220	2.37146	RSPH14	3.47759	TACO1	2.69545	SDHAF1	3.18773	DCLK2	3.2278	SPATS2L	2.70015
1103	RASSF8-AS1	2.37143	PTN	3.47491	HOMER1	2.6934	PSMG1	3.1877	CIB1	3.22752	NOL4	2.69927
1104	BCORP1	2.37114	FAM129A	3.4742	BBC3	2.69317	AP3B2	3.1871	ABI1	3.22644	DMTN	2.69704
1105	MYO1F	2.371	S100Z	3.47244	MCOLN1	2.69242	CYP26A1	3.18567	NDP	3.22605	RUNDC3A	2.69672
1106	MAP2	2.37079	TLR1	3.47243	GATB	2.69171	KLF6	3.18075	ZMAT1	3.22511	MAP3K12	2.69664
1107	SESN3	2.37033	RAPSN	3.47155	DIEXF	2.6911	LOR	3.18031	CCDC28A	3.224	MYADM	2.69572
1108	FXYD1	2.36899	LOC100129291	3.47125	NTNG2	2.68811	PTPRK	3.18012	PLPP4	3.22215	PRRG3	2.69517
1109	IGFBP5	2.36817	TBX19	3.46778	RTP1	2.68716	PPP3R2	3.17861	SFMBT2	3.21949	MFSD4A	2.69428
1110	TMEM97	2.36739	GSX1	3.46772	NIPSNAP3B	2.68638	TTPAL	3.17773	MAST3	3.21913	NUDCD1	2.69205
1111	CLEC4G	2.36688	RILPL2	3.46478	2004-03-01	2.68523	DNAJA2	3.1725	SGSM2	3.21549	CLTA	2.68968
1112	CD59	2.36602	MRPL37	3.46253	PPP2R1A	2.68405	PA2G4	3.17161	CALHM2	3.21007	ACVR1B	2.68942
1113	PNPLA8	2.36594	TNFAIP8L3	3.46182	SPON2	2.68339	DCTN3	3.17051	STX1A	3.20981	PLS3	2.68859
1114	HLA-DPA1	2.36554	LOC440434	3.46003	ISLR	2.68264	DNM1	3.17034	FSTL5	3.20852	FAM213B	2.68399
1115	MAMLD1	2.36528	CYBRD1	3.45786	STK16	2.68092	FBXL15	3.16913	ARPC4	3.20542	MED9	2.68276
1116	CILP2	2.36456	SLC35F2	3.45721	KIAA1468	2.68084	RBM18	3.16744	MRPS25	3.20515	MARK2	2.6827
1117	APOE	2.36424	GOLT1A	3.45646	DDX25	2.67993	PRPF19	3.16724	WDR17	3.20463	THAP8	2.68248
1118	HEPN1	2.36412	RBBP7	3.45585	TMEM121	2.67976	TIRAP	3.16687	C2orf73	3.20434	NNMT	2.68209
1119	ZFAND3	2.36407	ARRB2	3.45581	PART1	2.67916	KATNAL1	3.16627	SMAD1	3.20345	CDC7	2.68097
1120	IQSEC2	2.36296	RPS2	3.45558	FBXO2	2.67837	GDF10	3.16564	UBE2E2	3.20097	ARL1	2.68077
1121	JARID2-AS1	2.36203	ICE1	3.45475	CACNG3	2.67704	TRIM49	3.16546	MYOM1	3.19634	KCTD2	2.67952
1122	C2orf70	2.36151	MCUB	3.4545	GRIA4	2.6768	CRELD1	3.16337	TRPV2	3.19581	VPS16	2.67814
1123	UQCR11	2.36089	MRPS33	3.45379	RGMB	2.676	KITLG	3.16158	PNMT	3.19567	CCND3	2.67577
1124	BEGAIN	2.36082	GPD2	3.45228	EPB41L4B	2.67554	EPHX4	3.16085	SPRY1	3.1938	C2CD4C	2.67557
1125	GPRC5C	2.35845	TOM1L1	3.45155	GP9	2.6732	PRR3	3.16043	VAT1	3.19353	OPA1	2.67467
1126	NEIL2	2.35832	TMEM218	3.45113	WDR25	2.67177	TPST2	3.1599	HACD1	3.19325	RAB6B	2.67456
1127	MAD2L2	2.35792	ATP6V0E1	3.44774	LRP12	2.67139	RELB	3.15977	SH3KBP1	3.19279	PA2G4	2.67383
1128	NRIP3	2.35707	TBCD	3.4477	RTL5	2.66862	PRUNE2	3.15812	PCDH8	3.19218	ANKRD50	2.67371
1129	RFX2	2.35675	PLPP3	3.44251	FLCN	2.6685	TMEM117	3.15662	GULP1	3.19143	NCKAP1	2.67009
1130	LAMP5	2.35651	EMX2OS	3.44082	TMEM150C	2.66458	DSN1	3.15527	CSGALNACT1	3.19027	DDX10	2.66988
1131	SNTA1	2.35629	NOL9	3.43926	KHDC1	2.66382	NPAS2	3.15218	BYSL	3.18942	RIMS1	2.66657
1132	TMSB4X	2.35605	ADORA2B	3.4385	DPH2	2.66095	APOL4	3.15049	LINC00319	3.18939	PARP8	2.6654
1133	SELENBP1	2.35438	GSKIP	3.43777	LRFN2	2.66093	YIPF3	3.14855	TMEM107	3.18662	REC8	2.66513
1134	USP3	2.35317	RBM34	3.43591	LRIF1	2.66005	TFIP11	3.14739	IQCA1	3.1851	WDR92	2.66509
1135	FYB1	2.3519	C1orf53	3.43553	MFSD13A	2.65698	ERICH3	3.14714	TEK	3.18175	ARHGAP26	2.66243
1136	PELI1	2.35146	IDNK	3.43489	DZIP3	2.65645	ZNF648	3.14576	VKORC1L1	3.17867	TK1	2.6617
1137	GAREM2	2.34972	SLC15A3	3.43427	LINC00900	2.65634	KLK5	3.14555	SIRPA	3.17751	GXYLT1	2.66115
1138	CTNNA2	2.34825	ENY2	3.43343	TANC2	2.65546	ANKRD2	3.14102	ZNF710-AS1	3.17678	FBXO27	2.66065
1139	MTHFD1L	2.34787	USE1	3.43251	DPY19L1	2.65526	MFGE8	3.13974	LINC00484	3.17598	YWHAB	2.6597
1140	NMI	2.34556	CHRM4	3.43203	PCDH1	2.65409	ADGRB3	3.13941	FHOD3	3.17232	SYT4	2.65869
1141	APC	2.34533	DNAH5	3.42704	FRRS1L	2.65355	FBXO28	3.13784	C5	3.16965	MAN1B1	2.6573
1142	CCDC28A	2.34501	ARHGEF26	3.42495	YTHDF2	2.65316	LOC105372480	3.13623	DACT3	3.16799	LRSAM1	2.65647
1143	UNC93B1	2.34446	SSTR1	3.42273	C1orf74	2.65285	ARMCX2	3.13575	CALB2	3.1678	SPPL3	2.65582
1144	ENOX2	2.34403	ANOS1	3.42241	PSMG3	2.65139	EMC4	3.13422	SLCO1C1	3.16734	COLQ	2.65449
1145	NCAM1	2.34369	SBDS	3.41887	CBLN1	2.65124	SNX3	3.13422	NPY	3.16645	UBE3D	2.6523
1146	ROM1	2.3435	HTR7P1	3.41738	CD53	2.65057	FBXO34	3.13229	PON3	3.16206	FAM81A	2.65157
1147	TMEM242	2.3424	PSMA5	3.41703	NPDC1	2.64946	LOC100128239	3.13221	RRP7BP	3.15994	NFKBIE	2.65142
1148	GLOD4	2.34051	MIF-AS1	3.41702	SRGAP3	2.64733	TNFSF13B	3.13055	NETO1	3.15989	NUDT14	2.64613
1149	PPP1R37	2.33964	WDR66	3.41608	MGRN1	2.6449	ARID5A	3.13002	TPI1P2	3.15803	CACNA1D	2.64588
1150	C17orf51	2.33943	RAB32	3.41459	RTL8A	2.64291	FBXW7	3.12853	CCDC103	3.15761	EPHA10	2.64453
1151	ARFGEF3	2.33903	B3GNT5	3.41375	RUNDC3A	2.64267	AOC2	3.12634	CHST15	3.15583	PLEKHA1	2.64419
1152	SSBP4	2.33855	HLA-DOA	3.4134	ARHGEF28	2.64159	AKR1A1	3.12608	DDRGK1	3.15416	DECR2	2.64405
1153	HRAS	2.33791	INTS4	3.41164	LOC729930	2.64045	NAPB	3.12597	CDYL2	3.15105	GPM6A	2.6437
1154	SLC25A20	2.33777	TRIP6	3.40963	STIM1	2.64011	TGFBRAP1	3.12462	KCMF1	3.15087	PTPN11	2.64288
1155	APBA1	2.33675	DHRSX	3.40958	GRM5	2.6383	ST8SIA3	3.12314	TRABD2A	3.15045	CYP46A1	2.64121
1156	NALT1	2.33391	CCT5	3.40741	PIN1	2.63584	CKAP4	3.12306	PI4KA	3.14831	KATNB1	2.6412
1157	ADGRL3	2.33199	HLA-DRB4	3.40556	FAM102B	2.63544	BAG5	3.12255	DIRAS3	3.14691	PRAF2	2.64099
1158	LRRC57	2.33183	ADCYAP1R1	3.40379	COPS7A	2.63488	HSD11B1L	3.12113	RAB10	3.14666	DCBLD1	2.64093
1159	DSEL	2.33161	RIOX2	3.4005	NECTIN1	2.63415	AP1B1	3.12089	RUBCN	3.14422	PTER	2.6393
1160	CASP1	2.33087	WDR77	3.40006	TP53BP1	2.63411	SLC35F1	3.12019	IQCJ	3.14282	BATF3	2.63793
1161	C1QC	2.33015	CAP1	3.39801	SFTPD	2.63225	SMARCAL1	3.11914	OR14I1	3.14261	NIT1	2.63755
1162	TTC9B	2.32923	MRPS25	3.39714	CTSB	2.63216	NTRK2	3.11902	ACKR3	3.1418	SORCS1	2.63676
1163	PSIP1	2.32898	FPR1	3.39654	PWP1	2.63135	KCTD8	3.11694	NPDC1	3.13975	ANAPC1	2.63625
1164	NR4A2	2.32881	LYN	3.39602	DNAJA2	2.62914	TPM3	3.11606	YWHAZ	3.1378	EPHA5	2.63576
1165	DUS4L	2.32693	JPT1	3.39346	CSGALNACT1	2.62752	C1R	3.11351	FNDC11	3.13484	ATG5	2.63418
1166	RSPO3	2.32601	DBI	3.39164	TMEM241	2.62688	DUSP14	3.11318	LYN	3.13466	SHANK2	2.63367
1167	IGSF9	2.32529	DNAH12	3.39121	CDK20	2.62314	THAP7	3.11288	TSPOAP1	3.13376	PNPLA7	2.63293
1168	IDH1	2.32492	LMO1	3.3907	CRMP1	2.62258	ME3	3.11128	CD24	3.13371	EME1	2.63248
1169	CLPS	2.32451	LOC93622	3.38996	KLK7	2.62227	AP4B1	3.11056	DCTPP1	3.13311	SSRP1	2.63191
1170	PHKA1	2.32423	STRADB	3.38982	SH3KBP1	2.62183	KLHL42	3.10943	ZDHHC7	3.133	TPX2	2.63128
1171	ANXA2P1	2.32393	MYCNOS	3.38671	MAP3K12	2.62071	DLD	3.10895	ARPC3	3.13272	FIGNL2	2.63058
1172	GHR	2.32268	SEMA3D	3.38414	NTMT1	2.61898	BAD	3.10646	FAH	3.13204	CDKN2D	2.63056
1173	RNF212	2.32212	LINC00937	3.38129	NUDCD3	2.61889	UBE3A	3.10508	NPTX2	3.1297	GDA	2.62902
1174	FTCDNL1	2.32187	SYCE3	3.37994	IFIT1	2.6171	HYAL3	3.10491	MPP6	3.12946	RCN2	2.62888
1175	PDSS2	2.32082	GPNMB	3.37984	G6PD	2.61571	MTRF1L	3.10301	TRIM36	3.12862	SLC25A22	2.6263
1176	ANKRD20A11P	2.31907	RPL21	3.37963	C16orf70	2.6156	SURF2	3.10126	NCKAP1	3.12586	KRT86	2.62469
1177	AARS2	2.31856	LOC103344931	3.37801	SMAD3	2.61552	DECR2	3.10118	RAB8B	3.12518	GON4L	2.6237
1178	DDR2	2.31855	OLFML3	3.37776	DYRK2	2.61499	NRXN1	3.09836	THTPA	3.12341	LIMCH1	2.62367
1179	CXorf38	2.3184	ABCA1	3.37492	TBC1D24	2.61255	KLHDC2	3.09575	FAM86C1	3.12138	ATP8A2	2.62282
1180	ADI1	2.3184	UBXN8	3.37334	NOV	2.6123	PHF20L1	3.0951	PACS1	3.12097	CRMP1	2.62261
1181	AKAP5	2.31811	SYF2	3.37243	SVEP1	2.61203	FBXW11	3.09486	2009-09-01	3.12087	AKAP13	2.62253
1182	NECAB2	2.31738	UFM1	3.37123	EIF6	2.6117	EFNB2	3.09362	ASL	3.11872	JAG1	2.62237
1183	F3	2.31724	FCGR2A	3.36994	CDK5R1	2.61164	CYHR1	3.08868	ADAR	3.11819	ANKRD34A	2.61977
1184	ASTN1	2.31704	UPRT	3.36871	GFOD1	2.60985	RASGRP2	3.08825	ASXL3	3.11761	GSR	2.61828
1185	SORBS2	2.31646	CBR3	3.36767	APOL4	2.60933	MCRIP1	3.08796	SRI	3.1164	HMGCLL1	2.61777
1186	FCGRT	2.3148	CFAP44	3.3672	TTF1	2.6089	NUAK1	3.08795	GTF3C6	3.11632	XKR9	2.61744
1187	TNRC18	2.3141	THBS1	3.36694	PSEN2	2.60797	CCDC34	3.08548	IL17D	3.11629	KCNT2	2.61616
1188	ECEL1	2.31396	GALM	3.36088	NUAK1	2.60785	PMPCA	3.07835	NHSL1	3.11602	CNTN1	2.61532
1189	MAPK8IP1	2.31297	NPHS1	3.3585	KBTBD11	2.60777	GSG1L	3.07658	TG	3.11592	TCERG1L	2.61093
1190	ADD3	2.31264	PPM1M	3.35742	FAM117B	2.60756	MON1A	3.07322	GDF10	3.11386	ATP23	2.6095
1191	SINHCAF	2.31184	JARID2-AS1	3.35726	MAPK14	2.60735	NNMT	3.07225	PHPT1	3.11354	LINC01963	2.60918
1192	TSACC	2.3117	HEY2	3.35656	NLN	2.60681	FBXL2	3.0715	SDK2	3.11339	USP35	2.60766
1193	TUBB	2.31108	RND3	3.35635	CAPN12	2.6065	SLC1A6	3.07112	NT5DC2	3.11243	AUNIP	2.60747
1194	IQCJ	2.31093	TUBB6	3.35625	GSK3B	2.60575	RNF40	3.07112	DHRS9	3.11087	SENP2	2.60698
1195	STK10	2.31038	SBF1	3.35466	PUS1	2.59803	TBL3	3.06862	DSTN	3.10918	LMAN2L	2.60338
1196	GPR27	2.30985	RAVER2	3.35459	DCTN2	2.59802	APMAP	3.06814	FIG4	3.10637	SRSF12	2.60246
1197	ZMYM3	2.30827	ADRB2	3.3534	TSPAN5	2.59647	C1QL2	3.06609	ACAD9	3.10548	PTPN9	2.60234
1198	CMC4	2.30704	SAMD9L	3.35315	ITPKA	2.59559	IL12RB2	3.06583	RIPK2	3.1051	TBC1D32	2.6005
1199	SMIM4	2.3036	AHCY	3.35257	SERP2	2.59374	SLC1A1	3.06347	ABI2	3.10381	PCDHAC2	2.59817
1200	NES	2.3035	PMVK	3.34968	ADCY2	2.59346	GSK3B	3.06311	TMEM196	3.10233	HGSNAT	2.59679
1201	ZNF580	2.30305	SNX2	3.34907	NUDT11	2.59315	SLC39A4	3.06301	LOC645166	3.10208	ZDHHC21	2.59659
1202	SMARCD3	2.30237	RPA2	3.34779	FAM220A	2.59273	DUS2	3.0625	MAPK8IP2	3.10162	GAS2L1	2.59623
1203	DNAJC7	2.30195	HSD17B14	3.34775	MBOAT7	2.59237	ADORA1	3.06236	PDE2A	3.10095	INF2	2.59478
1204	LRRC42	2.3018	ZNF469	3.3468	PXMP4	2.59136	MRPL10	3.06229	SSR4P1	3.09897	RFC3	2.59251
1205	UBXN2B	2.30101	MEIS3	3.3461	TRPC5	2.59113	B4GAT1	3.06215	SORCS2	3.0989	GMPPA	2.59208
1206	PNPLA4	2.29923	PCDH17	3.34585	MIGA1	2.59038	PCDHB9	3.06194	MLNR	3.09814	SYN2	2.59174
1207	HYOU1	2.2991	NKAIN2	3.3454	KLK5	2.58651	UBFD1	3.06157	RAN	3.09717	GRIN1	2.59133
1208	MRPL11	2.29747	CCDC6	3.34487	MPP3	2.58629	GALNT13	3.06133	GPSM1	3.09657	KITLG	2.5901
1209	DFFA	2.29459	RPS8	3.34431	ZNF826P	2.58482	PRKCZ	3.06055	KIAA1147	3.09273	COG5	2.58902
1210	METTL8	2.29352	IL1B	3.3438	PISD	2.58477	NDRG4	3.05963	UBL5	3.09128	CLPB	2.58839
1211	FZD7	2.29344	RUNDC3A	3.33948	PRPF19	2.58418	TOMM5	3.05959	DOLPP1	3.09105	LINC00900	2.58802
1212	KLHL13	2.29257	LOH12CR2	3.33801	TIRAP	2.58331	CBLN1	3.0585	CMTM4	3.08573	ZNF776	2.58782
1213	DMWD	2.29234	TMEM18	3.33772	EHBP1L1	2.58287	MFAP1	3.05708	EHBP1L1	3.08313	CHST15	2.58777
1214	CMKLR1	2.29162	LOC148709	3.33765	TUBB4A	2.58252	CKB	3.05664	TMPRSS5	3.08288	NGEF	2.58705
1215	EIF2AK4	2.29156	PLAC4	3.33748	NCAM2	2.58148	CDT1	3.05407	GRSF1	3.08275	KLHDC3	2.58681
1216	LEPROT	2.29041	LGALS9C	3.33518	CHST10	2.58133	BCL2L2	3.05394	UBE3A	3.08157	LONRF1	2.58636
1217	RASGEF1B	2.28981	AKR1C3	3.33011	SC5D	2.58096	DCTN1	3.05302	KLHL35	3.08139	PPOX	2.58507
1218	LRP1	2.28844	IGSF9	3.3284	HSD11B1L	2.58072	UAP1	3.0521	NUPR1	3.08039	PRMT6	2.58394
1219	C1orf53	2.28787	CHST11	3.32704	ABCB6	2.58065	GRM1	3.05058	TRAPPC6B	3.07973	MIGA1	2.58323
1220	PRPH2	2.28772	TAMM41	3.32547	RNF219	2.5799	ARMCX1	3.05027	GMIP	3.07971	EGR3	2.58048
1221	RMDN3	2.28738	P4HA2	3.32171	SMIM24	2.57823	ASL	3.04956	SLC39A10	3.07869	EFR3B	2.57938
1222	LOC728739	2.28715	SELPLG	3.31944	SH2D3C	2.57808	TCF25	3.04951	PSME1	3.07687	PIN1P1	2.57774
1223	CCR1	2.28616	ASB16	3.31903	ARMC10	2.57775	METTL1	3.04816	FRA10AC1	3.07579	IER5L	2.57721
1224	METTL2B	2.28505	RAB22A	3.31819	AMN1	2.57722	BRCC3	3.04662	NUDT17	3.07551	PITPNB	2.57653
1225	SYNGR4	2.28434	GNG4	3.31713	RAB27B	2.57597	CIDEC	3.04429	SKP1	3.07387	SCN3A	2.5764
1226	TBC1D26	2.28389	BRWD1	3.31626	ATF6	2.57564	RANBP9	3.04287	FAM181A	3.0729	NT5DC3	2.57624
1227	MYRIP	2.28363	NR2F2-AS1	3.31538	TBL3	2.57419	WDR46	3.0419	NWD2	3.07195	KCNMB4	2.57543
1228	2004-03-01	2.28353	FRMD3	3.31376	RAB3C	2.57383	ATP6V1G2	3.04176	FAM102B	3.06962	MLXIPL	2.57527
1229	CD74	2.28077	KCNG1	3.31368	CHMP4B	2.57338	OPN3	3.04029	CNOT7	3.06881	SLC22A10	2.5751
1230	AUTS2	2.28017	CPVL	3.31337	SCYL1	2.57112	PIGQ	3.03766	PKP3	3.06817	NOXA1	2.57427
1231	HACD4	2.27638	LAMA1	3.31314	COMMD7	2.56937	USP19	3.03646	LINGO1	3.06662	DGKA	2.57411
1232	ACTG1	2.27603	DYNLT1	3.31153	RIC3	2.56904	FBXL14	3.03639	PHF20L1	3.06631	PCYOX1L	2.57161
1233	USP14	2.27581	POMP	3.31152	SIPA1L1	2.56845	GEMIN2	3.03596	HCG23	3.06569	HCCS	2.57028
1234	MTOR	2.2744	MSRB2	3.31114	CHST1	2.56658	DEPDC5	3.03527	LINC02217	3.0642	LRRC41	2.57023
1235	PKMYT1	2.2684	ADH5	3.31073	YIPF3	2.56557	BOP1	3.03512	RRAGC	3.06268	CHST10	2.56973
1236	GMFG	2.26833	MS4A7	3.31017	ACTN1	2.56479	PPP6C	3.03492	CBFA2T3	3.06159	GPR6	2.56914
1237	TMEM94	2.26789	S100A2	3.30825	DAGLA	2.56377	TMEM196	3.03442	AGAP3	3.06145	TUBGCP4	2.56701
1238	PKIA	2.26701	DMWD	3.30705	CDC27	2.56181	G6PD	3.03373	DZIP3	3.06135	NYAP2	2.5668
1239	ULBP2	2.26624	GRIK5	3.30682	ABCC6	2.55963	PGK1	3.03356	SCIN	3.0612	PPP2R5E	2.56622
1240	JAK3	2.26597	ARHGEF28	3.30429	ADGRB3	2.55907	SLC25A24	3.0315	CAPG	3.06052	EPHX4	2.56425
1241	ADHFE1	2.26492	ZFP64	3.30334	SERPINI2	2.55898	NOSIP	3.03023	NIP7	3.05989	SUPT7L	2.56235
1242	ZMIZ2	2.26339	PNCK	3.30278	LINGO3	2.55874	NDUFB8	3.02938	PANX1	3.05535	RIC3	2.56004
1243	MINK1	2.26226	RPAIN	3.3026	DCAF6	2.55791	TBPL1	3.02707	POLR2G	3.0532	FAM98B	2.55719
1244	HDLBP	2.26216	DUSP9	3.302	HEATR5B	2.5576	PRSS2	3.02571	MEGF9	3.0523	JPT1	2.55685
1245	BEST4	2.26198	PABPC3	3.30162	RNF187	2.55645	RTN4R	3.02536	KLK5	3.05172	CACNA2D1	2.55675
1246	GEMIN8	2.2617	MAD2L2	3.30136	GABRE	2.55566	ERICH1	3.02074	GLO1	3.0517	ZNF628	2.55422
1247	SYCE3	2.26108	PSMD4	3.30132	SLC4A1AP	2.5556	RNF11	3.02005	ISOC1	3.04885	KLF6	2.55238
1248	MYB	2.26086	ITGA5	3.29998	PRDM12	2.55511	RUFY2	3.01917	MED16	3.04837	MADD	2.55172
1249	PRRG3	2.25978	KCTD10	3.29934	SHC2	2.55494	LRRTM3	3.01896	DUSP3	3.04798	EMC1	2.55117
1250	INTS12	2.25952	ZMAT2	3.29918	POPDC3	2.55291	NUP85	3.01835	PPM1K	3.04745	DHCR24	2.54986
1251	TEK	2.25587	DPYSL3	3.29891	KCNQ5	2.55044	NECTIN3	3.0161	ATP6V0CP3	3.04441	GS1-124K5.11	2.54955
1252	PTRHD1	2.25497	FGL2	3.29834	GPM6A	2.54998	LINC01750	3.01598	2003-09-01	3.04253	FAM19A5	2.54823
1253	EIF4EBP2	2.25472	ACY3	3.29691	SLC8A2	2.5496	CHN1	3.0155	PAXBP1-AS1	3.04118	HMGCS1	2.54741
1254	ATPAF1	2.25357	PACRG	3.29599	HSF2	2.54869	FAM117B	3.01438	RSPO4	3.03996	C8orf46	2.54734
1255	SERPINA1	2.25317	ATF5	3.2949	EXOSC4	2.54783	TRAPPC9	3.01408	DLEU7	3.03969	TTBK1	2.54014
1256	CNOT7	2.25303	MYL6B	3.2948	DNAJC7	2.5478	ORC6	3.01318	SOX11	3.0372	ZC3H12B	2.53788
1257	DPYD	2.25228	ZNF93	3.29166	NCBP2-AS2	2.54628	P2RY6	3.01246	MSMO1	3.03652	MYBPC1	2.53762
1258	SYT17	2.25186	FAM184A	3.28981	KLK10	2.54535	NOVA1	3.0113	KRT83	3.03644	2001-03-01	2.53762
1259	ERH	2.2508	IPO5P1	3.28864	TMEM183A	2.54353	DGKA	3.00965	RPS10	3.0359	VPS13A	2.53735
1260	ARL6IP6	2.24905	C1orf226	3.2876	TCF25	2.54343	NOP56	3.00955	RBM8A	3.03511	TMEM54	2.53406
1261	HPGD	2.24844	SEMA6B	3.28753	WNT7A	2.54217	SPR	3.00903	YWHAG	3.03492	STEAP2	2.52964
1262	PSMA5	2.24803	RPS3A	3.28733	LCE3C	2.54086	MAPK8IP2	3.00858	BHMT2	3.03357	PDE2A	2.52939
1263	CCIN	2.24768	POLR2J	3.28699	SHISA9	2.54074	NIPSNAP3B	3.00677	AP5S1	3.0335	MPP6	2.52906
1264	WDR1	2.24738	BMP7	3.28264	ARHGDIG	2.53944	ADGRB2	3.00657	STMN3	3.0326	RAB35	2.52891
1265	TAAR8	2.24728	SMOX	3.28121	GALNT17	2.53667	GRIK3	3.00609	PPP1R12A	3.03199	NAPEPLD	2.52881
1266	NPM3	2.24655	CDKN1A	3.28109	CSMD3	2.53542	SNX14	3.00578	TRAPPC2	3.03098	JAKMIP1	2.52837
1267	EFEMP2	2.24654	PMP2	3.2803	EPHX4	2.53538	FBXW9	3.0052	SLC2A10	3.02906	FAM84A	2.52762
1268	FAM118B	2.24549	LHX8	3.27962	VPS26B	2.53531	TUBB2A	3.00517	CFL1P1	3.02882	LHPP	2.52744
1269	GTPBP3	2.2452	NOP10	3.27553	RASGRP2	2.53467	PTER	3.00504	GJA1	3.02538	ENOX1	2.52698
1270	CHAD	2.24292	COL5A3	3.27499	ABI2	2.53455	SRPRA	3.00456	TUBB3	3.02483	PTPN3	2.52664
1271	USP22	2.24246	CYTOR	3.27485	STK32C	2.53347	TUBGCP2	3.00445	SLC1A2	3.0241	MARK4	2.52656
1272	C8orf34	2.24216	TEK	3.2747	SMARCAL1	2.53344	CYP1B1-AS1	3.00218	LOC101928111	3.02174	FXYD7	2.52631
1273	ADCY5	2.24105	COA3	3.27463	PTPRM	2.53138	FBLN5	2.99991	LY86-AS1	3.02123	SMC6	2.52575
1274	ATP5MG	2.24096	GPR137B	3.27382	RPRD1A	2.52886	DHPS	2.9944	VANGL2	3.02096	JCAD	2.52414
1275	COX6A1	2.24091	HEPN1	3.27072	PNMA2	2.52873	CTSD	2.99407	HECTD4	3.02028	TPI1	2.52399
1276	C12orf73	2.23827	PLEKHO2	3.27054	RETREG1	2.52842	MAGED1	2.99234	GDPD2	3.01948	RMDN2	2.52366
1277	TBL1Y	2.23649	OSTCP1	3.26975	SLC27A3	2.52794	TBC1D25	2.99121	LOC441204	3.01894	USP39	2.5223
1278	C2CD6	2.23518	RFNG	3.26949	ZNF721	2.52694	PPP3R1	2.98993	USP39	3.01856	SIRPB1	2.52088
1279	EXOSC7	2.23454	SCN7A	3.26601	TMEM160	2.52588	DKFZP586I1420	2.98963	TTLL1	3.01855	TUBA3C	2.52058
1280	LINC00950	2.23448	COG1	3.26558	CYP26B1	2.52504	PGAM5	2.98927	GOLT1A	3.0176	HTR4	2.52021
1281	TSPOAP1	2.23351	NR2F2	3.26196	CKAP4	2.52323	HIKESHI	2.98895	PRPH2	3.01757	ZBTB17	2.52014
1282	C11orf97	2.23347	PON2	3.26107	TANGO6	2.52277	ZMAT5	2.98664	TMEM238	3.01753	DNAH5	2.51967
1283	SEC22B	2.23274	SHISA4	3.26018	SLC7A4	2.52254	GNAQ	2.98606	MLLT11	3.01366	RTL8A	2.51839
1284	CASTOR1	2.23233	RAB18	3.26016	NCOA7	2.52118	NAE1	2.98542	PIM2	3.01183	KCTD1	2.51528
1285	CD99	2.23147	PSMD10	3.25716	ELAVL2	2.5201	NAP1L2	2.98541	SPACA9	3.01104	PDK1	2.51489
1286	FDXR	2.23026	URB1-AS1	3.25649	SPATC1L	2.51834	SBNO1	2.98473	MGMT	3.01013	B3GNTL1	2.51482
1287	MAGEA6	2.2278	EIF4G1	3.25584	SOWAHB	2.51772	ARHGAP25	2.98411	SPRYD7	3.01002	LY6H	2.51445
1288	PDE5A	2.227	B9D1	3.25518	CENPS	2.51745	LINC00672	2.98272	PPP2R5A	3.00813	SBNO1	2.51428
1289	FAM86FP	2.2259	MAPRE1	3.25467	CNTNAP2	2.51701	ARMCX3	2.98226	GATB	3.00715	NLN	2.51298
1290	ITGAX	2.22577	BEGAIN	3.25465	CRELD1	2.51622	UBXN10	2.98064	ARHGAP6	3.00483	UBC	2.51165
1291	SSB	2.22517	LOC101927318	3.25437	PCDHB9	2.51571	VDAC3	2.98015	SMPD1	3.00445	EPS15	2.51161
1292	BCRP2	2.22439	SCAMP1-AS1	3.25405	CGREF1	2.51562	IFT57	2.97907	TRIM22	3.00159	PEX14	2.51154
1293	P2RY1	2.22392	MAGED1	3.25133	B9D2	2.51555	SLF1	2.97881	UROS	3.00139	TECPR2	2.51106
1294	MFSD1	2.2218	GPR34	3.25052	SLC22A10	2.51549	CRLF3	2.97878	MGRN1	3.00014	SKAP2	2.51096
1295	APAF1	2.21958	LRRC56	3.24971	P2RY6	2.51539	NTN4	2.97814	FAM210A	2.9972	GOPC	2.50966
1296	VASP	2.21953	PTPRC	3.24944	STK24	2.5148	DRD1	2.97809	DCUN1D5	2.99645	GLCE	2.50848
1297	P4HA1	2.21901	WIZ	3.2491	ISLR2	2.51448	ALPL	2.97759	COPRS	2.99637	GGH	2.50815
1298	ANOS1	2.21843	C2orf80	3.24682	SGPP1	2.51425	ABCB6	2.97749	FERMT2	2.99544	PRRT2	2.50732
1299	LRRC75A-AS1	2.21764	DNAAF4	3.24492	FIGNL2	2.51281	TWF2	2.97684	RAPH1	2.99422	LRRC20	2.50371
1300	ANKDD1A	2.21764	ECI2	3.24367	SPRYD7	2.51181	GGCT	2.97537	C2CD2L	2.99392	NOVA2	2.5027
1301	ANKRD11	2.21663	ARMCX1	3.24275	KRAS	2.51139	TTLL12	2.97261	PLAC9P1	2.99318	CLCN6	2.50188
1302	CMTR2	2.21533	IPP	3.24078	CREB3L3	2.51091	GABRE	2.97219	AP1M1	2.99028	NAT14	2.50152
1303	FABP7	2.21501	NT5C3A	3.23988	LRRC41	2.51064	SMPX	2.97211	SERINC3	2.98942	SIPA1L1	2.50105
1304	METTL5	2.21387	LEF1-AS1	3.23854	SCG3	2.51061	RUNDC3A	2.97095	CMTM7	2.98918	C8orf33	2.50052
1305	PAX8-AS1	2.21316	S100A11	3.23788	NDRG4	2.5105	TOX	2.97022	WNT7B	2.98815	MYO7A	2.50017
1306	C14orf132	2.21259	KCNN3	3.23757	GGCX	2.5096	NDUFB2	2.96987	FDPSP2	2.98663	TEDC1	2.5
1307	DTWD1	2.21214	DYRK3	3.23695	ARHGEF3	2.50894	NTNG2	2.96916	2008-03-01	2.98464	ZNF777	2.49878
1308	DCAF5	2.21109	NTSR1	3.23525	DENR	2.50808	BRWD1	2.96766	EMC7	2.98422	KHK	2.4973
1309	ZCRB1	2.20982	STK17A	3.23478	PDE4C	2.50757	C19orf12	2.96652	RIC8A	2.9834	MTCH1	2.49623
1310	RNF135	2.2092	GAP43	3.2339	TM7SF2	2.50746	MOAP1	2.96569	RNF182	2.98287	GFOD1	2.49572
1311	KCNIP1	2.20864	APOC1	3.23337	ACKR1	2.5054	IKBKG	2.96514	CAMKV	2.98188	RARA	2.49566
1312	ASRGL1	2.20789	RRAGD	3.2333	UQCRFS1	2.50538	FKBP1A	2.96503	SFRP1	2.9814	MRPL10	2.49552
1313	MRPS33	2.20741	MAPKAPK5-AS1	3.23197	NAP1L2	2.50462	GFER	2.96427	CCNA1	2.98043	PHKG2	2.49378
1314	TSPAN12	2.20705	LAT2	3.23128	DUSP28	2.50458	EXO5	2.96052	PLAC9	2.98024	NBAS	2.49277
1315	LHFPL2	2.20665	SUMO2	3.23109	SYNPR	2.50088	PNPLA6	2.95941	FTH1	2.97891	CLK4	2.4911
1316	SLC25A23	2.2064	PKN1	3.23086	HYAL3	2.50078	CDH13	2.95938	SELENBP1	2.9784	FBXW9	2.49095
1317	MTCH2	2.20441	2003-09-01	3.2302	TRAPPC9	2.50056	TSPAN7	2.9556	FBXO2	2.97832	CDIP1	2.49074
1318	ATP5MC1	2.2033	CCL19	3.22965	PHF20L1	2.49973	PTGES2	2.95532	LOC101930085	2.97475	C2orf73	2.49067
1319	ACOT2	2.20329	ONECUT1	3.22907	CTXN1	2.49713	MCTP1	2.95522	HSPB3	2.97471	RASGRP1	2.48965
1320	MAF	2.20149	PNO1	3.22755	PTPN3	2.49494	SLC20A1	2.95503	COL5A3	2.97119	ZNF25	2.48944
1321	CNN3	2.20145	PUSL1	3.22558	METTL9	2.4937	BMPER	2.95254	MT1F	2.96972	OSBPL8	2.48921
1322	EPS8	2.20083	POR	3.22522	ENPP5	2.4929	LRRC75A	2.95173	UFC1	2.96879	MESP1	2.48918
1323	SLC4A7	2.2007	MINCR	3.22097	HLF	2.49287	STOML1	2.95023	BCLAF3	2.96853	ELOVL6	2.48905
1324	HTATSF1	2.20006	METTL7A	3.21912	THRAP3	2.49169	PPOX	2.94934	CALM1	2.96547	BEGAIN	2.48898
1325	TMEM238	2.19996	ERFE	3.21821	FBLN5	2.49088	RPRD1B	2.94921	ITM2B	2.96359	VCP	2.48757
1326	CTBP1-AS2	2.1994	DNAJC19	3.21805	IQCH	2.49041	MRPL33	2.94709	HMGCR	2.96331	GTF3C1	2.48641
1327	TMEM106C	2.19909	SNRPG	3.21269	CPNE5	2.48951	C16orf58	2.9465	BLOC1S2	2.96184	ZNF541	2.48363
1328	PPIH	2.199	RNF157-AS1	3.21154	NUDT14	2.48932	ANKRD27	2.94595	OAZ2	2.95703	TMEM160	2.48322
1329	LINC00643	2.19835	RNF5	3.21097	MTA3	2.48928	LOC341056	2.94593	OST4	2.95528	ANKS1B	2.48298
1330	RPLP0	2.19774	FKBP14	3.20783	CRYM	2.48924	FBXO40	2.94574	PTRH1	2.95479	UBE2D4	2.48151
1331	NUP37	2.19769	UFD1	3.20622	ZFP1	2.48851	TGFBR3L	2.94347	SLC4A3	2.95455	CMTM8	2.48094
1332	SLC5A12	2.19735	CGREF1	3.20602	FBXW11	2.48799	PPEF1	2.94231	PDHB	2.95364	FABP3	2.47993
1333	CD19	2.19528	POLR2G	3.20514	KCNH1	2.48592	FXYD6	2.94194	FIP1L1	2.95216	TIRAP	2.47921
1334	PSMD2	2.19514	RYR1	3.20337	OTUB2	2.48486	TM7SF2	2.94107	MT2A	2.95174	PDE1C	2.47837
1335	AGFG2	2.19444	ALDH7A1	3.20305	NIP7	2.48399	C2CD4C	2.93846	ADIRF	2.95024	FZD3	2.47811
1336	C15orf59	2.19382	GPAM	3.20255	C1R	2.48393	ADPRHL1	2.93824	DNALI1	2.94922	PTCHD1	2.47769
1337	FAM200B	2.19372	CPNE3	3.19986	MAPK8	2.4838	SNX16	2.93749	CCNYL1	2.94918	PSMC1	2.47711
1338	LHX2	2.19234	BTNL9	3.19895	RABIF	2.48377	PPFIBP1	2.93719	PSMC1	2.94822	RND1	2.47621
1339	SNAPC3	2.19221	SUB1	3.19786	RAD1	2.48281	VPS33B	2.93717	CLEC4G	2.94808	E2F6	2.47612
1340	AAED1	2.19085	EIF3M	3.19695	MRPL10	2.48224	IDH3B	2.93559	YEATS2	2.94632	CXXC1	2.47541
1341	SNTG2	2.18995	CALM1	3.19663	C1orf52	2.48218	EPS15	2.93265	FAM241B	2.94624	HSPA12B	2.47493
1342	TNIK	2.18979	TRIM8	3.19611	LY6H	2.4818	SRP68	2.93258	BSN	2.94602	ATP2B4	2.47483
1343	DNASE2	2.18929	RPL18A	3.19466	STRIP1	2.47992	KCNIP4	2.92951	SAMD15	2.94532	NUDCD3	2.47426
1344	EIPR1	2.18868	RHBDD2	3.19027	AGMAT	2.47972	NUDCD3	2.92842	HLA-DOA	2.94468	KIAA0753	2.47381
1345	MEST	2.18866	S100A1	3.19022	FKBP1B	2.47866	GRM3	2.92754	HRASLS	2.94404	KPNA4	2.47352
1346	SSPN	2.18784	SDC3	3.18895	CCDC9	2.47813	GCLM	2.92689	CAMLG	2.94374	GLT1D1	2.47199
1347	PLEKHO2	2.18707	POLR2A	3.18884	CHN1	2.47681	SLC26A4	2.92485	CHMP4A	2.94343	AJAP1	2.47061
1348	SERPINA6	2.18641	PET100	3.18702	NPTN	2.47632	NGB	2.92459	FOXN3-AS1	2.94327	ZNF461	2.47013
1349	UQCC2	2.18591	CENPP	3.18695	ADM5	2.47607	CYP4X1	2.92367	RPAP3	2.94191	SPIRE1	2.46786
1350	ANKRD54	2.18505	OXCT1	3.18141	CAPNS2	2.47549	SNUPN	2.92277	COA6	2.94083	DNAL1	2.46637
1351	SLCO2B1	2.18472	UNC93B1	3.1814	AURKAIP1	2.47314	RPF2	2.92275	ZWINT	2.94008	LARGE1	2.46624
1352	MRPL49	2.18367	NPC2	3.18127	IGSF21	2.47299	OAZ2	2.92213	PPP3CB	2.93569	PRNP	2.46517
1353	TK2	2.18311	CEP170B	3.18108	KLHL22	2.47059	CELF4	2.92184	PRDX4	2.93349	HYAL3	2.46503
1354	RAPGEF4	2.18248	AZIN1	3.17994	ABHD16A	2.47039	DCAF6	2.92102	YJEFN3	2.93239	ABHD2	2.46482
1355	HADH	2.18068	MAFG	3.17763	GMPPB	2.47039	CTU2	2.91774	STAU1	2.93208	STXBP5L	2.46199
1356	TRA2B	2.18034	ATP6V1C1	3.17678	RTL8C	2.47034	NDFIP2	2.91696	KCNQ2	2.93156	ZNF106	2.46125
1357	ABI3	2.17993	CA5B	3.17656	AZIN1	2.46974	ZNF418	2.91655	ASIC2	2.92945	UNC5A	2.46032
1358	2009-09-01	2.1795	DAP	3.17495	LEFTY1	2.46925	TRPC4AP	2.91573	MPI	2.92929	ZNF84	2.45965
1359	TTLL1	2.17943	SLC1A3	3.17379	RGS12	2.46867	DGAT2	2.91478	GPC6	2.92889	THRAP3	2.45885
1360	MALL	2.17837	TMEFF2	3.17353	OAZ2	2.46823	AMZ2	2.91223	LNPK	2.92648	NIPSNAP3B	2.45816
1361	SSC5D	2.1778	NPTXR	3.1731	LOC728554	2.46818	NPEPPS	2.9114	IFI27L2	2.92502	GLP2R	2.45801
1362	ACAP3	2.17749	SUPT4H1	3.17234	FAM187A	2.4678	TTC5	2.91102	TSPAN18	2.92193	SLC25A10	2.45715
1363	PALM	2.17426	NDOR1	3.17131	LAMP5	2.46744	COA3	2.90763	KCTD21	2.92142	SLC4A10	2.45684
1364	ALMS1P1	2.17372	DOCK8	3.17075	CNTN3	2.46679	GPKOW	2.90641	S100A6	2.92099	ASXL1	2.45618
1365	INHBB	2.17368	RESP18	3.17042	PKIB	2.46666	TTC9	2.90553	ACTA1	2.92009	VPS41	2.45561
1366	SCRIB	2.1732	TAGLN3	3.16999	PINK1	2.46599	RPH3AL	2.90386	MBLAC2	2.91999	CTU2	2.45547
1367	RNASEH1	2.16985	CCDC85C	3.16942	AMPH	2.46555	CBLN4	2.90287	KIAA1191	2.91944	ERICH3	2.45526
1368	VENTX	2.16951	YAF2	3.16935	GPR63	2.46545	PDHB	2.90193	STX4	2.919	DBNDD1	2.45498
1369	TM9SF1	2.16946	TTC1	3.16801	FAM133A	2.46535	AIFM2	2.90066	THRB	2.91839	LINC00672	2.45443
1370	TCF7L1	2.16618	NOTCH2	3.16747	MESP1	2.46423	BAALC	2.90027	ACTC1	2.91815	TMEM184B	2.45434
1371	PIGS	2.16582	CLEC4G	3.16744	SDHAF1	2.46399	PIP4K2B	2.89901	MT1E	2.9179	YTHDF2	2.45413
1372	ZNF517	2.16494	SCD5	3.16723	BCKDK	2.46184	POP4	2.89842	CAPZB	2.91726	USP32P1	2.45396
1373	TOMM34	2.16473	CGNL1	3.16554	PGBD5	2.46162	KCNQ5	2.89819	LSM7	2.91416	SLCO2A1	2.45367
1374	PSME2	2.16305	IL17D	3.16494	WAC	2.46113	RAD23A	2.897	KCNA5	2.9134	CTXN1	2.45284
1375	SLC26A8	2.16287	MRPS23	3.16486	SUSD5	2.4608	MNAT1	2.89567	SERTM1	2.91188	ANXA11	2.45246
1376	PTGER4P2-CDK2AP2P2	2.16161	CXCR4	3.16462	YWHAZ	2.45955	CCDC24	2.89552	STON2	2.91131	POLR3A	2.45116
1377	EMX2OS	2.16126	HMOX1	3.16308	SYN2	2.4588	MAP2K2	2.89491	CD200	2.9112	TGFBRAP1	2.45087
1378	ATP6V0E2	2.16067	HCG23	3.16013	CCL28	2.45623	CRYM	2.8946	TANGO6	2.91054	R3HDM2	2.44987
1379	ARPIN	2.16057	SNX7	3.15917	LINC00319	2.45531	TULP4	2.89222	FAR2P2	2.91008	ANKRD24	2.44964
1380	RAB22A	2.1581	TATDN1	3.15895	KRTAP5-6	2.45452	LDHA	2.89155	CXADR	2.9097	NGB	2.44925
1381	SMIM10L2B	2.1576	CHMP2A	3.15864	SLC22A9	2.45308	INF2	2.88841	ENKUR	2.90853	YPEL2	2.44875
1382	HILS1	2.15559	TNNI3	3.15665	AHRR	2.45186	KRTAP5-6	2.88711	TAC1	2.90326	GTF2E1	2.44856
1383	PSMA3	2.15462	SLC39A12	3.1563	NPTX1	2.45075	KIF3B	2.88549	SH3BP5	2.9017	GPN2	2.44843
1384	CSF1R	2.15456	SCGB3A2	3.15485	CYP2E1	2.45019	TATDN2	2.88396	FBXO41	2.90137	PRPS2	2.44623
1385	CAPN2	2.15235	FAM213B	3.1544	RIMS1	2.45014	APBB3	2.88176	SUPT7L	2.9012	KCNS2	2.44622
1386	SLITRK6	2.15207	TMEM126A	3.15351	ENOX1	2.44989	DIEXF	2.87982	ITFG1	2.9001	POLE3	2.44502
1387	DNAJC24	2.15113	NALT1	3.15211	SPRED1	2.44926	POLR3H	2.87935	IGSF11	2.8999	GATAD2B	2.44337
1388	GNAI2	2.15043	CPNE6	3.14952	EXT1	2.44909	KCNJ8	2.87916	OAZ3	2.89926	VAMP7	2.44301
1389	GABRG1	2.14972	GPR68	3.14901	DHX30	2.4485	JADE2	2.87908	POLR2L	2.89903	GSKIP	2.44265
1390	EPHA5-AS1	2.14931	TK2	3.14625	HDAC9	2.44834	SAMD12	2.87855	DMGDH	2.89683	HSD11B1L	2.44243
1391	LTA	2.14878	PYCARD	3.1462	TUSC3	2.44827	POLR2E	2.87816	PALM	2.89538	CENPF	2.44103
1392	FAM86B3P	2.14766	LILRP2	3.14538	GRK5	2.44772	MAEL	2.87778	RALA	2.89476	C1S	2.44089
1393	CPT1C	2.14445	RGMB	3.14506	DEPDC5	2.4472	WDR74	2.87737	COL11A1	2.89321	MFSD14A	2.44087
1394	MORN5	2.14405	PPM1N	3.14436	FBXO28	2.4457	FAM213A	2.87666	KCNV1	2.89245	LRTM2	2.44086
1395	LMCD1	2.14238	KLF8	3.14376	MDH1	2.44452	GMPPA	2.87637	PGRMC1	2.89169	ALOX15B	2.44012
1396	TEKT2	2.14233	CD68	3.14228	MIR100HG	2.44425	DDX42	2.87561	DHDDS	2.89015	PRAG1	2.43849
1397	C1orf226	2.14142	FDPSP2	3.13862	LRFN3	2.44371	CYP4Z1	2.87433	KCNQ1	2.89001	NOVA1	2.438
1398	ZNF710	2.14048	DHRS4	3.13737	ACOT4	2.44156	PDCD2L	2.87173	VWCE	2.88941	MFSD12	2.43764
1399	TTC8	2.14036	PAFAH1B3	3.13587	TMEM107	2.44114	CCT4	2.87166	TUNAR	2.88809	AP4B1	2.43617
1400	LAT2	2.13969	UBA7	3.13365	GNB5	2.44067	PITPNM2	2.87149	KCTD10	2.8878	LDLR	2.43429
1401	CLEC2D	2.13942	HINT1	3.13315	HTR4	2.44035	SATB2	2.86992	FOLR1	2.88686	LEFTY1	2.43383
1402	PKP2	2.13911	SLIRP	3.13308	TFAP2C	2.43944	AMDHD1	2.86857	RABIF	2.88584	ARF5	2.43351
1403	DLEU1	2.1389	DACH2	3.1328	PCDH20	2.43941	MVD	2.8675	CLU	2.88558	MAST3	2.43279
1404	ZMYND15	2.13801	CCBE1	3.13213	PUS7	2.43822	SRSF12	2.86719	ENTPD6	2.88464	ZNF425	2.43203
1405	ZNF157	2.13721	LOC101927974	3.13187	DLG3	2.43701	ASB2	2.86705	KRT17	2.88383	BTBD9	2.43142
1406	CTSO	2.13668	TUBB8	3.13185	KCNQ3	2.43676	HTR3B	2.86421	CASC10	2.88319	CHRM1	2.42816
1407	FAM107A	2.13549	MT1F	3.13137	NT5DC3	2.4359	C1orf43	2.86331	SLC7A6OS	2.88164	ALOX12B	2.42619
1408	ASIC1	2.13545	PSORS1C1	3.12965	BECN1	2.43563	TMEM44	2.86239	PRKAA2	2.87718	SIN3B	2.42303
1409	DLX4	2.13533	POLR2F	3.12909	ARL14EP	2.43346	PRAF2	2.86194	LDHC	2.87615	RELN	2.42138
1410	MCCC2	2.13373	SENP5	3.12822	PDPK1	2.4332	SRGAP3	2.86074	CALM3	2.87579	NAP1L3	2.42079
1411	GATD1	2.13284	TGFBR3	3.12814	TNNI3	2.4329	TAB3	2.86021	HINT1	2.87565	ATP6V0CP3	2.42048
1412	MYOG	2.13199	MPV17	3.12731	ATCAY	2.43247	LINC00484	2.85895	PITPNB	2.87461	RMND5B	2.42007
1413	MASP1	2.13121	SLC1A4	3.12519	SNX17	2.43232	NEURL4	2.85843	CYP4X1	2.87429	MVD	2.42001
1414	SOX11	2.13056	IDI1	3.12374	SNRPB	2.43124	SH3GL2	2.85833	ASH1L-AS1	2.87387	DRD1	2.41983
1415	RPL13AP6	2.12998	F3	3.12343	SATB2	2.42964	RNF187	2.8583	GAR1	2.87386	FAXC	2.41944
1416	SCOC	2.12977	RPS18	3.12315	DRD1	2.42932	LOC100507557	2.85759	CBFB	2.87287	CPEB1	2.41861
1417	ACADL	2.12972	TSPAN12	3.12256	ASGR2	2.429	DYM	2.85437	ARL8A	2.8706	CRIP2	2.4176
1418	SARDH	2.12936	VSTM2B	3.1223	MYADM	2.42827	VEZT	2.85367	C21orf2	2.86936	PARVB	2.41683
1419	HLA-C	2.12808	HTRA3	3.12175	UQCR10	2.42816	GPR63	2.8526	CNNM4	2.86405	SPRYD3	2.41521
1420	ILF3-AS1	2.12729	OTUD6A	3.12155	MPV17L2	2.42676	ACTR1B	2.85258	PERM1	2.86253	SLC25A52	2.41442
1421	RNF157-AS1	2.12664	CLDND2	3.1203	CBLL1	2.42652	SLC27A3	2.85142	SEC22B	2.86178	KLHL22	2.41414
1422	IFT27	2.12541	LAMTOR1	3.12004	EBP	2.42493	ZFYVE21	2.85138	ADGRF5	2.86138	WDR24	2.41411
1423	CHRNB1	2.12492	CYTL1	3.11737	PGM2L1	2.4243	ZNF721	2.85116	ADM5	2.85674	NIPAL2	2.41344
1424	ASB16	2.12444	CENPM	3.11731	PHKG2	2.42407	CAMKK1	2.85116	KRAS	2.8565	FDX1L	2.41312
1425	BRMS1L	2.12366	RSPO3	3.11543	ARHGAP28	2.42355	GUCY1A2	2.85106	EGLN1	2.8562	RNF40	2.41307
1426	C1orf21	2.12217	GSTO2	3.11526	SFXN3	2.42317	TCEAL5	2.84761	MYH10	2.85404	MAPK8	2.41292
1427	MACF1	2.12191	SF3B2	3.11497	DNAJB14	2.4231	OGT	2.84744	RWDD3	2.85356	UHRF2	2.41231
1428	VPS26B	2.12155	NSA2	3.11433	NOMO1	2.42295	RFX3	2.84566	OVOL2	2.85232	QPCT	2.4118
1429	BLCAP	2.12149	DPY19L3	3.11384	MANEAL	2.42177	ITPKA	2.8422	A1BG-AS1	2.85168	SCPEP1	2.41158
1430	BDKRB2	2.12125	TOM1	3.10767	LINC00672	2.4192	B9D2	2.84172	TTYH1	2.84884	LOC108783654	2.41078
1431	CADM3	2.1202	HIGD1A	3.1076	KHDRBS3	2.41797	PRKAA2	2.84056	TPX2	2.84855	TLDC1	2.41019
1432	SIN3B	2.11989	MRPL11	3.10725	KLHDC2	2.41739	SEMA4F	2.83801	NUDT4	2.84779	EFCAB1	2.40688
1433	FGFBP3	2.11911	NXT2	3.10596	RFPL1	2.41682	GOT2	2.83356	ARF1	2.84693	DCAF4	2.40508
1434	TMEM120A	2.11887	DDN	3.10545	CANX	2.41445	CCT2	2.83317	RPL41	2.84626	MYH10	2.40501
1435	MORN2	2.11861	CTXN1	3.10051	GCNT1	2.41383	NAT14	2.83083	S1PR1	2.84558	RUFY2	2.40376
1436	STX2	2.11586	LINC00982	3.09895	TMEM268	2.41362	MIF-AS1	2.82889	CD6	2.84239	NEDD9	2.40362
1437	CES2	2.11569	RAMP1	3.09878	TOMM34	2.41267	BAIAP2	2.82875	PLIN5	2.84197	LYSMD1	2.40149
1438	HEY2	2.11381	RGS22	3.09814	ANXA6	2.41174	TMIE	2.82769	ATP6V1G2	2.8418	SPDYE5	2.40088
1439	HNRNPUL1	2.11263	PALM	3.0975	TUBB8	2.41067	FRAS1	2.82622	PTDSS1	2.84147	ZNF418	2.39802
1440	RAB31	2.11225	TPRG1L	3.09261	POLR2B	2.40987	MGRN1	2.82548	CLCN6	2.84046	CHMP1A	2.39748
1441	C1QB	2.11173	DCAKD	3.09235	TRAPPC2	2.40965	COP1	2.82507	MYH15	2.83983	ANKRD30BP2	2.39705
1442	EPB41L4B	2.111	ZSWIM7	3.09216	LOC100996385	2.40899	LOC441666	2.82506	SEC24D	2.83767	HTR7P1	2.39669
1443	SUGT1P3	2.11098	COPRS	3.09204	GLP2R	2.4089	LINC01140	2.82285	CALU	2.83728	RNF167	2.39529
1444	GABRA2	2.11081	OTX1	3.09202	GOT2	2.40776	CDC27	2.81682	DHRS4	2.83682	LMF1	2.39468
1445	TMEM61	2.11057	IGFBP5	3.09151	PI4KAP2	2.40685	MPI	2.81585	TTPA	2.83638	SATB1	2.39457
1446	TXN2	2.11044	CD24	3.08989	MAPK4	2.40613	HINFP	2.81575	ASB6	2.83419	LZTS1	2.39327
1447	SPTSSA	2.10994	PRPS1	3.08981	SNX3	2.40528	RHOF	2.8154	SYT5	2.83325	OLA1	2.39276
1448	AHRR	2.10989	NUCB2	3.08808	PLEKHA1	2.40491	CPSF3	2.81442	RAC1	2.8295	BAHD1	2.39161
1449	LOC100129034	2.10847	TRMT112	3.08585	C17orf51	2.40389	TMEM241	2.81271	METTL9	2.82834	NLE1	2.39152
1450	ARHGEF40	2.10825	PLCE1	3.08575	AARS	2.40296	ENOX1	2.81252	MRPL28	2.82655	UBL4A	2.39084
1451	STRN4	2.10722	GBA	3.08537	OLFM1	2.40266	GSK3A	2.81196	SYT9	2.82606	EVL	2.38952
1452	RGS18	2.10715	GNG5	3.08475	MAN1A1	2.40242	NELL2	2.81062	MAFK	2.82255	ACOX3	2.3878
1453	MPHOSPH6	2.10627	RAB11A	3.0846	DSN1	2.40133	FOXJ3	2.81055	PTGES	2.8218	OCRL	2.38654
1454	ANKRD19P	2.1052	TXN2	3.08417	ARF5	2.40083	RHCG	2.80949	RBBP7	2.82146	CAPRIN1	2.38627
1455	TUBA3D	2.10271	MTHFD1L	3.08385	NPHS1	2.40082	RETREG3	2.80693	TBC1D26	2.81835	RNF123	2.38552
1456	PHF21B	2.10269	TSEN34	3.08336	GOLGB1	2.4003	IGFBP6	2.80588	CCDC68	2.818	VCPKMT	2.38266
1457	INTS4	2.10268	CPSF4	3.08296	HSDL1	2.39964	CHEK2P2	2.80502	KCTD17	2.81695	ATOH7	2.38171
1458	COPS4	2.10267	BRK1	3.0797	UBE2S	2.39863	TSFM	2.8044	SMAD3	2.81645	PRKD1	2.38143
1459	FCF1	2.10101	CD58	3.07864	SLC25A22	2.39861	LINGO1	2.80384	CINP	2.81564	ZDHHC7	2.38143
1460	LOC101927811	2.10051	CASP8	3.07861	TIMM29	2.39732	MRPL9	2.80376	CPNE5	2.81405	RNF128	2.37954
1461	NKAIN3	2.09904	POP4	3.07835	TRABD	2.39385	PCDH8	2.80203	TIMP1	2.80924	C1R	2.3794
1462	SPINK2	2.09902	FBXO17	3.07764	DGAT2	2.39047	TSR2	2.8019	RELN	2.80879	TMEM181	2.37748
1463	TMEM164	2.09739	SMAD3	3.07748	SEPHS2	2.38957	CENPS	2.80185	ACAT2	2.80766	TNKS1BP1	2.37613
1464	PRKCG	2.09726	ATP5MC1	3.07677	NAT14	2.3893	OLFM4	2.80002	EXD3	2.80744	NPY1R	2.37538
1465	CDH20	2.09693	ATP1B2	3.0726	SLC6A7	2.38889	CDH8	2.7998	HGH1	2.80321	PRKCD	2.37522
1466	FAM50B	2.09617	DAP3	3.07081	ALS2CL	2.38864	ZNF304	2.79862	PGAP1	2.80207	GABRB1	2.37348
1467	OSTC	2.09598	ASAH1	3.07036	RGL1	2.38864	SLC4A10	2.79771	RAPSN	2.80104	CLEC4G	2.37218
1468	DNAL4	2.09506	DNAL4	3.06861	VDAC1	2.38384	BATF3	2.79754	FAM19A1	2.79966	GAP43	2.3712
1469	TP53I3	2.09457	STX4	3.06781	SNRNP27	2.38369	MALSU1	2.79548	SOCS7	2.79958	GGCT	2.3699
1470	GABRA5	2.09393	CCDC86	3.06753	CCNY	2.38361	ACSF3	2.79548	USP7	2.79736	CABLES2	2.36958
1471	CBX5	2.0911	ALDH4A1	3.06433	RNMT	2.38304	ST6GALNAC5	2.79521	FABP3	2.79504	COL11A1	2.36947
1472	SAMD14	2.09006	PDE5A	3.06322	PQLC1	2.38154	BABAM2	2.79503	CASTOR1	2.79449	C2orf80	2.3692
1473	LAPTM4A	2.08964	PVT1	3.06285	RMDN2	2.3813	DYNC1H1	2.79485	TM7SF2	2.79285	ASB2	2.3689
1474	GIMAP2	2.08842	TRO	3.06128	TSPYL2	2.38034	ELAVL4	2.79197	ATG7	2.79248	LINC01881	2.36747
1475	MMAB	2.08768	SYNJ2BP	3.06113	ATP6V1E1	2.38007	PWP2	2.79141	LRP1B	2.79202	FIGN	2.36536
1476	GPR6	2.08738	SNTG2	3.05766	KLHL42	2.37955	USP5	2.79104	FAM167A	2.79131	GIT1	2.35987
1477	BCKDHB	2.08685	ZNF572	3.0572	NKD2	2.37928	CRAT	2.79041	EMID1	2.79103	C8orf44	2.35947
1478	UPP2	2.08639	LIX1L	3.05686	CBX2	2.37921	PRELID1	2.78994	B3GAT1	2.79053	FAM133A	2.35891
1479	LYRM1	2.08614	COPS9	3.05528	ARID5A	2.37809	ARHGAP28	2.78929	2002-03-01	2.79003	SRSF7	2.35882
1480	ZC3H18	2.08128	ADGRL3	3.05227	SLC25A3	2.37789	TPMT	2.7884	SLC25A26	2.78931	TMEM25	2.35793
1481	TAF1B	2.08104	TG	3.05183	ZFR2	2.37674	ARF3	2.78815	NWD1	2.78825	PPP5C	2.35639
1482	SMPDL3A	2.08047	CHPT1	3.04943	LRRC40	2.37604	PCDH19	2.78805	WLS	2.78784	RNF8	2.35552
1483	ATP9B	2.08041	SNHG8	3.04771	ELOC	2.37413	FAXC	2.78754	FZD2	2.78723	SCAPER	2.35471
1484	TCTEX1D2	2.07877	KCTD15	3.04719	CCNA1	2.37332	MAGEH1	2.78546	ESD	2.78568	SNCA	2.35414
1485	SLC29A4	2.07672	SLIT3	3.04663	NEUROD6	2.37312	GON4L	2.78532	SND1	2.78533	SELENOH	2.35003
1486	NACA	2.07584	CRADD	3.04637	MIR4697HG	2.37281	CCDC51	2.78479	SMIM4	2.78355	PHYHIP	2.34887
1487	SCAF1	2.0754	GGCT	3.04563	RNF8	2.37263	DNM1P35	2.78463	VPS35	2.78303	CRELD1	2.34832
1488	GABBR1	2.07193	SREBF2	3.04543	RELB	2.37219	SRSF7	2.78456	LOC105378853	2.78163	ELAVL1	2.34802
1489	PIFO	2.07119	SLC5A12	3.04528	PIGQ	2.37218	SLC25A46	2.78377	EIF2S1	2.78156	HOMER1	2.34726
1490	ITGA6	2.07102	LINC02550	3.0451	RAB33A	2.37163	CYP51A1	2.78073	SLC44A2	2.78086	GLMN	2.34698
1491	CCDC86	2.07098	HLA-G	3.04498	NNT	2.37156	IKBIP	2.77952	PBXIP1	2.77738	CPD	2.34673
1492	RAMP1	2.07084	HMGCS1	3.04463	RUFY2	2.37124	HBM	2.77663	ISYNA1	2.77727	SNX13	2.34598
1493	P2RX2	2.07062	LRRN2	3.04434	UBE2Q1	2.37087	MRFAP1	2.77633	GNAI2	2.77648	MFGE8	2.34575
1494	FSIP1	2.07048	CHRNB2	3.04387	E2F4	2.37046	GAS8	2.77369	ASTN1	2.77643	CRH	2.34529
1495	FABP5P3	2.07028	TBC1D27P	3.04208	NBEA	2.37022	SLBP	2.772	STIM1	2.77474	SLC25A41	2.34524
1496	CD68	2.06923	ERBB2	3.04138	MTMR12	2.37	PDS5A	2.77117	AKR7A2	2.77458	FAM171A2	2.34444
1497	SLC15A2	2.06918	LIMK2	3.04099	WDR4	2.36998	SVEP1	2.76985	SLC25A46	2.7736	TUBB3	2.34369
1498	TNFSF13	2.06891	GPC2	3.04081	DEPP1	2.36987	RTL10	2.7671	USP12	2.77323	MEIG1	2.34317
1499	POLE4	2.06841	EFCAB1	3.03935	OPN3	2.36629	SPPL3	2.76691	JARID2-AS1	2.77252	LIN7C	2.3426
1500	VSIG10L	2.06777	BTC	3.03934	RNF128	2.36504	NAPEPLD	2.76619	FAM171A2	2.77218	PRR7	2.34016
1501	MAN1A1	2.06587	TOMM5	3.03842	B4GAT1	2.36402	ABHD8	2.7639	C19orf12	2.77189	PER2	2.33927
1502	RASA4CP	2.06581	HACD1	3.038	CTU2	2.36329	OLFM1	2.76378	TENM3	2.77187	C17orf51	2.33904
1503	PEX26	2.06376	SMIM10	3.03776	TMEM150B	2.36313	NIF3L1	2.76351	CAMK1G	2.77142	HPCA	2.33875
1504	ADAMTSL1	2.06245	DACT3	3.03668	SNAI3-AS1	2.36159	PJA1	2.76252	C1orf122	2.77108	SMKR1	2.33848
1505	GPR149	2.06239	SPRED1	3.03603	ZMAT2	2.36127	EIF3K	2.76183	GABRB3	2.76905	LONP2	2.33783
1506	GGACT	2.06187	YWHAEP1	3.03144	DDX54	2.36116	RMDN2	2.76161	SAP130	2.76666	SRD5A3	2.33618
1507	TPD52L2	2.06142	LINC01551	3.03124	POLR3E	2.35938	GALNT11	2.75882	SERPINF1	2.76452	GUCY1B1	2.33612
1508	ANKRD20A5P	2.06106	FGF14-AS2	3.03088	OSBPL10	2.35785	SLC25A26	2.75879	LHX2	2.76292	BTBD1	2.33554
1509	NUDT7	2.06086	ETFRF1	3.0308	CADM2	2.35633	PEX5L	2.75862	TAMM41	2.76273	DCAF6	2.33534
1510	RIMKLB	2.05827	APCDD1	3.03043	CDH10	2.35532	AMN1	2.75834	TAF9	2.76198	HSF2	2.33514
1511	NRXN2	2.05683	RPLP1	3.02903	ATG9A	2.3533	TMEM126A	2.75829	PTPRR	2.76074	KCNC2	2.33459
1512	PTS	2.05621	TSTD1	3.02885	CRH	2.35271	MYCBP2	2.75421	JAZF1	2.76013	EIF1AD	2.33455
1513	LACTB2	2.05619	MRTO4	3.02767	TMEM53	2.35045	AKAP6	2.75259	TIMP2	2.76013	TOM1L1	2.33451
1514	ZNF469	2.05602	COMP	3.02754	GALNT13	2.34872	ZNF780A	2.75182	NUDT2	2.7575	FRMPD4	2.33392
1515	MYOF	2.05598	ATP2B4	3.02716	ZNF304	2.34789	UBE2Z	2.751	PHLPP2	2.75676	RNF145	2.33155
1516	DNAJB13	2.05597	PGM1	3.02713	CNRIP1	2.34742	TRAPPC5	2.75038	PLPPR4	2.75651	ZNF148	2.33023
1517	SLC25A18	2.05522	CBFB	3.02534	COPA	2.34661	ATG9A	2.74904	NRL	2.75629	WDR4	2.32913
1518	APPL2	2.05517	NCAN	3.02527	LDHA	2.34598	THEMIS	2.74826	FN3KRP	2.75582	WISP2	2.32879
1519	DNAJC5	2.05491	MYL3	3.02506	SLC26A4	2.34588	EI24	2.74651	S100A16	2.75533	ZNF350	2.32865
1520	SNRNP27	2.05404	TTYH1	3.02443	TRIM36	2.34466	TMSB10	2.74645	FARP1	2.75387	HDC	2.32784
1521	SCIN	2.05379	RPL7A	3.02383	TDRD9	2.34295	CCM2	2.7463	PSMA6	2.75371	UTP4	2.32774
1522	EBLN3P	2.05342	TONSL	3.02225	BAG4	2.34247	NCAM2	2.74462	MVD	2.75303	MCOLN1	2.32752
1523	SPRED1	2.05329	DNAH9	3.02224	TRIB3	2.34239	CLU	2.74447	TP53BP1	2.75229	SPRY2	2.32584
1524	NDUFAF8	2.05155	RIPK2	3.02222	TUBB8P12	2.34231	OTUB1	2.74423	MYLIP	2.75144	STEAP1B	2.32439
1525	TUSC1	2.05134	ATP5MG	3.02178	GPNMB	2.34189	TMPO	2.74418	PHF13	2.75127	USP32P2	2.3237
1526	VAMP8	2.05067	ARHGAP4	3.02059	POLR2D	2.34157	COMMD10	2.74262	PFKL	2.75097	NCALD	2.32316
1527	OTOF	2.04953	COA6	3.01956	ARL4D	2.34148	CIAPIN1	2.74241	YPEL5	2.7476	PTPN4	2.32291
1528	COL9A1	2.04844	FUCA2	3.01755	TAMM41	2.34101	FAM13A	2.73989	MT1L	2.74695	ENO2	2.32197
1529	NCOR1P1	2.04777	THBS4	3.01614	ARHGEF2	2.34073	TRIM11	2.73841	MEIG1	2.74642	ENPP5	2.32191
1530	PLEKHA2	2.04645	TMC8	3.01485	KATNAL1	2.33975	ATAD3A	2.73692	PAPLN	2.74509	CUL4B	2.32151
1531	PRSS2	2.04608	FUOM	3.01463	PLEKHG5	2.33956	NEXMIF	2.73475	ACSL4	2.74498	SELENON	2.31868
1532	LINC02381	2.04592	E2F5	3.01452	USP21	2.33773	COPRS	2.73291	DUSP18	2.74476	JOSD1	2.31788
1533	GABRA3	2.04568	MOXD1	3.01403	RABAC1	2.33769	KIF16B	2.72885	LOC148709	2.74161	CTNNB1	2.31719
1534	FLVCR1	2.04536	CD81	3.01394	FJX1	2.33742	C17orf58	2.72753	RNF187	2.74149	LINC00622	2.31718
1535	NEBL-AS1	2.04395	ATP8A2	3.01368	MRPS25	2.33705	GRIN1	2.72695	ACOX2	2.74076	MLLT11	2.31575
1536	KIRREL2	2.04383	FGFR3	3.01199	AP2A1	2.3365	SMAD3	2.72688	ERMARD	2.74069	GPR171	2.31473
1537	LOC101927027	2.04382	SIGLEC11	3.01156	LINC00622	2.33631	FEM1C	2.72626	LINC00595	2.73977	UGGT2	2.31446
1538	KCTD6	2.04361	OAZ1	3.00881	TMEM198	2.33605	TUBA1A	2.72623	DHRS2	2.73854	METTL1	2.31388
1539	TXNL4A	2.04316	ACSM5	3.00597	TSR3	2.33585	GPATCH3	2.72585	CERS6	2.7385	ARMCX1	2.31353
1540	MRPL20	2.04316	USP9X	3.00595	POLR3K	2.33487	KLHL29	2.72557	NRAS	2.73728	CELF4	2.31136
1541	TAGLN2	2.0423	HPGDS	3.00592	FBXO40	2.3346	HOPX	2.72539	CLDND2	2.73701	JADE2	2.31078
1542	TSPAN6	2.04205	HHLA3	3.00285	NAXE	2.3346	KLK7	2.72472	XKR4	2.73647	RTKN2	2.30997
1543	C2CD4A	2.0416	EIPR1	3.00261	POLR2H	2.33349	WBP2	2.72352	EFR3B	2.73631	SAPCD2	2.30923
1544	PTPN3	2.04105	SH3BGRL3	3.00182	HSP90B1	2.33249	MTX3	2.72312	XK	2.73624	NDFIP2	2.30738
1545	TMCO3	2.04082	GLOD4	3.00017	RPP40	2.33211	ZMAT2	2.72138	DIO2	2.73602	NCLN	2.30658
1546	CHST9	2.04034	NACA2	2.99603	LMBR1L	2.33163	RASL10A	2.72088	CRIM1	2.73538	PPP2R2A	2.30648
1547	SRI	2.0397	ERLIN2	2.99602	PTRH1	2.33059	NUPL2	2.72035	TMEM173	2.73537	ARHGDIG	2.30034
1548	GOLT1A	2.03927	DIRAS3	2.99541	PRKCD	2.32906	FDPSP2	2.71992	DRAM1	2.73294	2002-03-01	2.30015
1549	CD33	2.03886	WSCD1	2.99496	PPP5D1	2.32863	CAPNS2	2.71938	SCUBE2	2.73266	RTL10	2.29952
1550	PCDHGA12	2.03862	SYNPO	2.99219	C3orf33	2.32788	AURKA	2.7189	PPDPF	2.72951	HS3ST2	2.29946
1551	PRR5	2.0379	DMAC1	2.98965	ULBP2	2.32773	RNF44	2.71847	FAM228B	2.72728	DPP6	2.29898
1552	HLA-DPB1	2.03778	IDH2	2.9893	UGCG	2.32771	DNAJB14	2.71828	WDR26	2.72678	ARMC9	2.29884
1553	LMO2	2.03728	HYKK	2.98803	RTL6	2.32722	MIF	2.71734	KIAA1549	2.72644	LSP1	2.29757
1554	RPS4Y1	2.03643	DAB1	2.98795	VPS13A	2.32717	COA1	2.71717	SNX2	2.72615	CCDC88C	2.29748
1555	RNASEH2A	2.03547	CLPS	2.98753	SNAP25	2.32664	NCAPH2	2.71697	PCLO	2.72536	TRAF3	2.29732
1556	B3GALT5-AS1	2.03529	KLHDC8A	2.98714	ASS1	2.32656	ZBTB44	2.71681	C1orf52	2.72425	TRIM9	2.29684
1557	TBL1X	2.03524	CYSTM1	2.98617	SLF1	2.32621	PSMC2	2.71452	BAD	2.72366	USP24	2.2959
1558	C3orf14	2.03445	BBS4	2.98404	MIF-AS1	2.32485	ADCK2	2.71183	WDFY4	2.72154	MEGF8	2.29566
1559	STMN3	2.03431	CCZ1P-OR7E38P	2.98317	CACNA1B	2.324	MYADM	2.71171	LIX1	2.7176	LGI4	2.29563
1560	LIMA1	2.03407	SLC35G6	2.98271	QPCT	2.32229	GPR22	2.7113	TOX4	2.71719	CCDC106	2.29463
1561	LRRC37B	2.03324	C16orf95	2.98211	GBF1	2.32214	FAM162B	2.71063	SEZ6	2.71606	ARL10	2.29281
1562	AUNIP	2.03273	NINL	2.97838	LINC00506	2.31684	GSS	2.7063	L3MBTL4	2.71604	C3orf33	2.29101
1563	TLR6	2.03269	AP3D1	2.97704	GEMIN6	2.31674	ID2	2.70367	LOC105372480	2.71527	LRFN4	2.29068
1564	DNAJC3	2.03194	STX2	2.97569	STEAP2	2.31588	CLTB	2.70332	PEG10	2.71363	AKAP6	2.2857
1565	RCBTB2	2.03144	ELOB	2.97463	WDR92	2.31475	POLR2B	2.70132	CPT1C	2.71187	PPIAL4G	2.28519
1566	KIF1B	2.03112	HSD11B1L	2.9736	THEMIS	2.31461	FZR1	2.70106	TRMT112	2.71075	GRWD1	2.2851
1567	FKBP14	2.03065	RPS4Y1	2.97349	ATP5MC1	2.312	UHRF2	2.70052	ALDH6A1	2.70857	GSPT2	2.28163
1568	RPS6KA4	2.03025	FBXO41	2.97347	NDUFV1	2.31123	SPACA9	2.69857	SAMD14	2.70567	FAM199X	2.2816
1569	METRNL	2.03017	NOL4L	2.97239	ELAVL4	2.31115	MRPS18C	2.69808	IDI1	2.70548	KCNA4	2.28017
1570	ERBB2	2.02967	CSF1R	2.97197	NMT1	2.3103	ARHGEF2	2.69717	PLTP	2.70527	SYNRG	2.27611
1571	SLC16A5	2.02943	ARHGDIB	2.97146	FAM163B	2.30865	KRT83	2.69699	GPT2	2.70435	GNG13	2.27399
1572	FBXW2	2.02905	IGSF22	2.96957	C7	2.30856	PDCD6	2.69633	WASHC3	2.70422	LNX1	2.27359
1573	UBL5	2.02785	RAB29	2.96923	NARF	2.30676	PDZRN4	2.69524	CCDC110	2.70406	ZNF469	2.27297
1574	RBL1	2.02773	AMZ2P1	2.96908	PRRT2	2.30587	ZDHHC21	2.69375	DHCR7	2.70399	NPPA	2.27288
1575	RWDD3	2.02755	RPL35	2.96875	SBNO1	2.30506	ZDHHC23	2.69278	BRF2	2.70397	LANCL2	2.27274
1576	ETF1	2.0272	EFNB3	2.96856	FEM1C	2.3026	GDAP1L1	2.69173	CCDC112	2.70382	PCDH20	2.27262
1577	AMPD2	2.02718	KIAA0100	2.96824	EFCAB1	2.29881	NPDC1	2.6894	RCN1	2.70315	WDR86	2.27083
1578	COMMD6	2.02597	LHX2	2.96762	USP9X	2.29862	NSG1	2.68909	CREB3	2.70176	CSMD3	2.27001
1579	RPL39	2.02584	TOX3	2.96588	GPR6	2.29761	SYNPR	2.68713	HEYL	2.69996	KIF21B	2.26942
1580	PINK1-AS	2.02488	RBP4	2.96537	ANKRD20A5P	2.29741	PTPRM	2.68481	TRIM8	2.6974	ARHGAP28	2.26893
1581	RGS17	2.02456	FARSB	2.96463	SLC37A3	2.29715	FBXO45	2.6846	RGS22	2.69721	NETO2	2.26741
1582	LOC100507351	2.0245	DRAIC	2.96448	SULT4A1	2.29623	ABCA3	2.68422	LSP1	2.69706	SOCS7	2.26721
1583	TMEM9	2.02273	TMEM119	2.96321	UBALD1	2.29584	TNNT3	2.68186	C9orf40	2.69681	GPATCH3	2.26615
1584	ADSL	2.02157	FAM196A	2.96244	GPR83	2.29566	LOC100996385	2.68038	GSTM2	2.6958	MAPT	2.26577
1585	NDRG2	2.02154	NT5E	2.96105	SNHG28	2.29434	MECR	2.67902	RPL31	2.69574	SHISA7	2.26515
1586	DHDH	2.02061	SLC1A2	2.96079	KCTD1	2.29394	TIMM17B	2.67675	MDH2	2.6949	LYNX1	2.26444
1587	IRF9	2.02005	MIR4435-2HG	2.96028	IGFBP6	2.29174	PPM1K	2.6764	HPCA	2.68971	PCDHB5	2.26421
1588	DACH2	2.02002	RPL39	2.95782	MGP	2.29143	TMEM132A	2.67628	SNX10	2.68739	PPP6R2	2.26392
1589	CD4	2.01959	NRP2	2.95762	TRO	2.29019	SCN8A	2.67449	PIPSL	2.68534	DUSP5P1	2.2621
1590	ORAI1	2.01902	IFI30	2.95728	C14orf28	2.29019	HES4	2.67427	RNASEH2A	2.68458	DUSP18	2.26163
1591	CCBE1	2.01671	BMS1P14	2.956	WDR31	2.28996	PMS2	2.67332	MTMR3	2.68397	TSR1	2.26043
1592	STX17-AS1	2.01476	RARRES2	2.95513	PTRH2	2.28983	PPM1L	2.67288	TBXA2R	2.68307	ERICH1	2.25936
1593	LAMTOR1	2.01447	DRD2	2.9545	ANKRD33B	2.28958	RCN1	2.67268	SRP19	2.67913	FLOT1	2.25797
1594	DNAH14	2.01428	ATP5PB	2.95353	SRSF7	2.28876	CDKN2D	2.67164	LOC100506271	2.67679	SLC2A12	2.25674
1595	TTPA	2.01414	KCNMB1	2.95316	ETV1	2.28779	ACAD9	2.6711	MARCO	2.67444	LMTK2	2.25628
1596	ZNF525	2.01411	EYA1	2.95251	PPIH	2.28655	TMEM181	2.67039	DNAL4	2.67403	TSHZ3	2.25603
1597	DNASE1L1	2.0136	AHCYL1	2.95241	CRIP2	2.28654	NAP1L1	2.67028	MPHOSPH6	2.67324	SNAPC2	2.25413
1598	C1orf52	2.01335	ADCY5	2.95146	RASAL1	2.28639	VDAC1	2.67015	SNRPD3	2.67278	STARD13	2.25219
1599	RAPGEF3	2.0129	ZCCHC18	2.95124	GCLM	2.28557	SCN2A	2.66992	KIAA0368	2.67257	RAB40C	2.25113
1600	PANK2	2.01042	SLC25A22	2.95075	TNKS1BP1	2.28539	TIMM22	2.66904	ATOX1	2.67176	ATP2B1	2.25075
1601	IFNGR2	2.00983	TUBA1A	2.95045	ATRN	2.28516	RNF24	2.66904	MAGIX	2.67055	SPRY4	2.25049
1602	NAALADL2	2.00783	GFM2	2.94879	CAMK2N1	2.28223	NR2F1-AS1	2.66726	DLL3	2.66865	CPT1C	2.25042
1603	ZNF577	2.00773	MAPKAP1	2.94669	NUP50	2.28026	R3HDM1	2.66676	NTNG2	2.66727	C14orf132	2.2488
1604	COX20	2.00707	CARHSP1	2.94662	GALNT9	2.27972	LOC101929066	2.66612	OTUB2	2.66634	SNX30	2.24801
1605	TRIM67	2.00614	EXOSC7	2.94602	ACOT8	2.27954	MRPS25	2.66608	ARRB1	2.66583	CNRIP1	2.24766
1606	LOC100130331	2.00576	NOP16	2.94256	COG6	2.27941	LINC00622	2.66566	LINC01315	2.66497	COG6	2.24589
1607	RAB8A	2.00481	UBR7	2.94159	GPATCH4	2.27939	ISLR	2.66525	CDC42P3	2.66466	SFTPD	2.24474
1608	FAM86C2P	2.00404	SPNS3	2.94116	ATAD3A	2.27938	LINC01197	2.66518	USP5	2.66428	MSX1	2.244
1609	EYA2	2.00382	NSMF	2.94062	TGFBRAP1	2.27862	GSKIP	2.66483	GPR155	2.6636	C16orf70	2.24329
1610	GLI3	2.00367	EEF1G	2.93997	JADE2	2.27817	PPP2R1A	2.66346	DNASE1L1	2.66347	PNCK	2.24324
1611	RAB35	2.00355	SRGAP1	2.93954	SPPL3	2.27178	TBCB	2.66316	SLBP	2.66248	ZDHHC14	2.2422
1612	SMYD3	2.0034	GNB4	2.93796	SRSF12	2.27151	NOV	2.66222	HRK	2.66191	PITPNM2	2.24182
1613	TBC1D31	2.00322	PNPLA3	2.93679	SLC25A11	2.27075	TLN2	2.66182	DDX25	2.66166	CD6	2.24133
1614	SNPH	2.00221	CANX	2.93668	SUV39H1	2.27057	SPDEF	2.6605	ALDH9A1	2.65972	FARSB	2.24101
1615	ODR4	2.00215	OBSCN	2.93233	MOXD1	2.26926	DNAJC2	2.65949	FZD7	2.65716	ATF2	2.24085
1616	DNAJC9	2.00201	HAVCR2	2.93195	FITM2	2.26833	KCNG3	2.65832	STRADB	2.6555	SORCS3	2.24037
1617	RARRES2	2.0019	RSPO4	2.92871	SERINC1	2.2674	TUSC2	2.65796	LOC728715	2.65426	AK9	2.24007
1618	PPIL4	2.00103	PIM2	2.92846	LOC105374952	2.26724	STN1	2.65621	ZNF721	2.6537	ITGA2B	2.23986
1619	RWDD4	1.99992	COL21A1	2.92838	TMEM18	2.26684	LOC407835	2.65583	P4HA2	2.65367	C2orf40	2.23965
1620	FAM167A	1.99931	HGH1	2.92716	RASAL2	2.26652	IMP4	2.65574	MAPK11	2.65291	BRWD1	2.23957
1621	CMAS	1.99706	MRPL14	2.92639	UBR1	2.26555	HSP90B1	2.65391	EMP3	2.65228	HTT	2.23932
1622	SUZ12P1	1.99643	FAR2P2	2.92513	NUDT9P1	2.26553	ZNF425	2.65384	CHPT1	2.65182	C2CD4D	2.23889
1623	ALS2CR12	1.99473	CMAS	2.92207	PRDX5	2.2641	CAPS2	2.6538	FAM53C	2.65035	APEH	2.23886
1624	GSTCD	1.99434	GUCY1A1	2.92152	SNCG	2.26397	C9orf24	2.65374	PSEN2	2.64783	NSD1	2.23846
1625	SEC24B-AS1	1.9943	BLCAP	2.9214	PRSS23	2.2622	ZNF365	2.65339	NOL4L	2.64649	AOC2	2.23816
1626	TNFAIP8L3	1.99384	LFNG	2.91963	KLHL25	2.26129	MYB	2.65326	VTI1B	2.64646	IGFBP3	2.23351
1627	CAPG	1.99351	NHLRC1	2.91891	NCDN	2.26123	RNF112	2.65141	STARD3NL	2.64628	KCNQ5	2.23225
1628	LRIG1	1.99341	GAL3ST4	2.91677	SLC29A3	2.25806	MRAP2	2.65089	DVL1	2.64584	PACRGL	2.23078
1629	TXN	1.99317	CNDP2	2.91603	ZNF845	2.25777	USP32P2	2.64973	LOC105379807	2.64551	LY6D	2.22884
1630	C2orf73	1.99247	GLIS2	2.91448	RNF111	2.2568	MRPS7	2.64934	SERPINI1	2.6453	MYOM2	2.22657
1631	NOTCH2	1.99197	IFT74	2.91428	ACE	2.25667	ASAP1	2.64922	DNAJC19	2.6417	HGS	2.22619
1632	LOC728392	1.99152	OAZ2	2.91034	SRPRA	2.25444	CHST1	2.64913	TUBB2B	2.64114	PPFIA2	2.22586
1633	KIF1A	1.99148	KLRC2	2.91022	FSTL4	2.25441	HBQ1	2.649	MDFIC	2.64107	SPATC1L	2.22578
1634	MIEF2	1.9909	RCN1	2.90934	USP5	2.25369	PHB2	2.64829	CERS4	2.6406	BNIP3	2.22565
1635	PPP1R7	1.99082	GABARAPL2	2.90897	GPX3	2.25361	PSMB7	2.64773	EYA2	2.63997	SULT4A1	2.2249
1636	CEP83	1.98945	SLC25A48	2.90822	DCTN3	2.25145	TFCP2	2.64736	THAP8	2.63968	PNMA2	2.22476
1637	SMAD7	1.98872	SIN3B	2.90703	PPP6C	2.25106	LOC100126784	2.64679	EMP1	2.63935	CYLD	2.2236
1638	TMEM126B	1.9886	CIDEB	2.90637	PSMB5	2.25072	EXTL1	2.64602	PIP4K2B	2.63612	ZNF709	2.22299
1639	CX3CR1	1.98838	SERINC1	2.90565	GRIK2	2.24962	BLOC1S2	2.64591	MRC1	2.63584	RHOF	2.22287
1640	NMNAT1	1.98828	SMOC1	2.90514	FBXO31	2.24889	CETN4P	2.64471	NEXMIF	2.63494	TMUB2	2.22038
1641	POLR2L	1.98813	KLF16	2.90327	GNAQ	2.24822	HLF	2.64456	CHRM2	2.63399	KCNB1	2.22009
1642	KLHL36	1.98706	SYDE1	2.90321	FXYD7	2.24789	SCYL1	2.64401	RRAGB	2.63257	CACNA1B	2.21953
1643	FKBP1B	1.98699	PARVA	2.90224	COG1	2.24733	RCHY1	2.64297	PPP1R9B	2.63189	LSM4	2.21891
1644	GPR75	1.98476	TYW5	2.90013	INPP4A	2.24672	DLG3	2.64293	DPYSL2	2.63051	SIRT5	2.21827
1645	TPTE	1.9839	CTSS	2.89962	NDUFAB1	2.24611	MRPL30	2.64268	SNAP47	2.62953	WDR48	2.21814
1646	RFNG	1.98373	CALD1	2.89894	KCTD2	2.24578	MARF1	2.64179	STMN1	2.62917	CHTF18	2.21629
1647	CC2D2A	1.98367	PRKRIP1	2.89816	NEU1	2.24506	FAM110C	2.64155	IL1B	2.62873	ZSCAN18	2.2158
1648	ECHDC2	1.98314	NDUFV3	2.89704	SLC25A24	2.24463	RYK	2.64091	TMEM230	2.62762	ISLR2	2.21484
1649	C6orf52	1.9831	YBX1	2.89403	COL26A1	2.24412	PTDSS1	2.6392	SAMD4A	2.62522	CCDC6	2.2145
1650	SMARCE1	1.98132	FHOD1	2.89382	APBB1	2.2429	ATP5F1A	2.63817	FBLN1	2.62208	ACTR1A	2.21397
1651	TAGLN3	1.98078	TAGLN2	2.8915	SPATS2	2.24189	ZDHHC7	2.6374	TMEM42	2.61993	TRMT61A	2.21299
1652	C20orf204	1.97978	HEPH	2.88969	AMZ2	2.24181	PURG	2.63699	EMG1	2.61962	NHLRC1	2.21294
1653	ANKRD18CP	1.97939	ANAPC13	2.88881	FBXO45	2.24023	PRPF6	2.63394	GS1-124K5.4	2.61807	TCOF1	2.21216
1654	ZFAND6	1.97846	RAC1	2.88701	DNAJC5	2.23873	LDHC	2.63349	LOC440434	2.61589	TRA2A	2.21211
1655	HMG20A	1.97786	TPD52L2	2.88543	JMJD4	2.23861	CNTN4	2.632	LOC101060091	2.61181	EFHC2	2.21125
1656	SYF2	1.9765	SAMD14	2.88481	RNF167	2.23814	UQCRHL	2.63175	ARL10	2.61062	RNF121	2.2095
1657	LGALS9C	1.97623	NPY	2.88478	DENND2D	2.23777	WDR45	2.63058	IL17RD	2.60849	PRPF19	2.20747
1658	EPHA7	1.97595	OXER1	2.88471	RIMBP2	2.23717	TUBB6	2.63054	ONECUT1	2.60839	NRSN2	2.2073
1659	APTX	1.97529	FOXA2	2.88316	PIANP	2.23691	TMEM121B	2.62999	RNF175	2.60807	SELENOI	2.20661
1660	PPIL6	1.97508	HBZ	2.88283	ATP6V1H	2.23526	DEPP1	2.62719	BASP1	2.60772	NDUFC2	2.2064
1661	ZNF69	1.97506	LINC01315	2.88263	ASAP1	2.2348	TAMM41	2.62644	GFPT1	2.60693	GCNT1	2.20561
1662	SBDSP1	1.97488	VAV2	2.88151	TUBB3	2.23469	TMEM242	2.62636	OBSCN	2.60649	C12orf43	2.2044
1663	ALDH7A1	1.97481	SLC41A3	2.88114	MCM4	2.2344	AMIGO2	2.62505	LTBP4	2.60614	AFAP1	2.20328
1664	LGALS3	1.97461	ADAM28	2.8803	LAGE3	2.22829	ATRN	2.62413	JMJD4	2.60528	LIMD2	2.20311
1665	GLP2R	1.97434	XRCC6	2.87724	NEUROD1	2.22726	TPGS2	2.62311	MXRA8	2.60508	NUP85	2.20183
1666	SMOC1	1.97391	SEZ6	2.87596	CHCHD6	2.22676	PRKD1	2.61762	GPRIN1	2.60323	FHL3	2.20141
1667	VANGL1	1.97378	AHRR	2.87561	SPATS2L	2.22552	SQSTM1	2.61366	AP2M1	2.60256	2004-03-01	2.20115
1668	ALDH4A1	1.97353	LOC102724156	2.87521	HMGCLL1	2.2241	RNMT	2.61355	CAPN12	2.60046	RCN1	2.2007
1669	PIPSL	1.97338	KPNA2	2.87413	C2CD4C	2.22334	MED14OS	2.61299	KLHL25	2.59987	MIF	2.20039
1670	LINC00674	1.97182	HADH	2.87402	LGALS8	2.22291	TSN	2.61286	WNT4	2.59901	RAB33A	2.20013
1671	CH25H	1.96741	EFCC1	2.87319	COPS4	2.22136	UQCC1	2.61177	JMJD1C-AS1	2.5989	ANO5	2.19969
1672	ABI1	1.96731	MRPL13	2.8731	STAU1	2.2211	RHEB	2.61106	B4GALT3	2.59794	ARHGEF28	2.19863
1673	ZNF229	1.96659	CYB5R3	2.87145	HSPA4	2.22094	GATAD2B	2.61045	GPR88	2.5973	ZMYND19	2.19836
1674	CDKN2D	1.96657	CHST1	2.87142	KLHL4	2.22033	GSTA4	2.6087	GRIK5	2.59669	DENND2D	2.19783
1675	DLEC1	1.96639	C16orf89	2.87028	PITRM1	2.2198	KAT5	2.60695	KLRC2	2.59659	TMEM200C	2.19603
1676	KCTD7	1.96606	FLRT1	2.86832	SMCO2	2.21913	SUCLA2	2.60681	RALGPS2	2.59657	C16orf45	2.19584
1677	C19orf33	1.96323	CNGB1	2.86778	FXYD6	2.2187	RPP40	2.60615	DUSP19	2.5952	RANBP2	2.19526
1678	STRIP2	1.9627	ACAD10	2.86684	NAPEPLD	2.21825	ADSS	2.60589	UBE2L6	2.59426	RABAC1	2.19514
1679	KLRC1	1.96253	EFNA2	2.86635	PNLDC1	2.21739	IGSF11	2.60497	ACACA	2.59312	GMCL1	2.19464
1680	CFLAR	1.96213	DPYD	2.86617	INSM1	2.2158	KIRREL3	2.60433	STMN4	2.59205	SLC2A13	2.1928
1681	ANAPC10	1.96104	BFSP1	2.86607	ARMCX3	2.21532	ATXN3	2.60371	ZNF229	2.59109	FOXP2	2.19102
1682	NECTIN2	1.95872	DNAH2	2.86511	TMTC1	2.21516	C6orf106	2.60351	RPL36	2.58937	B9D1	2.19091
1683	CHD3	1.95863	HLA-F	2.86493	FAXC	2.2136	STAT4	2.60341	LOC100049716	2.58867	CHRNA7	2.18859
1684	RASAL3	1.9585	TUB	2.86319	FXR2	2.21332	PUS7	2.60291	MRPL44	2.58754	ZNF542P	2.18755
1685	CCL28	1.95722	IDH1-AS1	2.86161	PTPRK	2.21144	GRM8	2.60245	CTR9	2.58727	WIPF3	2.18717
1686	TMEM167B	1.95714	CALB2	2.85836	SMC1A	2.21117	ENPP4	2.60069	UBR1	2.58663	EDN1	2.18694
1687	PCP2	1.95664	SAMD4A	2.85792	SPIN1	2.21015	MAP1S	2.59982	C17orf58	2.58648	ZNF304	2.18668
1688	LOC101926934	1.95596	TNIP3	2.85764	HTR1A	2.20799	DBT	2.59802	MFAP4	2.58467	FAM168B	2.18662
1689	HS3ST4	1.95563	NDUFA3	2.85602	APRT	2.20743	ADCK1	2.59591	HDC	2.58419	HLF	2.18576
1690	ITGAE	1.95479	HDDC2	2.85519	ZNRF4	2.2066	KIAA1211L	2.59405	FAM111A	2.58339	HOPX	2.18444
1691	CCDC152	1.95473	TREM2	2.85462	FAM210A	2.20548	AKR7A2P1	2.59393	PPP2R2A	2.58317	SARS2	2.18442
1692	CMBL	1.95444	SUSD1	2.85437	IDH3B	2.20454	DMAC1	2.59218	GNG10	2.58052	SLC1A4	2.18268
1693	LOC100130705	1.95009	HLA-DMA	2.85419	GSK3A	2.2042	CNTN1	2.59213	ANKRD19P	2.57958	CASQ1	2.18222
1694	C11orf58	1.94938	ZNF706	2.8515	TRIM27	2.20318	GMPR2	2.59153	USP51	2.57924	TMED10	2.18091
1695	CBX1	1.94912	BEX3	2.85107	SSRP1	2.20256	MEGF9	2.59136	MAP4K3	2.5752	PIK3CD	2.17898
1696	PDCD5	1.94816	TTYH3	2.85104	USP39	2.20217	MAPK9	2.5902	NR2E1	2.57497	SMG7	2.17714
1697	SPTBN1	1.94805	SCOC	2.84886	MRPL37	2.20196	THRB	2.58929	BBOX1	2.5745	2007-03-01	2.17528
1698	DSP	1.94794	B4GALNT4	2.84811	ARMC2	2.20091	SLC37A3	2.58822	CAPNS1	2.5723	SH3BP5	2.17462
1699	HLA-DRB4	1.94752	FIBCD1	2.84567	FBXL18	2.20083	STOML2	2.58766	DDIT4L	2.57134	ARHGAP12	2.17325
1700	LOC100049716	1.94745	CRELD2	2.84466	KLF8	2.20074	KCTD1	2.5833	GLUD1	2.57123	MSMO1	2.17316
1701	FKBP1A	1.94692	PRKAG1	2.84321	STUB1	2.20031	GGNBP2	2.58176	CALB1	2.57009	HACD2	2.17298
1702	BARD1	1.94576	RPL12	2.84201	MYO7A	2.19938	TDRD7	2.58172	FANCL	2.56975	TEDC2	2.17289
1703	BHLHE22	1.94479	CACNG1	2.83776	JPH4	2.19919	MEIS3	2.58075	MIF	2.56801	PLPPR3	2.17082
1704	NXN	1.94446	CD3D	2.83724	POLE3	2.1966	NKD2	2.57973	GLI1	2.56604	C10orf88	2.16975
1705	LRRC7	1.94441	NDUFB3	2.83667	FAP	2.19621	SNAP25	2.57912	GINS2	2.56504	ZNF667	2.16953
1706	NKAIN4	1.94412	KRTAP10-9	2.83507	CFAP44	2.19618	NR2F6	2.57771	COPZ1	2.56472	PRSS2	2.16817
1707	SRM	1.94384	GSTM5	2.83418	TNNT2	2.19617	ETV1	2.57736	COL16A1	2.56424	SPAST	2.168
1708	DDB1	1.94201	SERP1	2.83335	MED10	2.19481	LAMA2	2.57647	SHISA7	2.56347	NPDC1	2.16375
1709	TFEC	1.94141	NACA	2.83305	MSX1	2.19398	RASAL1	2.57625	CYP4Z1	2.5633	PSMD1	2.1621
1710	RGMB	1.93924	ATP13A4	2.83292	LOC341056	2.19374	CHRNA4	2.57589	PTCH1	2.56148	PRKN	2.1616
1711	RBFOX2	1.93909	ENPP1	2.83176	PGK1	2.19219	MED16	2.5752	NMT1	2.56135	STBD1	2.16148
1712	PARP14	1.93902	NDUFA13	2.83113	ZNF391	2.19075	KCNB2	2.57409	ZIC5	2.5606	AKAP5	2.16072
1713	TLR2	1.93795	CH25H	2.82966	IGHMBP2	2.18899	SYDE2	2.57321	SMO	2.55954	MKX	2.15599
1714	PYGB	1.93792	PDXP	2.82902	AHCY	2.18853	MAP10	2.57112	DPYSL4	2.55595	COL4A3BP	2.15353
1715	CAMK2D	1.93713	PAX4	2.82726	DHX8	2.18798	ZFAND2B	2.57048	CMIP	2.55586	RNF187	2.15094
1716	NACC1	1.93696	ITGB5	2.8268	DUS2	2.18681	COL26A1	2.56885	FUT9	2.55564	CLASP2	2.15049
1717	CEBPA	1.93537	SNTB1	2.8267	PPIAP30	2.18664	ZNF829	2.56783	GRIK3	2.55552	SLITRK4	2.15012
1718	EXOSC2	1.93496	IDH1	2.82589	ONECUT1	2.18659	RITA1	2.56687	LRCH2	2.5545	RPH3A	2.14991
1719	PAPLN	1.93309	VENTX	2.82545	GRB14	2.18597	TBC1D24	2.5667	TRIB3	2.5541	LEPR	2.14921
1720	TMEM119	1.93305	LTBR	2.82315	TMEM132D	2.18344	STAR	2.56603	FOXG1	2.55133	AIFM2	2.14908
1721	TMEM50B	1.93292	TTC3P1	2.82263	TMEM132A	2.18312	AMBRA1	2.56595	CACHD1	2.55077	GNG3	2.14866
1722	IMPA2	1.93182	CTH	2.82254	PEX5	2.18285	DHRS4	2.56594	ERI3	2.55044	ATP8A1	2.14804
1723	CCDC77	1.93159	LPCAT2	2.82219	MAN1B1	2.18209	SPATS2L	2.56542	CIB2	2.55032	UBFD1	2.14797
1724	ST5	1.93053	LOC728392	2.82085	TAB3	2.1816	KCNN2	2.5634	ZCCHC17	2.55025	C16orf95	2.14787
1725	FBXO2	1.92986	TSKU	2.8203	ELOVL6	2.1816	FOXP4	2.56242	POLR3GL	2.55015	FBXO40	2.14784
1726	PCLO	1.92797	NRL	2.8193	ASPHD2	2.18151	MVK	2.56207	CREG1	2.55005	FAM163B	2.14677
1727	ABHD2	1.92768	RPL21P44	2.8192	CNN1	2.17996	FLII	2.56137	ARHGAP36	2.5496	MAEL	2.14658
1728	POTEF	1.92754	MAGEA6	2.81906	KNSTRN	2.17984	WDR34	2.55898	GLG1	2.54885	ZNF331	2.14558
1729	HSD17B14	1.9263	SYNGR4	2.81864	KIAA1656	2.17914	ATF2	2.55853	AGTPBP1	2.54857	MBNL1	2.14531
1730	ZNF300P1	1.92565	FERMT2	2.81704	CIDEC	2.17882	LY6D	2.55822	VPS37B	2.54645	STX6	2.14366
1731	ALKBH5	1.92518	RPL23AP7	2.81701	RECQL4	2.17761	RSPH3	2.55791	METTL1	2.54624	VPS37D	2.14348
1732	FIBCD1	1.92342	C12orf73	2.81662	UNC5D	2.17735	RIMS2	2.55776	EMC3	2.5447	LOC100507387	2.14343
1733	PACRG	1.92334	GFRAL	2.81619	STXBP5	2.17611	ATP6V0D1	2.55739	P2RY1	2.54362	EPB41L3	2.14175
1734	GPR83	1.92288	CDH11	2.816	CCDC51	2.176	MRPL36	2.55605	C5orf30	2.54339	VASH1	2.14165
1735	LOC728989	1.92248	ANKRD19P	2.81501	CYLD	2.17557	FOXRED1	2.55387	AMZ2P1	2.5419	GPR162	2.14099
1736	IL10RB	1.92178	FDX1L	2.81405	PRKAB2	2.17429	ATP2A2	2.55206	TEAD1	2.54059	POLR3E	2.14035
1737	PLAC4	1.92088	COQ5	2.81393	YIPF2	2.17397	ZNF826P	2.55192	C6orf118	2.53882	CAMKK2	2.13954
1738	XRCC4	1.92056	BCORP1	2.81295	TLK1	2.17352	CYS1	2.55085	ZNF826P	2.53693	GALNT13	2.1383
1739	NACA2	1.9205	TEAD1	2.81067	MYO5A	2.17101	F13A1	2.54974	MT1JP	2.53655	NAGPA	2.13673
1740	FZD1	1.91997	FOXN3-AS1	2.81017	JAKMIP1	2.17064	XRCC6	2.54858	GLUD2	2.53519	USP43	2.13599
1741	CXCL16	1.9198	STON2	2.80989	RAB39A	2.16997	MCCC1	2.54559	AP3B2	2.5335	CYP26B1	2.13533
1742	ZNF575	1.91892	SLC4A11	2.80952	ALPL	2.16874	EPB41L4B	2.54534	PGAM1	2.53263	CES4A	2.13457
1743	PTPN13	1.91705	CDK16	2.80932	PIP4P1	2.16777	NUDT2	2.54533	MT1X	2.53045	MFSD6	2.13427
1744	PRSS3P2	1.91661	FGFR4	2.80872	CD8A	2.16773	TFPT	2.54533	ERBB4	2.53041	TAPT1	2.13427
1745	SLC27A1	1.91614	HIST2H2AB	2.80869	MZT1	2.16742	ZNF350	2.54524	CHDH	2.529	LOC400684	2.13411
1746	PTPRN2	1.91524	AOAH	2.80836	PPEF1	2.16667	FAM174B	2.54474	EBNA1BP2	2.52653	IDH3B	2.13308
1747	SH3RF3	1.91512	EPHA10	2.80834	COG5	2.16662	TMEM56	2.54423	STEAP1	2.52609	CFAP52	2.13247
1748	ATP6V0E1	1.91491	PDGFC	2.80798	MYO1B	2.16598	USP21	2.54341	INTU	2.52549	LYPD8	2.13245
1749	CELF5	1.9129	ACOT13	2.80789	GDAP1L1	2.16547	PPAT	2.54245	RARA-AS1	2.52505	TTLL7	2.13242
1750	RUBCNL	1.91287	ERGIC3	2.80714	YRDC	2.16412	RIC8A	2.54234	ALPL	2.52351	TAOK1	2.12781
1751	RPL22L1	1.91155	OR7E14P	2.80656	RHOF	2.16391	SARS	2.54013	TMEM65	2.52305	MYLIP	2.12579
1752	PPIB	1.91138	PSMB6	2.80473	SLC49A3	2.16383	CACNG3	2.53961	BAIAP2	2.52233	IPO8	2.12523
1753	PTEN	1.91086	GDA	2.80326	UTP6	2.16344	TMEM132D	2.5395	SSC4D	2.52134	MFSD3	2.1252
1754	JPH4	1.91067	TPT1	2.80085	TUBA3FP	2.16305	NGEF	2.53869	NPAS3	2.51884	PDHA1	2.12369
1755	PRSS1	1.90976	MRPL51	2.79939	ZFAND2A	2.16298	GPR162	2.53837	AKAP8	2.5184	PUM2	2.12354
1756	RAB2A	1.90963	ELK1	2.79824	SLIT1	2.16206	CARNMT1	2.53741	ACO2	2.5184	ADAR	2.12284
1757	CYB5R3	1.90806	FSIP1	2.79622	KCTD21	2.16185	PGAM1P5	2.53677	ST20	2.51818	PLEKHA5	2.12275
1758	AXL	1.90674	CNR2	2.79553	MEGF9	2.16012	MLXIPL	2.5364	RC3H2	2.51801	PRSS16	2.1225
1759	HDGF	1.90649	CHRNA3	2.7955	PPP1CA	2.15912	COL10A1	2.53605	ECHS1	2.51741	THUMPD2	2.11816
1760	NADK2	1.90613	CFAP61	2.79502	CLCN6	2.15852	TMEM53	2.53562	CPEB2	2.51706	TECPR1	2.11792
1761	ACY3	1.90526	ITM2C	2.79419	PDE1A	2.15719	NIP7	2.53488	JAG2	2.51675	WDR34	2.11624
1762	TLL1	1.90497	HPCAL4	2.7938	SCPEP1	2.15585	VPS72	2.53346	PLPBP	2.51627	UGCG	2.11622
1763	STAG3	1.9047	CAVIN3	2.79358	ACTR1B	2.15576	RGS12	2.53301	RFX3	2.51615	AHRR	2.11541
1764	EPHX2	1.90318	SNHG16	2.7933	MEA1	2.15535	PPIE	2.5325	INPP5K	2.51607	USP9X	2.1146
1765	UBL7-AS1	1.90292	SLC25A26	2.78967	HTR5A	2.15494	TMEM203	2.53218	LASP1	2.51428	RMND1	2.11452
1766	RAI14	1.90262	MLH1	2.78929	VPS41	2.15484	FAM210A	2.53156	PPP2CB	2.51358	TRIM66	2.11121
1767	EGLN3	1.90232	AP5S1	2.78846	USP11	2.15478	MORN4	2.53014	METTL6	2.51305	N4BP2L1	2.10989
1768	IFI16	1.90165	ZNF517	2.78836	ELAVL3	2.15413	KLK10	2.52763	RBM43	2.51303	FCHO1	2.10982
1769	SLC46A1	1.90126	GPR143	2.78773	GAS7	2.15177	RTL6	2.52482	ERLIN1	2.51243	NCK2	2.10974
1770	ZNF286A	1.89923	RSPH9	2.78751	NGEF	2.15154	ARL14EP	2.52228	NUTF2	2.51162	C6orf106	2.10842
1771	FBXO3	1.89913	CLU	2.78741	NTRK2	2.15058	SPRED2	2.52091	MMS19	2.51115	USP11	2.10774
1772	C1orf194	1.89871	PCSK5	2.78722	SLC1A6	2.14887	METTL9	2.52031	HOPX	2.50941	TMEM74	2.10771
1773	IFIT3	1.89831	MDGA1	2.78539	CYS1	2.14818	TRIAP1	2.52009	FDFT1	2.50918	FAM192A	2.10751
1774	ANP32D	1.89753	RAN	2.78488	MYH7	2.14709	SDK1	2.5197	MED8	2.50877	GPR63	2.10736
1775	CGREF1	1.89727	JUN	2.78123	FZD3	2.14651	RXRB	2.51802	WDR7	2.50843	FNDC11	2.10707
1776	SHISA6	1.89408	FYN	2.78028	LGALS1	2.14609	MYT1L	2.51673	WAC-AS1	2.50665	LOC100507642	2.10431
1777	ANO2	1.89228	SLC4A4	2.78002	TPRG1L	2.14494	FXYD7	2.51648	SULT1C4	2.50497	MBD1	2.10416
1778	GSR	1.8916	NUP37	2.77978	NOP16	2.14353	LGI4	2.51229	GUCY1B1	2.50467	PFN2	2.10388
1779	LINC01607	1.89097	FRMPD3	2.77942	2001-03-01	2.1429	ZC3H12B	2.51035	SELENON	2.50289	ROCK2	2.10328
1780	TYROBP	1.89078	LY96	2.77876	NPEPPS	2.14215	ZNF354A	2.50887	TOX3	2.50276	RALA	2.10226
1781	RPS10	1.89043	AMPD2	2.77691	CTAGE7P	2.14165	CHCHD6	2.50842	C22orf23	2.4999	ACTA1	2.1013
1782	LTBP4	1.88994	PCOLCE2	2.77575	SH2B3	2.1399	B3GALT2	2.50754	PTN	2.49664	GLS	2.10117
1783	WBP11	1.88557	TAAR8	2.77501	CYHR1	2.1398	MKKS	2.50705	TGFBI	2.49645	TMEM267	2.09964
1784	RPS6KA2	1.88539	SP100	2.7741	LRCOL1	2.13965	FAR2P1	2.50695	TOLLIP	2.49619	PIM2	2.09807
1785	TSTD1	1.88527	LINC01140	2.77307	C2orf80	2.13896	RPS6KL1	2.50691	KCNB2	2.49544	LRRC61	2.09805
1786	ADAM19	1.88523	ZNF229	2.77304	GLS	2.13873	MRPL37	2.50568	SPCS3	2.49543	PCLO	2.09705
1787	SETD3	1.88417	AGFG2	2.77096	MRPS24	2.13754	MAPK8	2.50537	ABHD1	2.49411	GNB5	2.09596
1788	SMIM10L1	1.88377	PRKCG	2.77025	TPD52L2	2.13718	RTKN2	2.50507	ALDH4A1	2.49388	FN3K	2.09407
1789	DNAH5	1.8828	INTU	2.76941	RNF121	2.13595	ACE	2.50336	TSPAN2	2.49296	RUNX1T1	2.09392
1790	DGKG	1.88254	TMBIM6	2.76897	RRAGC	2.13434	UBE2D4	2.50218	HMGCLL1	2.49076	LOC101930085	2.09344
1791	LSM5	1.88171	HMHB1	2.76856	PDGFD	2.13411	KCNF1	2.50158	SYT10	2.49024	ARL8B	2.09309
1792	GNG12	1.88165	GLTPD2	2.76593	SAMD14	2.13392	RUSC2	2.5011	NSMF	2.48933	ABCB8	2.09248
1793	TIMM8B	1.88122	TP53BP2	2.76576	RSPH3	2.13374	UGCG	2.49919	WDR25	2.48927	ZNF436	2.09244
1794	MYCN	1.88043	CISH	2.7653	ADAM11	2.13271	CDKN2A	2.4981	VMA21	2.48736	GABRA4	2.09195
1795	TMED8	1.88028	CD151	2.76255	SLC1A1	2.13225	SSRP1	2.49784	FAM86EP	2.48625	SAMD14	2.09096
1796	CREB3	1.87998	RITA1	2.76234	STK19	2.13199	C2CD2L	2.49775	RDH11	2.48445	C1orf194	2.09025
1797	NCAPG2	1.87986	MRPS15	2.76069	LOC728392	2.13002	CBLL1	2.49759	CD151	2.4836	SLC9A7	2.09017
1798	MERTK	1.87975	DHX58	2.75821	TPK1	2.12992	KLHL18	2.49655	RUBCNL	2.48074	NDP	2.08993
1799	NEK6	1.87975	PPP2R3C	2.75709	CCDC189	2.12895	PLEKHG5	2.49386	CRNDE	2.47997	DLGAP1	2.08986
1800	SUSD1	1.87971	BTN2A3P	2.75632	ATP2A2	2.12809	DNAJC16	2.49256	RBFA	2.47983	OR2M1P	2.08939
1801	ZNF277	1.87871	ARHGAP18	2.75627	TSPYL1	2.12682	AHR	2.49156	PPP1R32	2.47744	NEURL4	2.08934
1802	ADAD2	1.87837	GDE1	2.75558	DNAJC13	2.1265	NXPH2	2.49135	BAIAP2L2	2.47725	SEC23A	2.08899
1803	DTYMK	1.8777	PSMC6	2.75535	ZSCAN18	2.12629	TRO	2.4912	MIR7-3HG	2.47701	ZNF567	2.08881
1804	LINGO1	1.8771	SNAPC5	2.75427	ERLIN1	2.12199	MSMO1	2.49043	SNHG16	2.47484	AP2M1	2.08749
1805	ZMAT2	1.87646	PHF10	2.75424	CBLN2	2.12094	TIMM10	2.4904	C1orf220	2.47436	POPDC3	2.08642
1806	FABP5	1.87616	CBX1	2.75338	ZNF365	2.12052	ARHGEF9	2.4903	MT1B	2.47386	CTXN3	2.08499
1807	TCTN1	1.87591	ECHDC3	2.75315	LOC100129291	2.11942	EFCAB1	2.48833	ZNF239	2.4719	RXRB	2.081
1808	TCF7	1.87559	SPATA18	2.7523	ERICH3	2.1186	MS4A15	2.48728	SELENOI	2.47127	ZNF513	2.08054
1809	DCHS1	1.87538	FAM171A2	2.75226	GMFB	2.11804	PWARSN	2.48685	UBE2M	2.47025	PREP	2.0805
1810	UFC1	1.87311	TCTEX1D2	2.7494	MEIS3	2.11745	NAV3	2.48684	RAB32	2.4689	NUDT18	2.07993
1811	GYPC	1.87292	PPDPF	2.74907	TCTA	2.11523	FBXO44	2.48663	CETN3	2.46802	SYT14	2.07985
1812	MGST1	1.87277	TRPV6	2.74863	ZNF425	2.11502	NT5DC3	2.48654	LOC102724156	2.46764	HTR2A	2.07904
1813	FAM149A	1.87223	SOD1	2.74797	SLC35C2	2.11486	NPAS1	2.48533	RYR3	2.4659	SHISAL1	2.07786
1814	PRAM1	1.87208	CDK5R2	2.7467	ABCF1	2.11371	CLCN5	2.48501	PMM1	2.4658	SPTLC1	2.07736
1815	ENPP1	1.87204	TPP1	2.74625	C1orf115	2.11283	AP4M1	2.48236	PTRHD1	2.46458	ARMC2	2.0751
1816	RBM3	1.8718	FTH1	2.74597	OXCT1	2.11133	PPRC1	2.4823	HTR4	2.46426	STK32C	2.07498
1817	KLRG1	1.87012	RAB3D	2.74573	ACVR1B	2.11006	ARHGEF28	2.48074	FAM47E	2.46362	TRAM2	2.07387
1818	TMEM128	1.869	EN2	2.74554	MOAP1	2.10816	RARB	2.47962	FCGBP	2.45978	2001-03-01	2.07293
1819	PSPH	1.86883	FTHL17	2.74525	PACS1	2.10624	CITED4	2.47945	TMEM70	2.45889	MOCS3	2.07289
1820	TP53TG1	1.86716	OPRK1	2.7443	GPATCH2	2.10547	ST8SIA5	2.47936	PDLIM3	2.45567	STXBP1	2.07258
1821	PYCR1	1.86686	DENND2A	2.74429	GNAZ	2.10434	XKR9	2.47846	STK16	2.45567	KCNH7	2.06908
1822	MAN2B2	1.86672	KLHDC8B	2.74398	HCCS	2.10394	MYH7	2.47753	RNF24	2.45465	ADSS	2.06709
1823	SUMF1	1.86605	LRP10	2.74271	TRPC4AP	2.10278	TIMM29	2.47612	OSBPL8	2.45336	NR4A3	2.06692
1824	MR1	1.86603	ARHGEF19	2.74223	CCNDBP1	2.09818	SKP1	2.47502	AP2S1	2.45228	RHBDD2	2.06576
1825	RAB29	1.8649	ARSF	2.74205	TUSC2	2.09659	TM7SF3	2.47473	MRPS16	2.45034	ZNF280A	2.06465
1826	TENM1	1.86406	POTEF	2.74171	GLO1	2.09479	MKX	2.47407	DNAJC5	2.44976	ZBTB41	2.06409
1827	TOMM7	1.86367	JPH3	2.74109	TAF6	2.09285	ATP2B4	2.47276	B4GALNT4	2.44968	RGMB	2.06219
1828	INSM1	1.8628	DERL2	2.74091	TNNT1	2.09274	CFAP20	2.47249	CD163	2.44962	TERF2	2.06128
1829	RSPH14	1.86253	WDR13	2.74069	NDUFB3	2.0919	LOC440084	2.47002	C17orf51	2.44788	HDAC10	2.06092
1830	FKRP	1.8625	RGN	2.74025	RAD23A	2.09176	LRCOL1	2.46943	DNAL1	2.44787	CIT	2.05955
1831	GFM2	1.86221	PRAF2	2.7396	PRUNE2	2.09164	IFITM10	2.46926	TRIM71	2.44758	HACL1	2.05948
1832	SMIM10L2A	1.8619	PDPK1	2.73871	RIC8A	2.09162	RAD1	2.46838	PCDH15	2.44586	BZW1	2.05945
1833	B2M	1.86126	TMED1	2.73791	XKR9	2.0911	USP43	2.46695	CNGB1	2.44498	SNAP47	2.05916
1834	NBPF1	1.86105	B4GALT1	2.737	FEM1B	2.09092	TMEM107	2.46663	TTC3P1	2.44439	KLF10	2.05843
1835	SRSF4	1.86017	DNER	2.73574	KCNS2	2.08775	CXXC5	2.46614	ARRB2	2.44428	MIB1	2.05842
1836	KLHL5	1.86006	METRNL	2.73551	RBBP7	2.08768	CNTN6	2.46502	SLC27A2	2.44375	RAB23	2.05669
1837	S100A2	1.85859	NSDHL	2.73548	CAB39	2.08526	MAPK12	2.46414	GSPT2	2.44283	CNOT4	2.05641
1838	PPP2CB	1.85681	ANKRD35	2.73312	RARB	2.08424	MAPK4	2.46401	GRID2	2.44276	FUT9	2.05598
1839	LONRF3	1.85587	MYOG	2.73293	TBCD	2.08415	SFXN4	2.46347	RPL39L	2.44247	NOL9	2.05583
1840	PTDSS1	1.85483	DIAPH2	2.73289	ABCA3	2.08415	LDB2	2.46331	RPL7L1	2.44145	ANK3	2.05481
1841	ANKRD18B	1.85465	BAP1	2.73286	PREP	2.08406	FAM206A	2.46179	DHCR24	2.44138	KIAA1468	2.0544
1842	GALNT7	1.85344	C7orf50	2.7324	KIFAP3	2.08324	WDR24	2.46054	GYG2	2.43959	TARBP1	2.05437
1843	ZNF710-AS1	1.85246	RCHY1	2.73005	GGCT	2.08299	OTUD1	2.45918	INPP4A	2.43952	TSPYL2	2.05417
1844	LEF1-AS1	1.85215	OAZ3	2.72921	MYT1L	2.08246	AP2A1	2.45711	SOBP	2.43915	MAN2B2	2.05407
1845	VWA5A	1.85186	SEC61B	2.72845	MRPL4	2.08159	CYP26B1	2.45693	MT1A	2.43892	CHID1	2.05183
1846	AIM2	1.85166	SSC5D	2.72702	PIM2	2.08143	SPRYD7	2.45608	NMNAT1	2.43858	FAM57A	2.05168
1847	HMGCS2	1.85159	SSC4D	2.72587	TIMM44	2.08137	CYTH2	2.45595	NR1H3	2.43831	LINC00680	2.05145
1848	GPATCH11	1.85145	TIMM13	2.72369	CNIH3	2.07956	FBXO25	2.45508	AKR7L	2.4369	GPR88	2.05127
1849	EIF3E	1.8504	PJA1	2.72313	ACAD9	2.07867	TANC2	2.45492	MMAB	2.43532	TMEM91	2.04917
1850	DYNLRB2	1.84962	TRIM17	2.72205	NRBP1	2.07776	FBXW2	2.45478	SMPDL3A	2.43495	ONECUT1	2.04914
1851	AKAP13	1.84951	UBE2B	2.72186	MVD	2.07641	SDF2	2.45257	OLFM3	2.43409	CEBPA	2.04829
1852	RCN1	1.84945	OLMALINC	2.72156	FBXW7	2.07311	COPS4	2.45181	DNAJB6	2.4333	ZMYND8	2.04826
1853	FPR1	1.84942	ZDHHC24	2.72139	R3HDM1	2.07305	STEAP1B	2.45168	GUF1	2.43263	CKB	2.04582
1854	DNAJB2	1.84847	PMM1	2.72095	TRAPPC6B	2.07261	RBBP7	2.45138	ANKRD28	2.42993	MAN1C1	2.04525
1855	FAM27E2	1.84593	PARP14	2.71954	ZGPAT	2.07182	PTK2B	2.45096	MAN2B2	2.42843	ANKRD27	2.04507
1856	CENPM	1.84542	NCAM2	2.71906	SIRT3	2.07173	PNCK	2.45089	IPO8	2.42506	HECW2	2.04272
1857	SH3KBP1	1.84531	CD59	2.71897	FBXW9	2.07142	L3MBTL4	2.45041	FJX1	2.42388	LOC399815	2.04269
1858	TPP1	1.84492	HIST1H2BM	2.71869	SIN3B	2.07021	MSANTD1	2.45037	DHDH	2.4226	RAET1E-AS1	2.04116
1859	CARD6	1.84472	BLOC1S2	2.71516	TMUB2	2.07003	CNRIP1	2.45003	PNP	2.42257	STXBP5	2.04077
1860	TSR3	1.84427	LIMS1	2.71466	HTR3B	2.06911	PXMP4	2.44993	NUP85	2.42232	RBP4	2.03991
1861	BIRC2	1.84329	FAM47C	2.71441	NIPSNAP1	2.06772	RIMS3	2.44952	ZZZ3	2.42214	SVEP1	2.03918
1862	PRTFDC1	1.84302	CNTN1	2.71431	SCN8A	2.06653	RRP15	2.4493	RHOD	2.42075	TPM3	2.03764
1863	OR7E14P	1.84201	GJB6	2.71293	MAP1S	2.06548	KIAA1656	2.44851	SOX3	2.42061	BZW2	2.03652
1864	PTPN23	1.84169	XRCC4	2.71193	ZNF576	2.06547	CPEB1	2.44767	IARS	2.41762	SLC30A4	2.03547
1865	SERP1	1.8409	NUS1	2.71148	DGUOK	2.06503	LINC00958	2.4469	PCMT1	2.41714	AP2S1	2.03482
1866	ACVR2A	1.84069	FAM105A	2.71144	ATP2B1	2.06468	GRIA2	2.44392	SREBF2	2.41646	FAM50A	2.03434
1867	SRSF2	1.83924	TCP1	2.71113	MLF2	2.0597	PDK2	2.44368	SPHKAP	2.41592	TCEANC	2.03425
1868	ANKS1B	1.83779	ECEL1	2.71031	KCNMA1	2.05826	LCE3C	2.44358	CDC42EP4	2.4156	ADPRHL1	2.03184
1869	BMP7	1.83756	SMIM27	2.70945	APBB3	2.05802	TPRG1L	2.44238	STMN2	2.41508	ADGRL1	2.03129
1870	NMB	1.8369	NFKBIE	2.70874	PYCR3	2.05749	PDGFA	2.44087	INCENP	2.41479	MOK	2.03107
1871	KDELR2	1.83684	DUSP15	2.70741	RABEP1	2.05708	UBE2D2	2.43915	CAND2	2.41376	FBXW7	2.03047
1872	CD14	1.8368	OR2B11	2.70706	DNAJC2	2.05619	NUDT11	2.43853	RAB13	2.41292	GPR20	2.03046
1873	GRM1	1.83651	TSPAN18	2.70638	NDFIP2	2.05619	FASTKD5	2.43846	STAT6	2.41262	CSRNP3	2.02888
1874	C2orf80	1.83636	MANF	2.70574	DMTN	2.05494	ACTR10	2.43633	LOC728485	2.4126	GLT8D2	2.02781
1875	SIGLEC11	1.83588	SLC35G3	2.70478	RPRM	2.05455	PPP1CA	2.43566	GPC5	2.41255	DOCK9-AS2	2.02762
1876	HMGA1	1.8355	MYD88	2.70424	PRKCI	2.05296	ZRANB1	2.43467	RNASET2	2.41249	PLCXD3	2.02754
1877	LRRC4B	1.83509	SPACA3	2.70407	PRKCE	2.05234	WFDC1	2.43444	RHPN2	2.41246	SHISA8	2.02669
1878	FAM111A	1.835	NNAT	2.70384	GABARAPL1	2.04782	GPM6A	2.43443	SMIM27	2.41073	C9orf72	2.0258
1879	MOB3A	1.83481	MAN1A1	2.70286	FAM162B	2.04734	OXSR1	2.43428	HS2ST1	2.41055	GRM1	2.02516
1880	PDLIM4	1.83303	MEST	2.7014	LRTM2	2.04646	ATCAY	2.43357	APOM	2.40973	EPC2	2.02466
1881	RGS13	1.83245	JMJD4	2.70121	COL23A1	2.04629	TMEM64	2.43175	BCL2A1	2.40924	PPP2R3A	2.02434
1882	GPR52	1.83195	RGL3	2.69983	PSMB6	2.04553	STX3	2.4309	SPARC	2.40854	SLC22A3	2.02333
1883	FAM184B	1.83195	NAA35	2.69613	PPP3CA	2.04405	GNAZ	2.43073	BTBD10	2.40739	AP2A1	2.02046
1884	FNDC3A	1.83027	VAT1L	2.69544	RBM18	2.04401	PPM1G	2.43059	CRYL1	2.40603	DNM1P35	2.01998
1885	XKR4	1.82963	SHISAL1	2.69467	ANKRD2	2.04281	TRABD	2.42876	EIF3H	2.40601	LOC341056	2.01926
1886	AP1S1	1.82933	TUSC2	2.69453	SMIM29	2.04049	SSTR2	2.42863	KBTBD6	2.40516	FAM19A1	2.01897
1887	LAMC2	1.82877	TBC1D13	2.69409	ZBBX	2.03942	JKAMP	2.42774	ENC1	2.40481	UQCC1	2.01881
1888	TPRG1L	1.82862	PDLIM4	2.69131	KPNA1	2.03905	CTDSPL	2.42747	ZNF845	2.40457	TMSB10	2.01879
1889	LPCAT2	1.82589	SF3B3	2.69105	UBL4A	2.03893	MEPCE	2.42731	CEP83	2.40365	TMX4	2.01868
1890	CYP11A1	1.82556	OGG1	2.69076	ATP2C1	2.03861	GABRA4	2.42341	IFT27	2.40329	PSMG3	2.01853
1891	TMEM170A	1.82432	HDLBP	2.69005	GON4L	2.03765	PIK3CD	2.41967	ZDHHC23	2.39909	GRSF1	2.01839
1892	LOC730183	1.82414	ATP9B	2.68708	CELSR2	2.03729	CSRNP1	2.41935	HPS4	2.39785	SNX16	2.01598
1893	B4GALT1	1.82375	CCDC191	2.68576	RPUSD4	2.035	DCAF10	2.41924	SLC1A6	2.39637	DNM1L	2.0131
1894	SAMD5	1.82333	TOMM7	2.68536	MPI	2.03488	SHISA9	2.41907	ANKDD1A	2.3962	RBBP6	2.01162
1895	ZSWIM9	1.82319	RREB1	2.68487	UBE2B	2.0338	FIGNL2	2.41753	TMEM47	2.39596	MBLAC2	2.01157
1896	MOXD1	1.82313	RPL19	2.68437	LMTK2	2.0335	BAIAP3	2.41732	MAP2	2.3953	ZFP69	2.01124
1897	FADS2	1.82262	TNFRSF10B	2.68402	FAM110C	2.03347	LSM14B	2.41712	ACVR2B	2.3933	KMT5A	2.01023
1898	CYP4X1	1.82126	TSPAN2	2.68263	C2orf74	2.03331	FAM241B	2.41679	IQCK	2.39324	ZNF554	2.00815
1899	RLIM	1.82091	SNAPIN	2.68247	AHR	2.03275	KIFC3	2.41662	ARF3	2.39249	SMAP2	2.00813
1900	PRR25	1.82032	CPLX3	2.6819	KRT14	2.03234	ATP5MC3	2.41548	ZNF418	2.39121	DENND1A	2.00764
1901	PRKAG2	1.81906	FAM102A	2.67958	SRD5A3	2.03207	PORCN	2.41533	GNAZ	2.38764	APRT	2.0068
1902	TNS3	1.81905	OPHN1	2.67924	ERFE	2.0319	UQCR10	2.41514	HDAC9	2.38626	MYT1L	2.00602
1903	SPATA32	1.81754	GPM6B	2.67794	RASIP1	2.03097	ERCC1	2.41436	ZNF184	2.38623	DNAJC16	2.00592
1904	C6orf48	1.81752	LINC01783	2.67723	DLGAP2	2.02919	KCNA4	2.41394	NPM3	2.38539	MB21D2	2.00518
1905	ASAP3	1.81734	MAPK1	2.67687	RAN	2.02824	NPRL2	2.41342	NUDT16L1	2.38434	WDR77	2.00471
1906	RBM43	1.8172	OR13A1	2.67672	NOVA1	2.02677	TEX30	2.4132	BSPRY	2.38351	PHYHIPL	2.00324
1907	SGSM2	1.81573	RMDN3	2.67567	NUP93	2.02652	ZNF57	2.41251	CFAP97	2.38348	EFNB3	2.00271
1908	TINCR	1.81401	SHC3	2.67521	ARHGAP26	2.02638	USB1	2.4116	TLL1	2.38275	VAT1	2.00131
1909	IVD	1.81215	BEX1	2.67516	MIR22HG	2.02489	RHBDD2	2.41085	VLDLR	2.38179	COL6A1	2.00099
1910	RPS15A	1.81177	RPL39L	2.67469	TMEM158	2.02463	DHX30	2.4103	UTP11	2.38159	ARNT2	1.99938
1911	LOC285097	1.81049	CDC42EP4	2.67427	PHF14	2.0224	SNRNP27	2.40838	MED14OS	2.38134	RPH3AL	1.9982
1912	LOC728715	1.81015	2008-03-01	2.67169	BLOC1S2	2.02216	FAP	2.40783	ANG	2.38104	UNC13B	1.9965
1913	FAM86C1	1.80835	RPL41	2.6715	RNF44	2.02208	PLA2G4C	2.40754	PDHA1	2.38102	NAP1L2	1.9958
1914	KCNMB1	1.80781	ROBO2	2.67103	PKIG	2.02202	MMS19	2.40725	ACVR2A	2.38099	CELSR2	1.99547
1915	UQCR10	1.80727	MRVI1	2.6696	NPRL2	2.02183	GPNMB	2.40596	CARHSP1	2.38077	STRAP	1.99547
1916	GSG1L	1.80562	SPG21	2.66756	SYNDIG1	2.02136	PREP	2.40588	ZFP69	2.38012	GSK3B	1.9952
1917	TMEM263	1.80514	B3GALNT1	2.66597	CLSTN2	2.0205	LOC105374952	2.40559	CRHBP	2.38009	PPM1A	1.99329
1918	GPR183	1.80478	COPZ2	2.66579	LIG4	2.01743	KCNS2	2.40522	LOC101927318	2.37993	PREPL	1.99319
1919	FAM212B	1.80475	SLC7A6OS	2.66564	ARL4A	2.01734	TSPAN5	2.40463	LOC644189	2.37927	MGAT4A	1.99117
1920	STUM	1.80467	RPL27A	2.66534	TP53I3	2.01644	MAN1B1	2.40361	GALNT11	2.37899	KRBOX4	1.9899
1921	IFI30	1.80388	INCA1	2.6653	SNX14	2.01582	CTXN1	2.40323	S100A13	2.37885	NIP7	1.9887
1922	CCDC91	1.80387	NCR2	2.66233	CITED4	2.01525	LINC00900	2.4013	RPL31P11	2.37817	SGSM3	1.98824
1923	ZNF449	1.80303	LRIG1	2.66139	LMO1	2.01461	CACYBP	2.40049	RTL10	2.37806	TMEM38A	1.98664
1924	ZFHX4-AS1	1.80285	CD74	2.66134	ABLIM2	2.0134	NHLRC1	2.40048	MOSPD2	2.37734	NRGN	1.98539
1925	C15orf61	1.80254	TP53I3	2.66038	PRRG3	2.01244	THOP1	2.40022	TMEM256	2.37649	PDHX	1.98533
1926	UG0898H09	1.80245	MAF	2.65944	RUVBL2	2.01109	GNPTAB	2.39854	RITA1	2.37453	ZBTB44	1.98493
1927	FANK1	1.80208	KCNIP1	2.65847	TMEM169	2.01101	LSM4	2.39506	FAM184A	2.3744	CFAP69	1.98325
1928	ZNF844	1.80117	RPN2	2.65829	SLC35F3	2.01061	ZGPAT	2.39206	SLC17A7	2.37289	RIC8A	1.98216
1929	DOC2B	1.80057	ARPC2	2.65712	FBXO22	2.01006	SIPA1L1	2.39004	FAM173B	2.37279	APBA2	1.98132
1930	STK16	1.80055	C1orf52	2.65692	EMC1	2.00917	S100A6	2.38889	TPD52L2	2.3704	NDRG4	1.98029
1931	TMEM159	1.79988	RPL7	2.65675	IFT57	2.00893	B9D1	2.38863	RILPL1	2.37	NSF	1.97976
1932	MAGED1	1.79923	DCTN3	2.65665	ARNT2	2.00834	SMC1A	2.38803	ZNF827	2.36925	ZNF26	1.97838
1933	MYL6B	1.79915	UHMK1	2.65609	SLC20A1	2.0083	LOC100288911	2.38638	COL12A1	2.36779	GPSM1	1.97734
1934	ARHGEF28	1.79755	BTN3A1	2.65582	GALNT11	2.00777	H2AFZ	2.3837	DNAJC7	2.36739	SLK	1.97733
1935	PJA1	1.79736	TLX1	2.65338	USF3	2.0075	LY6H	2.38363	NPHS1	2.36684	TUBB4A	1.97688
1936	TMPRSS6	1.7969	PIR	2.65328	HDC	2.00616	ATP5MD	2.38318	ARHGEF40	2.36543	C1orf74	1.97609
1937	CD163	1.79642	HEBP2	2.65257	INF2	2.00452	CLDN4	2.38065	OLFML3	2.36425	CEP170B	1.97395
1938	DNAAF5	1.79609	MTM1	2.65237	EPHA5	2.00108	CHEK2	2.38007	FOXJ3	2.36412	ZNF264	1.97389
1939	GNPTAB	1.79572	UQCRFS1	2.65165	NLE1	2.00026	FAHD2CP	2.37992	GPKOW	2.36191	COP1	1.97324
1940	BAX	1.79538	APC	2.65081	IPO5P1	2.00023	ENDOV	2.37835	TTC7B	2.36164	FAM169A	1.97273
1941	C2	1.79465	PLPPR4	2.65066	TMEM240	2.00007	HIVEP1	2.37734	ADAP2	2.36103	GRIK3	1.97227
1942	P2RY12	1.79463	HLA-DPA1	2.65063	NIT2	1.99917	DOCK9-AS2	2.37714	PTS	2.36046	DDX51	1.97209
1943	SLFN11	1.79397	FZD9	2.65012	TLX2	1.99835	EIF4A2	2.37662	TAPT1	2.36033	EID2B	1.97195
1944	NDOR1	1.79394	NACAP1	2.64794	SIRPG	1.99819	KCNS1	2.37633	SV2B	2.3563	TMEM106B	1.97159
1945	GMIP	1.79374	P2RX2	2.64722	LOC400684	1.99769	GGCX	2.37529	CHMP4B	2.35482	TMEM8A	1.97149
1946	PPP4R4	1.79359	STX12	2.64678	MAPK1	1.99745	CCNB1	2.3723	CPAMD8	2.35387	TRIQK	1.97131
1947	CCDC90B	1.79338	SIPA1	2.64538	ZRANB1	1.99639	NRGN	2.37089	RGL1	2.35373	DPYD	1.97125
1948	MAP3K10	1.79307	MSH3	2.64536	TMEM200A	1.99476	CERS4	2.36545	RAB15	2.35345	DUSP4	1.97036
1949	ZC3H7A	1.79225	IGBP1	2.64521	TBCB	1.99343	MAPK14	2.36443	DOK4	2.35342	PTRH2	1.97035
1950	CRYGD	1.7915	SERPINA6	2.6448	FOXRED1	1.99201	FMR1	2.36215	SPTSSA	2.35307	ZNF365	1.96885
1951	DNPEP	1.79059	CYP46A1	2.64436	TMEM106C	1.99068	CFL1P1	2.36037	SORBS2	2.35214	THNSL1	1.96825
1952	MRVI1	1.78944	SH3BP2	2.64339	DYNC1LI1	1.99037	HTR7P1	2.35931	CRLF3	2.35155	HBZ	1.96795
1953	WDR13	1.78943	KAT14	2.64263	CBFA2T3	1.98962	AHNAK2	2.35904	CUL2	2.34998	TMEM231	1.96772
1954	SPIDR	1.78941	LTA	2.64224	CPNE7	1.98856	VASN	2.35759	NRP2	2.3487	ADGRL3	1.96715
1955	COQ5	1.78894	TNFRSF13C	2.63961	KAT7	1.98787	PPP5C	2.35732	ZSCAN5A	2.34862	LINC00965	1.96626
1956	BMS1P20	1.78858	SBF2	2.63882	GGH	1.98751	GNA14	2.35632	FBXL18	2.34539	TCTA	1.96578
1957	UBE2H	1.78655	PTER	2.63831	PEX14	1.98474	NT5DC2	2.35441	SH3PXD2B	2.34475	JPH4	1.96567
1958	TNFRSF1A	1.78619	PGM2	2.63792	USP25	1.98433	GTF3C1	2.3537	DLEU1	2.34421	ANKRD6	1.96559
1959	UPK2	1.78554	C18orf12	2.63786	SLC5A12	1.98311	CLP1	2.35285	RYR1	2.34262	CCDC85A	1.96506
1960	FAM184A	1.78489	ASAP3	2.63736	DCAF11	1.98301	SHISAL1	2.35264	PPP1R26	2.34211	CLIC5	1.96445
1961	MAP2K1	1.784	GJA1	2.63666	TMEM184B	1.98288	KCNMB4	2.35109	ROBO3	2.3401	GNPNAT1	1.96404
1962	OR5L2	1.7833	SLC6A16	2.6366	TFDP2	1.98257	NRXN3	2.35092	NR4A3	2.33907	SMPX	1.96394
1963	BCL2A1	1.78306	ZFHX4-AS1	2.63457	SIRPB1	1.97913	MSX1	2.34817	FAM83H	2.33861	UBLCP1	1.96361
1964	ESD	1.78245	SIL1	2.63415	SORCS1	1.9789	GOT1	2.34744	SLC5A12	2.33738	BEX3	1.96203
1965	CCDC32	1.78243	MYT1	2.63346	PLEKHA5	1.97876	RFPL1	2.34735	PCMTD2	2.3349	RNF220	1.96111
1966	FEZF2	1.78126	SDS	2.63331	ZNF541	1.97862	AP2A2	2.34684	LOC389895	2.33391	MEIS3	1.9611
1967	SFXN5	1.78041	MSRA	2.63207	SAP30BP	1.97565	TEX47	2.34676	RGS14	2.33351	MAPK10	1.9604
1968	SNAP29	1.78	C9orf16	2.63193	POLR3A	1.97544	TUBB3	2.3456	ENSA	2.33349	NRG3	1.95917
1969	WIF1	1.77929	TATDN3	2.63132	ATF2	1.97541	DCAF11	2.34537	CDHR1	2.33102	PLK2	1.95896
1970	SUCO	1.77923	NUDT19	2.63073	SRP19	1.97514	FLRT2	2.34513	ACAA2	2.32919	RNF41	1.95895
1971	SRP72	1.779	EMX2	2.63029	SKIV2L	1.9751	GABRG2	2.34436	RHEBL1	2.32781	EML6	1.95838
1972	FAM219B	1.7788	ME3	2.63005	GDE1	1.97474	LYNX1	2.34383	SRRD	2.32461	CELSR3	1.95787
1973	NDUFAF2	1.77654	HNRNPC	2.62914	KLHDC9	1.97468	GUCY1B1	2.34174	GABRE	2.32449	CTNND2	1.95711
1974	NT5E	1.77605	ELMO2	2.62881	MICAL2	1.97455	SUSD1	2.34143	GSTM1	2.32406	PPP3CA	1.95667
1975	KIAA1211	1.77585	C2CD4A	2.62766	PLEKHA2	1.97416	SLU7	2.3403	CHRNB1	2.32401	USP5	1.95656
1976	GRIN2B	1.77493	ARMCX2	2.62681	ALAS1	1.97392	CHAF1B	2.3402	DENND1C	2.323	NPM3	1.95629
1977	SURF1	1.77479	FAM136A	2.62661	CAMKV	1.97359	WDR17	2.33919	TBL1XR1	2.32289	SIAH1	1.95523
1978	RSPH9	1.77473	DHRS2	2.62628	TCF20	1.97265	RABAC1	2.33776	UQCC1	2.32173	CACNB3	1.95519
1979	DUSP8	1.77425	LRP3	2.62427	EPDR1	1.97246	PTPRO	2.33768	ABHD2	2.32104	COG1	1.95509
1980	LAMTOR2	1.77364	MPDZ	2.62331	ADGRB1	1.97209	CCAR2	2.33735	ATP6V0C	2.32099	SLC26A4	1.95482
1981	CIC	1.77329	CENPS	2.62309	DHPS	1.97171	PRSS23	2.33664	EXOSC7	2.32009	SACM1L	1.95373
1982	ZNF667	1.76969	C1QL3	2.62082	RAB7B	1.9714	EPHB6	2.33659	SCAPER	2.31994	MGAT5B	1.95218
1983	SOWAHD	1.76923	LRRN1	2.62063	HES4	1.97139	ZNF697	2.33305	CNTN3	2.31919	MAST1	1.95172
1984	ANKRD18A	1.76781	SLC29A4	2.62018	TERF2	1.97063	UBE2D3	2.3297	UBE2K	2.31824	SH3GL3	1.94942
1985	NLGN3	1.76704	SLC25A1	2.6196	MTHFD1L	1.96973	HPCAL1	2.32958	CARMIL3	2.31553	SDK2	1.9486
1986	B3GNT5	1.76669	AIFM2	2.618	CMIP	1.96973	SEC61A2	2.32958	ANKRD30BP2	2.31549	RAB39A	1.9479
1987	CAAP1	1.76465	SCRG1	2.61741	PPARG	1.96966	ZNF48	2.32955	S100Z	2.31513	CEP72	1.94781
1988	VLDLR-AS1	1.76441	EFCAB11	2.6168	PTCHD1	1.96944	C2orf69	2.32948	WDFY1	2.31286	PRSS23	1.94775
1989	SFPQ	1.7644	LINC00260	2.61597	NUDT2	1.9692	NPHS1	2.32876	UBE2MP1	2.3114	PANK4	1.94746
1990	IGFBPL1	1.76411	DBNL	2.61468	NCAPH2	1.96918	LINC02217	2.32843	PDCD2L	2.31122	MAFG	1.94653
1991	C1orf123	1.76392	HSPB1	2.61394	RFPL3	1.96873	BANP	2.32763	AXL	2.31068	CTXN2	1.94619
1992	PEAK1	1.76348	GRB14	2.61367	MFSD4B	1.96872	GSTO1	2.3257	PFN2	2.30797	IFNGR2	1.94359
1993	FAM71F1	1.76307	COLCA1	2.61253	IFNGR2	1.96779	WDR48	2.32443	CADM1	2.30716	HSPA13	1.94355
1994	LRRN2	1.7628	PAK3	2.61248	LIN7B	1.96735	ABCF2	2.32428	SGSM1	2.30704	FLCN	1.94302
1995	PPP6R1	1.76173	USP39	2.61138	RTKN2	1.96659	GPR68	2.3239	CDC34	2.30613	NSD2	1.94216
1996	GFRA1	1.76159	PIGP	2.61099	FAM71F1	1.96642	NLE1	2.3227	PPP3R1	2.30437	ATL2	1.94141
1997	CRELD2	1.7599	TYMP	2.61002	MAGI2	1.96632	DRD4	2.32174	DRAIC	2.30415	RAB3D	1.94081
1998	HIGD1A	1.75971	ST8SIA2	2.60982	ID2	1.96623	PLXNA2	2.31964	AGFG2	2.30408	LINC02361	1.9401
[truncated: 10,669 more rows]

## Sheet: PLS-ranked genes_MEG
	Delta		Theta		Alpha		Beta		Low gamma		High gamma
0	MCUR1	10.0209	SHISAL1	7.04693	ATP13A3	9.19073	SMIM12	6.70919	PRDX4	7.74322	PRDX4	8.62699
1	NADK2	9.93954	MCUR1	7.0213	TMEM145	9.0453	RANBP2	6.44466	TNIK	7.47121	SMIM4	8.36888
2	NKAIN3	9.87348	C1orf50	6.99376	LYSMD4	8.96664	ADORA1	6.395	SMIM4	7.32438	AQP4	8.08302
3	C1orf50	9.76769	ZNF226	6.99361	FNDC5	8.61513	BCAS3	6.39163	SUSD3	7.23832	RAB32	8.04227
4	PRDX4	9.65493	RBP4	6.82301	KCNAB3	8.50383	IQSEC1	6.27898	TSEN34	7.21274	RPS10	8.03565
5	SMIM4	9.44441	PRDX4	6.80066	PIM1	8.49383	HARS	6.26768	MCUR1	7.19732	NKAIN3	8.00559
6	MGST1	9.39225	TMEFF2	6.78995	TTC39B	8.42428	PITPNA	6.24769	RAB32	7.16968	C1orf50	7.95395
7	C6orf52	9.18065	ZFP64	6.70992	DCBLD2	8.39425	FITM2	6.24761	LRRC42	7.16348	TNIK	7.73364
8	TIMM8B	9.15864	NKAIN2	6.65224	SETBP1	8.33508	FLII	6.24052	ETFB	7.14042	PIGF	7.71887
9	SH3RF1	9.15834	TIMM8B	6.52574	CACNB4	8.22215	SLC25A3	6.22905	MGST1	7.11216	UG0898H09	7.63114
10	EFEMP1	9.08214	SELENOW	6.50472	BAAT	8.21942	KCNJ8	6.20969	C6orf52	7.098	EFEMP1	7.62199
11	UG0898H09	8.9827	RBM8A	6.50359	IFNLR1	8.17881	MTX3	6.20167	NKAIN2	7.07467	MT2A	7.61083
12	MT2A	8.90543	B3GALT6	6.49925	ATXN7L2	8.16599	STAR	6.19936	ROBO1	7.03897	C6orf52	7.5595
13	IL33	8.86898	GTPBP4	6.47398	DENND1B	8.14637	MDH1	6.19506	VAV1	7.02853	ARHGAP45	7.53084
14	SHISA5	8.80989	GMFB	6.46117	TRPC3	8.13235	GMPR2	6.10987	SSTR1	7.01543	ALOX5	7.52481
15	CHMP4A	8.76536	WDR86	6.45948	CCL27	8.12495	ESYT1	6.09911	AQP4	6.99316	CD33	7.52333
16	LOC101927752	8.76014	TMSB4X	6.45065	NKX6-3	8.09965	GCLM	6.07739	UG0898H09	6.96245	CNN3	7.49177
17	KCNK2	8.666	FAM120AOS	6.37582	RASD2	8.07977	ATG5	6.06989	ASCL2	6.96057	RGS10	7.49054
18	TNIK	8.57621	XYLT1	6.36316	ABCC8	8.05914	DNM3	6.06431	TNFAIP8L2	6.95559	P2RY13	7.4877
19	CNN3	8.56058	CALML3	6.35972	CORO6	8.04871	MIR22HG	6.05845	GTPBP4	6.92345	SUSD3	7.48676
20	ARHGAP45	8.52324	DNAJC2	6.3374	DPY19L2	8.02586	DPY19L1	6.04311	FAM228B	6.91774	ROBO1	7.41906
21	TSEN34	8.5043	C2CD4C	6.29477	SLC16A7	7.95378	FIBP	6.02725	C1orf50	6.83779	NKAIN4	7.4119
22	LRRC42	8.49986	MAFG	6.28357	SFI1	7.94624	NEFL	6.02385	NKAIN3	6.82259	KCNQ1	7.38275
23	AQP4	8.44632	KCNMB4	6.26757	INTS4P1	7.94044	TUBG1	6.01443	RPS10	6.79666	MGST1	7.37756
24	ZNF226	8.39232	EFCAB1	6.25337	PLA2R1	7.93214	AP1B1	6.01245	ARHGAP33	6.79121	TSEN34	7.34206
25	SUSD3	8.38925	CYB5D2	6.25328	ABCA6	7.92259	CCDC25	5.99645	DPYSL3	6.74258	LOH12CR2	7.33793
26	LOH12CR2	8.37543	SHISA5	6.23833	DTX3	7.87876	IFT57	5.96352	CXorf57	6.73128	MCUR1	7.31512
27	FADS2	8.3709	C1orf122	6.22926	GPR161	7.86443	OAT	5.95412	P2RY13	6.70891	PEX10	7.30821
28	GMFG	8.36846	STX4	6.20191	ANK1	7.84545	HS3ST2	5.95128	CX3CR1	6.70344	PCED1B	7.26641
29	WFS1	8.32427	MYDGF	6.19451	ZADH2	7.82577	SRPRA	5.93703	PIGF	6.68408	TNFAIP8L2	7.26366
30	RAB32	8.30945	GAR1	6.17246	PPP2R5D	7.7969	DNAJA3	5.91763	METTL6	6.6817	WDFY4	7.23133
31	RNASET2	8.2616	TIMM10	6.17101	MCF2L	7.79504	COPA	5.89572	RGS10	6.67221	ADAP2	7.19855
32	WDFY4	8.23234	GDA	6.15531	ERP44	7.78838	CIDEA	5.88064	MT2A	6.65035	PDGFRA	7.17927
33	ARHGAP5-AS1	8.23099	FAM228B	6.14005	EPB41	7.78047	LRRC20	5.88038	EFCAB1	6.64545	EIF1	7.16232
34	MT1M	8.18871	FXYD6	6.09978	DPY19L2P1	7.76973	ALAS1	5.87098	PYCR1	6.64534	KXD1	7.16033
35	ALOX5	8.17979	DYNLL1	6.07731	STAG3L4	7.75407	VPS16	5.85844	HNRNPC	6.64506	PSME1	7.15761
36	GGTA1P	8.17717	SARNP	6.05385	SYNE4	7.74492	CDC37	5.8541	NADK2	6.63158	FAM228B	7.13037
37	RPS10	8.17385	KLK10	6.04025	CCNI2	7.71157	CHEK2	5.83566	ARHGAP45	6.60615	DDAH2	7.13034
38	ROBO1	8.11926	COG5	6.0378	P3H3	7.69033	ATXN7L3	5.82954	B3GALT6	6.60196	KCNN3	7.12443
39	SOX9-AS1	8.07488	IFT22	6.01537	TTC39C	7.65827	CDIP1	5.81712	LOC101927974	6.57254	SOX9	7.09357
40	EDNRB	8.04281	HSBP1	5.99366	LOC100506124	7.65542	AARS	5.81697	C2CD4C	6.57174	SWI5	7.07839
41	PLB1	8.01342	GMFG	5.98333	ZYX	7.65479	RMND1	5.81332	EIF1	6.56803	PYCR1	7.0746
42	GLI3	8.01075	BAIAP3	5.98184	FAM110A	7.64446	RANGAP1	5.81197	CD33	6.56746	CCDC167	7.06143
43	UBA52	8.00899	METTL6	5.97489	JDP2	7.63884	METTL13	5.78944	CNN3	6.55978	TIMM8B	7.0267
44	HSBP1	8.00811	PDGFC	5.9677	SLC5A6	7.61199	LINC01963	5.7819	KCNQ1	6.53277	LINC00260	7.00742
45	HACD4	8.00552	EIF1	5.96655	AMMECR1	7.60244	PICK1	5.78156	ITGB2	6.52149	PON2	7.00648
46	KCNQ1	7.9505	VPS29	5.95142	RMC1	7.58134	DDX1	5.76713	TIMM8B	6.51838	NADK2	6.9891
47	UCHL3	7.92487	RER1	5.94578	TSC22D1	7.56212	RETREG2	5.75995	FTL	6.51631	AIF1	6.94215
48	RER1	7.89921	NKD2	5.93165	ZSWIM4	7.54964	ENPP5	5.75157	TMEFF2	6.49154	TBXA2R	6.94133
49	DDAH2	7.88874	FTH1	5.91513	ZFYVE28	7.52792	GNA14	5.74001	RPS27A	6.48983	MR1	6.92128
50	ZC3HAV1	7.88164	EMC7	5.91325	EXTL2	7.52658	DCTN2	5.70522	FTH1	6.47654	RPL12	6.91929
51	ETNPPL	7.8719	TMEM208	5.90725	LINC01637	7.52509	ENPP6	5.70387	CHMP4A	6.47466	HADH	6.90575
52	SLC25A23	7.86126	CRIP2	5.90158	RPGR	7.51935	C12orf49	5.70135	EFEMP1	6.47089	LCP1	6.86541
53	RANBP3L	7.84169	CNR1	5.90083	PPP3CC	7.50263	C2CD2	5.69342	C1orf122	6.45925	TP53TG1	6.86466
54	TMEM176B	7.82348	KIF2A	5.89236	LPCAT4	7.49456	REPS2	5.65755	GINS2	6.42315	IDH2	6.85904
55	UMPS	7.81936	LOC101927420	5.88392	HSF4	7.46271	NAP1L1	5.65701	KIF2A	6.40768	MT1A	6.85443
56	PSME1	7.81805	SLIT1	5.88071	FMN2	7.42197	TBRG4	5.63741	TMEM208	6.37937	LRRC42	6.85201
57	CD33	7.81247	ENO1	5.86141	LAG3	7.41828	NDUFAF4	5.63657	TRAPPC2L	6.35928	LYN	6.83017
58	FTL	7.78243	CHMP4A	5.85709	SLC6A6	7.41467	E2F1	5.63182	CDC42	6.35822	MT1JP	6.81581
59	EIF1	7.77285	CKS1B	5.8357	HLTF	7.40713	AQP11	5.63119	CKS1B	6.35697	ITGB7	6.8112
60	DKFZp779M0652	7.7666	NSFL1C	5.83087	ZBTB1	7.40291	TMX4	5.62914	SH3RF1	6.35098	TMEM208	6.79976
61	LINC02482	7.76389	FAM229B	5.8235	CCDC177	7.39774	USP19	5.62576	ADD3	6.34836	ETFB	6.78549
62	RNASE6	7.75187	SMIM29	5.80472	CNST	7.38151	ZNF607	5.62201	KCNMB4	6.34337	CKS1B	6.78309
63	TMEM136	7.74067	FAM200B	5.80386	SLC9A5	7.3775	LINC00680	5.62107	RBM8A	6.34316	CCR1	6.77726
64	PHPT1	7.72885	IL17D	5.79497	STARD5	7.37723	NDRG4	5.61962	SHISA5	6.3175	CD63	6.77136
65	ETFB	7.72873	PLPPR3	5.7919	JAKMIP2	7.36874	KREMEN2	5.61519	CLDND2	6.28942	MT3	6.76949
66	C1orf122	7.70079	GNB4	5.78576	RAB40AL	7.33489	MLYCD	5.61446	NKAIN4	6.28858	ZC3HAV1	6.76888
67	PEX10	7.67605	GRIN3A	5.77444	TRIM52	7.31863	PEX14	5.61335	ELMO2	6.26552	VAV1	6.76478
68	ADGRG1	7.67143	ZNF350	5.76735	PLEKHH3	7.30795	PNMA6A	5.61058	CFD	6.26315	RNF181	6.75827
69	ADGRA3	7.67141	WNT10B	5.74361	OVGP1	7.28974	SLC35C2	5.60577	PCED1B	6.24569	NKAIN2	6.75715
70	ADAP2	7.67074	RAB32	5.73605	IDE	7.28322	KITLG	5.60344	PTPRF	6.23357	HCST	6.74738
71	PDGFRA	7.64835	C1S	5.72591	NSMAF	7.27697	GUCY1A2	5.59603	MARCKS	6.22587	MT1L	6.74248
72	ARHGEF40	7.63631	PSMB7	5.72366	ICA1	7.26036	ATP5MC3	5.59417	ALOX5	6.22454	ARHGEF40	6.73932
73	P2RY13	7.63292	CHCHD6	5.71182	PRO1804	7.25902	LOC101927278	5.58359	LY6H	6.20728	GPR34	6.73846
74	MAPK3	7.63095	CCT5	5.70788	PCP4L1	7.2513	YRDC	5.56888	RNF181	6.20156	GTPBP4	6.7348
75	PYCR1	7.62929	SMIM10L2A	5.70682	INTS8	7.25122	ARL4D	5.55619	PLS3	6.1934	FTL	6.73325
76	RGS10	7.62182	NDUFAF8	5.70551	XKR6	7.23799	LOC108783654	5.55618	PHPT1	6.18841	B3GALT6	6.71282
77	IFI27L2	7.60236	PSMB1	5.70483	VIPR2	7.23634	ATP5F1A	5.55606	LCP1	6.18767	LAMA1	6.70304
78	KCNN3	7.59436	PIPSL	5.69773	DSCAM	7.23075	LONP1	5.55127	SOX9	6.17026	METTL6	6.69555
79	PYGL	7.58845	POLE4	5.69585	LRRC55	7.22686	AKR1A1	5.55047	RPL12	6.16388	RPL36	6.69228
80	FAM228B	7.57518	DPYSL3	5.69333	ST3GAL6-AS1	7.22558	LOC100128239	5.53261	ARHGDIB	6.14235	EDNRB	6.68371
81	VAV1	7.56956	SMIM10L2B	5.6863	MAP3K6	7.20559	RABEPK	5.5309	CHID1	6.142	MLC1	6.6726
82	FAM107A	7.55162	PEX19	5.68552	SMC2	7.19045	CDH6	5.52991	IL33	6.13929	ADGRG1	6.66117
83	PAX6	7.53264	TFPT	5.68363	C4orf33	7.18706	RNF111	5.52847	RNASE6	6.13645	ARHGAP33	6.64653
84	BIRC3	7.51211	TMEM230	5.67952	FAM43A	7.17909	SCAMP3	5.51581	HIST1H2BK	6.13244	ITGB2	6.64334
85	PON2	7.50307	PCBD1	5.67227	MASP2	7.17599	POPDC3	5.51513	ZC3HAV1	6.12117	RHBDF2	6.64321
86	SWI5	7.50261	FRA10AC1	5.66929	NR3C2	7.17586	GOT2	5.51339	PEX10	6.11834	P2RY12	6.6379
87	TMEM128	7.47599	MZT2A	5.66896	ENTPD4	7.17319	STK24	5.50046	HCST	6.11651	RER1	6.62161
88	NKAIN4	7.45702	CHID1	5.6674	EEPD1	7.15599	TUBGCP4	5.49049	AIF1	6.11117	TLR2	6.62042
89	S100A16	7.45347	C20orf27	5.66048	LRRK2	7.14425	TIMM22	5.48167	C1QB	6.10995	S100A13	6.61823
90	CD63	7.44534	TXN	5.65863	NT5M	7.1304	DTX4	5.4764	ATP2B4	6.10909	CLDND2	6.61305
91	LINC00260	7.43797	HRH1	5.65247	SLC12A8	7.12794	METTL21A	5.47386	GDE1	6.088	ZFP36L1	6.61207
92	PIGF	7.4354	PTPRF	5.64967	MEF2A	7.12142	FXR2	5.47226	SMIM27	6.08018	CHMP4A	6.5963
93	SYT17	7.43155	CHRDL1	5.6475	CCR10	7.11148	PWARSN	5.46917	SMIM29	6.07461	RBM8A	6.5837
94	SELENBP1	7.43104	AZIN1-AS1	5.64545	SLC45A1	7.09029	RABGGTA	5.46808	TP53TG1	6.063	POLR2G	6.58167
95	LRRC3B	7.4269	MCUB	5.64194	JADE1	7.05415	DOHH	5.45864	UBA52	6.06267	MT1E	6.57226
96	RSU1	7.41882	LDHD	5.64063	THG1L	7.04768	EHD3	5.45452	TRAPPC6A	6.05784	CX3CR1	6.56562
97	GABRB1	7.40774	TRAPPC6A	5.63499	LRRC49	7.03239	EIF2B5	5.45407	POLR2G	6.0493	LINC01736	6.55875
98	GTPBP4	7.40196	RTL8A	5.62632	GLCCI1	7.02208	SRP68	5.45191	KIRREL2	6.0453	RPS27A	6.55779
99	KIRREL2	7.39755	DDAH1	5.62212	CEACAM19	7.02074	CTSL	5.44595	ZNF226	6.04514	SH3RF1	6.54483
100	THRA	7.3914	LINC01140	5.61953	NOP2	6.99869	KLHDC3	5.44533	KCNN3	6.03711	APBB1IP	6.53954
101	BCHE	7.38686	CETN2	5.61949	ESRRG	6.9973	CCNDBP1	5.44489	DDAH2	6.03663	FADS2	6.51809
102	RBM8A	7.38208	ANAPC11	5.61876	MC1R	6.99604	MCOLN1	5.44233	RER1	6.01955	IL33	6.51492
103	MMAB	7.3788	TCEA3	5.60545	MYO19	6.98306	LCP2	5.43882	MESP1	6.0153	DPYSL3	6.50995
104	TP53TG1	7.37848	ZSWIM7	5.60408	MIR29B2CHG	6.97769	LGALS1	5.43872	HACD1	6.01473	SSTR1	6.49671
105	SSTR1	7.37773	CD63	5.60066	SYCP2	6.95967	TRPC4AP	5.43564	SUMF1	6.00632	EZR	6.48929
106	SOX9	7.37426	RASGEF1C	5.59821	ATG16L1	6.94943	SAMM50	5.43129	PSME1	5.99934	DOK1	6.48768
107	LCP1	7.36288	SMIM4	5.59609	TTC21B	6.9485	TPBG	5.43076	LYN	5.99893	CAPG	6.48428
108	HTR1A	7.359	POLR2G	5.59521	GHRLOS	6.93382	ZNF25	5.42922	CD63	5.99631	C1QB	6.47789
109	RAET1E-AS1	7.35755	DHRS4	5.58432	GPCPD1	6.9247	TEX29	5.42825	RPL36	5.9962	GLI3	6.46934
110	RHBDF2	7.3393	SUMF1	5.56466	ATP5MPL	6.90946	CIAPIN1	5.42215	ITGAM	5.99141	FYB1	6.46591
111	MAFG	7.33672	AP3S1	5.56432	OR2AK2	6.90599	C9orf24	5.4203	CCR1	5.9876	EMG1	6.45859
112	TXN	7.33564	PIGF	5.56394	CTSC	6.90185	NDEL1	5.4157	PDGFRA	5.98638	TMEM128	6.437
113	MT1L	7.32825	RCHY1	5.55636	STS	6.84443	FAIM2	5.41461	VPS37C	5.9799	MT1X	6.42864
114	MT1JP	7.32327	SYT17	5.55372	MORC2-AS1	6.83908	ANO5	5.41175	MR1	5.97767	ANK3	6.42745
115	NIT2	7.31626	DOK6	5.54614	TARDBP	6.83432	STK39	5.39864	IL17D	5.9715	RPS2	6.42609
116	WIZ	7.29762	PEX10	5.54303	VWC2	6.8255	KIFAP3	5.39459	HSD17B6	5.96814	TBC1D13	6.41917
117	PCED1B	7.29144	RTL8C	5.53481	SCX	6.82006	ADPRHL1	5.39431	WDFY4	5.95403	PLPP3	6.41849
118	FTH1	7.28314	GUK1	5.53407	THSD4	6.81061	ANKRD2	5.38382	BAIAP3	5.95076	FTH1	6.41533
119	UNC5B-AS1	7.28006	RPL41	5.52465	SLC35G5	6.80882	ENO2	5.38115	DAD1	5.94895	PRDX1	6.41359
120	OST4	7.27411	PCED1B	5.52096	SLC19A2	6.80498	IFITM10	5.36846	MT3	5.94321	TTYH1	6.41111
121	ITGAM	7.27375	UBXN8	5.5158	YTHDC1	6.80472	UGP2	5.36831	ZSCAN18	5.93677	CDC42	6.40706
122	DPYSL3	7.27344	B4GALT2	5.50928	KBTBD2	6.80394	THEMIS	5.36493	TMSB10	5.93438	SMIM27	6.40581
123	GDPD2	7.26849	NTSR1	5.50453	TNRC6A	6.80356	APBB1	5.36347	FOLR2	5.93211	DHRS9	6.39984
124	TBC1D13	7.25942	MTCH1	5.50442	STPG1	6.79582	NCBP2-AS2	5.36179	FXYD6	5.93097	PLTP	6.39095
125	PRDX1	7.25707	LOC440934	5.50247	SLC44A5	6.79555	TFIP11	5.35539	RASAL1	5.93054	C1orf122	6.37852
126	KXD1	7.24251	TBC1D13	5.50054	GPR61	6.79171	PRKCQ-AS1	5.35512	IDH2	5.92949	VPS37C	6.37554
127	GUK1	7.23596	ENOX1	5.49814	TRERF1	6.79088	KATNAL2	5.3481	ETFDH	5.92915	APOE	6.36208
128	LDHD	7.23454	TUBB8P12	5.49778	NCOA3	6.77855	HEXB	5.33955	WDR86	5.92608	CETN3	6.35435
129	EMC7	7.22694	UHMK1	5.49309	MAP1LC3B	6.75631	PDLIM7	5.3297	C8orf46	5.92586	GINS2	6.35372
130	ACOX2	7.2227	PRDX1	5.46752	MRS2	6.73943	FARSA	5.32419	PRDX1	5.92257	POLR2I	6.34902
131	HLA-DMB	7.21851	S100A13	5.46688	HS3ST1	6.73424	CLEC2L	5.32404	SWI5	5.92245	CD68	6.34416
132	ARFGEF3	7.21079	RPS10	5.46654	CHD2	6.73167	GLRX2	5.32393	LAMA1	5.91982	ADGRA3	6.33721
133	TMSB4X	7.21073	ME1	5.46042	SLC25A36	6.72176	ANXA3	5.32334	SIL1	5.91885	RPS20	6.33142
134	CMTM7	7.21071	TYW5	5.45581	SLITRK3	6.71822	BCKDHA	5.32099	ADAP2	5.91709	ITGAM	6.33141
135	MRAS	7.20199	C1QL3	5.43853	RNLS	6.71717	MREG	5.31751	CCDC167	5.91508	TRAF3IP3	6.32388
136	HIST1H2BK	7.1879	STUM	5.43397	TLE2	6.71385	MRPL4	5.31508	PON2	5.90235	ETFDH	6.31797
137	APBB1IP	7.18781	IDH2	5.41653	SPTSSB	6.701	PGK1	5.31485	LINC01736	5.89959	PTPRF	6.31607
138	AZIN1-AS1	7.18368	BAALC	5.41032	KCNT1	6.69722	KCNQ5	5.31229	POLR2L	5.89326	SHISA5	6.31552
139	TMSB10	7.1802	CDC16	5.395	MTBP	6.69614	ADRA1D	5.31171	ACAA2	5.89039	RNASEH2C	6.31201
140	PRSS35	7.17681	CDC27	5.38967	KNDC1	6.6906	DNAJC27	5.31109	C1S	5.88845	ARHGAP4	6.31025
141	MLC1	7.17443	TMEM159	5.3728	CHRD	6.68958	MTMR2	5.2932	GPR34	5.88819	SLC39A12	6.31022
142	TNFAIP8L2	7.14734	C8orf46	5.37215	LINC00515	6.68566	KBTBD11	5.29306	LAPTM5	5.8876	C3	6.29932
143	RAPGEF4	7.14476	KLK7	5.35443	TFAM	6.68117	ACE	5.27958	S100A13	5.88584	C1QA	6.29826
144	KCTD12	7.14358	GPRIN2	5.34058	GAS2	6.68011	SNX17	5.27711	FUT10	5.87367	C1QC	6.29227
145	MR1	7.14049	DHRS9	5.33706	PDIA5	6.67369	WDR45	5.27222	AZIN1-AS1	5.8654	AZIN1-AS1	6.28991
146	ETFDH	7.13984	ADRA1B	5.33289	NARS	6.67235	SLC25A24	5.26955	TRIP12	5.86435	TRAPPC6A	6.28956
147	CTNND2	7.13333	NUDT10	5.32948	SCRT1	6.65472	CHCHD4	5.26715	HADH	5.86377	ASCL2	6.27606
148	RPL12	7.12509	DAD1	5.31723	HYLS1	6.65107	GSTO1	5.26699	C3	5.85851	PAX6	6.26932
149	B3GALT6	7.12495	FADS3	5.31435	RGPD3	6.64864	PHF23	5.26393	GGTA1P	5.8572	PTN	6.2595
150	CETN3	7.11212	TXNL4A	5.29714	KCNC3	6.64662	FOXRED1	5.26371	ENOX1	5.85275	TBC1D14	6.24296
151	MT1A	7.10696	BRK1	5.29651	TRMT61B	6.6436	KAT5	5.25998	RAET1E-AS1	5.84605	ITGAX	6.24268
152	AIF1	7.10601	CCNH	5.29167	TMEM86B	6.64301	VPS13D	5.25851	SLC7A6OS	5.84389	ATP5ME	6.24259
153	ASCL2	7.10599	NAGK	5.28594	SCN1A	6.64108	ELP3	5.255	P2RY12	5.84284	ADRB2	6.23979
154	RAP2B	7.10435	PRDM16	5.28514	DIS3	6.63731	STEAP2	5.24386	ITGB7	5.83674	PSMB1	6.23905
155	LYN	7.09568	ARHGAP45	5.28251	CCDC186	6.63631	CPNE1	5.24226	EFNB3	5.83297	FOLR2	6.23776
156	TIMP2	7.09543	LOC101927974	5.27982	ZNF180	6.63044	OXSR1	5.23111	LYPD8	5.83151	PHPT1	6.233
157	FGF2	7.09188	CX3CR1	5.27783	POU6F1	6.63023	DNAJC18	5.22776	TLR1	5.83117	ZNF226	6.23004
158	S100A13	7.09126	UBA52	5.27091	CEP152	6.62752	FASTKD5	5.22699	HACD4	5.83115	TYROBP	6.22963
159	ACOT2	7.07149	SLC26A4-AS1	5.26896	THAP10	6.62565	COPS7A	5.22561	POLR2I	5.82995	TMEFF2	6.2124
160	CCR1	7.06417	ACAA2	5.26591	CDADC1	6.61831	IMMT	5.22513	SHISAL1	5.82313	NACC1	6.20862
161	LYPLAL1	7.06272	ETFB	5.2622	PIK3CA	6.61667	EIF4E2	5.2236	PSORS1C1	5.82132	TRAPPC2L	6.20692
162	ZCCHC17	7.0611	SSTR1	5.26123	SPTB	6.60996	OLFM4	5.21798	ALOX5AP	5.82099	MT1B	6.20342
163	GINS2	7.05566	SULF2	5.25743	FSTL1	6.60683	MAP2K4	5.21758	ANKRD6	5.81806	LOC440434	6.19621
164	LSM3	7.04706	GNB2	5.25713	CLEC16A	6.60315	SLC35F1	5.21679	RAP2B	5.8157	CXorf57	6.19299
165	PDGFC	7.04624	GGCT	5.249	KALRN	6.60107	TNNT2	5.20678	EDNRB	5.81154	ALOX5AP	6.18996
166	HCST	7.04192	WTIP	5.24844	NDRG3	6.5986	PSMD12	5.20541	TBC1D13	5.79579	RPL35	6.18967
167	GPT2	7.04093	POLR2I	5.24627	PECR	6.59785	KCNC2	5.20329	TMEM230	5.79493	MYL5	6.18359
168	FAM120AOS	7.03491	ARHGEF28	5.2444	GABPB1-IT1	6.59681	CTSD	5.19458	PSMB1	5.79398	LYPD8	6.183
169	XYLT1	7.0291	UBE2D2	5.24248	PHYH	6.59427	CTSA	5.19402	PAAF1	5.79132	PLS3	6.18044
170	LINC00982	7.01961	MRPS16	5.24029	MINDY3	6.59301	AHSA1	5.1888	IFI27L2	5.78469	CFD	6.17863
171	LYRM2	7.01597	PUSL1	5.23822	ZSCAN9	6.58612	FBXO28	5.17869	RNASET2	5.76211	KCNK2	6.17694
172	LOC285097	7.00991	LOC100288911	5.23092	RALGAPA1	6.58253	GUCA1B	5.17575	RIT1	5.75689	TMEM256	6.17578
173	VPS37C	6.98632	GINS2	5.22957	GART	6.58117	ARL8B	5.17114	LOC101927752	5.75385	LOC101927974	6.17295
174	IL17D	6.9813	CHMP2A	5.22479	AMH	6.5739	CDIPT	5.16903	EMG1	5.75304	PRDM16	6.17246
175	EZR	6.98014	HACD1	5.21665	BHLHE40	6.57337	PEBP4	5.16803	DHRS9	5.74853	DAD1	6.17159
176	HSD17B6	6.97629	MRAS	5.21275	FGF9	6.56942	TIMM44	5.15514	LSM3	5.74533	GGTA1P	6.16625
177	NKAIN2	6.97054	THNSL2	5.19462	NEIL1	6.5489	DENND2D	5.15476	CRIP2	5.74287	HACD4	6.15862
178	ERICH6-AS1	6.96558	PRMT2	5.19461	SGIP1	6.5461	FSD1	5.15402	HSDL2	5.73866	HNRNPC	6.151
179	FZD1	6.95855	NOV	5.18834	PCNX2	6.54357	VCL	5.15224	HLA-DMB	5.73763	SUMF1	6.14434
180	ARHGAP33	6.94653	SQLE	5.18711	DNAJC5G	6.54021	PGD	5.14547	KLK10	5.73674	SELENBP1	6.12777
181	CDC42P3	6.94602	MRPL37	5.18553	LINC01137	6.53503	ARHGAP25	5.14389	TMEM128	5.73424	IFI27L2	6.11271
182	HACD1	6.93843	SIL1	5.18537	ATP2B2	6.53231	GLT1D1	5.14326	DHX58	5.72146	POLR2L	6.11019
183	TBXA2R	6.93744	OPRM1	5.18498	MAP3K13	6.52959	PABPC1L2A	5.14283	KXD1	5.72108	EMC7	6.10763
184	OGG1	6.92688	TUBB2A	5.18313	PIK3CB	6.52801	MPG	5.1399	THNSL2	5.71992	MT1M	6.10498
185	TBC1D14	6.92662	LY6H	5.17497	STARD10	6.52517	NLN	5.13642	PRSS35	5.71892	WFS1	6.10286
186	LINC01736	6.92464	FAM110C	5.17437	SLC4A9	6.50921	PRMT5	5.13546	CCDC90B	5.712	KIF2A	6.09299
187	RPS2	6.91759	UFC1	5.17007	FAM214A	6.50711	MIGA1	5.13175	EMC7	5.70765	RNASE6	6.0878
188	CAPG	6.91196	CYB5R1	5.16921	TCTEX1D1	6.50222	INIP	5.13128	FADS2	5.70244	FAM229B	6.08448
189	TRAF3IP3	6.90684	RBBP7	5.16544	PRRT3	6.50204	BEND5	5.12592	NMI	5.6963	TMEM54	6.07417
190	IDH2	6.89252	GPM6B	5.16471	ZNF165	6.49941	MAGI1	5.11633	LST1	5.69394	LST1	6.05604
191	POLE4	6.8895	MINOS1	5.16229	PLAGL1	6.49925	WDR46	5.11506	TMEM256	5.69089	S100A16	6.05204
192	EFCAB1	6.88751	GSTM3	5.15438	GLS2	6.49866	BOLA3-AS1	5.11484	TMEM136	5.67865	RAPGEF4	6.05184
193	EFEMP2	6.88701	MEIS3	5.14325	CERK	6.4947	LRRC14	5.11323	FAM110C	5.67561	RAET1E-AS1	6.04467
194	CKS1B	6.88653	PAAF1	5.13567	ATP4A	6.49447	SARS	5.11319	TRIM27	5.67422	TIMP2	6.03633
195	LINC00461	6.88361	HSD11B1L	5.13437	TBC1D30	6.48555	DLD	5.11282	TATDN1	5.67289	RPL39	6.02907
196	TRAPPC2L	6.88358	CCDC167	5.13057	C1RL	6.48479	CCDC51	5.11104	MT1A	5.67127	HSD17B8	6.02192
197	GTF2H5	6.88315	XPO6	5.12789	SLC25A17	6.47954	NDUFV1	5.11082	RPL41	5.66644	HLA-DOA	6.02041
198	POLR2L	6.88217	PUF60	5.12463	MID2	6.47791	TESPA1	5.10752	IGFBP5	5.6656	UBA52	6.0111
199	PLPP3	6.88006	SH3RF1	5.11498	BAK1	6.47702	NSF	5.10731	NSFL1C	5.66227	RPLP1	6.01069
200	ITGB2	6.87025	LYPD8	5.11207	RANBP17	6.47311	JKAMP	5.107	RNASEH2C	5.65948	MAD2L2	6.00858
201	GMFB	6.86875	TBCA	5.11005	IFFO1	6.47215	NARF	5.09952	ECHDC3	5.65824	BCHE	5.99918
202	DOK1	6.86666	TBCB	5.10167	DCAF1	6.46855	CCM2	5.09601	RPS20	5.65781	THNSL2	5.99566
203	NDUFAF8	6.86432	CLU	5.09469	ARHGAP39	6.46582	MAP2K2	5.09457	NUDT2	5.65659	LSM7	5.9911
204	FABP7	6.85794	PCSK5	5.09449	NR1D1	6.4569	PDK3	5.08672	LOC101927420	5.65624	SLC25A23	5.98868
205	KLRC2	6.85698	C12orf45	5.09436	KCNH4	6.45577	APBB3	5.08645	TBXA2R	5.65594	TLR1	5.98128
206	DDAH1	6.85454	LOC101927811	5.09283	IGLL3P	6.44981	ACSF3	5.07504	RPL27	5.64852	ADD3	5.98073
207	YPEL1	6.84641	KXD1	5.09048	TBCE	6.44646	C3orf80	5.074	SLC26A11	5.64815	MMAB	5.97491
208	NBDY	6.84363	ACTR10	5.09005	GPLD1	6.44273	RTCB	5.07399	SARNP	5.64567	HIST1H2BK	5.95981
209	EFNB3	6.84268	MYL5	5.08941	CFAP69	6.4422	COASY	5.06821	GLI3	5.64087	ZCCHC17	5.95831
210	ACAA2	6.83423	HGF	5.08791	CPNE9	6.44045	SAP30L	5.06608	ARHGAP5-AS1	5.63805	HACD1	5.95746
211	GAR1	6.82385	SCARA5	5.0818	RASGRF1	6.43968	MRPL46	5.06377	MAFG	5.63333	KLRC2	5.95431
212	SLC25A18	6.82335	TRAPPC2L	5.07606	GRAMD1B	6.43807	SIAE	5.06363	MYADM	5.63112	CDC16	5.94876
213	PRKCD	6.8222	ACTG1	5.07468	INSM2	6.4278	PEPD	5.05874	ATP5ME	5.62662	MAFG	5.94782
214	SPATA33	6.81679	WDR66	5.07256	SDR16C5	6.42535	VILL	5.05834	MT1L	5.62379	CHMP2A	5.94285
215	DIRC2	6.81587	RPS2	5.06976	ITM2A	6.4246	TVP23A	5.0552	PAXIP1-AS1	5.62376	ELMO2	5.93917
216	SMIM27	6.81086	HES4	5.06887	PDE4A	6.42448	MFSD3	5.05496	DKFZp779M0652	5.6216	IGFBP5	5.93707
217	PTN	6.8047	AGTPBP1	5.06639	HCG4	6.41629	ST3GAL4	5.05314	TRAF3IP3	5.61637	ERBB2	5.93368
218	MT1G	6.78886	MDGA1	5.06601	RET	6.4063	STXBP5	5.05131	ADGRG1	5.61493	FUT10	5.93199
219	RREB1	6.78795	SMARCD3	5.04886	URM1	6.40493	NFE2L1	5.04819	TMEM108	5.61079	KIRREL2	5.93026
220	CCDC167	6.78773	DDRGK1	5.04741	LINC00599	6.40309	ASGR2	5.04798	ARHGEF40	5.60932	ZNF525	5.92772
221	DAD1	6.78606	DCAF11	5.04402	PPARGC1B	6.40271	TUBA3C	5.0459	FAM229B	5.59704	FAM107A	5.92577
222	LIX1	6.78103	MZT2B	5.04157	ANKH	6.40198	IGFBP6	5.04289	SLIT1	5.59495	HSD17B10	5.91621
223	SELENOW	6.7808	HTR7P1	5.04082	PKD1	6.40029	SYDE2	5.04229	STUM	5.59223	LY86	5.9161
224	SLIT1	6.77914	TMEM256	5.04006	ANKRD29	6.3984	MTRF1L	5.04156	SNAP29	5.59086	MT1G	5.91106
225	PEA15	6.77816	GRM3	5.03648	HAUS8	6.39643	TMEM183A	5.04064	KLRC2	5.58824	TMEM136	5.91041
226	SNRNP27	6.77596	TMEM263	5.03174	ZNF287	6.3946	ABCF2	5.03884	XYLT1	5.58587	ARHGDIB	5.90239
227	ANK3	6.77496	GNAQ	5.03108	SPIN3	6.39382	ZNF554	5.02646	CAMK2D	5.58204	VAMP8	5.89898
228	LAMA1	6.77276	PYCR1	5.03074	KREMEN1	6.3934	KHDC1L	5.02566	SPPL3	5.58096	LOC728715	5.89614
229	CFD	6.768	SOWAHD	5.02777	MACROD1	6.39289	PHLDB2	5.02476	SQLE	5.57989	EFCAB1	5.89194
230	METTL6	6.76431	RNF181	5.0277	NECAB3	6.39104	ELOF1	5.0235	CD68	5.57866	TMEM238	5.8914
231	RNF150	6.76186	TRIP12	5.0271	ASB13	6.3907	NMRK1	5.01983	C5	5.57488	RPL27	5.88039
232	PRDM16	6.7617	ECHS1	5.0193	METTL24	6.38817	ARMCX3	5.01366	CEBPA	5.57374	HSD17B6	5.87078
233	NANOS1	6.75661	KCNMB2	5.01768	SLC35B4	6.38511	ATP6V1A	5.0107	ANK3	5.57344	DENND1A	5.86674
234	SLC26A11	6.75333	NMI	5.01756	RMND5A	6.38349	GOT1	5.01002	RBP4	5.56198	TAF10	5.86649
235	RPS27A	6.75026	GGTA1P	5.01744	FLT3	6.37746	C12orf43	5.00039	TYROBP	5.56005	RREB1	5.8662
236	KCTD4	6.74284	GAP43	5.01578	DPY19L2P2	6.37358	LOC407835	4.99584	MAGEH1	5.55488	PRSS35	5.86349
237	MT3	6.74116	LINC01197	5.01368	HECTD1	6.37267	CIDEC	4.99433	RPL37A	5.55037	PSORS1C1	5.8623
238	MT1X	6.73892	NMNAT3	5.01234	LRCH1	6.36951	RINT1	4.99405	C1QA	5.54831	ZNF727	5.85756
239	SLC16A9	6.73709	TMSB10	5.00042	SEMA7A	6.36648	CLPTM1L	4.99386	SORCS2	5.54405	HEPH	5.85099
240	SARNP	6.73669	EMG1	4.99383	TNFRSF25	6.35945	KHDC1	4.99027	RPL35	5.54303	HLA-DMB	5.84787
241	SMIM29	6.73289	STK25	4.99112	MTRF1	6.359	ZNF576	4.98981	ANO3	5.53603	PLB1	5.8412
242	RPS20	6.73079	TM2D3	4.98888	SLC25A37	6.3417	PWP2	4.98955	ZBTB44	5.52076	CYBB	5.84039
243	TRIL	6.72816	LINC00461	4.98785	CA7	6.3351	TMEM184C	4.98931	C12orf76	5.5166	RPS18	5.84011
244	TMEM208	6.72362	IVD	4.98361	KCNC4	6.31766	NDUFS2	4.98909	TMEM54	5.51513	SNAP29	5.83502
245	CYBB	6.71894	TNFAIP8L2	4.98038	ARMCX4	6.30845	POLR3D	4.98759	PPP2CB	5.51469	FKRP	5.83468
246	ZFP36L1	6.71855	TBXA2R	4.97868	TIFA	6.30581	CRYBA2	4.98474	PLPP3	5.50896	MGMT	5.83017
247	WDR86	6.71502	GABRA3	4.97351	SETD6	6.30416	PMPCB	4.98418	LSM7	5.50795	RPL32	5.82709
248	GPRIN2	6.71404	RRP7A	4.95676	LMLN	6.30063	CMAHP	4.98213	MLC1	5.5059	RRP7A	5.82438
249	GNG12	6.71316	LGI4	4.95439	DIS3L2	6.29882	DCUN1D4	4.9819	UCHL3	5.50562	LOC101927752	5.82128
250	ST5	6.70853	NT5DC3	4.94697	ZFYVE9	6.27855	GTDC1	4.98088	ZNF727	5.49977	LYPLAL1	5.80878
251	HADH	6.70755	EPHA10	4.93855	LOC728743	6.27738	MPC2	4.98026	KIF21B	5.4944	RNASET2	5.80243
252	CX3CR1	6.70697	MBOAT2	4.91519	CCDC58	6.27452	BLVRA	4.97936	MMAB	5.49339	PSENEN	5.79788
253	LOC440934	6.70538	PIK3CD	4.91462	ZNF362	6.2717	KCNJ4	4.97917	TLR2	5.48927	SELPLG	5.79679
254	MYL5	6.70093	C16orf95	4.91373	RHBDL3	6.27098	PC	4.97903	MT1JP	5.48615	GDE1	5.78732
255	CEBPA	6.69808	TTYH1	4.91157	METTL15	6.27038	KDM3A	4.97867	SLC7A7	5.485	GTF2F2	5.78377
256	FOLR2	6.6927	LYN	4.90942	RORA	6.26809	PPP2R5B	4.97859	ADGRA3	5.48002	RNASEH2A	5.78081
257	NMI	6.69247	DPYSL2	4.90585	QRFPR	6.26578	PCYOX1L	4.97638	LGI4	5.47884	SMIM29	5.77932
258	HNRNPC	6.68983	FAR2P1	4.90408	FOSB	6.24865	DPH3	4.97316	RRAS2	5.47709	SIL1	5.76024
259	ST6GALNAC6	6.68811	AGA	4.9028	MIAT	6.24272	DHRS7	4.97295	ZNF706	5.47158	GNG12	5.75984
260	MYDGF	6.68694	POLR3GL	4.9005	PWAR5	6.24144	NTHL1	4.97217	RRP7A	5.47062	RANBP3L	5.7567
261	C1QB	6.68694	IFI27L2	4.89813	UPP1	6.24136	SLC25A11	4.97164	GRM3	5.46785	BCL7C	5.75307
262	ADD3	6.68654	JUN	4.89224	GPAT3	6.2403	ZMPSTE24	4.9698	GMFB	5.46721	LINC00982	5.74992
263	LOXL1	6.68203	EFHC2	4.8917	GNB3	6.23508	SUCLA2	4.96824	PTPRA	5.467	SARNP	5.7495
264	ITGAX	6.68066	GNAI2	4.88404	CACNA1C	6.2259	RNF128	4.96478	EZR	5.46587	CASTOR1	5.74568
265	FZD2	6.67804	ACAD9	4.87927	PKD2L2	6.22574	KCNS3	4.96026	SCN3B	5.46515	WDR86	5.74006
266	GPR34	6.67696	KLHDC8B	4.87496	SEC62	6.22531	SDHA	4.95454	DDRGK1	5.46234	CAMK2D	5.73988
267	SNX7	6.67657	LINC01485	4.87343	MIR124-2HG	6.21691	BCAT1	4.95131	ZNF350	5.46115	RASAL3	5.7312
268	FYB1	6.67436	RPL27	4.8725	CEMIP	6.21639	RNF8	4.94663	GABRB1	5.4561	SLC16A9	5.72511
269	DHRS9	6.67039	NPY	4.86775	ERICH5	6.21209	SPARCL1	4.94485	RHBDF2	5.45606	RPS24	5.72217
270	CHRDL1	6.66807	PMVK	4.86742	RBBP4	6.21086	PNMA8B	4.94311	PUSL1	5.45355	UCHL3	5.71988
271	PLAC9P1	6.66483	STX12	4.86499	DEFB131A	6.21058	LUZP1	4.94055	TAF10	5.45075	MT1F	5.7183
272	DIO2	6.66446	CCBE1	4.86305	LRFN5	6.20152	GMPPB	4.93965	S100A16	5.44889	S100Z	5.71617
273	RNF181	6.6642	MGST1	4.86287	YARS	6.19778	RUVBL2	4.9392	SYK	5.44576	TRIL	5.70959
274	VBP1	6.66344	TATDN1	4.85807	DDX11	6.19549	DYNLT3	4.93817	RAB36	5.44437	NUDT2	5.69593
275	AP3S1	6.66066	IFT27	4.85231	DMKN	6.19473	PPIE	4.93738	TTYH1	5.43221	DIRC2	5.6898
276	CACNA1H	6.65993	MRPL30	4.84988	ACVR1C	6.19302	MARF1	4.93691	RPLP1	5.42805	HYI	5.68924
277	ITGB7	6.65791	GSKIP	4.84414	ZIM2	6.18758	CAPN1	4.93674	LDHD	5.42638	CCDC90B	5.68576
278	POLR2G	6.64482	RIOX2	4.84279	CIT	6.18743	AGMAT	4.93421	C1R	5.41881	DKFZp779M0652	5.67989
279	SULF2	6.64263	OLFML3	4.8369	PPARD	6.186	MYADML2	4.92983	STOML1	5.41808	ARHGAP5-AS1	5.67692
280	FAM149A	6.64135	SNCA	4.83535	PILRA	6.18271	RIMKLA	4.92792	CETN3	5.4171	B3GNT5	5.67652
281	CDC16	6.64002	NKAIN3	4.82054	FLJ23867	6.18089	PEX11B	4.92634	CDC16	5.41512	NPY	5.6756
282	CYB5R1	6.63912	EFNB3	4.81253	WDR19	6.17835	PFKP	4.92606	PRDM16	5.40797	IL17RD	5.67556
283	ATP2B4	6.6366	UBE2A	4.80999	OSBPL6	6.17716	RTN4IP1	4.92596	CHMP1A	5.40146	RPL37A	5.66278
284	PON3	6.63643	MYBPC1	4.80928	HSD11B2	6.17539	ADO	4.92316	PSENEN	5.39605	C2CD4C	5.65891
285	TMEFF2	6.62898	LRRN2	4.80749	FAM126B	6.17347	ABCF1	4.91666	FYB1	5.39106	TMSB10	5.65797
286	BEGAIN	6.62815	PHPT1	4.80711	GSDMB	6.17323	FBXL15	4.91379	CHRDL1	5.3848	TYMP	5.65765
287	FAM229B	6.61754	MAGEH1	4.80242	PLCD4	6.16406	MRPS2	4.91372	SNX7	5.37793	RPL21P44	5.6514
288	AKR7L	6.60962	ABCB6	4.80098	SUPV3L1	6.16074	ERRFI1	4.91276	PRKCD	5.37653	LSM3	5.65102
289	PLCB2	6.60709	VPS37D	4.79835	C16orf72	6.15974	LMO4	4.91225	HRH1	5.3719	EIF1AY	5.64796
290	IGSF6	6.60518	RAB36	4.79673	CMYA5	6.15612	DNM1L	4.91091	NMNAT3	5.37011	SOWAHD	5.64464
291	PLS3	6.60038	CHMP1A	4.79654	ESCO1	6.15145	WNT7A	4.90697	LOC101930085	5.36503	TPM3P9	5.64316
292	LYPD1	6.59718	ADRB2	4.79545	ATF6B	6.14494	GGNBP2	4.90692	ZNF710-AS1	5.36141	PUM3	5.64026
293	TAF10	6.59683	PPP4R4	4.78651	SPAG4	6.13763	POP7	4.90297	CCT6B	5.35721	LDHD	5.62957
294	RBP4	6.58789	TP53TG1	4.78473	L2HGDH	6.13513	UQCRC2	4.90073	RASGEF1C	5.35687	SAMD9	5.62917
295	LST1	6.58514	SEM1	4.7837	UNKL	6.13431	SYNGR1	4.90044	ZNF436	5.35269	STK17B	5.62742
296	HSD17B8	6.58396	STK17A	4.77923	PCDHB18P	6.13382	MCCC1	4.8994	RPS2	5.34911	XYLT1	5.62532
297	BBOX1	6.58051	PPP2R3C	4.77018	PIGC	6.12695	PNKD	4.8987	RSPH9	5.34904	SHISA4	5.62029
298	RPL41	6.57967	SVOP	4.76893	CACNA2D2	6.12668	MYBL1	4.89497	SELPLG	5.34529	SEM1	5.61985
299	MOB1B	6.57772	IGSF11	4.76799	PARD6B	6.12479	RALBP1	4.89373	CAPG	5.34505	PPP2CB	5.61585
300	HSDL2	6.57582	ZDHHC4	4.75717	GPR180	6.12207	EXOSC9	4.89006	LINC01197	5.33879	ARPC3	5.61467
301	PUSL1	6.5746	C17orf67	4.75558	MASTL	6.11741	MYO5B	4.88954	CMTM7	5.33663	LOC101927420	5.61291
302	C16orf74	6.57308	ETF1	4.74575	CEP295	6.11245	VCPKMT	4.88895	ADCY7	5.33601	IL17D	5.60844
303	MT1E	6.57199	LINC00982	4.74542	B3GALNT2	6.11098	TMEM178B	4.8884	BIRC3	5.33212	SLC1A2	5.59676
304	CPE	6.56545	SLC7A4	4.74331	PENK	6.10567	AKAP12	4.88795	SAMD9	5.32362	FUOM	5.5924
305	STX17-AS1	6.56322	ECH1	4.73515	KLHL15	6.09665	RAB11FIP5	4.8842	HSBP1	5.31892	PHACTR3	5.58777
306	MT1B	6.56122	PDXP	4.72668	NAALAD2	6.09505	ONECUT2	4.88069	RIOX2	5.31844	DDX54	5.58557
307	SHISAL1	6.55787	KIF21B	4.7233	MIR600HG	6.08865	ABHD12B	4.87731	CPNE6	5.31416	SLC25A48	5.58175
308	KIF2A	6.55673	C5orf49	4.72298	USF2	6.0877	TUBGCP2	4.87557	TFPT	5.31398	GUK1	5.58166
309	ALOX5AP	6.55382	C11orf97	4.71835	LINC01102	6.08235	ASAP2	4.87442	USP9X	5.31391	DENND2A	5.5766
310	PCDH17	6.55249	APOM	4.71679	TBK1	6.07684	ATP2A2	4.86853	TMSB4X	5.31302	RAPSN	5.57531
311	POLR2I	6.55024	FKBP1B	4.71673	ABCD2	6.07424	UBFD1	4.86673	ITGAX	5.30796	MILR1	5.57081
312	RAB27B	6.54948	FAS	4.71368	SLC8A1	6.06851	CKB	4.85944	GRIN3A	5.30464	ZIC5	5.56824
313	PTPRA	6.54197	HRASLS	4.71263	CCNB1IP1	6.06633	ACTN2	4.859	MT1E	5.30452	JUN	5.56625
314	TTYH1	6.53702	CYP46A1	4.71218	SNHG14	6.0563	CLCN5	4.85483	ACAD9	5.30278	HES5	5.56336
315	CLDND2	6.53068	MMD	4.70475	PAPOLG	6.05604	WDYHV1	4.8547	RPL39	5.29335	RPL29	5.56172
316	MMD	6.52917	C19orf70	4.70383	NDUFS1	6.05434	CLSTN3	4.85292	ARFGEF3	5.2929	GPM6B	5.55947
317	KIF21B	6.52604	TOM1L1	4.70383	CLUHP3	6.04145	TMEM14A	4.84709	RGS18	5.29241	RPL41	5.55938
318	ATP5ME	6.52187	STOX1	4.69828	KCNK12	6.03974	ADAT1	4.84706	GPT2	5.29179	CASP1	5.55572
319	P2RY12	6.51991	GBA	4.69693	NR1D2	6.03867	ATP1B3	4.84628	PTN	5.2892	UQCC3	5.54448
320	CASTOR1	6.51338	RPS20	4.69679	TMEM132E	6.03811	SCN2B	4.84083	ADRB2	5.28589	RAP2B	5.53815
321	PEX19	6.51267	SPPL3	4.69167	ODF2L	6.03679	SNRNP25	4.83837	SH3GL3	5.28442	RIOX2	5.53806
322	TLR2	6.51011	PCDH20	4.68944	UCP3	6.0328	TPGS2	4.83802	MT1M	5.28056	YAP1	5.53449
323	EYA2	6.50101	DIO2	4.68518	MAP9	6.03076	OSBPL3	4.83502	ACOT2	5.27901	VANGL2	5.53294
324	NUPR1	6.50011	UBE2Z	4.68487	PJVK	6.02754	HTATIP2	4.83451	JUN	5.27866	HEBP1	5.5329
325	PINLYP	6.49949	C12orf76	4.68349	CUX2	6.02551	OXSM	4.82936	GDA	5.27835	NSFL1C	5.52597
326	LYRM9	6.49874	FLRT1	4.68278	ZNF273	6.02459	CEP63	4.82222	WDR66	5.27333	CLDN10	5.52559
327	DENND1A	6.49862	ATP6V1C1	4.68037	TUBD1	6.02446	NOS2	4.81985	DOK1	5.26586	CMTM7	5.52498
328	SNRPD3	6.49852	WIF1	4.6795	LINC00476	6.01995	CCNB1	4.80507	LOC729970	5.26472	ZFHX3	5.52101
329	ADRB2	6.49784	HTR7	4.67928	RAB24	6.01812	THAP7	4.80254	CHMP2A	5.25989	ISG15	5.51976
330	LMO1	6.49694	LAPTM5	4.6765	CABP1	6.01376	NPLOC4	4.80041	EFHC2	5.25732	GABRB1	5.5092
331	ARPC3	6.49555	TMEM42	4.67491	GGA2	6.0124	STEAP1B	4.80011	HLA-DOA	5.25694	TP53BP2	5.50752
332	IGFBP5	6.49502	SST	4.67455	RGS6	6.01114	PTPRM	4.79834	NBDY	5.25653	TTPA	5.50455
333	PTPRF	6.49301	NELFE	4.67382	DTWD2	6.00781	PREPL	4.79481	HMGB1	5.25521	NMI	5.50416
334	APOE	6.49152	LSM3	4.66676	GALE	6.00585	RILP	4.78991	RNASEH2A	5.2529	TRIP12	5.50166
335	CCDC8	6.49065	CACNA1H	4.6667	DDX3X	6.00563	THEM6	4.78797	HSP90B1	5.24873	ICAM3	5.49639
336	SMARCD3	6.48766	B3GAT1	4.66152	IDS	6.00344	PINK1	4.78791	GABRA5	5.24366	RRP7BP	5.49467
337	CYB5D2	6.48699	GABBR1	4.65887	CTNNAL1	6.00344	DACH1	4.78538	POLR3GL	5.24209	TMPRSS5	5.49443
338	MRPS16	6.48626	TCFL5	4.65861	USP45	5.99673	EPHX4	4.78383	MOB1B	5.23908	GPT2	5.49344
339	THNSL2	6.48615	NADK2	4.65727	DCUN1D2	5.99661	VDAC2	4.78381	LINC00260	5.2388	MBNL3	5.49057
340	ZNF710-AS1	6.47577	PRSS35	4.65586	DSCC1	5.99561	LSG1	4.78379	RPS18	5.23779	SLC44A2	5.48454
341	CALML3	6.47458	ELAC2	4.65333	ZNF718	5.99556	MEPCE	4.78175	DENND1A	5.23288	SLC26A11	5.48271
342	RPL39	6.47357	NUDT14	4.64915	CLN6	5.99342	ETS2	4.78157	PCDH17	5.23264	CMTM3	5.48223
343	LYPD8	6.47253	C1QL1	4.63866	IGLL1	5.99141	SH3BGRL2	4.77954	GPM6B	5.23055	ACAA2	5.48128
344	PKIA	6.47027	KLRC2	4.63823	ZDHHC2	5.99126	APEH	4.77744	SHISA4	5.22706	SCRG1	5.48106
345	CD99	6.46646	SLC7A6OS	4.63377	POMC	5.99101	CENPN	4.77402	ZNF525	5.22595	PLAC9P1	5.47412
346	B4GALT2	6.4622	SH3BGRL3	4.63223	KAT8	5.98663	CYC1	4.7734	ADAMTS19	5.2256	FDFT1	5.47191
347	BCL7C	6.45533	TRIM27	4.6301	ARID4B	5.98448	SNX14	4.77065	MYL5	5.21911	CNMD	5.46887
348	FAM171B	6.45488	OPRK1	4.62903	COL13A1	5.97848	FBXO33	4.77055	LOH12CR2	5.21858	CD99	5.46877
349	LOC440434	6.44949	CLDND2	4.62512	ZNF35	5.97745	ZDHHC3	4.76895	SOWAHD	5.21483	C16orf74	5.4677
350	TMEM176A	6.44918	SWI5	4.62287	SCN1B	5.96882	SUSD5	4.76595	RAD21	5.20673	BLNK	5.46735
351	NSFL1C	6.43791	CD33	4.62181	MRGPRF	5.96648	PHLDA2	4.76304	DNAJC2	5.20526	ACKR3	5.46127
352	TPM3P9	6.43497	SH3GLB1	4.62068	MCF2L-AS1	5.965	MTX2	4.76122	MCUB	5.19867	KCTD4	5.45991
353	ALDH6A1	6.43462	UG0898H09	4.62015	LYPD5	5.96065	ZNHIT6	4.75895	PELI1	5.19767	ARFGEF3	5.45957
354	FGGY	6.42875	CD81	4.61866	ZNF786	5.95488	IMPAD1	4.75633	SCARA5	5.18511	GDPD2	5.45853
355	CD68	6.42147	FILIP1	4.61795	DHX35	5.9548	TTC37	4.75339	MRAS	5.18443	SYK	5.45833
356	RPLP1	6.42125	USP5	4.61649	FER1L4	5.95448	CHEK2P2	4.75319	PHACTR3	5.17818	DERL2	5.45632
357	TNNT1	6.41895	TUBB6	4.61631	PINX1	5.95334	EPRS	4.74855	VAMP8	5.17535	GJA1	5.45474
358	SCRG1	6.41836	DSTN	4.61618	CKMT1B	5.94311	APOL4	4.74612	PYGL	5.1742	ADORA2B	5.45104
359	SH3GLB1	6.41739	RPL12	4.61593	EFR3A	5.93801	CACNB1	4.7437	UBE2Z	5.17265	HSBP1	5.44942
360	SUMF1	6.41585	GCNT1	4.61381	FBXO9	5.93422	LOC100507507	4.74254	RRP7BP	5.16741	STX17-AS1	5.44496
361	CD84	6.41281	C3	4.61313	RUNDC3B	5.93344	CRYBB1	4.74192	EIF3J	5.16392	APCDD1	5.44425
362	NACC1	6.4097	PLAC9P1	4.61248	ARHGAP27P1	5.93306	USB1	4.74141	SGSH	5.15661	ZNF710-AS1	5.43614
363	SOWAHD	6.40891	TUBA1A	4.61055	MFAP3	5.93226	TTC9	4.74105	TTPA	5.15487	EFNB3	5.4261
364	ALDH9A1	6.39518	TRIM22	4.60715	FOXN3	5.92877	TRIM37	4.7403	MSANTD1	5.14855	CHRDL1	5.42025
365	HSD17B10	6.39253	DOLPP1	4.60508	FAM78B	5.92838	MYO5A	4.74005	MT1X	5.14737	CRIP2	5.41845
366	RPL36	6.39112	LCP1	4.60474	SGO2	5.92603	LAMA2	4.73894	EFNB2	5.14384	KCNMB4	5.41778
367	C12orf75	6.38653	C5	4.60299	TRIM7	5.92334	TERF2	4.73742	ARHGAP4	5.14243	MESP1	5.41594
368	DYDC2	6.38503	HEBP1	4.60216	NEXN	5.91894	TACO1	4.73434	APBB1IP	5.14211	NUPR1	5.41575
369	WTIP	6.38304	PRSS23	4.60073	MIR9-3HG	5.91772	PCDHB9	4.73376	GUK1	5.14048	GRIN3A	5.41544
370	TATDN1	6.37605	DCUN1D5	4.59978	DNAAF2	5.91634	SNX12	4.72886	PLB1	5.13949	LOC642852	5.41313
371	MAD2L2	6.37604	SRM	4.59859	IL1RAP	5.9129	ROGDI	4.72739	PTP4A1	5.13948	ZNF572	5.41003
372	ZSCAN18	6.37577	RGS10	4.59825	MCF2	5.91086	PRKACA	4.72482	HSD17B8	5.13682	USP9X	5.40789
373	TMEM158	6.37449	FDPSP2	4.59702	BBS7	5.90866	TCEA2	4.71943	ZFP36L1	5.13539	GSTM5	5.40275
374	GTF2F2	6.37402	SBF1	4.59678	SKIDA1	5.90849	MGLL	4.71721	FAM102A	5.13459	CDC42P3	5.40125
375	TRAPPC6A	6.36598	CUTC	4.59591	NAAA	5.9055	NEFH	4.71642	SLC39A12	5.13426	PTPRA	5.40091
376	LSM7	6.36557	PYCR3	4.59573	FADS6	5.9052	RALY	4.71533	FUOM	5.1325	SQLE	5.39897
377	TMEM159	6.36027	JPH3	4.5918	PIF1	5.90446	AOC2	4.71499	MT1B	5.1324	MAPK3	5.39628
378	LOC105374546	6.3567	TRIM68	4.59091	DNASE1L2	5.88953	CD99L2	4.71142	HEPH	5.1303	IGSF6	5.39311
379	GDA	6.35403	LOC101927752	4.59038	TMEM127	5.88428	PRUNE2	4.70922	LY86	5.1285	DHX58	5.38171
380	DLG2	6.35328	ATOX1	4.58924	MPZL3	5.88145	C11orf74	4.70638	PDGFC	5.12785	FAM102A	5.37804
381	GSTM5	6.35305	FDPS	4.58451	UMAD1	5.8811	PDHA1	4.70035	UQCC3	5.12546	BCLAF3	5.37669
382	CDC42	6.34837	SLC39A11	4.5824	ST3GAL5	5.87823	MAD1L1	4.70008	FAM120AOS	5.1238	ZCRB1	5.37544
383	GRIA1	6.34647	ST5	4.58207	MZF1	5.87268	SLC6A12	4.69681	TMEM53	5.12371	ECHDC3	5.37329
384	TTPA	6.34638	LAMA1	4.58189	RSPO2	5.8718	QPCT	4.69662	PLAC9P1	5.11667	B3GAT1	5.3727
385	GABRA5	6.32945	PON2	4.58042	RPF1	5.86787	PIP4P1	4.69411	CLU	5.10817	IQCK	5.37231
386	SERP1	6.32666	RPL31P11	4.57723	ACAN	5.85721	MORF4L1	4.69392	ZFP64	5.1073	CYB5R1	5.37191
387	YAP1	6.32523	PLPPR1	4.5761	VAMP1	5.85615	NEU1	4.69254	LOC642852	5.10229	PUSL1	5.36838
388	TFPT	6.32022	CERS4	4.57587	EMILIN3	5.85615	PSMC2	4.68976	WDR6	5.10079	NPAS3	5.36632
389	RPS18	6.31396	SCGN	4.57549	HIST1H1D	5.8521	ZBBX	4.68765	SLC25A48	5.09968	HTR1A	5.36328
390	UBL5	6.31335	SARDH	4.57238	FAM155A	5.84078	RGS5	4.68703	LINC02381	5.09402	RPL37	5.36206
391	GNA12	6.30992	VAV1	4.56695	C2CD3	5.84009	TMEM155	4.68663	EIF1AY	5.08613	TEAD1	5.35479
392	BCAN	6.30875	SLC25A48	4.56609	OSBP2	5.83825	WDR74	4.68639	MT1G	5.0848	GABRA2	5.35255
393	C1QC	6.30831	PCDH17	4.56608	PRDM11	5.83819	CDCA5	4.68574	ARPC3	5.08333	PYGL	5.3473
394	MILR1	6.30754	PPP1R32	4.56404	PCDHA11	5.83701	TDRD7	4.68485	HYI	5.07882	SOX9-AS1	5.34239
395	ZFP64	6.30225	MYH15	4.56156	USP36	5.83412	PPFIBP1	4.68363	OPRM1	5.07539	ACSM5	5.34137
396	DNAJC2	6.30049	IARS2	4.55951	WDR70	5.83045	TEX30	4.68117	CYB5R1	5.07456	SLC7A7	5.33656
397	HLA-DOA	6.2936	FAM86EP	4.55887	ADAM22	5.8284	ZW10	4.68009	SELENBP1	5.07403	PINLYP	5.33569
398	HPCAL4	6.29007	EFEMP1	4.55079	KCNC1	5.82711	GSK3B	4.67895	DOLPP1	5.07385	CARHSP1	5.3308
399	RBBP7	6.2897	NR1H3	4.54875	JAK2	5.8234	CLTA	4.67829	HES4	5.07074	HMGN2P46	5.33022
400	TRIB1	6.2855	MMAB	4.5483	EIF5A2	5.82036	LSM11	4.67382	PAX6	5.06725	SHISAL1	5.3302
401	EIF1AY	6.28187	GABRA5	4.54228	CELSR3	5.8186	ATG101	4.67338	MPV17L2	5.06681	LINC02381	5.32792
402	TYROBP	6.27944	MIEF1	4.54061	GNRH1	5.81685	LOC729930	4.67168	PLTP	5.06668	BIRC3	5.3259
403	PPP5D1	6.27604	MT1JP	4.54045	RAB11FIP2	5.81664	IMP4	4.66826	APOE	5.06254	ATP2B4	5.32253
404	ADORA2B	6.27522	DDB1	4.53715	GABRB2	5.81578	KHK	4.66593	NELFE	5.06214	ACY3	5.31896
405	SLCO1C1	6.27507	MEGF9	4.53629	ATP8B2	5.81014	CDC123	4.66415	PDRG1	5.0613	CREG1	5.3189
406	LINC01197	6.27494	ATP5ME	4.53345	CENPJ	5.80919	TRAF3	4.66028	LMO1	5.06029	TNFRSF13C	5.31593
407	LOC101927974	6.27466	KCTD12	4.52279	SEC24B	5.80903	CSTF2T	4.65952	RAPSN	5.05346	LINC00320	5.31585
408	FBXL16	6.27157	PDGFRA	4.52196	NTNG1	5.80743	HAUS7	4.65631	ST6GALNAC5	5.0533	S1PR1	5.31585
409	SLC7A7	6.2707	PRKCD	4.52171	ANKRD37	5.80403	SPHK2	4.65483	ACAT2	5.0511	SIGIRR	5.31362
410	C2CD4C	6.26751	CYP26A1	4.51509	LOC643406	5.80211	GBE1	4.65374	LINC00982	5.04756	ACOT2	5.31191
411	GLOD4	6.26665	ADCY2	4.50736	PDE4DIPP1	5.80162	DIO3OS	4.64653	CASP1	5.04613	SLIT1	5.30561
412	AK4	6.2658	NUDT16L1	4.50683	SNHG1	5.79703	UQCRH	4.64236	GNB4	5.04151	KIF21B	5.30185
413	LOC101927420	6.26383	ARHGAP33	4.50646	PCDHB12	5.79534	TM6SF1	4.64004	KCTD12	5.04099	KCTD12	5.29626
414	CENPVL3	6.26239	ACADL	4.50618	CCDC146	5.79519	TMEM140	4.63909	AGA	5.04019	ABHD1	5.29531
415	STK17B	6.2593	DLG2	4.5051	HERC2P2	5.78945	OTUB1	4.63871	FADS3	5.02775	MARCKS	5.29208
416	CLDN10	6.25797	SLN	4.50507	RTEL1	5.78765	COL5A2	4.63741	RPL32	5.02733	RPS19	5.29122
417	EFNB2	6.2568	PYGL	4.50315	SCLT1	5.78559	AURKAIP1	4.63654	SCRG1	5.02266	PLPBP	5.29032
418	CAMK2D	6.25546	SDK2	4.50195	ST3GAL6	5.7838	GFOD2	4.63456	LIX1	5.02189	TRMT112	5.27858
419	FUT10	6.25325	TOX4	4.50193	LIN9	5.77735	DCTN1	4.63177	FDFT1	5.01852	PON3	5.27562
420	PYCR3	6.25306	PRR5	4.49992	FEN1	5.77584	AACS	4.63163	HEBP1	5.01475	LY6H	5.27518
421	SFMBT2	6.24886	ETFDH	4.49974	FASTKD1	5.77254	RAB4A	4.63132	CASTOR1	5.01159	PCDH17	5.27312
422	LARS2	6.24864	CNDP2	4.49519	CDH7	5.76503	DHX16	4.62796	NR1H3	5.00935	APOM	5.27042
423	GNB4	6.24633	GTF3C6	4.49334	FGF13	5.76246	PPME1	4.62568	TBC1D14	5.00889	SSBP1	5.27022
424	VPS29	6.24414	LSM7	4.49166	SOCS5	5.7614	DYM	4.62465	SEMA4F	5.00749	DDX58	5.26999
425	CENPW	6.24305	SNX3	4.48737	LOC101928087	5.75909	GRID1	4.62299	RRAGC	5.00422	CTNND2	5.2695
426	ZNF525	6.23539	HSP90B1	4.48515	ADAM20P1	5.75852	PIP4K2C	4.62242	CYBB	5.00361	PPDPF	5.26935
427	GLRA2	6.23369	EPOP	4.48391	USP6NL	5.75831	DBNDD1	4.61808	GDPD2	5.00097	WDR6	5.26829
428	FAM102A	6.23319	SUSD3	4.48378	TSNARE1	5.74992	ANKRD27	4.61603	FABP7	4.99869	CPNE6	5.26808
429	RPL35	6.23112	SH3BP5	4.4818	RNF113A	5.7476	KATNAL1	4.60815	TMED10	4.9965	TFPT	5.26761
430	SLC39A12	6.22625	PLS3	4.48062	TTBK2	5.74397	PRPSAP1	4.60152	PLPPR3	4.99444	CEBPA	5.26726
431	C12orf45	6.22379	COA3	4.48017	EMX1	5.74316	NSG1	4.6007	SYT17	4.9942	GNA12	5.26675
432	C3	6.21883	NISCH	4.47992	SGK494	5.74242	ISCU	4.60039	ATOX1	4.99281	SSR4	5.26591
433	PLPPR3	6.21543	IDI1	4.47973	LRRFIP1	5.73828	NRG1	4.59955	SSR4	4.99222	KIAA1147	5.26451
434	RRP7A	6.21188	FAM86FP	4.47864	WFIKKN1	5.73357	COPS5	4.59879	CERS4	4.99144	SRGAP1	5.2634
435	PSMB1	6.21135	WDR48	4.47689	SERTAD4	5.73317	TMEM132B	4.5973	TM2D3	4.98999	LAPTM5	5.26123
436	ANKRD6	6.21018	MRPL20	4.47359	DCPS	5.73316	GPX3	4.59566	RAPGEF4	4.98868	ETNPPL	5.25885
437	CASP1	6.20875	DACT3	4.47212	HIST1H1A	5.73137	NMNAT2	4.59304	RPL21P44	4.98689	BAIAP3	5.2581
438	NECAB2	6.20787	CCT6B	4.47135	CPSF1	5.73	EIF4A2	4.59237	C1QC	4.97887	SLC2A12	5.2532
439	PPP4R4	6.20326	DDAH2	4.47054	LINC01128	5.72801	P2RX6P	4.59236	IDH1-AS1	4.97669	SNTG2	5.2532
440	SLC1A2	6.20217	HPCAL1	4.46651	CPLX1	5.72773	GMPS	4.59232	CDC42P3	4.97153	FABP7	5.25284
441	LY6H	6.20084	MT1X	4.46648	SYT2	5.72486	SLC25A4	4.58948	EXOC6	4.96828	RASAL1	5.24462
442	DIAPH3	6.19975	HSD17B8	4.46472	HELZ	5.72232	ZBTB45	4.58793	NPY	4.96494	HMGN2	5.24077
443	WNT10B	6.19871	LOC101929066	4.46289	NGLY1	5.71751	CORO2A	4.58539	RTL8C	4.96474	EIF3J	5.23917
444	SCN9A	6.18675	DTNBP1	4.46086	TAF1C	5.7111	MFGE8	4.58531	STX17-AS1	4.96384	STUM	5.23226
445	TMEM238	6.18344	SMPD1	4.45992	FAM193B	5.70719	RRP12	4.58394	GMFG	4.95728	FAM120AOS	5.22929
446	IL1B	6.18177	RRP7BP	4.45286	EIF2A	5.70673	ZNF823	4.58279	FAM107A	4.95671	IL13RA1	5.2279
447	LINC01094	6.17825	ANO3	4.45234	TNIP1	5.69884	BCL2L2	4.58119	MYDGF	4.9551	DOCK8	5.22532
448	ERI3	6.17587	PSENEN	4.45166	VCX2	5.69876	CNKSR3	4.5806	UNC5B-AS1	4.94973	ROMO1	5.22525
449	SLC25A48	6.17516	MED10	4.44822	NPIPA8	5.69863	ST8SIA5	4.57963	PYCR3	4.94576	EFEMP2	5.2225
450	RASAL3	6.17473	ANKRD6	4.44663	PRKCB	5.69625	PIP4P2	4.57753	ADRA1B	4.94377	ANKRD6	5.21866
451	ZIC5	6.1741	IDH1-AS1	4.44443	CUX1	5.69594	C3orf18	4.57563	LYRM2	4.94325	CTSO	5.21848
452	RPL29	6.1702	POLR3H	4.4425	OLFML2A	5.69443	CYCS	4.57524	BCHE	4.94201	RSU1	5.21654
453	MZT2A	6.16913	ARHGDIG	4.44158	RSAD1	5.69063	GAL	4.57469	NACC1	4.93841	WIZ	5.21467
454	CMTM3	6.16865	ACOT2	4.43621	ATAD1	5.68953	PHB2	4.57255	TBC1D24	4.93834	TMEM42	5.20926
455	CPNE6	6.16174	CEBPA	4.43579	CDS1	5.68706	SLC25A5	4.57019	SNTG2	4.93663	BEGAIN	5.20818
456	HLA-DRA	6.15946	TSEN34	4.43086	TSPAN9	5.68606	MKKS	4.56594	HES5	4.93112	POLR3GL	5.2066
457	CXorf57	6.15847	GOLGB1	4.42989	ARL5A	5.68318	GRHPR	4.56184	CRYM	4.92915	A1BG	5.20608
458	UQCC2	6.15703	DPCD	4.42938	MFSD9	5.67753	AKAP6	4.5608	GGCT	4.9253	ZNF706	5.20083
459	ICAM5	6.15654	FOLR2	4.42906	DCLK1	5.67679	SCN8A	4.55884	PCSK5	4.92074	SWAP70	5.19928
460	HMGB1	6.15597	PFKL	4.42868	LEO1	5.67387	SLC4A1AP	4.55856	SOX9-AS1	4.92035	IL1B	5.19871
461	ELMO2	6.1543	RNASEH2C	4.42715	LRRC4	5.67184	THEMIS2	4.55738	CTNND2	4.91836	MRAS	5.19765
462	SCN3B	6.15422	MT1M	4.42342	RFX5	5.67111	ST3GAL1	4.55677	CFL1P1	4.91498	GNB4	5.19553
463	C1QA	6.15349	ARMC10	4.41996	SERPINB9	5.6683	MRPL18	4.55588	BCLAF3	4.91137	TPT1	5.19521
464	KLK10	6.15304	MT1L	4.41581	HIVEP2	5.66668	MYOM2	4.55533	FCGR3A	4.90899	GLUD2	5.19204
465	AKR7A2	6.1511	CTNNBIP1	4.41313	SUGP2	5.65878	SNN	4.55157	PPEF1	4.90806	LYRM2	5.19132
466	DDX54	6.14587	HBQ1	4.40487	PTPN2	5.65558	TSC2	4.55111	WIZ	4.90329	SYT17	5.18914
467	CHMP2A	6.14339	PTER	4.40468	LOC727896	5.65414	ZNF425	4.55046	HSD17B10	4.89862	DNAJC2	5.18909
468	TMEM106A	6.14136	FADS2	4.4005	CCDC181	5.65323	SYAP1	4.54978	MAST3	4.89508	KLK10	5.18816
469	PPP2CB	6.14117	MRPL51	4.40037	SMYD4	5.65038	VDAC3	4.54967	S100Z	4.89267	SLC25A18	5.18803
470	WIF1	6.13579	LMAN2L	4.39644	BRINP1	5.64956	KHDRBS3	4.54644	TMEM187	4.89215	NELFE	5.1854
471	ICAM3	6.13308	SELPLG	4.39161	SEC31A	5.64414	KLHL29	4.54502	SNX13	4.89106	RBP4	5.18156
472	TSTD1	6.133	MYADM	4.38856	GAS6	5.64246	SYNM	4.54202	SEM1	4.88869	ZSCAN18	5.17824
473	OLFML3	6.13126	LOC644936	4.38376	CDON	5.63945	EPHB6	4.53914	PUF60	4.8855	CARD16	5.17691
474	C11orf97	6.12659	HDAC11	4.38052	ESRRA	5.63853	TOMM40L	4.53669	ARHGAP28	4.88495	HSDL2	5.17648
475	STOX1	6.12604	SLIRP	4.37928	USP33	5.63767	C6orf106	4.53594	B3GNT5	4.88316	GRIN2C	5.17209
476	C1QL1	6.12377	OAZ3	4.37798	TBC1D4	5.63483	TAB3	4.53371	IGSF6	4.88264	HMGB1	5.16906
477	TMEM256	6.1222	ADCY7	4.37617	KRTCAP3	5.63366	BAG6	4.53349	SLC25A18	4.88235	PTBP2	5.16687
478	SLC7A6OS	6.122	UQCC3	4.37455	BRINP2	5.63303	SLCO2A1	4.53251	RPL29	4.8795	DRAIC	5.16642
479	VAMP8	6.11539	ALDH6A1	4.37385	MOGAT1	5.63218	CFL2	4.53198	PRAF2	4.87899	UMPS	5.16641
480	PHLDB3	6.11371	PAX6	4.37273	RORB	5.63053	KCNS1	4.53012	UMPS	4.87081	CDC42EP4	5.16186
481	TMEM54	6.11188	SSR4	4.37042	MICU3	5.62637	PP12613	4.52876	MAPK3	4.87066	UNC5B-AS1	5.16021
482	SEMA4A	6.10797	PACSIN1	4.36892	STRBP	5.62518	DNAJC16	4.52815	BCKDK	4.86594	ATOX1	5.15092
483	ANAPC11	6.09945	ST6GAL1	4.36852	CREBZF	5.62274	PMPCA	4.52344	RPS24	4.86528	LIX1L	5.14464
484	EMG1	6.09873	RSU1	4.36812	RSRC1	5.61517	PANK4	4.51932	GABRA2	4.8638	AP5S1	5.14039
485	SCPEP1	6.09831	KCNQ1	4.36617	SLC43A1	5.61436	MGAT5	4.51357	CD99	4.86211	TIMM13	5.13929
486	GLUD2	6.09685	EFNB2	4.36577	PIAS2	5.61005	HSPA12A	4.50587	RANBP3L	4.86148	GMFB	5.13925
487	CHRNB1	6.09587	SPATA18	4.36571	ZNF385B	5.60183	RNF41	4.50367	LOC285097	4.86097	SPPL3	5.13922
488	TRMT112	6.09001	HRAS	4.36319	INPP5F	5.60173	SAE1	4.50277	MYBPC1	4.85968	RGS18	5.1364
489	RPL27	6.08831	NIPSNAP1	4.36249	ZNF510	5.59999	SDSL	4.50028	LOC440434	4.85906	NBDY	5.13567
490	LY86	6.08813	MAPRE1	4.36195	PCDHB11	5.59638	TFRC	4.49704	SFT2D1	4.85887	TMSB4X	5.13142
491	SYK	6.08748	ARHGAP28	4.35824	ZNF711	5.59566	FAM213A	4.49159	DVL1	4.85586	LOC285097	5.13107
492	PPP2R3C	6.08445	NUDT11	4.35701	TRMT11	5.59412	MRPL12	4.4908	AGTPBP1	4.84675	CHID1	5.12391
493	LARGE1	6.07873	ARPC3	4.35576	EDNRA	5.58985	SDF2	4.49013	SLN	4.8445	TMED10	5.12287
494	GNG2	6.0739	PSMD4	4.35368	PLXDC1	5.58887	GHITM	4.48969	DPYSL2	4.84325	FZD1	5.12282
495	STUM	6.07221	LOC642852	4.35088	ZNF136	5.58875	NDUFV2	4.48877	EPOP	4.83737	SNX7	5.1169
496	SRGAP1	6.07126	SLC39A12	4.35023	PRIM1	5.58593	POLR2H	4.48712	TMEM42	4.83666	CYTH4	5.11505
497	ERBB2	6.07101	LOC101930085	4.3483	DGCR8	5.58368	NTN4	4.48498	RPL31P11	4.83177	IQCA1	5.11434
498	GPC4	6.06996	GALM	4.34826	SEMA5B	5.57523	IGIP	4.48457	KIAA1147	4.8284	HGH1	5.11231
499	UBE2A	6.06607	CRYL1	4.34638	ARHGEF11	5.57103	UBE2D3	4.4831	TXN	4.82512	PRKCD	5.11186
500	IFT22	6.06107	URB1-AS1	4.34609	PATE2	5.56633	TRMT2A	4.48173	PCDH19	4.82433	WDR66	5.10706
501	TXNL4A	6.05995	MT2A	4.34413	ADAMTS5	5.56479	TNFRSF21	4.47917	DDAH1	4.81708	PELI1	5.10231
502	TMEM164	6.05078	SKP1	4.34345	NPIPB11	5.56402	KCTD9	4.47441	MGMT	4.81513	RSPH9	5.10135
503	WDR66	6.05	ZMAT2	4.33769	CEP192	5.55901	P4HTM	4.4723	LYPLAL1	4.81251	LMO1	5.09316
504	OAF	6.04813	PMM1	4.33613	PIM3	5.55891	CMC2	4.47201	GTF2F2	4.80932	ALDH6A1	5.09195
505	CTXN1	6.04228	PTBP2	4.33469	TGM1	5.55467	MRPL15	4.47182	LOC728715	4.80899	TMEM176A	5.09152
506	FAM181A	6.04187	VAT1L	4.33388	GSTT1	5.55023	TTLL12	4.47143	BAG1	4.80415	ELOB	5.09137
507	FAH	6.04164	UCHL1	4.33373	ZBTB8OS	5.54709	DEXI	4.47122	PPDPF	4.80378	SERF2	5.08753
508	CLU	6.04064	C1QB	4.33161	TBR1	5.54695	MSTO2P	4.46996	MAD2L2	4.80361	RPS2P32	5.08486
509	SLA	6.03994	LDHA	4.3313	WFDC2	5.54412	NDUFA12	4.46893	MIF	4.80336	MOB1B	5.08364
510	LINC02076	6.03992	TMTC1	4.3285	ZNF654	5.54324	TRMT10C	4.46862	CRSP8P	4.79898	CCDC8	5.08072
511	VSIG10L	6.0318	SSSCA1	4.3276	DYNC2H1	5.5429	SLAMF8	4.46495	DOCK8	4.79679	RRAS2	5.08042
512	MBNL3	6.02873	VSIG10L	4.32752	ADAM23	5.53361	AMER1	4.46128	LINC02217	4.79649	SPATA33	5.08041
513	CRIP2	6.02806	SORCS2	4.32411	ZNF487	5.53209	EPN3	4.45848	B3GAT1	4.79525	MAGEH1	5.07978
514	SOX11	6.02761	AQP4	4.32182	TCERG1	5.53022	TWF2	4.45793	CORO1A	4.79482	DDAH1	5.07908
515	TCF7L1	6.02098	SUB1	4.32088	CLMP	5.52934	SPR	4.45791	TMPRSS5	4.79298	MCUB	5.07766
516	RXRA	6.01952	FAM71F1	4.31537	CDK13	5.52407	RIT2	4.45791	ROMO1	4.79093	LINC01197	5.07686
517	KLK7	6.00921	DYRK3	4.31454	TAF2	5.52357	RNMT	4.45678	FBXL16	4.79073	RPL29P2	5.07581
518	SEM1	6.00858	TMEM59L	4.31084	SLC2A6	5.52238	TULP4	4.45575	NIT2	4.78901	DIAPH3	5.07457
519	GRIN3A	6.00514	MGMT	4.31078	CYB5R4	5.52207	AMDHD1	4.45208	APOM	4.7885	CCR5	5.06632
520	SARDH	5.99952	SOX5	4.31018	SLC16A6	5.51928	CDT1	4.45041	DERL2	4.78111	SORCS2	5.05889
521	DACT3	5.99866	FAM32A	4.30715	ZDHHC13	5.51788	FAM168B	4.44528	LINC00320	4.78018	FAM110C	5.05656
522	POLR3GL	5.99766	FBXL16	4.30546	RCC2	5.51476	YPEL5	4.44411	SPATA33	4.77883	EFNB2	5.05582
523	SNHG8	5.99498	BABAM2	4.30485	MEF2C	5.51292	CTSB	4.44089	TUFM	4.7788	LINC01094	5.05162
524	RSPH9	5.99312	SLC26A11	4.30478	PPIP5K2	5.51281	KLHDC9	4.43943	CYB5D2	4.77683	APLN	5.04956
525	TBCA	5.99149	TMEM120A	4.30453	MSRB3	5.51244	PSMG3	4.4366	TMEM176B	4.77474	UBA7	5.04952
526	HEPH	5.98964	RIPOR2	4.30343	CEP120	5.51204	RAPGEF5	4.43649	TRIM68	4.77222	MIR99AHG	5.0479
527	MCUB	5.98716	MT1E	4.30303	NEB	5.50621	TCIM	4.43555	SMPD1	4.7716	SH3GLB1	5.04751
528	CARHSP1	5.98658	CMTM7	4.30093	MAP4K2	5.50561	LDLR	4.43373	ATP6V1C1	4.76933	SEC63	5.04044
529	NPY	5.98555	RIT1	4.29769	COL19A1	5.505	SLU7	4.43329	FZR1	4.76861	MYADM	5.03863
530	DENND2A	5.98497	SFT2D1	4.2967	VSIG10	5.50076	GPR20	4.43322	PPP1R32	4.7685	C12orf45	5.03602
531	RPL37A	5.97987	RUNDC3A	4.29587	AAK1	5.49807	EIF1B	4.43023	SMAD1	4.76826	TMEM108	5.03213
532	ADGRV1	5.97983	ZFP36L1	4.2928	DPT	5.49707	PTPRH	4.42557	MBOAT7	4.76784	PCSK5	5.03121
533	SSSCA1	5.97017	2008-03-01	4.29278	LINC00632	5.49386	FAM206A	4.42093	ACKR3	4.76563	UBE2Z	5.0298
534	ENO1	5.97016	MSMO1	4.2894	EYA3	5.49354	HARBI1	4.42064	FILIP1	4.7638	ZMYND15	5.02958
535	RIPOR2	5.96992	CASC10	4.28846	PAXIP1	5.49203	PAFAH1B1	4.41888	KCNK2	4.76354	SH3GL3	5.02929
536	WLS	5.96366	SLC25A26	4.28834	FZD6	5.49111	DEPP1	4.41869	SELENOW	4.76198	HBG1	5.02913
537	RRAS2	5.96337	SLC35F2	4.28654	ZNF547	5.48766	DNAJC22	4.41715	NXT2	4.76094	RPS15	5.02886
538	FNBP1L	5.96227	UBXN6	4.28623	THBS3	5.48527	CA5BP1	4.41659	RASL11B	4.75971	ZFAND3	5.02865
539	PSORS1C1	5.9607	IMPACT	4.28447	PLEKHA6	5.4845	NOVA1	4.41324	FOXRED2	4.75205	CHMP1A	5.02836
540	RAC2	5.95945	RASAL1	4.28386	LOC100294145	5.48437	ITGB1BP1	4.41309	RASAL3	4.75185	GASAL1	5.02814
541	COL5A3	5.95584	PNPLA3	4.2822	NFYC	5.48404	C9orf129	4.41141	LMAN2L	4.74829	FBXL16	5.02685
542	TMPRSS5	5.95562	STX7	4.27937	SLC36A1	5.48054	YIPF3	4.41004	SIGIRR	4.74582	DVL1	5.02214
543	RNASEH2C	5.95488	PDRG1	4.27649	CHIC1	5.47879	NABP2	4.40943	ALDH6A1	4.74526	PDGFC	5.01913
544	RPL21P44	5.95113	MPI	4.27484	RNF165	5.4767	NTMT1	4.40693	E2F3	4.74511	MXRA8	5.01814
545	ADIRF	5.9498	PCOTH	4.27417	N4BP2	5.47644	SMIM8	4.40666	CCDC3	4.74045	CD81	5.0177
546	GTF3C6	5.94955	FDFT1	4.27208	TRMT9B	5.47296	PTPRK	4.40317	SVOP	4.737	RPS12	5.01568
547	RAB34	5.94951	MTA3	4.27162	KBTBD3	5.47242	ATP6AP1	4.40251	SNRPG	4.73686	RALA	5.01311
548	B3GNT5	5.94182	CTXN1	4.27153	KLHL11	5.46382	ACHE	4.40002	SNCA	4.73406	DHRSX	5.0121
549	GGCX	5.93603	CEP170B	4.26968	RELL2	5.46223	ATP5MC2	4.39992	TYMP	4.73301	FAM105A	5.00864
550	HEPN1	5.93557	DKFZp779M0652	4.26839	MTPAP	5.45986	MALSU1	4.39967	CMTM4	4.73171	RAB36	5.00644
551	RPL32	5.93441	RPL29	4.26718	LINC01011	5.45776	RXFP1	4.39846	C12orf45	4.73118	C8orf46	5.00458
552	DHX58	5.92423	PRNP	4.26678	TOB1-AS1	5.4565	ASNSP1	4.3982	SLC16A9	4.7294	GABRA5	4.99987
553	PLTP	5.9176	FAM162A	4.2641	TSHZ1	5.45639	FNDC4	4.39409	TMEM176A	4.72502	LIX1	4.99982
554	MIR99AHG	5.91501	ADAMTS19	4.26276	REEP2	5.45405	PPARG	4.39312	TREM2	4.72235	SCARA5	4.99751
555	S100Z	5.91481	CREM	4.25958	ANKRD16	5.44911	SFXN4	4.39294	TMEM238	4.71952	SLC35F2	4.99234
556	SEC11C	5.91333	UBE2L5	4.25525	TUBGCP3	5.44602	AIRE	4.39018	TYW5	4.7187	FLRT1	4.98945
557	AP2B1	5.91198	EIF3J	4.25064	MATN4	5.44552	SLC16A14	4.38804	BBOX1	4.71754	PLEKHA7	4.98643
558	NMNAT3	5.91174	CXorf57	4.24838	FAM216A	5.44311	HTR5A	4.38748	TOMM6	4.71643	PYCR3	4.98386
559	MYH15	5.91162	CRYZL1	4.24787	TNKS	5.4332	TBC1D22B	4.38726	SPON2	4.7152	GMFG	4.98068
560	SORCS2	5.91158	PTN	4.24733	ZNF232	5.4302	SPECC1L	4.38608	RPS15	4.71389	ACOX2	4.97968
561	TCEA3	5.91143	TMEM54	4.24713	RAB37	5.42693	SLC25A32	4.38468	2001-03-01	4.71153	B4GALT1	4.9731
562	CRYZL1	5.91076	MT3	4.24629	RAD54B	5.42606	HSPA8	4.38083	RREB1	4.71112	TOMM6	4.96868
563	MGMT	5.90899	TPST1	4.24463	ZCCHC7	5.4241	DHX38	4.38066	ADORA2B	4.71089	LINC02482	4.96638
564	DTNBP1	5.90291	SCG3	4.24363	H1F0	5.42069	PRADC1	4.38021	GPM6A	4.70945	FDXR	4.96488
565	MARCKS	5.90076	TG	4.2416	LCA5	5.41785	PKDCC	4.37885	LSP1	4.70916	CSF1R	4.96416
566	BLNK	5.89938	TIMP4	4.24158	TRMT2B	5.41716	MRPL27	4.3778	WFDC1	4.70349	GPSM1	4.96261
567	RIOX2	5.89726	MT1B	4.23905	MAP3K3	5.41651	STUB1	4.37746	LARS2	4.70308	CLNS1A	4.96112
568	ACADL	5.89544	USF3	4.23617	TSEN2	5.41428	AIMP2	4.37596	SLA	4.70268	PAPLN	4.9571
569	TUBB2B	5.89391	AKR7A2	4.23602	BMS1P4	5.40928	SNX21	4.37472	HSD11B1L	4.70198	CXCR4	4.95692
570	NEBL-AS1	5.89328	CD83	4.23258	LZTS3	5.40866	ENDOG	4.3736	THRA	4.7016	LOC101928370	4.9562
571	MBOAT7	5.89099	SP5	4.2325	MRPL34	5.4065	TMEM70	4.37279	CMTM8	4.70052	MYDGF	4.95582
572	PHACTR3	5.88919	MED16	4.23184	BCL3	5.40552	CRYBG3	4.37263	TPM3P9	4.6896	ST6GALNAC5	4.95564
573	GSTM3	5.88799	MT1A	4.23069	HMGXB3	5.40399	LBH	4.37079	RPS12	4.68897	GDA	4.95538
574	KCNMB4	5.88666	PRAF2	4.2306	DCP1A	5.40343	UQCRHL	4.37039	UBXN8	4.68395	NMNAT3	4.94926
575	LOC728715	5.88447	SEC11C	4.23032	VCX	5.39929	YWHAG	4.36981	HEPN1	4.66983	HSP90B1	4.93881
576	CA11	5.88402	RNF182	4.22949	FAM49B	5.39634	FAM122A	4.36788	DHRSX	4.66887	LPAR6	4.93847
577	ZNF706	5.88027	ARHGEF40	4.22867	PDP1	5.39495	SIK2	4.36723	PUM3	4.66698	LRRC3B	4.93702
578	BATF3	5.88005	MRPL10	4.22825	EDEM1	5.39471	SCO2	4.36379	LPAR6	4.66661	GPR183	4.93462
579	TRIP6	5.8774	MT1G	4.2269	SRPK1	5.39325	FEZ1	4.36331	SEC22C	4.66591	TRIM27	4.93269
580	ITPRIPL2	5.87708	FYCO1	4.22656	SYT12	5.38927	IFT46	4.36241	HSPB3	4.66524	ZBTB44	4.93169
581	LPAR6	5.87364	FAM86C1	4.22304	CYTH3	5.38898	C14orf119	4.35837	TMEM117	4.66522	HAVCR2	4.92994
582	HYI	5.87192	C21orf2	4.22135	FAM169A	5.38078	COL4A3BP	4.35441	NDUFAF8	4.66506	TYW5	4.92785
583	ARHGAP4	5.87038	ORC6	4.21833	CSTF2	5.37863	EVI5	4.35184	PXMP4	4.66252	PAXIP1-AS1	4.92769
584	MYOM1	5.87004	SAMD4A	4.21804	PRMT9	5.37436	LRRC59	4.34997	RNF182	4.66002	LARS2	4.92727
585	IL13RA1	5.86657	CUL4A	4.21773	STIM2	5.37411	MAPK13	4.34873	TMEM150C	4.65337	TMEM176B	4.92714
586	APOM	5.85646	LOC101928111	4.2171	GIGYF1	5.37386	ETV1	4.34739	SSPN	4.65198	UQCC2	4.92626
587	HAVCR2	5.85502	SNRNP27	4.21167	MRPS30	5.37375	QARS	4.34738	SLC44A2	4.6499	GIMAP2	4.92626
588	TYW5	5.85483	SRP19	4.21114	GOLPH3	5.37119	FAM78A	4.3469	AMIGO2	4.64815	OGG1	4.91954
589	HSD11B1L	5.85338	TRIB1	4.21043	PCDHA1	5.36772	NAT8L	4.34606	RILPL2	4.64783	RRAGC	4.91421
590	GNG4	5.85095	NLE1	4.20971	RBFOX3	5.36744	HAGHL	4.34392	ANXA4	4.64513	SCN3B	4.90614
591	FBLN1	5.84909	HACD4	4.20848	ABCA9	5.36476	TUBG2	4.34264	ERBB2	4.64368	DIO2	4.90147
592	PPP1R32	5.84654	C6orf52	4.20163	FBXO21	5.36257	CBLN2	4.34234	CARHSP1	4.64349	CBFB	4.9009
593	NPAS3	5.84632	ACO2	4.20109	DPY19L2P3	5.3621	COL9A3	4.34218	UQCC2	4.64328	TXN	4.90059
594	PCSK5	5.84162	KIAA1024	4.20049	GSAP	5.36131	CISD1	4.34188	HLA-DRA	4.64269	DOLPP1	4.89997
595	RAB13	5.83735	RB1	4.20047	TPTE2P1	5.35989	SELENOI	4.34102	HRK	4.64192	TCF7L1	4.89482
596	UBXN8	5.83665	CHST15	4.19681	IMPA1	5.35863	PHKG2	4.34071	YTHDF2	4.64058	CD84	4.89402
597	BCLAF3	5.8357	ARFGEF3	4.1965	SEC14L1	5.35508	NRBP1	4.33971	MKL2	4.63793	PLPPR3	4.8925
598	CNR1	5.82984	GOLM1	4.19613	AMT	5.35213	PPTC7	4.33886	FERMT1	4.63744	MBOAT7	4.89056
599	GMIP	5.82884	MCTP1	4.19255	FANCC	5.35173	HOOK2	4.33778	OST4	4.63314	CEP83	4.89009
600	VANGL2	5.82676	LINC02361	4.19005	ZDHHC5	5.35101	CHAF1A	4.33661	CLPB	4.63214	GABRG1	4.88946
601	RAPSN	5.82038	PLPP3	4.18899	C19orf66	5.35015	SENP3	4.33276	ACOX2	4.62981	GXYLT2	4.88793
602	PSMB7	5.81564	FYB1	4.1879	CHD9	5.34779	POU2AF1	4.33226	DIAPH3	4.62794	TATDN1	4.88444
603	ATOH7	5.81322	OAZ1	4.18617	PI4K2A	5.34396	MTO1	4.32998	STYK1	4.62376	ERI3	4.88154
604	CCDC90B	5.81277	XRCC6	4.18414	ADM	5.34383	ZFPL1	4.32587	CABYR	4.62373	SLC7A6OS	4.8812
605	B3GAT1	5.80925	CXCL14	4.18332	BRICD5	5.34358	OSBPL1A	4.32135	SDK2	4.62292	APAF1	4.88113
606	SNTG2	5.80896	SGSH	4.1823	PLEKHM2	5.34206	SIRT2	4.3187	CNMD	4.62099	NIT2	4.87767
607	RRP7BP	5.80626	CERS1	4.17922	RALGAPB	5.34178	AUH	4.31646	FIS1	4.6186	SCAMP1-AS1	4.87614
608	ADI1	5.80493	MDFIC	4.17398	ZNF519	5.3385	ANAPC2	4.31598	C16orf74	4.61818	AGA	4.87553
609	TIMP4	5.80223	GDE1	4.17146	DGCR9	5.3371	RASGRP2	4.31157	CYHR1	4.61776	ISOC1	4.87202
610	MAGEH1	5.80021	GPR68	4.17047	LRPAP1	5.33637	PPP2R2A	4.31095	TBCB	4.61771	RAC2	4.86814
611	JPH3	5.79815	DHRSX	4.16968	SLC3A1	5.33441	MRPL47	4.3102	LINC02482	4.61646	TMC8	4.86783
612	MESP1	5.79783	ARL8A	4.16653	RING1	5.33255	ATP1B1	4.30757	FLRT1	4.61513	TEK	4.86691
613	GJA1	5.79713	DNAAF4	4.1661	AR	5.32813	ZKSCAN5	4.30615	SH3GLB1	4.61121	ENOX1	4.86628
614	APLN	5.79343	JMJD4	4.16604	ABCC1	5.32577	CAST	4.30504	RSU1	4.60951	SF3B6	4.86395
615	C8orf46	5.78845	MRPS18C	4.16336	SLC9A1	5.32173	ATP1A1	4.30486	BCL7C	4.60914	ANO3	4.86284
616	GDE1	5.78631	TUBA1B	4.16233	FANCI	5.32007	NUMB	4.30395	SLC35F2	4.60628	PPP1R32	4.86247
617	IQCK	5.7858	AMIGO2	4.16069	CADPS2	5.31977	BFAR	4.30288	IGSF11	4.60239	OAF	4.86151
618	DVL1	5.78463	FAT1	4.15989	B3GALT1	5.31323	TUBB4A	4.30229	PCDH20	4.60101	WTIP	4.85642
619	RILPL2	5.7836	RRAS2	4.15862	UBAP1	5.31322	ENPP4	4.30193	ADI1	4.60075	ADI1	4.85603
620	GABRG1	5.78352	CNTN1	4.15602	ETV6	5.31165	PAPD4	4.29612	LRRC3B	4.59916	OST4	4.84828
621	NTSR1	5.78313	LOC101060091	4.15594	TMEM223	5.30533	USO1	4.29349	DHCR24	4.59868	DENND1C	4.84823
622	UBA7	5.78267	ATP6V1E1	4.15374	GK	5.30403	EFNA3	4.29251	PLEKHA7	4.59705	DARS	4.84726
623	ATOX1	5.7811	COL16A1	4.15318	L3MBTL2	5.3031	ERICH1	4.29233	IQCK	4.59558	KLRC1	4.8463
624	FXYD6	5.78087	ATP2B4	4.15247	KSR2	5.30249	RCCD1	4.29137	YAP1	4.59404	DDRGK1	4.84505
625	SOWAHA	5.78082	MEA1	4.15102	TRIM32	5.30198	FAM92A	4.29033	CMTM3	4.59394	MPV17L2	4.83817
626	FABP5P3	5.77479	NPC2	4.15064	TIAM1	5.30148	RHOF	4.28694	CAP1	4.59183	FXYD6	4.83719
627	LAPTM5	5.77186	MANF	4.14957	ASB8	5.30107	SLC7A8	4.28507	IL17RB	4.58746	FBLN1	4.83715
628	PID1	5.77154	RPL31	4.14699	KMT2E	5.30079	PARL	4.28219	SERF2	4.58627	RPL19	4.83349
629	UBE2S	5.76268	RTBDN	4.14674	UNC13C	5.29943	SH3GLB2	4.2816	TP53BP2	4.58513	LINC02217	4.82258
630	RPL31P11	5.76124	DMAC1	4.14418	ZNF670	5.29712	ENO3	4.27929	PTBP2	4.58448	SGSH	4.81998
631	NUDT2	5.7597	ZSWIM9	4.14279	LIN7A	5.28872	IFIT2	4.27844	CD81	4.58319	HILS1	4.81771
632	IQCA1	5.75953	RPS3A	4.14258	ZNF781	5.28028	SGTB	4.27677	ASH2L	4.58247	TECPR2	4.81737
633	PPM1M	5.75879	SLC25A18	4.14166	ABCG4	5.28009	HS3ST5	4.27458	LINC01094	4.57968	THRA	4.81547
634	RGS18	5.75559	MR1	4.14055	COL7A1	5.27519	STN1	4.27228	IL13RA1	4.57787	ICAM5	4.81423
635	IL13RA2	5.75397	TCTA	4.1361	SRRM3	5.27197	COA1	4.27011	ADTRP	4.57741	CALU	4.81404
636	SHISA4	5.7532	ADD3	4.13565	TFB2M	5.27118	BAG5	4.26538	ACSM5	4.57643	ADAM28	4.80521
637	ATXN10	5.7466	MYL6	4.1355	VAV3	5.27048	ATP5F1B	4.26482	NOV	4.57345	IDH1-AS1	4.80514
638	SMIM10L2A	5.7463	PTS	4.13494	PANK1	5.2685	UNC119	4.26479	SIDT2	4.57288	GMIP	4.80477
639	ZFHX3	5.74239	SH3GL3	4.1348	TAF4B	5.26799	MANBAL	4.2646	JPH3	4.5721	FZD8	4.80374
640	ARNT2	5.7392	NAA35	4.13441	SLC38A11	5.26464	ELAVL3	4.26408	GIMAP2	4.56592	MANF	4.79564
641	TMC8	5.73811	CHRNB1	4.13196	ZNF615	5.26309	LYNX1	4.26302	RPS19	4.56525	PLIN5	4.79496
642	PAXIP1-AS1	5.73698	TMEM187	4.13026	VWDE	5.26214	ATF4	4.25711	PEA15	4.56506	INTS4	4.79422
643	CEP170B	5.73287	LOC148413	4.12244	CNNM1	5.25882	LAMB3	4.25706	RPS21	4.56319	CSGALNACT1	4.79359
644	PAPLN	5.72908	RHBDD2	4.12037	UBE2O	5.25707	RNF167	4.25652	GNG12	4.56203	TREM2	4.7928
645	NUS1	5.72846	MRTO4	4.12011	GPR85	5.24881	G0S2	4.25562	GNA12	4.5596	IGSF11	4.79276
646	LIX1L	5.72608	PPEF1	4.11895	RGS7	5.24881	SYNCRIP	4.25499	ADHFE1	4.55453	JMJD7	4.79193
647	HEBP1	5.72302	UBL5	4.11692	TWNK	5.24481	PMS2	4.25479	UBA7	4.55061	RAD21	4.79056
648	GPR143	5.72105	ARL15	4.1131	CCSER1	5.23995	STARD4	4.2547	GMIP	4.54702	UTP11	4.78794
649	THTPA	5.72062	HSD17B6	4.1129	ZSCAN31	5.23685	SDK1	4.25462	ZCRB1	4.54674	MYO10	4.78659
650	DSEL	5.71833	WFDC1	4.11008	FAM71E1	5.23629	ZBTB4	4.25413	AP3S1	4.54616	BCAN	4.78337
651	NTSR2	5.71603	COMT	4.10965	NUB1	5.23044	MTIF2	4.25398	ABHD1	4.54608	ENPP1	4.78286
652	SLC30A10	5.71601	PSORS1C1	4.1056	RPEL1	5.22706	ANXA6	4.2537	CRYL1	4.54099	RPL31P11	4.77477
653	SH3BGRL3	5.71594	SNX13	4.10555	TIGD3	5.22694	RPUSD1	4.25286	FAM149A	4.54077	LOC729970	4.77281
654	HES5	5.71485	LOC101927318	4.10469	RPL15	5.22458	ATXN7L3B	4.24997	VAT1	4.53752	SELENOW	4.77231
655	DOCK8	5.71251	SEC22C	4.10455	TMEM265	5.22348	EXOC8	4.24723	ELOB	4.53681	COL5A3	4.77207
656	SNRPC	5.71203	PEMT	4.10274	BSDC1	5.22319	LDLRAD4	4.24628	PPP2R3C	4.53548	SIDT2	4.77197
657	RPL29P2	5.70942	SHC2	4.09657	ITPKC	5.22307	CD8B	4.24559	OLFML3	4.53499	LOC339803	4.77153
658	RIT1	5.70926	C3orf14	4.09482	ARNTL	5.21778	SNX16	4.24409	CARD16	4.53414	ST5	4.76843
659	STK17A	5.70734	ROM1	4.09136	HEATR4	5.21534	FBXW7	4.24291	ST5	4.52991	MYO1F	4.7672
660	TEK	5.70629	CTNND2	4.0851	ARC	5.21416	HPS6	4.24128	ACY3	4.52412	C1R	4.76345
661	GSTM2	5.7062	CINP	4.08453	FRAT1	5.21141	SLC49A3	4.24094	TCEA3	4.52099	CPAMD8	4.75898
662	RNASEH2A	5.70317	LRRC36	4.08368	BIN3	5.21043	COX11	4.23789	NUPR1	4.51936	RASGEF1C	4.75775
663	EIF3J	5.69698	CISD3	4.08296	UST	5.20847	PPP2R5E	4.2371	STX12	4.51518	RPS26	4.75421
664	RPS24	5.69557	RPL38	4.08183	ABCA7	5.20625	HEXIM1	4.23649	MIR99AHG	4.51516	PPP2R3C	4.75333
665	CBFB	5.69261	BLOC1S2	4.08117	CCDC57	5.2054	RAB7B	4.23485	ROM1	4.51254	PRMT6	4.75242
666	ERFE	5.6913	PIR	4.08056	SMCO4	5.20483	LAPTM4B	4.23473	ZIC5	4.51173	IL17RB	4.75118
667	UQCC3	5.69103	STK32C	4.08028	PALB2	5.20408	GABARAPL1	4.23402	MDGA1	4.51023	CA11	4.75074
668	SAMD9	5.68763	COMMD6	4.07929	STRADA	5.20309	TIMM17A	4.23334	TECPR2	4.50525	FAM149A	4.74802
669	DHRSX	5.6854	TUBB3	4.07753	CUL3	5.20248	PARD6A	4.23329	CLDN10	4.50315	TUFM	4.74758
670	HMGN2	5.68315	SETD9	4.07712	FRMD4A	5.19501	QDPR	4.23205	CD83	4.50178	PEA15	4.74512
671	MT1F	5.68267	S100Z	4.0766	LY6G5B	5.19466	MRPS7	4.23163	WTIP	4.50175	FARP1	4.74373
672	APCDD1	5.68227	UQCC2	4.07431	TRPM3	5.19458	SAP30	4.23159	CNR1	4.50114	TMEM258	4.74253
673	C2orf80	5.68128	NPHS1	4.0737	MAP3K14	5.1927	TMLHE	4.22961	A1BG	4.50096	PUF60	4.73906
674	MYB	5.67863	E2F3	4.07285	TRANK1	5.18985	PDXK	4.22941	CALML3	4.49986	SHANK1	4.73819
675	PLPBP	5.67861	LOC729970	4.07144	GNG7	5.18874	DMAC2	4.22899	GLOD4	4.49865	SMARCD3	4.73773
676	ALKAL2	5.67348	FOXN3-AS1	4.06841	RADIL	5.18786	KCNA3	4.2223	STK17B	4.49828	NSUN6	4.73551
677	OAZ3	5.6729	SMAD3	4.06639	GIT2	5.18628	PSMC4	4.2177	IL17RD	4.49573	RAB27B	4.73399
678	WWC1	5.6723	KCTD15	4.0662	IRS1	5.18581	POLR2E	4.21722	PRMT6	4.49035	GGCT	4.72841
679	ADHFE1	5.67215	TUBB8	4.06376	ZMAT4	5.18232	HERC6	4.21415	SLC1A2	4.48712	DYNLT1	4.72792
680	PUF60	5.67145	THRA	4.06284	NR2C1	5.18064	WDR4	4.21377	PPM1M	4.48667	ERICH6-AS1	4.72443
681	USP9X	5.66926	SCRN3	4.06164	PKNOX2	5.18032	RUSC2	4.21292	GJA1	4.48524	HLA-DRA	4.72075
682	SMIM10L2B	5.66676	ST6GALNAC6	4.06129	PRKACB	5.17985	COX4I1	4.21065	LYPD2	4.48425	MS4A7	4.72033
683	SFT2D1	5.66524	HMGCS1	4.05915	PCNT	5.17924	NDUFA9	4.2102	PCOTH	4.48415	LGI4	4.71831
684	MYO1F	5.66418	SHISA4	4.05912	CDK14	5.17895	DHRS7B	4.2089	PNMT	4.48378	CIB1	4.71677
685	GPM6B	5.66196	RIC8A	4.05886	RPS6KA3	5.17888	COLGALT2	4.20874	2008-03-01	4.48281	MYBPC1	4.71569
686	RPL13	5.66035	SNX6	4.05739	GVINP1	5.17707	RPF2	4.20709	MT1F	4.48242	ABI3	4.71109
687	FLRT1	5.65681	DSEL	4.05564	POLR1B	5.17602	TAX1BP1	4.20663	EEF1B2	4.48166	RTBDN	4.71017
688	HMGN2P46	5.65455	MECR	4.05095	FAM13B	5.17529	EIF5	4.20487	TMEM159	4.48138	PLSCR4	4.70993
689	AHRR	5.65452	FAM102B	4.0456	TADA2B	5.17081	BACE1	4.20327	FREM3	4.47897	RILPL1	4.70631
690	FAM200B	5.65305	HMGCL	4.0438	MBP	5.16819	ATXN3	4.20158	KLHL35	4.47719	PPP2R5A	4.7038
691	PTBP2	5.6527	TRAF3IP3	4.04368	PEG3	5.16535	VSNL1	4.19693	C19orf70	4.47593	SLC29A3	4.70351
692	RIIAD1	5.64889	DDA1	4.04216	IRAK1BP1	5.16014	ALDOA	4.1964	LOC105374546	4.47423	AP3S1	4.70156
693	PLPPR2	5.64221	STAU1	4.0419	MADCAM1	5.15848	MAP2K5	4.19355	BLNK	4.47176	TMEM106A	4.69985
694	PSME2	5.64121	NABP1	4.0393	RAB11B	5.15787	RRS1	4.19268	RPL29P2	4.47004	LGALS9C	4.69966
695	CNPY2	5.63987	UMPS	4.03722	C15orf41	5.15689	PRPF19	4.19267	GPNMB	4.46924	RTL8C	4.69964
696	NAGK	5.63966	SURF1	4.03627	MACO1	5.15614	BNIP3	4.19187	GASAL1	4.46691	STOML1	4.69686
697	AP5S1	5.63247	DERL2	4.0361	NIPAL2	5.15393	DIABLO	4.18698	COG5	4.4641	EPOP	4.69658
698	SLC44A2	5.63138	MAOB	4.0348	FCHO2	5.15366	MSANTD4	4.18647	ZCCHC17	4.46225	HES4	4.69628
699	TP53BP2	5.63101	HLA-DOA	4.0338	TBC1D19	5.15135	PPIF	4.18617	HMGN2P46	4.46157	MIF	4.69551
700	HBQ1	5.62748	ADTRP	4.03099	GFM1	5.15031	ESAM	4.18568	BCKDHB	4.45965	SLA	4.69381
701	TMEM108	5.62642	JADE2	4.02761	ECM1	5.14978	MDGA2	4.18511	MBOAT2	4.45504	RLBP1	4.6888
702	RPS2P32	5.6263	NHP2	4.02728	MIS18BP1	5.14688	KIAA1656	4.1848	MPI	4.45349	CRB1	4.68861
703	TLR1	5.62565	SLC27A5	4.02712	ZBTB43	5.14474	ZNF622	4.18413	KLK5	4.45277	ZNF436	4.68663
704	FOXN3-AS1	5.62156	SLCO1C1	4.02638	PDXDC2P-NPIPB14P	5.14391	PCGF5	4.18174	ZFP69	4.4525	C5	4.68561
705	LOC642852	5.62097	CAPG	4.02615	XYLB	5.14305	DDX42	4.18135	ZSCAN5A	4.45213	ZMAT1	4.68421
706	LOC101927811	5.61679	CDH10	4.02285	ERO1B	5.14259	PSMD11	4.18111	SRGAP1	4.45188	PTGR2	4.68273
707	SCGN	5.61303	ACOX2	4.02037	FLT1	5.14104	FBXL14	4.17916	HMGN2	4.45055	TMEM53	4.67772
708	GABRA2	5.61263	NIPSNAP3A	4.01975	MTCL1	5.13949	RNF220	4.17869	PIPSL	4.4505	CXCL14	4.67303
709	IMPACT	5.61222	NEDD8	4.01876	BRAF	5.13798	PIP5K1B	4.17777	GPR143	4.44722	SLC2A4RG	4.67107
710	FKRP	5.60961	TMEM258	4.01722	CYB561D1	5.13697	SLC25A25	4.17686	TMEM18	4.44636	CLU	4.6609
711	TRIP12	5.6094	MBOAT7	4.01622	ZNF250	5.13694	MIA3	4.17518	FTHL17	4.4446	NDUFAF8	4.65658
712	JUN	5.6091	PLEKHB1	4.01527	GTF3C3	5.13605	PRPF6	4.17134	PSTPIP1	4.44393	PHLDB3	4.65589
713	CCDC153	5.60597	DCTPP1	4.01418	KCNH6	5.13139	BICD1	4.17032	SRP19	4.44374	RPS6	4.65544
714	GIMAP2	5.60502	FDX1L	4.01353	ELL	5.1311	GLIPR1	4.16971	VANGL2	4.44279	HERC5	4.65515
715	ECH1	5.60233	NKAIN4	4.01267	ADRB1	5.12816	ZNF584	4.16923	MUM1L1	4.43494	JPH3	4.65372
716	MSANTD1	5.59868	WDR6	4.0096	FAM84A	5.12791	CPXM2	4.16906	DENND2A	4.43245	SOX11	4.65286
717	ZNF727	5.59645	ASL	4.0093	MROH6	5.12741	HTR1E	4.16897	MANF	4.43153	TRIP6	4.65016
718	GNAI2	5.59632	DNAJA1	4.00869	ZNF774	5.12609	NAE1	4.16847	SNX6	4.43081	SOWAHA	4.64978
719	TIMM10	5.59187	AP3M2	4.00865	HSPA4L	5.12537	SLC25A45	4.16619	EFEMP2	4.42921	SNX13	4.64907
720	MXRA8	5.59099	ITGB8	4.00643	CARD9	5.12521	PART1	4.16616	SSBP1	4.42803	SERPINB8	4.64874
721	BAIAP3	5.58754	MCRIP1	4.0047	UBE2QL1	5.12091	IER5L	4.16494	SLC25A23	4.42801	CAP1	4.64826
722	SF3B3	5.58723	B3GNT2	4.00448	TPTE2P6	5.11721	ZNF365	4.16207	SOX2	4.42781	GLUD1	4.64583
723	PIK3CD	5.58205	ARMCX2	4.00412	ATRNL1	5.11669	BECN1	4.15784	GSS	4.42701	AGT	4.64569
724	ELFN2	5.58063	TBCD	4.00379	NEK4	5.1136	TMEM184B	4.15768	SMARCD3	4.42609	STX12	4.64515
725	RGS20	5.58007	GABRB1	4.00153	LIAS	5.11305	ARHGEF17	4.15404	SNRNP27	4.42552	NPC2	4.6427
726	PAMR1	5.57939	NDUFB8	4.00129	LRRC8C	5.11164	CPPED1	4.15398	PERM1	4.42473	CNDP2	4.64254
727	CPNE7	5.57866	EDARADD	4.00122	ABHD13	5.10865	HAGH	4.15186	INPP5K	4.42448	STX7	4.64238
728	SNAP29	5.57866	TMEM53	4.00114	PRAG1	5.10498	OXNAD1	4.15011	SWAP70	4.42144	GRM3	4.64177
729	SQLE	5.57838	ARHGAP4	3.99936	POGLUT1	5.10438	TMUB2	4.14895	MNDA	4.41918	PTPRC	4.64095
730	ZNF436	5.57492	RPS18	3.99932	ALKBH8	5.10067	SLC35D2	4.14861	APLN	4.41917	LOC105374546	4.64003
731	CARD17	5.57388	MIF-AS1	3.99822	COG2	5.09888	HIGD1B	4.14601	MRPL30	4.4155	TRMT5	4.63712
732	PLIN5	5.57044	PTGR2	3.99801	ABCB9	5.09802	LOC389705	4.14507	LOC100506271	4.41528	SOX2	4.63445
733	ALDH4A1	5.57006	LOC105374546	3.99473	LAMA3	5.09719	C16orf91	4.14495	FAM98A	4.41438	SSPN	4.6323
734	SELPLG	5.56255	CAP1	3.99305	DNAJC4	5.09617	TEX47	4.14311	RTBDN	4.41427	LAT2	4.63129
735	RPL37	5.55567	TREM2	3.99141	SIRT4	5.09361	ALKBH3	4.13863	SH3BGRL3	4.4141	PCDH19	4.62861
736	NISCH	5.55454	TYROBP	3.99103	INSIG2	5.09208	PFKM	4.13746	USF3	4.41124	MNDA	4.62847
737	ENOX1	5.5527	RAB11A	3.9883	COL5A1	5.09163	AMIGO1	4.1367	UTP11	4.4105	ZNF350	4.62196
738	HBG1	5.5517	TMEM130	3.98795	SEMA6D	5.08959	EMC4	4.13669	TIMM13	4.41012	GLOD4	4.62162
739	SLC16A2	5.55094	LRRC2	3.98789	ADAMTS13	5.08522	HECA	4.1364	GAR1	4.40997	RPS23	4.61779
740	CHST9	5.55074	GTF2H5	3.98698	UBA3	5.083	GBA2	4.12969	FAM105A	4.40991	SSSCA1	4.61551
741	ARHGDIB	5.55033	KIRREL2	3.98698	CTIF	5.08159	HAPLN4	4.12904	ALG5	4.40985	EMID1	4.61394
742	SNCA	5.54813	NIT2	3.98676	REPS1	5.08038	FAM189B	4.12603	APCDD1	4.40844	CYB5D2	4.61227
743	MLNR	5.54511	SLC16A9	3.98641	C18orf25	5.07873	AKAP11	4.12583	SSSCA1	4.40666	GPNMB	4.61145
744	RAB31	5.53947	RGL3	3.9862	SMARCD2	5.07839	ATP6V0D1	4.12507	ERI3	4.40452	TCEA3	4.61029
745	GRIN2C	5.53939	HRK	3.98607	PRKCA	5.07386	C1orf43	4.1232	BDH2	4.40435	HPGDS	4.60885
746	RTL8C	5.53682	UFD1	3.98606	SLC39A8	5.07192	RNF141	4.12289	ARPP19	4.40085	ENY2	4.60716
747	CARD16	5.53653	RPS14	3.98533	SAAL1	5.06603	ATP6V0A1	4.12258	COL16A1	4.40067	AMIGO2	4.6052
748	ANO2	5.53611	CHCHD7	3.98491	CCDC66	5.06113	EGFL7	4.11989	ECI2	4.39747	CRSP8P	4.60502
749	CNMD	5.53388	MAGED1	3.98349	ARFGEF2	5.06083	CETN4P	4.11917	UBB	4.39739	FPR1	4.60473
750	IFT27	5.53209	TMEM8A	3.98136	NFIC	5.05478	DNAJB14	4.11901	FRA10AC1	4.39718	BAG1	4.60277
751	CHID1	5.532	MORN5	3.9794	KLF9	5.05331	PI4KB	4.11242	POC1A	4.39523	DACT3	4.59988
752	RASAL1	5.5265	CYHR1	3.97749	TP53AIP1	5.05124	MIS12	4.11058	CBFB	4.39241	AKR7L	4.5991
753	DCAF11	5.51783	HSD17B10	3.97736	LRRC34	5.04828	MAPK10	4.11003	RPS2P32	4.39191	ALDH4A1	4.59273
754	C1R	5.51694	AIF1	3.9766	RWDD2B	5.04359	ZNF329	4.10702	RGL3	4.38936	FFAR4	4.59072
755	TMEM263	5.51615	NOP16	3.97421	ARSG	5.04179	GPR137	4.10538	PINLYP	4.38869	LOC101930085	4.59049
756	DDA1	5.51521	RRAGC	3.97376	CNEP1R1	5.04151	FBXO7	4.10379	MEIS3	4.38788	CHRNB1	4.58914
757	SIL1	5.51398	SFTPD	3.9721	MED23	5.04113	ZNF143	4.09921	LOC101927811	4.38145	SLC1A4	4.58846
758	SCARA5	5.51277	ELMO2	3.96925	PPIL3	5.03936	PSMC3	4.09747	RAC2	4.37956	PYCARD	4.58793
759	GPNMB	5.51216	CPE	3.96897	RPUSD2	5.03898	HES6	4.09687	SLC1A4	4.37851	PET100	4.58434
760	GBA	5.50796	RANBP3L	3.96772	LRRN3	5.03516	MYH10	4.09489	RPL9	4.37549	TFEC	4.58365
761	CTSO	5.50761	FAM102A	3.96532	UXS1	5.03434	HTRA2	4.09398	GGCX	4.37517	HSD11B1L	4.58103
762	WFDC1	5.50663	RPS27A	3.96243	CLVS2	5.03423	MPP1	4.09385	ZFHX3	4.37331	LOXL1	4.57898
763	TPT1	5.50621	ADGRA3	3.96187	LNX2	5.03241	C17orf75	4.09357	CYTH4	4.37306	GTF2H5	4.57553
764	RLBP1	5.5037	COPS4	3.96015	CNKSR2	5.03104	SIPA1L3	4.09298	PET100	4.3718	MSANTD1	4.57365
765	TMEM218	5.5008	ELL3	3.9563	DIDO1	5.02994	CRELD1	4.09274	ICAM3	4.37041	HRH1	4.57334
766	ROMO1	5.50036	FUT10	3.95116	LINC02210	5.02826	PCCA	4.09166	UBE2L5	4.36949	AMZ1	4.57287
767	IL17RD	5.49906	INPP5K	3.95116	DNAJC28	5.02525	SLC22A18	4.09133	CUTC	4.36794	NR1H3	4.57145
768	ZMYND15	5.49885	IQCK	3.95091	ARMT1	5.02427	MLF2	4.09123	HBG1	4.36452	BBOX1	4.56962
769	URB1-AS1	5.49885	TMEM176B	3.94892	SDHAF2	5.02384	ANGEL1	4.09083	PKIA	4.36449	FGD3	4.56899
770	SOX2	5.49877	YTHDF2	3.94725	NOXO1	5.02324	OXR1	4.09029	MXRA8	4.36375	CSTB	4.56782
771	ECHDC3	5.49732	DYRK2	3.94657	ZBED9	5.02207	KIF9	4.08876	RIPK2	4.36103	SH3PXD2B	4.56669
772	STK25	5.49366	FAM86B3P	3.94638	ANKS1A	5.02006	DPAGT1	4.08642	NDP	4.36096	C12orf76	4.55761
773	KIAA1147	5.49344	SLA	3.94627	ITGA11	5.01959	CCNL2	4.0859	PRNP	4.36044	DLG2	4.55658
774	CCDC148	5.49174	RAPSN	3.94486	USP28	5.01783	GPS1	4.08455	CIB1	4.35803	TRPS1	4.55618
775	SLC35F2	5.49092	WRB	3.94342	KIAA1841	5.01744	GPR171	4.08324	ADM5	4.3579	BMP7	4.55214
776	NHLRC1	5.49003	CCDC3	3.94158	HECW1	5.01659	HDDC3	4.07785	PAPLN	4.35589	GRID2	4.54887
777	DCUN1D5	5.48841	DHCR7	3.94146	MAP2K6	5.01657	CDH13	4.07702	TRIP6	4.35463	TMEM230	4.54777
778	CDH4	5.48768	CCDC153	3.94089	ANKS3	5.01625	ARHGAP20	4.07272	RPL26	4.35419	MMD	4.5469
779	APAF1	5.48545	C12orf60	3.93102	LINC00652	5.01298	NEFM	4.07098	RGL1	4.35229	LTC4S	4.54435
780	EIF3H	5.48324	NTNG2	3.93057	CRABP1	5.00993	FKBP2	4.0694	ACTR3B	4.35135	HLA-DRB4	4.5443
781	LOC100506100	5.48104	SOX9	3.92902	CACNA1A	5.00955	HACL1	4.06805	NPC2	4.35088	VBP1	4.54245
782	PCBD1	5.48041	PGM1	3.92725	HMCES	5.00863	MOB2	4.06798	SOX3	4.35025	PHF10	4.53998
783	TMEM219	5.48034	DBNL	3.92583	BEND6	5.00797	TICAM1	4.06732	CCR5	4.34905	EIF4EBP1	4.53948
784	ORC6	5.47438	GDF10	3.92577	TPRXL	5.00642	MPPED1	4.06265	FKRP	4.34657	TRMT12	4.5377
785	GGCT	5.47347	BCAS2	3.92328	HRH2	5.00531	IDH3G	4.06236	RB1	4.34637	ALDH9A1	4.5358
786	PTPRZ1	5.4723	SPATA1	3.92262	ZNF655	5.00507	PIH1D1	4.06174	RPL38	4.34619	SIPA1	4.53537
787	S1PR1	5.47157	FZR1	3.92147	PNPO	5.00463	TPST2	4.05927	CXCL14	4.34557	CRYZL2P	4.53453
788	GLUD1	5.47053	LINC02217	3.92127	INA	5.00138	MS4A15	4.05811	TMEM258	4.34371	FGF2	4.53281
789	LINC00320	5.46983	LOC285097	3.91775	PLK5	4.99892	RPS6KB1	4.05791	PLEKHB1	4.3385	CCDC112	4.53086
790	PSMG3-AS1	5.46874	TRMT112	3.91767	EIF2S3	4.9964	TSC22D3	4.05762	WNT10B	4.33848	ZFP64	4.52993
791	ACY3	5.4687	DIAPH3	3.91388	TNNC2	4.99547	RAP2A	4.05549	NPHS1	4.33822	SLCO1C1	4.52693
792	TEAD1	5.46862	SC5D	3.9118	KIFC2	4.99491	SAMD4B	4.054	LINC00484	4.33494	ARHGAP28	4.52652
793	PELI1	5.46741	STARD3NL	3.91176	RRM2B	4.99444	FAM171A1	4.05342	CA11	4.33345	CENPW	4.52468
794	RPS19	5.46363	AMN1	3.91067	TAZ	4.99362	CTSF	4.05275	TNFRSF14	4.3331	SNRPD3	4.5238
795	UBE2Z	5.46152	BCKDK	3.91059	TRMT44	4.99328	MMACHC	4.05225	RAB27B	4.33086	RTRAF	4.52265
796	TKFC	5.46096	NSDHL	3.90969	ZNRD1	4.99209	MKX	4.0497	STX7	4.32948	GAR1	4.52149
797	CREG1	5.45854	C1QA	3.9053	SLC22A5	4.99158	ELMO3	4.04964	MBNL3	4.32796	PXMP4	4.52133
798	RASGEF1C	5.4568	SIDT2	3.90413	SYBU	4.9913	GPR63	4.04877	GXYLT2	4.32709	P2RY1	4.52068
799	CSF1R	5.45329	SFRP1	3.90387	RBM48	4.98588	SEC13	4.0485	FZD1	4.32641	GGCX	4.51829
800	NUDT11	5.45313	LMO3	3.90239	TMEM267	4.98534	TP53TG3D	4.04828	PNMA8A	4.32428	KLK5	4.51422
801	CSGALNACT1	5.45279	TMEM196	3.90223	TUBE1	4.98238	HSPA12B	4.04816	MMD	4.32416	YPEL1	4.51208
802	YJEFN3	5.45001	MORN4	3.90042	VPS36	4.97984	SENP2	4.04789	PIK3CD	4.31985	CERS1	4.51075
803	PPDPF	5.44704	MIF	3.89421	RALGAPA2	4.97956	WBP2	4.04606	AKAP8	4.3191	2008-03-01	4.50519
804	CFAP70	5.44696	KLHDC4	3.89267	KRBA1	4.97937	SMYD2	4.04593	CENPW	4.31668	BCKDK	4.50432
805	PSENEN	5.4468	SERF2	3.89191	NTM	4.97888	MX1	4.04037	PPP2R5A	4.31349	FAU	4.50429
806	EMID1	5.44324	ARMCX1	3.89169	COBLL1	4.97867	BTBD10	4.04012	KLHDC8B	4.31066	TRIM68	4.50354
807	LINC02381	5.44248	NUBPL	3.8915	PTPN4	4.97696	MGST3	4.03848	TRMT112	4.31051	INPP5K	4.50309
808	PLEKHA7	5.44173	ACKR3	3.89082	SETD7	4.97655	SCN4B	4.03845	L3MBTL4	4.30956	SCN9A	4.50228
809	IARS2	5.43826	TRUB1	3.88952	DND1	4.97561	TOR1AIP2	4.03831	RPL37	4.30925	RYR1	4.50052
810	MRPL30	5.43773	PCBP3	3.88903	STAC2	4.97371	MROH1	4.03642	WFS1	4.30912	EFHC2	4.50045
811	COMMD6	5.43687	VPS37C	3.88827	PYROXD1	4.97363	CPSF3	4.03591	SEC61A2	4.30615	TMEM159	4.50021
812	GXYLT2	5.43305	CALD1	3.8874	MAGI2-AS3	4.97312	NUDCD2	4.03396	RTRAF	4.30505	ADM5	4.49852
813	ANO3	5.4313	CCNYL1	3.8857	YTHDC2	4.97074	IGSF21	4.0335	NPAS3	4.30498	OAZ3	4.49828
814	EPOP	5.4281	PCCB	3.8842	C9orf72	4.96762	WNT10A	4.03278	OAZ3	4.30378	ID4	4.498
815	PLAC9	5.42404	APMAP	3.88387	KCNA1	4.96743	MYC	4.03026	SST	4.30279	TRIM22	4.49761
816	DERL2	5.4217	TUFM	3.88067	IPW	4.96518	MFF	4.02875	DHRS4	4.30122	ADHFE1	4.49654
817	FCGBP	5.42115	PPP2R2A	3.87858	FASTK	4.96438	PSMG1	4.02872	GTF2H5	4.29587	ACAT2	4.49197
818	RPL26	5.41824	UBB	3.87843	KBTBD8	4.9636	MRPS22	4.02778	CDC42EP4	4.29436	RILPL2	4.48948
819	IL17RB	5.41627	PTP4A1	3.87706	ITGA2B	4.96167	ALDH1B1	4.02716	RPL13	4.29282	GSTM2	4.48369
820	CCNH	5.41354	KLK5	3.87646	ACSL6	4.95978	APOL2	4.02667	COMMD6	4.29201	RPL38	4.48097
821	STON2	5.41171	TMEM150C	3.87572	LOC220729	4.95891	HSPB3	4.02535	CALD1	4.2915	FAT1	4.48079
822	CDC42EP4	5.41062	FTL	3.87489	HSPA14	4.95674	PCDH12	4.02486	FAT1	4.28992	ROM1	4.47998
823	CD81	5.41031	ALDH2	3.87398	RAD52	4.95376	YIPF2	4.02477	TG	4.2899	LINC02076	4.47873
824	ESD	5.40558	GMIP	3.87136	ASAH2	4.95195	MADD	4.02439	TMEM106A	4.28933	MAST3	4.47759
825	TUBB8P12	5.40382	EIF1AY	3.8697	SRSF1	4.95043	PRELID3B	4.02398	LINC01140	4.28759	ALG5	4.4756
826	MYRIP	5.40276	RAB31	3.86933	MBL1P	4.94596	IMP3	4.02169	RBBP7	4.28636	GABARAP	4.4743
827	B4GALT1	5.39856	PHB	3.86827	SLC39A14	4.94589	TMEM203	4.02007	LIX1L	4.28395	LOC100506271	4.47352
828	CISD3	5.39849	HBG1	3.86533	SLC39A13	4.94206	NDUFS3	4.01999	SERPINB8	4.28265	TMEM18	4.47285
829	DNAAF4	5.39521	CAPNS1	3.86487	TDP2	4.94135	SLC20A1	4.01729	P2RY6	4.28261	SRP19	4.46953
830	GABRA3	5.39105	DNAJB2	3.86114	INPP5A	4.94053	FAM84B	4.0168	CRNDE	4.28072	RNF157-AS1	4.46847
831	LINC01485	5.3908	CDH11	3.86101	SORBS1	4.93981	PPP1CB	4.0155	HMOX1	4.27839	TRIB1	4.46551
832	TMEM42	5.38995	SPATA33	3.86048	ADD1	4.9396	RBM18	4.01402	JADE2	4.27759	WFDC1	4.46548
833	FCGR1B	5.38246	DOC2B	3.86011	ZFP69B	4.93871	PDCL3P4	4.0126	FBLN1	4.27712	C11orf1	4.46183
834	CETN2	5.38004	COPRS	3.85887	PDE4D	4.93827	TUBGCP5	4.01044	DDX54	4.27695	PRAF2	4.46144
835	RTBDN	5.37591	MAPK8IP1P2	3.85794	ASAH2B	4.93823	FLAD1	4.00795	PON3	4.27535	PDE2A	4.46098
836	CCR5	5.37419	PSME1	3.85626	SLC38A2	4.93795	CASQ1	4.0072	ANAPC11	4.27404	TMEM47	4.46008
837	KLRC1	5.37329	ALG5	3.85423	RCN3	4.93676	MXRA7	4.0065	CHRNB1	4.27294	LYPD2	4.45907
838	RAB36	5.37093	COL5A3	3.85337	ZNF12	4.93655	ASNA1	4.00578	CSGALNACT1	4.26997	ZNF229	4.45891
839	CHCHD6	5.37056	TP53BP2	3.85102	LMBR1	4.93645	RHEB	4.00526	ANKRD50	4.26781	SAR1A	4.45808
840	ACSM5	5.36724	ZNF622	3.85007	KCNB1	4.93631	SEMA4D	4.00362	SLC2A12	4.26516	NALT1	4.45491
841	2008-03-01	5.36585	CNMD	3.84935	KCNA2	4.93611	NAP1L2	4.00322	GPRIN2	4.26425	RPL26	4.45468
842	PIPSL	5.36524	NUDT18	3.84721	KIAA1614	4.93463	LOC100132831	4.00274	TNFRSF13C	4.26298	RPL35A	4.45022
843	DYNLL1	5.36128	GPKOW	3.84702	MIB2	4.92735	SPG7	3.99991	TM7SF2	4.2626	PPM1M	4.44742
844	ROM1	5.36046	ZMYND12	3.84485	RNF168	4.92716	MROH5	3.99922	FGD3	4.26258	SDK2	4.44351
845	FAM110C	5.35712	RAC1	3.84376	DPY19L2P4	4.92696	CRAT	3.99782	TDRKH	4.26245	SNRPC	4.43828
846	PTGER4	5.35368	PSMC3	3.84364	LRRC38	4.91755	CALHM1	3.99763	TRIL	4.26018	RNF150	4.43783
847	LRRC36	5.35161	SIPA1	3.84329	FLYWCH2	4.91126	ACTA1	3.99713	OARD1	4.25833	CLPB	4.43535
848	IDNK	5.35018	PPDPF	3.84002	PNISR	4.90768	SLC43A2	3.99272	DIO2	4.25593	SNRNP27	4.43521
849	SYF2	5.34769	CCDC102B	3.83719	DENND4C	4.90601	PHLDA3	3.9919	KLRC1	4.25562	RPS21	4.43173
850	SSR4	5.3455	GPR34	3.83702	PPIEL	4.90598	TSR1	3.99178	SSC4D	4.25448	SYF2	4.43158
851	A1BG	5.34504	CD2BP2	3.83621	ZNF767P	4.90519	MBOAT1	3.98887	CYP26A1	4.25279	PPEF1	4.42945
852	RPL31	5.34153	VEZT	3.83571	GPHN	4.90495	BICDL2	3.98616	UHMK1	4.25183	ANKRD50	4.42414
853	GASAL1	5.3415	ROBO1	3.83319	SLC6A17	4.90445	FBXW5	3.9861	IQCA1	4.25133	ADIRF	4.42406
854	PTGER3	5.34102	TLR2	3.83298	HDAC7	4.903	SLC1A1	3.98454	CXCR4	4.2511	TRIM24	4.42204
855	RNF157-AS1	5.33864	PERM1	3.83232	LEMD3	4.90237	ATG4D	3.98399	P2RY1	4.24068	CYP4V2	4.42004
856	ME1	5.33856	FAM107A	3.82865	INPP5B	4.90159	CHRNA4	3.98354	ORC6	4.23941	SEMA4A	4.41842
857	RHOJ	5.33716	ADGRG1	3.82777	ATP1A4	4.90077	NDUFA8	3.98237	KLF6	4.23853	RPS27	4.41674
858	CNDP2	5.33584	CCDC103	3.82693	HDAC8	4.90036	MRPS14	3.9817	BAALC	4.23684	IL3RA	4.41554
859	HRASLS	5.33443	PLTP	3.82568	THEM4	4.89663	LRRC75A	3.98143	LOC440934	4.23651	RB1	4.41388
860	DRAIC	5.33434	TRIP6	3.82552	TRNP1	4.8956	LINC01260	3.98087	GBA	4.23582	C1S	4.40871
861	PRR5	5.33228	TMEM126A	3.82502	SLK	4.89501	LCE3C	3.9774	SIPA1	4.23477	SIGLEC11	4.4085
862	PRMT2	5.332	TRO	3.82362	BRD2	4.89329	SRXN1	3.97308	NUDT14	4.23439	SFT2D1	4.40848
863	SH3GL3	5.32862	TPI1P2	3.82292	USP13	4.89191	TOX2	3.96991	SSR4P1	4.2341	FILIP1	4.40839
864	TBC1D24	5.32855	ADRA2C	3.82254	SLC12A5	4.89164	COL6A1	3.96873	SAR1A	4.2324	OLFML3	4.4062
865	COG1	5.32823	USP9X	3.82121	SLC22A23	4.88822	C21orf33	3.96383	GLRA3	4.23155	GPR143	4.40553
866	HSP90B1	5.32748	MIR99AHG	3.82061	SLC25A34	4.88718	ACTR6	3.9619	ECH1	4.22951	TBC1D24	4.4029
867	PNCK	5.31725	ACAT2	3.82016	POU2F2	4.88363	BOLA3	3.96136	RNF150	4.22711	FZD2	4.40274
868	NT5DC3	5.31705	CARHSP1	3.82009	RFPL2	4.88338	NUBP1	3.96085	SEC11C	4.22518	KCNG1	4.40136
869	ATP6V1C1	5.31515	RAET1E-AS1	3.81883	TMEM170B	4.88219	ANXA4	3.95894	KLK7	4.22422	FAR2P1	4.39994
870	ZNF572	5.31313	LPCAT2	3.8186	CDC42EP3	4.87998	RNF214	3.95864	CTXN1	4.22372	SGCD	4.39928
871	ZCCHC12	5.30922	PSMG3-AS1	3.8122	RYR2	4.8788	PLA2G7	3.9582	FLVCR1-AS1	4.22037	MBOAT2	4.3977
872	LOC101928370	5.30797	VAMP8	3.8116	RNF157	4.87702	NIF3L1	3.95722	TRIM24	4.21944	NANOS1	4.39618
873	C1orf226	5.30394	FIS1	3.81097	PCDH7	4.87652	BVES	3.95721	BCAN	4.21931	GPRIN2	4.39515
874	TUFM	5.30317	FGFBP3	3.81095	MOK	4.87445	HIF1AN	3.95688	STOX1	4.21808	RHOC	4.39499
875	NELFE	5.30252	CBR1	3.81059	ITPR1	4.87427	PIGK	3.95649	CISD3	4.21759	TMEM218	4.39375
876	UHMK1	5.30239	CRHBP	3.80936	ZNF493	4.87346	LINC01116	3.95473	SLC29A3	4.2153	CRYZL1	4.39239
877	MRC1	5.29807	MOB1B	3.80893	MATK	4.87049	TCHH	3.9538	RTL8A	4.21077	SST	4.39123
878	C19orf70	5.29668	RPL7A	3.80805	CSDC2	4.86926	CA13	3.95361	MZT2A	4.20936	PAXBP1-AS1	4.38927
879	STX12	5.2957	SOX3	3.80757	MTUS2	4.86616	SNAP25	3.95293	FGF2	4.20725	POC1A	4.38768
880	SP5	5.29531	LINC01736	3.80725	PRDM2	4.8634	PPP1R3B	3.95284	TMEM8A	4.20675	NOTCH2	4.38511
881	RHBDD2	5.29299	B3GNT5	3.8068	OGDHL	4.86142	SPRYD3	3.952	CNDP2	4.20344	ENKUR	4.37945
882	DYNLT1	5.29226	PRELID1	3.80545	KLHL20	4.85525	GRIA3	3.95055	SLCO1C1	4.20336	FERMT2	4.37845
883	CYTH4	5.29182	FGGY	3.80538	ARID2	4.85469	ZNF564	3.94655	RLBP1	4.20317	CALML3	4.37836
884	VSIG4	5.29019	CBFB	3.80521	NDUFC1	4.85319	MEIS3P1	3.94625	TCF7L1	4.20265	FAM181A	4.37603
885	SST	5.29015	LRP1B	3.80411	NRDE2	4.85017	LYPD6	3.94342	PHLDB3	4.2018	KLRC3	4.37541
886	ISG15	5.2868	ZSCAN5A	3.80372	WDR90	4.84804	BDH1	3.94338	GATB	4.19957	CMTM8	4.3746
887	UBE2L5	5.28647	IL33	3.80299	MPHOSPH9	4.84613	SORL1	3.94268	HLA-DRB4	4.19914	RPL36A	4.36702
888	FAM71F1	5.28591	GSS	3.80188	PCGF1	4.84519	LYRM7	3.94124	SNRPD3	4.19869	C12orf75	4.36461
889	PTGR2	5.28376	ITGB2	3.80027	FGF17	4.83785	TNFSF4	3.94109	RASL10A	4.19611	ATP6V1C1	4.36391
890	C1S	5.28355	RPS2P32	3.79975	DFFB	4.83737	SELENOH	3.94094	PGM2L1	4.19462	TMEM187	4.36222
891	RILPL1	5.28125	DLEU1	3.79971	CS	4.83627	SNX33	3.93882	PTGR2	4.19455	PKIA	4.3612
892	RPL10A	5.27599	SNHG8	3.79876	KLF12	4.83585	C11orf49	3.93419	SCGN	4.19386	DPYD	4.36088
893	LOC729970	5.27439	FCGR3A	3.7983	GPR137C	4.83365	ATAD2	3.93288	PEX19	4.19318	LMAN2L	4.35936
894	MYADM	5.27355	NFKBIE	3.79791	ZCCHC3	4.83298	SMUG1	3.92931	NTNG2	4.19153	UBE2L5	4.35266
895	ZFAND3	5.2733	EMID1	3.79758	AGO1	4.83126	FLJ33534	3.92893	KCNG1	4.19079	FCGR2A	4.35206
896	WDR6	5.27325	CYTL1	3.79658	LEPROTL1	4.82979	SPAG9	3.92762	B4GALT1	4.18851	P2RY6	4.35177
897	LINC01140	5.27297	MAP7D1	3.79653	ADGRL4	4.82939	HOMER1	3.92656	HDGFL3	4.1876	2001-03-01	4.34831
898	STOML1	5.27161	RIPK2	3.79531	EYA4	4.82913	AP2M1	3.92416	IFT22	4.18571	CHST9	4.34747
899	DDRGK1	5.27103	DNAH5	3.7943	SOAT1	4.82884	NUDT22	3.92352	MYO1F	4.18538	POLR2J	4.34715
900	DOLPP1	5.27016	POLR2L	3.79421	IQUB	4.82871	MAGEL2	3.92331	SH3GLB2	4.18403	FOXN3-AS1	4.34662
901	RPS12	5.2682	NDP	3.7941	SACM1L	4.82866	MRPS9	3.92215	FOXN3-AS1	4.18256	LOC100507351	4.34399
902	SEC63	5.26398	ARHGDIB	3.79241	CCDC184	4.82786	KEAP1	3.92198	RPL36A	4.17964	KLHDC8B	4.34175
903	TRIM68	5.2639	MYO1F	3.78991	SRFBP1	4.82594	FGR	3.92075	NSUN6	4.17678	SSC4D	4.34153
904	NPC2	5.26167	LINC00484	3.78745	ATP2B3	4.8239	RETREG3	3.91982	MIR7-3HG	4.17675	TM2D3	4.33846
905	CERS1	5.25902	SERPINB8	3.78649	C6orf47	4.82015	IFIT5	3.91847	DACT3	4.17675	SLC16A8	4.33763
906	DAPL1	5.25778	CNIH2	3.78605	SIKE1	4.81949	ASB2	3.91803	SERP1	4.17566	PEX19	4.33697
907	TG	5.25688	RFLNB	3.78468	SHD	4.81722	WNT6	3.91666	PIR	4.17499	WDR31	4.33661
908	MYO10	5.25036	CIB1	3.78352	ZNF773	4.81578	VPS72	3.91618	TMEM59	4.17488	ARL10	4.33618
909	ADAM28	5.24906	KLF8	3.78207	LMTK3	4.81073	EMC3	3.91616	GSTM3	4.1734	RIPK2	4.33347
910	PNPLA3	5.24672	RNF187	3.78116	IPO7	4.80996	ELOC	3.91604	AKR7L	4.17293	CORO1A	4.33142
911	ACKR3	5.24618	GPS1	3.78075	CLGN	4.80702	KLHDC2	3.91226	SLC7A4	4.17116	RNF135	4.33014
912	ST6GALNAC5	5.24509	VBP1	3.77997	PER1	4.8056	KCNA2	3.91148	CD84	4.16944	PHF13	4.32858
913	CNIH2	5.24128	GLRA3	3.77951	ARHGAP10	4.8037	HIVEP1	3.91121	DYNLT1	4.16768	SIVA1	4.32771
914	CXCR4	5.23914	PHACTR3	3.77895	ADCY1	4.80363	ASGR1	3.90988	DIRC2	4.16758	EEF1A1	4.32755
915	SLC40A1	5.23616	IL4I1	3.7785	MAPKBP1	4.80263	CLIP2	3.90896	NBAS	4.16742	TBCB	4.32743
916	PYDC1	5.23231	ARHGAP1	3.77764	PRB4	4.80168	SRP14-AS1	3.90674	STK25	4.16721	STON2	4.32687
917	F12	5.23058	PLAC9	3.77703	STX1B	4.79914	APOO	3.90581	PSMB7	4.16652	TMEM150C	4.32585
918	FDFT1	5.22977	CHMP4B	3.77648	IGF2BP3	4.79884	HOXD1	3.90207	RPL19	4.16535	STAG3	4.32572
919	TNFAIP2	5.22378	SRP9	3.77492	PRC1	4.79668	MTX1	3.90152	KRT83	4.16288	L3MBTL4	4.32552
920	SPPL3	5.22367	STOML1	3.77406	ZNF398	4.79622	SPOPL	3.8997	MCRIP1	4.16281	ST6GALNAC6	4.3253
921	RPL19	5.21992	CREB3	3.77136	KPNA5	4.79554	WDR24	3.89901	GSTM2	4.16247	TTC38	4.32044
922	PTPRC	5.21834	CENPF	3.76963	GK3P	4.79526	TMEM44	3.89775	POLE4	4.15728	NECAB2	4.32023
923	SLIRP	5.21825	ENOPH1	3.76403	ISCA1	4.79526	ADCK2	3.8972	SERHL2	4.14913	CNR1	4.31977
924	PSD3	5.21735	LCMT1	3.76341	OPRL1	4.79411	TIGAR	3.8947	CTSO	4.14762	SLC27A5	4.31927
925	IDH1-AS1	5.21681	RNF150	3.76064	2006-09-01	4.79398	SLC10A3	3.89278	ZNF826P	4.14656	C1orf226	4.31897
926	FARP1	5.21507	COPS9	3.75979	EPB41L5	4.79082	STAC2	3.89276	NOP56	4.1465	ZFP69	4.31797
927	C22orf23	5.21428	PSMA5	3.75783	VPS11	4.78826	SYNPO2	3.89001	STK17A	4.14471	ADCY7	4.31729
928	FERMT2	5.21326	HLA-DMB	3.75541	AHI1	4.7838	ABHD8	3.88999	URB1-AS1	4.14438	RPL23AP7	4.31694
929	KCNG1	5.21176	TLR3	3.75262	PLXNA4	4.77799	RUFY2	3.88984	DDX58	4.14343	CTXN1	4.31651
930	ZMAT1	5.21078	TMEM219	3.75164	MANSC1	4.77679	PRDX3	3.88942	SIRPA	4.14324	SDF2L1	4.31593
931	FILIP1	5.20963	OARD1	3.75087	DOT1L	4.77467	PAQR8	3.88795	ST6GAL1	4.14042	PCOTH	4.31535
932	ISOC1	5.20649	PLD3	3.7501	ZBTB34	4.77376	NDFIP2	3.88567	STX1A	4.14026	LOC440934	4.31413
933	CCT5	5.20435	COMMD9	3.74971	CCNO	4.76965	TBC1D12	3.88543	HAVCR2	4.13961	ADAMTS19	4.31406
934	MZT2B	5.2034	ALOX5AP	3.74607	PPARGC1A	4.76899	UGCG	3.88506	ZNF572	4.13921	SAP30BP	4.3131
935	GABBR1	5.20045	SYNGR3	3.74312	MIS18A	4.76838	LIMK1	3.88483	IARS2	4.13882	DSEL	4.3089
936	BCKDHB	5.19831	IGF1	3.74036	ZNF500	4.76583	RHOBTB2	3.88415	ERICH6-AS1	4.13703	CFAP70	4.30568
937	HLA-DRB4	5.19616	ANGPTL4	3.73946	SCAI	4.76511	HEMK1	3.88394	CPNE5	4.1363	SFMBT2	4.30431
938	C17orf67	5.19012	SNX7	3.73941	FAM20A	4.75634	MAGED2	3.88352	PHGDH	4.13574	ALPL	4.30309
939	BRD7	5.18689	CNN3	3.7387	FBXL12	4.75595	ITGA8	3.88224	RPL23AP7	4.13513	USP12	4.30061
940	RPS15	5.18689	AKR1C3	3.7377	NDUFAF7	4.75453	MLST8	3.87916	VSTM2L	4.13323	RGL3	4.29947
941	CORO1A	5.18655	FN3KRP	3.73461	OGFOD2	4.75309	FBXO25	3.87839	KLHDC4	4.13243	ENDOU	4.29856
942	SERF2	5.1853	BCKDHB	3.7328	CAMTA1	4.75236	LOC100286906	3.87061	ARNT2	4.13126	ARNT2	4.2946
943	CALB2	5.18347	COLGALT2	3.73068	FAM106A	4.75206	MCHR1	3.87057	NAGK	4.13106	SPTSSA	4.29162
944	DACT1	5.18168	TSR3	3.72912	LAT	4.75201	CTSV	3.87002	CERS1	4.12976	PHGDH	4.28948
945	GALM	5.1812	CD99	3.72896	GPATCH8	4.75191	FAM98A	3.86978	GPRIN1	4.12936	HSD17B14	4.28883
946	TMEM230	5.18111	MRFAP1	3.72707	LRRC37A4P	4.75173	ZNF284	3.86895	PEMT	4.12818	FZD9	4.2882
947	ABHD1	5.18056	MFAP1	3.72596	ZMYM4	4.74864	CLPTM1	3.8655	CCDC8	4.12795	LOC105373383	4.28479
948	ST6GAL1	5.17962	ADORA2B	3.72431	LOC652276	4.74585	BEX5	3.86455	C1orf194	4.12742	RIPOR2	4.27923
949	CELF5	5.17908	RILPL1	3.72426	TRPM2	4.7453	PDCD6IP	3.86304	TRIM22	4.12665	SEMA4F	4.27856
950	AGA	5.17843	BIRC3	3.72401	CMPK1	4.74444	STAU2	3.86304	RILPL1	4.12504	CCZ1P-OR7E38P	4.27642
951	SIPA1	5.1745	MOSPD2	3.7226	DPP8	4.74431	MAN2A1	3.86242	TRIB1	4.12129	RPS15A	4.27408
952	NOV	5.174	WDFY4	3.72109	XYLT2	4.744	LDHB	3.86213	NANOS1	4.11782	UBXN8	4.27395
953	ALDH2	5.17305	RILPL2	3.72062	FBXO32	4.74247	POLDIP2	3.86141	CA10	4.11692	HEY2	4.27124
954	PPIL6	5.17242	CHRNA4	3.7178	LOC389834	4.74101	KIF17	3.85906	SF3B6	4.11608	PNMT	4.26825
955	STX7	5.1705	AKR7L	3.71763	PTX3	4.74001	ARHGEF4	3.85891	SOX11	4.11528	SCPEP1	4.26273
956	ALG5	5.17049	RAB10	3.7164	PKD1P6-NPIPP1	4.73685	CTXN2	3.85797	EIF3H	4.11352	SLC4A4	4.26243
957	MEIS3	5.17014	NETO2	3.71122	SERTAD4-AS1	4.73671	LAGE3	3.8569	TEK	4.10989	URB1-AS1	4.26154
958	FAM129B	5.16942	FZD1	3.70911	BTBD11	4.73612	LRRC8B	3.85559	SEC63	4.10903	EHBP1L1	4.25689
959	CEP83	5.1687	HSPB3	3.70877	ACD	4.73415	GPATCH4	3.85462	DHCR7	4.10902	MZT2A	4.25645
960	TUBB2A	5.16105	DAPL1	3.70836	ULK3	4.73192	HACE1	3.85461	SNRPC	4.10754	C19orf70	4.25241
961	SLC25A22	5.16031	SPON2	3.70764	MTFP1	4.7313	SBNO1	3.85436	WDR31	4.10711	WNT10B	4.2485
962	CAP1	5.16008	VAT1	3.70661	KLHL34	4.729	SQSTM1	3.85394	MILR1	4.10682	TNNT1	4.24798
963	SSC4D	5.15947	DRAM1	3.7064	CNTNAP5	4.72891	STOML2	3.85276	SLC27A5	4.10473	RBBP7	4.24291
964	MNDA	5.15445	HCST	3.69992	CAMK2G	4.72798	STAT6	3.85241	RHCG	4.09875	HIST1H2BI	4.24286
965	SMAD2	5.15064	SLC26A4	3.69977	PASK	4.72797	PITPNB	3.85136	RTN4RL2	4.09796	TNFAIP2	4.24256
966	DOK6	5.14977	PDHB	3.69963	PXYLP1	4.7278	RNF4	3.84846	FDPS	4.09778	IL13RA2	4.24197
967	IGSF11	5.14929	GPR143	3.69895	TRIM44	4.72712	WAC	3.84687	PLPPR1	4.09615	ANO2	4.24168
968	IL4I1	5.14746	ACOT8	3.69684	ZNF540	4.72512	NECAB1	3.84602	CRYZL1	4.09498	DNAH12	4.24138
969	CHMP1A	5.14692	PHGDH	3.69512	ZNF542P	4.72483	TBC1D9B	3.84561	TEAD1	4.0908	STOX1	4.23936
970	NECTIN2	5.14684	ZNF219	3.69345	TDRD6	4.72434	KAT7	3.8449	PTRH2	4.09021	SERP1	4.23712
971	NR2E1	5.14664	CXCR4	3.69205	TMEM38A	4.72248	GBF1	3.84448	LINC00461	4.08837	GSTM3	4.2354
972	IGSF22	5.14376	FADS1	3.68825	MCF2L2	4.72149	RPP40	3.84325	ODC1	4.08776	MDGA1	4.23459
973	WASHC3	5.1402	FTHL17	3.6858	FAM57B	4.71766	TIMM23	3.84244	PDE2A	4.08507	AP2B1	4.2345
974	SIGIRR	5.1385	PTRHD1	3.68312	SLC38A1	4.71687	MAP1B	3.84127	RPS26	4.08478	OPRM1	4.23335
975	TRIM22	5.13832	TMEM9	3.68248	ARHGAP9	4.71648	COL4A4	3.84035	GNAQ	4.08363	TSTD1	4.23296
976	TMEM18	5.13832	FAM149A	3.68196	NKX3-1	4.71628	BCL11B	3.83814	ZMYND15	4.08312	STK25	4.23189
977	APTR	5.13605	UBE2S	3.68086	JAK1	4.71572	TOX4	3.83808	COMT	4.0808	PLPPR1	4.23187
978	FAM212A	5.13367	GCLC	3.67925	FKBP5	4.71464	GPR158	3.83706	LOXL1	4.07763	MYOM1	4.22448
979	MDGA1	5.13161	NDUFA13	3.67879	RSAD2	4.71425	NDUFB2	3.83682	S100B	4.0758	GPM6A	4.22395
980	HMGCL	5.12669	KCNA5	3.67743	KLC2	4.71186	ELAVL2	3.836	SNX22	4.07546	MEIS3	4.22387
981	FXYD1	5.12655	BAD	3.67628	ADCY3	4.71006	VAPB	3.83351	BYSL	4.07364	SF3B3	4.22364
982	PCDH19	5.12633	VPS26B	3.67552	CELF2	4.70988	UBC	3.8335	UBE2A	4.07323	SYN2	4.22245
983	APOPT1	5.12608	LIX1	3.67516	TRHDE	4.70921	E2F4	3.83184	CRB1	4.07301	HES1	4.22023
984	BDH2	5.12538	COQ5	3.67473	DDX46	4.70726	HDAC11	3.83146	OAF	4.0714	HHLA3	4.21967
985	SOX3	5.12288	DVL1	3.67331	RBBP8	4.70609	C2orf27A	3.83097	SLC39A11	4.0697	VAT1	4.21604
986	C1orf194	5.12165	ANG	3.67241	GUCA2B	4.7058	ANAPC7	3.83055	GLUD2	4.06885	WLS	4.21561
987	MTA3	5.12129	TOMM6	3.66845	FBLN7	4.70393	GCHFR	3.82959	NT5DC2	4.0674	LEPROT	4.2154
988	LGALS9C	5.12119	MDK	3.66633	TOR2A	4.70385	FAM69B	3.82899	TRAM1L1	4.06558	MLNR	4.21343
989	TTC38	5.11656	NT5DC2	3.66473	DRP2	4.69877	RNF175	3.82826	ALPL	4.06343	KCNMB1	4.20877
990	FRA10AC1	5.11627	2001-03-01	3.66452	ASPDH	4.69826	HPF1	3.82811	HBM	4.06319	SCUBE2	4.20805
991	KLRC3	5.11467	TMEM136	3.66253	HIST4H4	4.69808	SLC29A2	3.82611	UBE2S	4.0631	PLEKHO2	4.20759
992	CALD1	5.11132	MPV17	3.66165	NAPA	4.69712	CELF2	3.82536	MRPS16	4.06277	COMT	4.20641
993	ZNF350	5.10821	ALOX5	3.66068	FSBP	4.6961	SUPT5H	3.82439	FZD2	4.06091	RAB34	4.20483
994	TRIM27	5.10741	CFL1P1	3.65967	USP9Y	4.69588	PAIP2	3.82339	S1PR1	4.06012	SMOC1	4.20402
995	SLC2A5	5.10607	ATP5PB	3.6584	NOB1	4.69411	KCNH6	3.82314	RBX1	4.05585	SSR4P1	4.20155
996	PHGDH	5.10588	NXT2	3.65815	FAM210B	4.684	NDUFA6	3.82125	NECAB2	4.05427	FANCL	4.20146
997	GPSM1	5.10501	FBLN1	3.65758	PLEKHA8	4.68178	MED31	3.82088	RIPOR2	4.05351	UBE2S	4.19766
998	CPAMD8	5.10249	GRIK3	3.65675	LOC441455	4.68057	PLEKHA1	3.81896	SNHG8	4.053	CRNDE	4.19665
999	TMED10	5.10186	MT1F	3.65661	MPP7	4.67739	FAM86HP	3.81829	CRLF1	4.05224	EEF1B2	4.19637
1000	ZMAT2	5.09928	BEX3	3.65625	FAM222B	4.67722	FDX1	3.81542	TSTD1	4.05013	SNRPG	4.19584
1001	HGF	5.09393	RNF5P1	3.65555	SECISBP2	4.67234	NR2F6	3.81536	YPEL1	4.04976	IFT22	4.195
1002	SSPN	5.09264	CFAP52	3.65529	FZD4	4.6698	AATF	3.81507	FAR2P1	4.04344	FAM171B	4.19466
1003	GNB2	5.09094	EIF2S2	3.65419	ANKMY2	4.66897	RAD23A	3.81187	RNF167	4.04163	RPL24	4.19463
1004	HRH1	5.08692	CA11	3.65013	EOGT	4.66791	DDX41	3.81152	TAPT1	4.04142	CARD17	4.19341
1005	SYN2	5.08588	ITGB1BP1	3.64966	EHBP1	4.66728	RCAN2	3.81079	SOWAHA	4.03908	YJEFN3	4.19042
1006	ZCRB1	5.08468	GLG1	3.64927	GRIN2A	4.66491	TMEM132C	3.80868	PSME2	4.03902	RPL13	4.18662
1007	TIMP1	5.08172	IL17RD	3.64865	PATJ	4.66469	SLC47A1	3.80629	DDIT4L	4.03787	UBE2A	4.17921
1008	LAT2	5.08108	PPM1M	3.64726	ZNF502	4.65683	PCSK1	3.80531	C1QL3	4.03657	IFI27L1	4.17564
1009	ZBTB44	5.08061	TIMM13	3.64595	ABTB2	4.65648	PIN1P1	3.8046	MPP2	4.03599	B4GALT2	4.17257
1010	NR1H3	5.08035	PXMP4	3.64567	SNTG1	4.65597	GATB	3.80444	MVD	4.03525	SAMD9L	4.17256
1011	SSBP1	5.07944	FERMT1	3.64564	KDF1	4.6485	MRPS18C	3.80314	NFKBIE	4.03381	RPS4X	4.17244
1012	GPR183	5.07872	KLRC3	3.64499	FAM217B	4.64823	UBR4	3.80289	RPS3	4.0328	SMAD1	4.1651
1013	SF3B6	5.07762	UBA1	3.64463	ZNF8	4.64753	APH1A	3.80275	DENND1C	4.03262	FOXRED2	4.16416
1014	SRP19	5.07367	FAM207A	3.64373	PCDHB14	4.64668	TMEM60	3.80212	RTP1	4.03135	SCIN	4.16033
1015	C11orf65	5.07086	CPNE7	3.64309	HIST1H4A	4.6408	GP9	3.80159	NWD2	4.02923	HDGFL3	4.16006
1016	WDR31	5.07024	DCTN3	3.6414	TOP1P1	4.6365	GOLGA2	3.80037	SH3BP5	4.02693	LYPD1	4.1581
1017	C1QL3	5.06926	EFEMP2	3.64072	CAMK1D	4.63647	MRPL9	3.79901	NNAT	4.02538	FADS3	4.1581
1018	MDK	5.06293	SCRG1	3.63999	TAS2R14	4.63616	PPARGC1A	3.79837	NTSR1	4.0252	HCK	4.15483
1019	ITGB5	5.06291	ABCF1	3.6386	MSANTD2	4.63518	TTC5	3.79416	B4GALT2	4.0248	HLA-DRB5	4.15385
1020	PRELP	5.06287	RAD21	3.63655	ZNF454	4.63471	RDH11	3.79342	COL5A3	4.02427	COLCA1	4.15345
1021	LGI4	5.06141	C16orf74	3.63514	CFAP65	4.63178	PSAP	3.79218	SLIRP	4.02103	SNCA	4.15082
1022	SLN	5.06042	ADSL	3.63445	ROCK2	4.62938	PPIAL4A	3.79136	ANG	4.01908	BTNL9	4.14931
1023	IPO5P1	5.05902	STRADB	3.63399	CSNK1G3	4.62781	INPP5J	3.79069	VPS29	4.01847	FNBP1L	4.14772
1024	RTL8A	5.0589	RPL36AL	3.63374	ZNF791	4.62635	SLC20A2	3.78892	MPRIP	4.01768	PAMR1	4.14665
1025	CALU	5.05875	NAA10	3.63141	ETS1	4.62581	PI4KA	3.78829	VIT	4.0132	CRYL1	4.14362
1026	MBOAT2	5.05647	ZFYVE21	3.63128	ZNF669	4.62342	ATXN2	3.78649	ST6GALNAC6	4.00985	DDIT4L	4.14158
1027	AMZ1	5.05626	LINC01315	3.62933	PELI3	4.62314	KIAA0232	3.7863	RPL7A	4.00979	EYA2	4.14016
1028	TFEC	5.05409	SAMD4B	3.62918	LAMA4	4.6221	ZNF664	3.7862	YJEFN3	4.00911	CHDH	4.13872
1029	C20orf27	5.05282	S100B	3.6275	ST8SIA1	4.61992	FNTA	3.78583	JMJD7	4.00696	ITPRIPL2	4.13624
1030	RWDD3	5.0493	IL13RA1	3.62678	PVALB	4.61388	LOC105376360	3.78568	EYA2	4.00521	PIK3CD	4.13268
1031	ENKUR	5.04919	ATP9A	3.62564	RNF19B	4.61354	SLCO4A1	3.78548	ALDH9A1	4.00442	LINC00484	4.13054
1032	TSPOAP1	5.04892	ZSCAN18	3.62386	TENM2	4.61338	RAMP3	3.78492	ARFIP1	4.00261	ASH2L	4.12958
1033	C5	5.04646	SMOC1	3.61993	IGDCC3	4.60706	GDPD1	3.7846	VBP1	3.99897	GPRIN1	4.12815
1034	C12orf76	5.04603	LARGE1	3.61816	STAG1	4.60697	TOMM20	3.78458	PDHB	3.9971	APRT	4.12743
1035	INTS4	5.03964	USP12	3.61565	NPR2	4.60581	DHPS	3.78368	TMEM218	3.99541	TKFC	4.12586
1036	RAD21	5.03955	PHLDB3	3.61436	PDIK1L	4.6026	APOL1	3.78345	DERA	3.99421	IFI30	4.12291
1037	LOC100240735	5.03914	DNAH14	3.61429	CEP44	4.60237	CAMK1G	3.78307	RPS23	3.99404	CDC42BPB	4.12066
1038	RHOC	5.03289	RAB3C	3.61427	SPTBN4	4.60143	GNG3	3.78305	GNG5	3.99299	RPS11	4.12016
1039	RPL36A	5.03267	RGL1	3.61156	MEIKIN	4.6014	NAA20	3.78229	DCAF11	3.99241	HPCAL4	4.11935
1040	CXCL14	5.02887	ROMO1	3.61122	ZNF736	4.59815	CDKN3	3.78227	USP12	3.99149	BATF3	4.11756
1041	LINC02217	5.02855	CHST1	3.6109	OR2L8	4.59104	TAF13	3.78218	PDGFA	3.98809	C1orf194	4.11562
1042	SLC26A4-AS1	5.02734	PRELP	3.60487	HSPBAP1	4.5893	UTP4	3.7809	ADAM28	3.98788	PSME2	4.113
1043	ACOT8	5.02719	TRH	3.602	ARHGAP32	4.58718	TGS1	3.78032	HLA-DRB5	3.9863	ZDHHC12	4.11239
1044	NWD1	5.02419	RASAL3	3.60103	BTN2A1	4.58545	NREP	3.77963	BATF3	3.98567	LILRB4	4.10928
1045	DHRS4	5.02271	MSANTD1	3.59983	MINPP1	4.58532	KCNA1	3.7764	HGH1	3.98317	SEC11C	4.10887
1046	PMVK	5.02225	PSMB6	3.59915	AIFM3	4.58524	DHCR24	3.77619	TMED10P1	3.98284	COMMD6	4.10515
1047	IFI27L1	5.02116	LOC728715	3.59873	NAB1	4.58431	SPRY4	3.77585	MYO10	3.98229	CNPY2	4.10445
1048	AMZ2P1	5.01992	SCN3B	3.59867	ZNF570	4.58417	BAIAP2L2	3.77583	FPR1	3.98158	EIF3H	4.10278
1049	SPTSSA	5.01575	ALDOA	3.59736	ARL5B	4.5819	MRPS18A	3.77464	TMC8	3.9811	SH3BGRL3	4.10231
1050	PAAF1	5.01549	RPL10A	3.59421	CCER2	4.5789	ZBTB11	3.77317	MS4A7	3.98046	FBL	4.10212
1051	SLC2A12	5.01459	MUM1L1	3.59357	UTRN	4.57878	STMN2	3.77255	TRMT5	3.98015	EXOC6	4.1002
1052	MRPL20	5.01415	SSBP1	3.59246	SLC25A40	4.57872	DIRAS1	3.77202	GPSM1	3.97387	PCDH20	4.10017
1053	PTCHD1	5.01297	ACAT1	3.59129	ZNF142	4.57059	PRDX5	3.77111	ZFAND3	3.96781	DERA	4.09985
1054	HGH1	5.01282	SOX9-AS1	3.5905	HTR1F	4.56934	CLPX	3.77042	EMID1	3.96748	TMED10P1	4.09851
1055	DNALI1	5.0126	GNG5	3.59035	KRIT1	4.56933	PTP4A1	3.76926	SMAD3	3.96678	RAB40B	4.09763
1056	P2RY1	5.00919	TLDC1	3.5874	TRIM33	4.56135	FLOT1	3.76855	DLG2	3.96661	NHLRC1	4.09723
1057	DPYD	5.00889	PWP2	3.58523	WNT3	4.55874	RFLNB	3.76706	CCKBR	3.96078	IARS2	4.09607
1058	CREB3	5.00887	HINT1	3.58487	TRAF7	4.55779	PIN1	3.76666	MIEF1	3.95928	JARID2-AS1	4.09534
1059	BABAM2	5.00676	MLC1	3.58436	ST6GALNAC1	4.55623	TPK1	3.7666	UBL5	3.95725	ENOPH1	4.09
1060	TECPR2	5.00539	ADI1	3.58213	RBM14	4.55153	FAM234B	3.76633	SPACA9	3.95509	PTGER3	4.08963
1061	SMOC1	5.00295	GXYLT2	3.58212	RBAK	4.55133	CLTC	3.76571	CHCHD7	3.95111	NNAT	4.08739
1062	SOX5	4.99896	NOL4L	3.58061	FIZ1	4.54764	USP31	3.76367	SFMBT2	3.94854	OTOS	4.08718
1063	CRYL1	4.99803	L3MBTL4	3.58056	ELOVL4	4.54668	VGF	3.76363	FBXO25	3.94841	MYB	4.08696
1064	RGL3	4.9979	LIPA	3.58048	ARHGEF10L	4.54545	FRS3	3.7626	SLC2A4RG	3.94711	POLE4	4.0864
1065	SRRD	4.99742	NFATC1	3.58005	HAAO	4.54542	UBXN10	3.76152	RALA	3.94426	E2F3	4.08421
1066	RRAGC	4.99375	PAMR1	3.57963	HCN1	4.54515	OLA1	3.75771	LOC101928111	3.94141	KLK7	4.08267
1067	FAM117A	4.99103	MAP4	3.57826	SLC26A10	4.54474	TMEM196	3.75734	RPS6	3.94122	CHCHD5	4.08229
1068	SLC2A4RG	4.99043	ECHDC3	3.57776	STK26	4.5387	DDHD1	3.75563	CINP	3.94099	NEBL-AS1	4.08083
1069	FAR2P1	4.99034	TBC1D24	3.57604	MAP3K21	4.53618	EFNA5	3.75559	ISOC1	3.9385	STYK1	4.08005
1070	FDPS	4.98997	EIF3F	3.57586	DNAJB9	4.53471	IDH3B	3.75433	RNF157-AS1	3.93831	TG	4.07967
1071	RPL24	4.98629	RREB1	3.57586	HSBP1L1	4.53216	GABRD	3.75288	LMO3	3.9377	SMAD3	4.07664
1072	SLC27A5	4.98569	RAB27B	3.57528	PTTG2	4.53101	SPDEF	3.74862	RPL35A	3.9306	SNHG8	4.07588
1073	JMJD7	4.98505	ANXA4	3.57402	HNRNPA1L2	4.53022	ARHGAP9	3.74692	LGALS9C	3.92821	USP39	4.07447
1074	KLHDC8B	4.98137	SNRPG	3.57376	UBE2Q2	4.53015	SNX24	3.74542	RABIF	3.92661	BDH2	4.07387
1075	NNAT	4.98096	CCKBR	3.57333	BCL6B	4.52881	WDR61	3.74535	WIF1	3.92192	C11orf65	4.07158
1076	STARD3NL	4.97582	GGCX	3.57319	TAF1D	4.52773	RSL1D1	3.74511	AMZ2P1	3.92002	FTHL17	4.07137
1077	HSD17B14	4.97576	RPL9	3.57298	TMEM237	4.52756	FBXO22	3.74469	TTC38	3.91946	UBL5	4.0697
1078	ARHGAP28	4.97526	RBX1	3.57119	ODF2	4.52702	FIS1	3.74448	TKFC	3.91939	CPNE5	4.06829
1079	BMP7	4.97494	FABP5P3	3.57094	STXBP1	4.52431	YARS2	3.74366	ETNPPL	3.91927	LINC00461	4.06801
1080	RSPO3	4.97454	GATM	3.56964	CEND1	4.51898	SDHC	3.7409	CCT5	3.91926	ARPP19	4.06569
1081	ARHGAP31	4.97435	STK17B	3.56758	CCDC115	4.51826	RAB6B	3.73709	TIMM10	3.91766	TAC3	4.06534
1082	C11orf1	4.97157	RNASET2	3.56609	ZNF567	4.5172	ZFP1	3.73702	ANKLE2	3.91751	CD163	4.06527
1083	FAT1	4.97095	RPL26	3.56367	REL	4.51612	AURKA	3.73494	SYF2	3.91604	RPS3	4.06335
1084	SVOP	4.96955	RPL35	3.56291	GALR1	4.51573	TMEM62	3.73466	GPR183	3.91548	CDC14A	4.0632
1085	FUOM	4.96866	CDH9	3.56141	CDYL	4.51421	MIR100HG	3.73322	SMOC1	3.91536	LYRM9	4.06307
1086	DNAH12	4.9651	ADAP2	3.56039	MKNK2	4.5126	PTPRD-AS1	3.73305	CEP83	3.91516	ST6GAL1	4.06285
1087	CMTM8	4.96366	IGSF6	3.55781	SLC4A8	4.51229	CIDECP	3.72862	PPP4R4	3.91461	ESD	4.06259
1088	ANKRD50	4.96302	SPPL2A	3.55666	UBE2W	4.50948	SV2C	3.72772	CDC14A	3.91122	SLC30A10	4.0615
1089	SCUBE2	4.96167	DHDDS	3.55565	OCEL1	4.50798	TTC19	3.72728	PRMT2	3.911	DOCK7	4.05994
1090	COG5	4.95895	FAM212A	3.55526	ZNF251	4.50628	HGS	3.72715	PTGER3	3.91082	OTOF	4.05807
1091	NPTXR	4.95523	FGF2	3.55443	PHTF1	4.49918	MARS	3.72532	CPNE7	3.9081	NPHS1	4.05806
1092	DNAH14	4.95296	PEA15	3.5537	PPP1R15B	4.49912	ZCWPW1	3.72451	ENOPH1	3.90664	TLCD2	4.05783
1093	BORCS7	4.9529	ERI3	3.55269	HDAC4	4.49779	MRPL39	3.72358	GRIN2C	3.90623	TMEM117	4.05762
1094	SH3BGR	4.95085	SNTB1	3.55245	ZBTB7A	4.49688	NOSIP	3.72248	MED16	3.90399	NSMCE1	4.05715
1095	NUDT14	4.95051	ROBO3	3.55162	SPINK2	4.49685	AFAP1L1	3.72228	NPY1R	3.90393	PPP5D1	4.05686
1096	GPR27	4.94742	SAR1A	3.55102	MRPL35	4.49671	CLCN6	3.71741	DARS	3.89896	NOV	4.05424
1097	GRM3	4.94716	CACUL1	3.54801	GLIS1	4.49578	LOC105274304	3.71499	USP5	3.89886	LMO3	4.05352
1098	PNMT	4.94451	LINC00320	3.54779	ORC4	4.49569	TEX26	3.71467	TPT1	3.89756	SRRD	4.05045
1099	DARS	4.94324	GPC6	3.5477	VCPIP1	4.49013	PGBD4	3.71331	IL1B	3.89734	SREK1IP1	4.04886
1100	TRPS1	4.94157	CDC42P3	3.54616	RFPL3S	4.48993	GPR108	3.71183	SH3PXD2B	3.89693	MRPS16	4.04531
1101	RNF5P1	4.94145	EIF6	3.54595	ARHGAP44	4.48757	AHNAK2	3.71061	DPF1	3.89448	SCGN	4.04254
1102	TMEM258	4.93995	POC1A	3.54477	CCDC47	4.48188	PRSS16	3.71009	FAM71F1	3.89405	FGFR3	4.03821
1103	FADS3	4.93992	CRIM1	3.54476	STAU2	4.47956	PTPA	3.70924	DYNLL1	3.89283	PFDN5	4.03616
1104	RYR1	4.93807	SH3GLB2	3.54468	TAS2R4	4.47732	SC5D	3.70898	CRYZL2P	3.89206	ORC6	4.03223
1105	FERMT1	4.93657	UBR4	3.54341	DCTN4	4.47568	RTCA	3.70633	CPAMD8	3.89205	EFNB1	4.02921
1106	FAM105A	4.93639	LAPTM4A	3.54246	PDE10A	4.47552	NME1	3.70616	LPCAT2	3.89136	PPP4R4	4.02876
1107	PUM3	4.93631	CMTM4	3.54223	MED21	4.47544	COX17	3.70576	HGF	3.88444	CPNE7	4.02857
1108	DLL3	4.93384	HLA-DRB4	3.54181	KIF5A	4.47469	GCSHP3	3.7053	BMP7	3.88423	KLRG1	4.02722
1109	SHISA9	4.93254	ZBTB44	3.54046	BRSK2	4.47031	PPA2	3.70521	APRT	3.88353	LRCH2	4.02395
1110	PPP1R1A	4.93003	CFD	3.53898	CISD2	4.46793	DRD1	3.70447	ADAMTSL3	3.88284	NDP	4.02249
1111	CRSP8P	4.92882	MAFK	3.53844	SKIL	4.46605	SCG5	3.70436	EIF6	3.88049	ARRB1	4.02099
1112	SIN3B	4.92741	ADAMTSL3	3.53836	ZNF41	4.46548	CAMK2G	3.70261	SRRD	3.87989	HIST1H2BM	4.01897
1113	MIF	4.92069	HSDL2	3.53438	AP4E1	4.46465	RSPH3	3.70245	TXNL4A	3.8743	KLHL35	4.01618
1114	SPATC1L	4.9188	SLC44A2	3.53317	CROCCP3	4.46193	LGI3	3.70207	RNF135	3.8731	PLAC9	4.01424
1115	FIGNL2	4.91838	PRKCG	3.5325	CNNM2	4.46133	LRP12	3.7001	HMGCR	3.87108	ZRANB3	4.0131
1116	VPS37D	4.91728	BDH2	3.53171	NCKIPSD	4.45992	CAB39	3.69933	PYCR2	3.8701	RPL7A	4.01145
1117	HERC5	4.90901	CTH	3.53152	ZNF223	4.45651	PPIA	3.69924	ENKUR	3.86842	PGRMC1	4.0103
1118	CSPG4	4.90706	TMEM186	3.53093	CAPN15	4.45528	AMPD3	3.69752	FAM171B	3.86831	ANAPC11	4.01011
1119	B9D1	4.90519	GTDC1	3.52401	PTTG1	4.45343	RRP15	3.69732	FYCO1	3.86747	COL4A1	4.00936
1120	ARL16	4.90343	TMEM59	3.52247	H2AFY2	4.45274	LINC01296	3.69712	TCFL5	3.86655	AMZ2P1	4.009
1121	FABP5	4.90232	PTGER3	3.52237	EPS8L2	4.45053	SKAP1	3.69654	TRMT12	3.866	PIGP	4.00882
1122	SIDT2	4.90191	AP2M1	3.5203	FGF14	4.45005	DDHD2	3.69457	PMPCB	3.86363	NAGK	4.00605
1123	SAR1A	4.89984	ARL3	3.51758	HNRNPA3P1	4.44852	HSPA9	3.69413	RAB34	3.86313	APOC1	4.00473
1124	SGSH	4.89857	POLR3K	3.51636	PPP1R16B	4.44682	MRAP2	3.69299	BRD7	3.8627	GLRA2	4.00473
1125	MAST3	4.89565	LINC01554	3.51455	IREB2	4.4451	DEPDC5	3.6915	GOLGB1	3.86245	SLC39A4	4.00311
1126	FFAR4	4.89399	SRGAP1	3.51367	ZNF16	4.44336	UBL4A	3.69032	SUGT1	3.85877	NT5DC2	4.00207
1127	RNF135	4.89258	JMJD7	3.51356	PRICKLE1	4.44104	POLR3H	3.69015	FZD9	3.85534	RAB10	4
1128	TNFRSF13C	4.89234	DENND2A	3.51317	LPIN2	4.43889	GREM2	3.68682	TSPAN33	3.85211	TMEM158	3.9984
1129	SMAD3	4.89228	NUDCD2	3.51043	TUBGCP6	4.43566	TPTE2P6	3.68434	LINC01485	3.85211	GPR37L1	3.99697
1130	SNX13	4.88909	CRNDE	3.50835	ITFG2	4.43551	CTAGE7P	3.68421	MRPL18	3.85203	CACNA1H	3.99205
1131	RPS6	4.88503	CAPZA1	3.5069	ILF3	4.43307	SPCS2	3.68399	FAHD2CP	3.85106	GPC4	3.99135
1132	E2F5	4.8846	TSPAN33	3.50476	ZNF557	4.43291	SLC22A18AS	3.68233	RMND5B	3.84868	PPIL6	3.9899
1133	SNTB1	4.88102	MRPS18A	3.50442	WDR33	4.43276	OSER1	3.68216	RAB10	3.84716	CYBA	3.98972
1134	SLC2A10	4.88081	CDO1	3.50254	MCRS1	4.4318	FRK	3.68196	CTC1	3.8469	STMN4	3.98868
1135	MANF	4.87977	TCP1	3.50221	ACVR1	4.43161	DUSP6	3.6783	AP3M2	3.84591	PDGFA	3.9858
1136	LOC101060091	4.87868	SLC40A1	3.49982	LOC100130950	4.43093	PKM	3.67721	GRID2	3.84458	PTGER4	3.98392
1137	EPHA10	4.87752	CDKN2D	3.49749	GOLGA8A	4.42845	EI24	3.67649	SHISA9	3.84203	PSMB7	3.98309
1138	ELL3	4.87607	DYNC1I1	3.49746	RABL2A	4.42843	RPH3AL	3.67626	PSD3	3.84199	SLIRP	3.98205
1139	PET100	4.87279	MED14OS	3.4974	SLC25A12	4.42749	PGAM1P5	3.67593	VPS37D	3.84088	PGM2L1	3.98156
1140	RYR3	4.87184	CORO1A	3.49699	TAS2R10	4.42743	ACTR1B	3.67589	FAM181A	3.83906	SLC1A3	3.97955
1141	RPS23	4.87126	RPL24	3.49619	MAP3K9	4.42656	CTXN3	3.67523	MLNR	3.83887	SEC14L2	3.97536
1142	CGREF1	4.87036	SNX22	3.49613	MFHAS1	4.42643	C6orf136	3.67492	AKR7A2	3.83579	NACA	3.97481
1143	LOC100507516	4.87018	KLF6	3.49458	HCN2	4.42516	JPT2	3.6744	USP39	3.83436	RXRA	3.97439
1144	CABCOCO1	4.86872	SGSM3	3.49392	ANKRD34C	4.4231	EFL1	3.67411	HERC5	3.83369	EEF1AKMT1	3.97248
1145	DIRAS3	4.86856	RPS15	3.49356	LINC00963	4.42301	LOC101929066	3.67383	KCNJ12	3.83342	PPARA	3.97101
1146	TREM2	4.86624	LYPD6	3.4932	MTDH	4.42257	CAPNS1	3.6735	CARD17	3.83318	RPL23	3.97076
1147	EFHC2	4.8644	PTRH1	3.49231	BBOF1	4.42239	GSTT1	3.67174	ACAT1	3.83081	THAP8	3.9697
1148	UTP11	4.86381	BCL7C	3.48997	HSPB9	4.41709	MAF1	3.66978	FIP1L1	3.82886	LOXL3	3.96958
1149	ADAMTS19	4.86286	POMP	3.4887	BCAS4	4.41381	EXOSC5	3.66968	LAT2	3.82646	FAM71F1	3.96767
1150	SERPINB8	4.86193	MRPS25	3.48776	MAT2B	4.41281	PCNP	3.66669	AIFM2	3.82595	ZFAS1	3.96221
1151	LRRC56	4.86017	S100A6	3.48752	TCHP	4.41205	GSTZ1	3.66515	GRIK3	3.82587	C16orf89	3.95934
1152	SEMA4F	4.85771	GBAP1	3.48563	KDM7A	4.41099	CTSZ	3.66363	BEGAIN	3.82483	HRASLS	3.95811
1153	GNPTAB	4.85625	RSPH14	3.48452	CUL5	4.41007	THOC5	3.65784	SCAMP1-AS1	3.82406	ANKLE2	3.95762
1154	PRAF2	4.85591	BRF2	3.48427	EML2	4.40916	LIPC	3.65726	FZD8	3.82283	GBA	3.95684
1155	RPL7A	4.85497	AKR7A3	3.48246	CKMT1A	4.40834	TAPBP	3.65714	C16orf95	3.82225	RPL23A	3.9546
1156	UQCR11	4.85495	SLC2A4RG	3.48143	PCGF6	4.40712	EIF2B2	3.65598	CSTB	3.82211	RFX2	3.95237
1157	PPEF1	4.84716	VWCE	3.48123	UBE2D1	4.40599	NEURL4	3.65544	ACOT8	3.82182	DLL3	3.95235
1158	GNG10	4.84633	DZIP3	3.47985	ERCC4	4.40537	APBA2	3.65515	KLRC3	3.81969	CRYM	3.95197
1159	BCR	4.84625	GPAA1	3.47723	ST7L	4.4049	EIF4E1B	3.65456	ACTC1	3.81447	RASL11B	3.94882
1160	ZCCHC18	4.84553	ITGAX	3.47656	SNRNP35	4.40235	IFFO2	3.65408	TPST1	3.81419	SELENON	3.94721
1161	FGD3	4.84518	P2RY12	3.4752	VSTM2A	4.40196	GLRX	3.65143	THAP8	3.80839	CPEB2	3.94631
1162	PLPPR1	4.84488	LARS2	3.47503	ZBTB8A	4.39681	CSPP1	3.64942	CLNS1A	3.80688	FABP3	3.94517
1163	NUDT16L1	4.84112	SNAPIN	3.47455	RAD54L	4.39589	ALDOC	3.64908	ADPRHL2	3.80126	LOC100240735	3.94464
1164	WRB	4.83846	RTN4RL2	3.47338	KANSL2	4.39325	ZNF623	3.64881	FAM200B	3.79915	SVOP	3.9446
1165	ZDHHC12	4.83575	TAPT1	3.47211	LINC00889	4.39232	ALS2CL	3.64721	IL4I1	3.79713	CENPVL3	3.94403
1166	AXL	4.83528	FAHD2CP	3.4711	SORCS1	4.39165	BCL7B	3.64534	PKP3	3.79603	YTHDF2	3.94132
1167	DOC2A	4.83202	OAZ2	3.47051	ZBTB21	4.39011	ABHD12	3.64533	GLG1	3.79566	TM7SF2	3.94082
1168	ENDOU	4.83142	DHCR24	3.46964	MPP1	4.38926	SLC24A2	3.64517	IL13RA2	3.79481	LINC01176	3.93917
1169	VPS26B	4.82383	TUBB2B	3.46826	MYC	4.38309	SEC14L5	3.6433	FABP3	3.79478	DNAAF4	3.9372
1170	SPRED1	4.82366	SPACA9	3.46744	DNAJC25	4.38286	GEMIN6	3.64085	OGG1	3.79469	NTSR1	3.93337
1171	DRAM1	4.82052	FZD2	3.46705	SRA1	4.38158	MKRN2	3.64059	NALT1	3.79467	ANG	3.93195
1172	GNAQ	4.81897	ZIC5	3.46611	NAGPA	4.37821	PIGT	3.6404	ABI3	3.79075	TLR3	3.9291
1173	PLXNC1	4.81884	SSTR2	3.46534	BCL11A	4.37629	HNRNPUL2	3.64001	RPS14	3.79073	LOC101928111	3.92901
1174	RIPK2	4.81753	CDC14A	3.4648	KLHL3	4.37609	CACYBP	3.63951	TIMP2	3.78996	ACAD9	3.92653
1175	CD83	4.81744	NSMCE1	3.46422	SLC35F3	4.37584	FBXO45	3.63849	HRASLS	3.7897	FRA10AC1	3.92642
1176	RPS4X	4.81687	DPF1	3.46363	PCTP	4.3758	NEDD9	3.63732	TMEM59L	3.78872	MRPL30	3.92632
1177	BCKDK	4.81677	ELOB	3.46306	MGARP	4.3751	SPSB1	3.63675	ITM2B	3.78821	TXNL4A	3.92556
1178	EIF4EBP1	4.81651	SKAP2	3.46114	CRYGS	4.37436	GTF3C5	3.63284	MAPRE1	3.78802	VSTM2B	3.92529
1179	GSKIP	4.81634	GATB	3.45943	ARID1B	4.3739	MYBPC3	3.6291	OTOF	3.78683	ACTR3B	3.92504
1180	NCAM2	4.81551	SMIM27	3.45833	URB2	4.37375	DPH3P1	3.62773	ANGEL1	3.78223	TMEM234	3.92436
1181	SCIN	4.81542	TXN2	3.45804	SHANK3	4.37264	DYNC1H1	3.62695	TMEM184B	3.78121	TMEM164	3.92375
1182	LOC101927318	4.81491	PAOX	3.45782	HUNK	4.37176	CHMP5	3.62492	GULP1	3.7809	BRD7	3.92166
1183	PCDH20	4.81486	TTC38	3.45773	HPS1	4.37072	IMPDH1	3.62439	TNNT1	3.77953	CABYR	3.9174
1184	LYPD2	4.80855	ASCL2	3.45668	PLEKHO1	4.37032	DOK3	3.62406	TLCD2	3.77838	GTF2IRD2	3.91705
1185	MPV17L2	4.80703	HTRA1	3.45656	ZNF37BP	4.36928	NTPCR	3.62265	FDXR	3.77722	FCGR3A	3.91507
1186	EPS8	4.80315	NRDC	3.45611	PRR16	4.36872	PPIAP30	3.62235	NEBL-AS1	3.77719	TMSB4Y	3.91449
1187	LOC728392	4.79431	TKFC	3.456	MIPOL1	4.36774	HMOX2	3.62173	MYH15	3.7769	MCRIP1	3.91445
1188	SCAMP1-AS1	4.79357	RTP1	3.45535	ADCY9	4.36729	EID2	3.62138	ALDH4A1	3.77585	SIN3B	3.9127
1189	CRHBP	4.79355	SMAD2	3.45523	LIN28B	4.36246	DUSP2	3.61985	SPRN	3.77435	SASH1	3.9126
1190	HTR7	4.7924	CBLN1	3.45504	ZNF192P1	4.36134	PGAM1	3.61966	CALU	3.77301	NWD1	3.91236
1191	DACH2	4.79067	MVD	3.45381	H1FX	4.36067	PGS1	3.6195	FAM102B	3.77248	NUS1	3.91092
1192	FDXR	4.78991	BRWD1	3.45287	EXOG	4.3597	RPL28	3.61809	GABRG1	3.77153	CERS4	3.91077
1193	MS4A7	4.78849	MEX3A	3.45165	KCND3	4.35893	CCDC92	3.61743	JARID2-AS1	3.77127	RASL10A	3.90906
1194	ASH2L	4.7881	ZNF239	3.45137	CACNG8	4.35887	MGAT4C	3.61615	CREG1	3.76995	WIF1	3.90795
1195	NSUN6	4.78641	OST4	3.44929	CEP57	4.3587	HYAL3	3.61557	PNPLA3	3.76951	NUDT14	3.90768
1196	CCBE1	4.78296	LRRC42	3.44821	SERAC1	4.35665	GDI2	3.61556	COPS9	3.76776	FERMT1	3.90485
1197	NT5DC2	4.78283	KPNA2	3.44759	SLC24A2	4.35102	TRAM2-AS1	3.6152	ARL10	3.76649	AKIP1	3.9047
1198	RPL38	4.78223	PLEKHA7	3.44717	JCAD	4.35099	ZNF385D	3.61465	NKD2	3.76454	HEPN1	3.9045
1199	PACRG	4.78215	NEK11	3.44533	RPRD2	4.35081	MOCS1	3.61389	SPATA7	3.76378	LSP1	3.90419
1200	OPRM1	4.78013	FEZF2	3.44321	XPR1	4.3508	ZNF260	3.61289	SERPINB2	3.76125	DCAF11	3.90312
1201	TMEM120A	4.7787	SERHL2	3.44221	SMIM3	4.35046	AIFM1	3.6126	LOC101929066	3.76054	AK4	3.90167
1202	TLR3	4.7784	TPD52	3.44008	ZNF692	4.35024	MGC34796	3.61134	PWP2	3.7603	RTL8A	3.90102
1203	LOC101927027	4.77784	CCR1	3.43803	TAS2R13	4.34966	GAST	3.61116	CAPZA1	3.75941	GRIA1	3.90036
1204	TMED10P1	4.77742	SLC16A2	3.4378	RELT	4.3492	DPM1	3.61029	MON1A	3.75383	NFKBIE	3.90032
1205	C5orf49	4.77713	RPL19	3.43762	NSUN2	4.34911	SLC6A13	3.61006	PLAC9	3.7523	USF3	3.89862
1206	HES4	4.77622	MAPK8IP2	3.43696	MSH2	4.34743	HSPH1	3.61003	BAIAP2L2	3.74998	HIST1H2BC	3.89791
1207	PLEKHO2	4.77509	SLC35A2	3.43632	PPFIA4	4.34618	RBP1	3.60668	SLC6A19	3.74877	CCT6B	3.8977
1208	CASC10	4.77413	TMEM128	3.43627	CROCCP2	4.34458	FAM50A	3.60367	INTS4	3.74661	PRDX6	3.89728
1209	ELOB	4.77386	RNASE6	3.43518	ANKRD26	4.34436	WDR47	3.60356	ENDOU	3.74597	LINC01485	3.89669
1210	TRIM8	4.7735	MPP6	3.43331	GTF2H2B	4.34352	SPTBN5	3.60313	LYPD1	3.7456	HMOX1	3.8962
1211	ANOS1	4.77225	P2RX5	3.43247	UPF2	4.34331	MDFIC	3.60188	RPS4X	3.74463	FIP1L1	3.89526
1212	AMIGO2	4.77043	CHP2	3.43155	CLOCK	4.34201	LRSAM1	3.59935	RGS1	3.74462	RPL30	3.89282
1213	TUBB6	4.76931	FSTL5	3.43096	AEBP2	4.33966	IFI6	3.59881	RPL10A	3.74297	WASHC3	3.8901
1214	LRCH2	4.7671	ANKRD50	3.43063	JMJD1C	4.33738	STEAP1	3.59844	HBQ1	3.74221	SMIM15	3.88982
1215	PPP2R5A	4.76502	RHOJ	3.42956	DSTYK	4.3359	CHORDC1	3.59698	CYP4V2	3.74132	GPRC5C	3.88977
1216	LOC101928111	4.76344	ATP6AP1	3.42941	MAD2L1	4.3358	RTN2	3.59681	DNAAF4	3.73902	SLC29A4	3.88834
1217	KIAA1024	4.75949	HERC5	3.42895	SLC47A1	4.33458	USP5	3.59649	ATP6V0E1	3.73886	ANGPTL4	3.88675
1218	LILRB4	4.75654	ELF4	3.42662	EXPH5	4.33368	UBE2K	3.59519	RGS4	3.7367	CEP170B	3.88458
1219	TIMM13	4.75565	RARRES3	3.42614	LRPPRC	4.33301	PHKB	3.59462	LOC101928370	3.73612	AHR	3.88369
1220	DOC2B	4.74943	BCLAF3	3.426	ABCA5	4.33265	SNRPA1	3.59359	HTR1A	3.73574	SLC25A22	3.88307
1221	NABP1	4.74801	DKK3	3.42523	HERC3	4.32918	KCNJ11	3.59304	PIGP	3.73371	SLC12A4	3.88218
1222	RPL21	4.74542	NUS1	3.42482	RPS6KA6	4.32911	ZBTB41	3.59246	CYP51A1	3.73202	CD74	3.88
1223	MRPL37	4.74461	MESD	3.42402	MLPH	4.32881	HSPE1	3.59147	FAM241B	3.73168	RGS20	3.87611
1224	PALM	4.74117	NSA2	3.4233	CBWD1	4.32777	NIPAL3	3.58997	TIMP4	3.72612	SYTL2	3.87532
1225	CC2D2B	4.73959	RTCB	3.42275	EMB	4.32758	TMEM169	3.58702	MFSD12	3.72578	SHISA9	3.87521
1226	USF3	4.7394	NIP7	3.42138	GNAS	4.32587	SYNGR2	3.58606	TSKU	3.72219	SPON2	3.87486
1227	SIGLEC11	4.73704	SYT9	3.42114	STXBP5L	4.3246	CCT4	3.58426	TMEM164	3.72156	CD83	3.87383
1228	CLNS1A	4.73626	EIF2B4	3.41826	ARHGEF33	4.32422	LAMTOR3	3.58422	ISG15	3.71817	RARRES3	3.87281
1229	SLC1A4	4.73603	FAM98A	3.41789	ZNF443	4.32305	COX14	3.58403	PMM1	3.71808	RGL1	3.87274
1230	RPL35A	4.73537	HMGCR	3.41784	NFXL1	4.31859	P2RX6	3.5818	PPP5D1	3.71798	RAB13	3.87252
1231	NOVA2	4.73417	VAV2	3.41762	EPHB2	4.31731	RNF157	3.58135	RHBDD2	3.71755	AHRR	3.86983
1232	GRID2	4.73226	ASH2L	3.4167	NHLRC2	4.31418	AK2	3.58055	TRPS1	3.71653	SULF2	3.86924
1233	TRMT5	4.73091	ABHD1	3.41633	TMEM255B	4.31112	ZMAT3	3.57814	CTSH	3.71384	JAML	3.86911
1234	MTCH1	4.72855	NENF	3.41549	MBLAC1	4.31034	CLP1	3.57679	RAB13	3.71322	ACOT8	3.86901
1235	NOTCH2	4.72823	TPRG1L	3.41501	DDX19B	4.31017	WDR83	3.57589	STK32C	3.71134	PTP4A1	3.86884
1236	TM2D3	4.72775	EYA2	3.41407	KHDC4	4.30902	LDHC	3.57565	PMVK	3.71107	LRP10	3.86854
1237	TNNI3	4.72609	BLID	3.40908	BRSK1	4.30876	CCDC115	3.57446	SFRP1	3.70953	BCKDHB	3.86772
1238	RNF7	4.72577	SLC35E3	3.40804	CLK3	4.30859	CYP27A1	3.57254	DHDDS	3.70902	ZNF277	3.8674
1239	RTN4RL2	4.72448	HEPH	3.40556	SRSF11	4.30854	MPND	3.57066	AKIP1	3.70819	RPL21	3.8644
1240	DKK3	4.72319	GULP1	3.40535	PTGS2	4.30689	CRTAC1	3.56977	SLC12A4	3.70812	LINC00674	3.86177
1241	COMT	4.72169	KLC1	3.40374	MATR3	4.30678	DPP7	3.56888	COLCA1	3.70694	CPE	3.85955
1242	CYP46A1	4.72107	SSC4D	3.40179	MRGBP	4.30558	GRSF1	3.56747	ETF1	3.70566	GNG10	3.85927
1243	C16orf89	4.72086	MPV17L2	3.40175	ADNP2	4.30489	TRMT1L	3.56555	FFAR4	3.7028	GFAP	3.85855
1244	LOC101930085	4.72018	DYDC2	3.40039	CCNJ	4.29959	PRKCB	3.56483	SYTL3	3.70187	STK17A	3.85633
1245	UFC1	4.72016	CNPY2	3.4001	RAB3GAP2	4.29911	BICC1	3.56327	RPS27L	3.69998	ALKAL2	3.85553
1246	DENND1C	4.72013	TMEM117	3.40003	UIMC1	4.29836	TM9SF2	3.56199	CD6	3.69937	ITM2B	3.85538
1247	C16orf95	4.71758	CA10	3.39899	CFP	4.29805	ZNF302	3.56151	RPL31	3.69915	GTPBP3	3.85502
1248	MAPK8IP1P2	4.71669	FAHD2A	3.39774	STK36	4.29733	POLR2B	3.56147	HES1	3.69785	GNG5	3.85468
1249	DYRK3	4.71411	RHEB	3.3976	KMT2B	4.29718	ZNF429	3.56135	NSMCE1	3.6978	PLCB2	3.84848
1250	TLCD2	4.7133	HES5	3.39682	CCDC39	4.29588	DBT	3.56066	SARDH	3.69494	TBC1D26	3.84755
1251	PRMT6	4.71204	GLIPR2	3.39569	FAR2	4.29583	NIT1	3.55998	NT5DC3	3.69487	LOC101927811	3.8463
1252	C2orf73	4.71195	RIDA	3.39457	MALAT1	4.29515	C12orf10	3.55962	ABCB6	3.69359	SLC6A19	3.84429
1253	SMAD1	4.7117	MLNR	3.39339	FRAT2	4.29156	MRPS30-DT	3.55959	HPCAL1	3.69292	LPP	3.84206
1254	EGLN1	4.70984	CLCN6	3.39085	NFKBIZ	4.29126	ADPRHL2	3.55943	C1orf226	3.69112	HLA-DMA	3.83766
1255	RASL10A	4.70806	PCDH8	3.3891	SUPT16H	4.29114	ECM1	3.55916	HCK	3.68909	DHCR7	3.83736
1256	LINC01315	4.70684	GCDH	3.38835	OIP5-AS1	4.28988	TCF25	3.55778	ANGPTL4	3.68509	NTNG2	3.83675
1257	ARHGDIA	4.70642	MTMR9LP	3.38826	SLCO4A1	4.28867	CCT2	3.55772	PHF10	3.68491	SLC19A1	3.83647
1258	LOXL3	4.70547	RGS4	3.38753	HS6ST2	4.28752	UNC5B	3.55735	MPND	3.68466	SLN	3.8333
1259	GOLM1	4.70484	LYRM2	3.38688	ZZEF1	4.28551	PITRM1	3.55702	TUBB2B	3.68348	KRT83	3.83261
1260	PRNP	4.70187	POMGNT2	3.38611	SCARF2	4.28409	RELB	3.55636	RPL24	3.68067	CSPG4	3.83192
1261	INPP5K	4.6975	NSMF	3.38592	CALCOCO1	4.28396	MOAP1	3.55598	VWCE	3.68029	SERPINB2	3.83166
1262	OTOF	4.697	EIF3H	3.38589	FSTL4	4.28285	ARF5	3.55436	LIPA	3.67944	MKL2	3.82869
1263	TRMT12	4.6958	LDHC	3.38531	PPP3CA	4.28227	SLC25A10	3.55433	PNPLA6	3.67877	MVD	3.82752
1264	ACTR10	4.69515	LINC00467	3.38502	OR2L3	4.28222	CKAP4	3.55189	COLGALT2	3.6766	PSTPIP1	3.82585
1265	EEF1B2	4.69427	RDH11	3.385	FLRT3	4.28176	CCDC39	3.55063	GTF3C6	3.67523	ZNF577	3.82464
1266	COLCA1	4.69266	STX17-AS1	3.3846	MROH8	4.2815	AP4M1	3.55059	MTCH1	3.67401	C2orf73	3.82443
1267	CHCHD7	4.69109	TRIM24	3.38264	DCBLD1	4.2807	CAPZA1	3.5499	SLC35E3	3.67346	CHCHD7	3.82399
1268	KLK5	4.6898	GLO1	3.38239	RSBN1L	4.27576	ZFP91	3.54836	NLE1	3.67299	PLXDC2	3.82397
1269	MYH7	4.68615	RPL32	3.38196	CHFR	4.27483	UQCRC1	3.54663	NOTCH2	3.6727	ADGRV1	3.8216
1270	LOC100288911	4.68593	PLCB2	3.38144	DDX55	4.27446	CREB3L3	3.54487	ANO2	3.67222	ADTRP	3.82123
1271	SYNPR	4.68497	CTC1	3.37988	ALG2	4.2737	NRP1	3.54411	DMAC1	3.67123	KLHDC4	3.82101
1272	ZNF831	4.68141	TPD52L2	3.37659	SCRN1	4.27119	FHIT	3.5434	IFI30	3.67053	PERM1	3.81941
1273	NFKBIE	4.68141	NAXE	3.37425	PPP2R2D	4.27058	PHB	3.54265	CPE	3.67034	ERLIN1	3.8189
1274	STK32C	4.67847	RASL10A	3.37405	GLS	4.26978	AKAP8	3.5413	FUT9	3.66932	RAMP1	3.81839
1275	CACUL1	4.67833	HDLBP	3.37186	ABCC5	4.26928	NIPSNAP3B	3.5404	C17orf67	3.66779	IFI16	3.81837
1276	ID4	4.67695	ZMYND15	3.37123	CCNI	4.26922	ATP6V1E1	3.54002	HPCAL4	3.66701	PIP4K2B	3.81708
1277	LOC100507351	4.67589	PNCK	3.37062	HNRNPA0	4.26911	RNF13	3.53974	TUBB8P12	3.66455	MED16	3.81702
1278	TBCB	4.67411	BCR	3.36761	CHGA	4.26405	DIP2B	3.5375	FARP1	3.66444	TRAM1L1	3.81604
1279	FIBIN	4.67237	PITPNB	3.36607	ZMYM6	4.26369	POLG	3.53654	RPS27	3.66412	GPAM	3.81308
1280	KLHL35	4.67195	BAG2	3.36222	ZBTB33	4.26344	FOXL2	3.536	IL3RA	3.66385	AIFM2	3.80767
1281	GTPBP3	4.67085	PKIA	3.36216	KDM4C	4.26311	FOXD1	3.53575	GALM	3.66182	EVI2B	3.80523
1282	UBB	4.67076	NRCAM	3.36181	ARL2BP	4.26118	SLC12A7	3.53505	GTPBP3	3.66073	GSS	3.80112
1283	CDH11	4.66925	SLC1A4	3.3618	IGF1R	4.26	GPIHBP1	3.5341	WAC	3.65822	LARGE1	3.79951
1284	FZD8	4.66889	DHRS7B	3.35801	GPR19	4.25761	FMN1	3.53294	IFI27L1	3.65794	ASCC3	3.79876
1285	PSMB2	4.66305	KCNJ12	3.35745	PCDHGA7	4.2548	MMADHC	3.53274	PAMR1	3.65606	CMTM6	3.79537
1286	ACTG1	4.66192	SH2D5	3.35642	PDE7B	4.25452	RNF40	3.53256	FGGY	3.6546	HSPB3	3.7946
1287	CSTB	4.65961	CENPP	3.35595	PRPF4B	4.25228	REPIN1	3.53073	THBD	3.65392	SOX3	3.79391
1288	CIB1	4.65807	TSPAN2	3.35301	MRRF	4.25195	CHST15	3.52988	SULF2	3.65247	RIIAD1	3.79336
1289	FCGR2A	4.65708	WLS	3.35252	YTHDF3	4.25166	COX5A	3.5285	SEMA4A	3.64562	IPO5P1	3.79333
1290	CACNG3	4.65681	PSMB2	3.35156	ATG4D	4.25109	ABHD16A	3.5283	PLSCR4	3.64277	S100A2	3.79285
1291	ACAT2	4.65564	C1orf226	3.3511	CYFIP1	4.25082	OGDHL	3.52501	ID4	3.64249	IGSF22	3.79099
1292	NALT1	4.65422	CLDN10	3.35079	PIP5K1C	4.25054	SOWAHB	3.52471	CCNH	3.64149	TMIGD3	3.78926
1293	NTNG2	4.65118	SNRPC	3.35032	ARID3B	4.2462	ABTB1	3.52458	STMN4	3.64136	VPS29	3.78574
1294	ZSWIM9	4.6477	FAM210A	3.35012	RTN4	4.24545	PSME3	3.52451	PPP2R2A	3.64057	CLTCL1	3.78371
1295	STYK1	4.64722	SEC61A2	3.3499	PAIP1	4.24407	CACNG6	3.52216	CASC10	3.63852	CHRM4	3.78297
1296	HILS1	4.64356	CCT7	3.34874	PTPRT	4.24317	ETV5	3.52213	C11orf65	3.63829	DACT1	3.78195
1297	SQOR	4.64228	DCTN6	3.34825	PLCB4	4.24269	ARMC8	3.52133	ZNF229	3.63526	SERPINA1	3.78195
1298	SH3PXD2B	4.64022	MSN	3.34742	TCOF1	4.242	SLC7A1	3.52045	RABAC1	3.63512	CTSH	3.77797
1299	NHP2	4.63728	CPNE2	3.34701	RAPGEFL1	4.24131	SYNDIG1	3.52041	SMIM15	3.63434	TMEM170A	3.77794
1300	CHST1	4.63642	TMEM184B	3.34683	TMEM268	4.24056	RASSF5	3.51927	ERLIN1	3.63275	OARD1	3.77724
1301	MYL6	4.63517	RPS12	3.34599	BCO2	4.23899	HPRT1	3.51573	MVK	3.63198	NTSR2	3.77535
1302	ANGPTL4	4.63516	ARFIP1	3.34595	KIN	4.23825	P2RY14	3.51436	DLL3	3.63158	DHRS4	3.77365
1303	RPS27	4.63216	SERINC1	3.34558	STOX2	4.23716	SLC7A5	3.50989	SGCB	3.62881	CISD3	3.77273
1304	LRRN2	4.63044	FHOD3	3.34514	CNTN5	4.23439	GGA3	3.50972	SIN3B	3.62863	NXT2	3.77244
1305	GABARAP	4.62984	SMIM10	3.34501	ADD2	4.23336	DLST	3.50922	ENY2	3.62715	CFL1P1	3.77143
1306	SDK2	4.62976	RPLP0	3.34331	SELENOO	4.2321	GOLGA7B	3.50919	DKFZP586I1420	3.6221	DUSP18	3.76937
1307	JPH4	4.62921	FZD9	3.34252	DNA2	4.23202	AAMP	3.50814	PSMB2	3.61969	ZDHHC24	3.76913
1308	NXT2	4.62808	BATF3	3.34238	GOLGA6L10	4.23071	MYH7B	3.5076	USE1	3.61876	P3H2	3.76821
1309	RPL23AP7	4.62716	SF3B6	3.34191	SRSF8	4.22977	EIF1AX	3.50602	AP1M1	3.61823	SPACA9	3.76711
1310	TMEM53	4.62399	SH3PXD2B	3.33934	SLC7A6	4.22889	PARP3	3.50588	WDR54	3.61727	CMTM4	3.76479
1311	ZNF229	4.62223	PYCR2	3.33879	KCNJ14	4.22789	YME1L1	3.50475	CPEB2	3.61664	CYP26A1	3.76476
1312	TBC1D26	4.62131	CTSH	3.33784	EMSY	4.2216	GALNT9	3.50369	PCBD1	3.61627	SELENOK	3.76472
1313	PHF10	4.61845	CYP51A1	3.33602	PURB	4.21973	PCBP1	3.50134	NDUFA13	3.61518	FGGY	3.76247
1314	CALHM6	4.61801	PXN-AS1	3.33566	KCNA3	4.21892	TRPT1	3.5008	LINC02076	3.61483	FXYD1	3.7616
1315	PXMP4	4.618	DOC2A	3.33371	POLN	4.21856	CDK12	3.50008	FAM84B	3.61454	PPP1R1A	3.76123
1316	NEK6	4.61762	TSPAN18	3.33279	LOC101926935	4.21696	LOC101928433	3.49759	NWD1	3.61347	MRC1	3.76076
1317	PDE2A	4.61568	LST1	3.33216	ANKRD20A8P	4.21694	ATF2	3.49614	VEZT	3.61208	ENHO	3.75986
1318	PDRG1	4.61524	ACY3	3.32995	SPRY3	4.21677	RELL2	3.49564	FAM162A	3.61159	PITPNM2	3.75816
1319	TMEM150C	4.61354	MOXD1	3.32972	TRIM9	4.21666	NRDC	3.49461	ZMAT1	3.6101	SARDH	3.75748
1320	IGFN1	4.61166	TPI1	3.32904	RALB	4.21598	CABLES2	3.49386	ESD	3.60872	CCDC86	3.75609
1321	CFAP44	4.61135	CIB2	3.32616	SLFN5	4.21458	KRAS	3.49176	GSKIP	3.6081	FSIP1	3.75513
1322	RPS21	4.61097	CARD16	3.32571	FAIM	4.21447	ZDHHC21	3.49158	WNT4	3.60725	SNX6	3.75446
1323	MCRIP1	4.61027	KCTD6	3.32359	TDRD1	4.21366	NT5DC1	3.48983	PLIN5	3.60684	NEK6	3.75437
1324	LOC339803	4.60971	PSMC6	3.32238	PVR	4.21127	ITPR1	3.48917	CHCHD5	3.60584	RNF10	3.75425
1325	AIFM2	4.60913	MOV10	3.32212	COQ3	4.21074	RAB37	3.48678	C11orf1	3.6056	SMIM30	3.75405
1326	ADM5	4.60849	GRID2	3.32142	FAM19A2	4.20983	PSMB5	3.48649	SLC30A10	3.60284	PSD3	3.75391
1327	MYL12B	4.60802	SFMBT2	3.32108	FBN1	4.20938	ZNF57	3.48532	ADIRF	3.6024	DRAXIN	3.75385
1328	RUNDC3A	4.60549	MED27	3.31891	NRG2	4.20796	UBE2D4	3.48521	C21orf2	3.59966	VPS37B	3.75248
1329	PCOTH	4.59987	NBAS	3.31819	LOC101928673	4.20576	GABARAPL3	3.48518	CCDC102B	3.59835	SUFU	3.75172
1330	FAU	4.59406	GABARAPL2	3.31818	ZNF267	4.20091	ICK	3.48459	FABP5P3	3.59763	RHBDD2	3.75052
1331	STRADB	4.59257	APBB1	3.31806	PSD2	4.20057	TAF9	3.48457	SLC39A10	3.5974	RTN4RL2	3.74814
1332	ZNF277	4.59027	TSKU	3.31609	RASSF7	4.19831	CARS	3.48272	PLPBP	3.59642	COG5	3.74802
1333	PCDHGC3	4.58971	MPHOSPH6	3.31446	FBLIM1	4.19821	CNTN4	3.48251	RPS15A	3.59538	PRR29	3.74778
1334	SETD9	4.58575	ADAM28	3.31367	VWA5B2	4.19819	NSUN4	3.48077	LINC01315	3.59233	FAM181B	3.74621
1335	ARRB1	4.58482	C8orf33	3.31249	RBM15	4.19753	PTGR1	3.4806	PRELP	3.5917	RABAC1	3.74583
1336	HES1	4.58435	RMDN1	3.31178	CASC15	4.19656	ASB6	3.47801	SKIV2L	3.59155	DPYSL2	3.74544
1337	SLC7A4	4.58337	PTPRA	3.31168	MKLN1	4.19633	EPM2A	3.477	PPARA	3.5881	ACVR2B	3.74402
1338	ITGB8	4.57892	SOX2	3.3111	PDE7A	4.19546	LETMD1	3.47653	FAU	3.58731	TNFRSF14	3.7424
1339	FAM86EP	4.57728	HLCS	3.31047	PCDHA5	4.19523	KIFC3	3.47364	GFAP	3.58466	TIMM10	3.73842
1340	TSPAN18	4.57532	TNFAIP6	3.31005	VAPA	4.19395	COX10	3.47174	TUBB2A	3.58415	XKR4	3.73814
1341	JARID2-AS1	4.57457	LCLAT1	3.30793	DNAJC11	4.18727	STBD1	3.47165	NCAM2	3.58316	HGF	3.73789
1342	CHCHD5	4.57291	TLR1	3.30774	MECP2	4.18514	PDCD6	3.47162	KCNA5	3.58311	TERF1	3.73488
1343	PMM1	4.57186	SLC25A1	3.30702	SIAH1	4.18403	NSD2	3.47151	TPD52	3.58251	IL4I1	3.73288
1344	AGT	4.56996	HEPN1	3.30539	ESYT2	4.18334	NXPH2	3.47014	NDUFB8	3.57783	HBM	3.73243
1345	PGM2L1	4.56973	TAMM41	3.3049	SPINK8	4.18318	SH3BP1	3.46586	FAM47E	3.57751	TLN2	3.73113
1346	DCAF5	4.5675	FCGBP	3.30466	VPS39	4.18311	PVALB	3.46386	EIF4EBP1	3.57616	C1QTNF3	3.72936
1347	RPS26	4.56504	HLA-DRA	3.30354	DENND5B	4.18175	AGTPBP1	3.46353	SERPINF1	3.57581	RGS1	3.72921
1348	MORN5	4.56403	BBOX1	3.30243	AP1S3	4.18125	TRIM3	3.46312	ASXL3	3.57434	SLC2A5	3.72832
1349	SMO	4.56211	PNMA8A	3.30228	CRISPLD1	4.1811	SCRN3	3.46283	RYR1	3.57336	MFSD12	3.72818
1350	DR1	4.56014	PSME3	3.30208	TCTN2	4.1806	DCAF8	3.46174	PIGO	3.5705	HDC	3.72689
1351	PLSCR4	4.55955	ZDHHC7	3.3007	AARD	4.18002	IARS	3.46113	SLC26A4-AS1	3.56937	FABP5P3	3.7265
1352	PITPNM2	4.55298	EVI2B	3.29952	CCDC134	4.17893	KCNMA1	3.46099	COL11A1	3.56924	CRHBP	3.72627
1353	COL8A2	4.55227	TANGO6	3.29862	LRR1	4.1776	DDB2	3.46091	CEP170B	3.56905	FDPS	3.72601
1354	TMEM130	4.55221	PMPCB	3.29756	DCDC1	4.17728	GZF1	3.45882	MOXD1	3.56871	PARD3B	3.72405
1355	VAT1L	4.55	BABAM1	3.29714	TMEM81	4.17432	GJC2	3.45828	B9D1	3.56849	DNALI1	3.7227
1356	2004-03-01	4.54662	FABP7	3.29355	DPY19L1P1	4.17287	CYP51A1	3.45493	KCNMB1	3.56677	C2orf80	3.72209
1357	HEYL	4.5441	DERA	3.2923	ADAM9	4.16987	CHP2	3.45468	ZSWIM7	3.5636	MIR7-3HG	3.72172
1358	CRB1	4.53951	NXN	3.28791	NIPBL-AS1	4.16915	MFAP1	3.45286	ENPP1	3.56344	MOB3A	3.72164
1359	PAXBP1-AS1	4.53905	CPAMD8	3.2875	MLXIP	4.16911	LOC100130264	3.45031	CCDC68	3.56338	RABIF	3.71895
1360	KLRG1	4.53878	FAM47E	3.28718	ZNF629	4.16881	MAP10	3.44653	PHF20L1	3.56242	NBAS	3.71812
1361	BRWD1	4.53819	CD68	3.2854	MAST4	4.16841	RAB3GAP2	3.44588	MBD1	3.56213	MBLAC2	3.71698
1362	NKD2	4.53716	SUGT1	3.28505	SLC5A4	4.16768	NEDD8	3.44444	DNAJC15	3.5613	SH3BGR	3.71595
1363	IVD	4.53509	TDRKH	3.2836	FLYWCH1	4.16656	TSPAN8	3.44417	CACNA1H	3.56001	VPS37D	3.71337
1364	HLA-DRB5	4.53235	LINC00937	3.28354	RBM25	4.15701	LRRC38	3.44091	CNPY2	3.55843	PMVK	3.71226
1365	WDR54	4.5292	MYO10	3.28148	TBC1D16	4.15593	BCL2L1	3.43891	WLS	3.55842	FAH	3.71182
1366	2001-03-01	4.52247	CRYZ	3.28079	ZNF787	4.15592	MTHFD2	3.43825	CCZ1P-OR7E38P	3.55816	LOC101060391	3.71001
1367	LTC4S	4.52147	SELENBP1	3.28041	TMEM35A	4.1538	SDHB	3.43813	RPL21	3.55752	KIF26B	3.70952
1368	RPS3	4.52016	RPL36	3.2798	FAM98B	4.15371	CNTN6	3.4377	PARP1	3.55545	SFRP1	3.70949
1369	SLC29A3	4.5194	PI4KA	3.27913	LSMEM1	4.15257	RINL	3.43647	ELL3	3.55523	PLPPR4	3.70778
1370	NXN	4.51678	FAH	3.2788	DESI2	4.1496	ADAM23	3.43416	TLR3	3.55385	TSKU	3.70621
1371	ARPP19	4.51659	CLEC14A	3.27871	CASP8AP2	4.14895	GPR26	3.43213	SH3BGR	3.55309	TSPOAP1	3.70618
1372	GSTO2	4.51191	SGCB	3.27755	RACGAP1	4.14809	DDX21	3.42562	SLC39A4	3.55285	TYRO3	3.7056
1373	MYBPC1	4.50943	IL4R	3.27606	NEGR1	4.14606	ATG3	3.42377	BABAM2	3.55252	RIT1	3.70532
1374	CCDC112	4.50912	IGFN1	3.27603	FKBP11	4.14601	EIF3K	3.42255	ZC4H2	3.55119	ALYREF	3.70272
1375	LMAN2L	4.50905	NPLOC4	3.275	TTC39A	4.14255	AGGF1	3.41863	MCTP1	3.55099	RPL10A	3.70229
1376	FCGR3A	4.5084	MAPK3	3.27366	ZNF709	4.14231	METAP2	3.41813	RAB31	3.55042	TMEM220	3.70218
1377	CAPZB	4.50783	NR4A3	3.27287	BMS1P1	4.14112	CUL9	3.41775	PLEKHO2	3.54656	RPL9	3.70154
1378	XKR4	4.50779	TPPP3	3.2724	PPT2	4.13839	LURAP1L	3.41657	ANKRD28	3.54654	E2F5	3.69802
1379	E2F3	4.5068	ACSM5	3.27236	CDH12	4.1382	NUAK1	3.41403	MAN1B1	3.54441	PHYHD1	3.69788
1380	MIEF1	4.50446	CDC42	3.27157	SORBS3	4.1375	MBD1	3.41288	CCDC153	3.54325	ELFN2	3.69674
1381	AP3M2	4.50162	TNFRSF14	3.2705	LRRC46	4.13727	OXA1L	3.41272	SLC22A18	3.54313	ZDHHC14	3.69318
1382	FGFR3	4.49942	GNG8	3.26987	CEP41	4.13633	PTGES2	3.4114	FAHD2A	3.54122	P2RX2	3.6931
1383	RB1	4.49902	HBM	3.26722	GRPEL2	4.13509	PDCL	3.41105	APAF1	3.53935	CREB3	3.69259
1384	FGFBP3	4.498	ANO2	3.26711	MBTPS2	4.13436	SH2B1	3.40806	HMGCL	3.53918	ATOH7	3.69193
1385	LOC100129291	4.49679	RBM43	3.26692	MYO5C	4.13073	GALNTL5	3.40804	GGACT	3.53893	RYR3	3.69095
1386	CYP4V2	4.49633	AP3D1	3.26685	WDPCP	4.13054	ADAMTSL2	3.40647	DSEL	3.53732	CALB2	3.69085
1387	IFI30	4.49507	VSTM2L	3.2668	ZNF383	4.12824	SYPL1	3.40638	CLCN6	3.53698	NCAM2	3.6907
1388	SMIM30	4.49347	VIT	3.26554	SLC25A41	4.12791	KYNU	3.406	FAM187A	3.5353	ELL3	3.6895
1389	PIANP	4.49179	WDR54	3.26344	EML5	4.12734	FJX1	3.40516	NACA	3.53426	SLC7A4	3.68362
1390	UROS	4.48892	PTRH2	3.26328	PCDHB16	4.12674	JHDM1D-AS1	3.40316	DOC2A	3.53384	HBQ1	3.68359
1391	LMO3	4.48562	VSIG4	3.26126	ZNF280B	4.12515	FOSL2	3.40238	CD163	3.53233	CXXC4	3.68114
1392	RGMB	4.48531	RABIF	3.26081	FLJ42627	4.12506	KRT31	3.39991	TP53BP1	3.53207	H3F3C	3.67874
1393	RPS14	4.48293	ENKUR	3.26042	SARM1	4.12433	CIAO1	3.39879	LOC339803	3.52888	DYNLL1	3.67342
1394	IFI16	4.48207	RGS18	3.26038	RBM41	4.12273	PGP	3.39759	CDC42BPB	3.52873	SPATC1L	3.67209
1395	SAMD15	4.48141	TAF10	3.25963	HERC2P9	4.12224	MAPK9	3.39608	SYTL2	3.52812	PDRG1	3.67116
1396	FAM181B	4.47821	MANEAL	3.25861	FGF7	4.12056	MED10	3.39525	RUNDC3A	3.52792	TUNAR	3.67082
1397	CDC42BPB	4.47779	LSM4	3.25654	EGR1	4.1196	DALRD3	3.3952	LRP10	3.52606	TDRKH	3.6699
1398	TMEM255A	4.47732	CRYM	3.25645	CNTNAP1	4.11956	HK1	3.39502	AZIN2	3.52589	LAIR1	3.66723
1399	STX4	4.47458	GGN	3.25635	RBBP5	4.11866	VPS33B	3.395	AHR	3.52527	GLRA3	3.6672
1400	CTC1	4.47403	MPND	3.25503	TMEM143	4.11834	CAPNS2	3.39494	ACOX3	3.52502	TUBB2B	3.6636
1401	PRKCG	4.47355	FAM84B	3.25502	BICDL1	4.11549	HSD17B12	3.39453	RBP1	3.52474	PCDHGC3	3.66315
1402	PLPPR4	4.4729	UQCR11	3.2533	ABLIM2	4.11499	ATP1A4	3.39405	FOXF2	3.52425	ZSWIM9	3.66296
1403	SLC16A5	4.47158	RAP2B	3.25229	POU3F3	4.11194	ATG7	3.39251	PMP2	3.52397	GNG2	3.66289
1404	CD58	4.47107	CCDC90B	3.25216	STRN	4.11104	CAMSAP2	3.39236	CCNYL1	3.52323	LCAT	3.6607
1405	LOC100506271	4.46559	THBD	3.25	C12orf57	4.11001	ST8SIA1	3.39101	FXYD1	3.52135	PNMA8A	3.65965
1406	FKBP1A	4.46491	FUT9	3.24834	DAPK1-IT1	4.10991	STX16	3.39063	CENPVL3	3.52111	EMX2	3.65903
1407	MBLAC2	4.46459	MIR7-3HG	3.24831	ATP10A	4.10727	MTMR4	3.38989	ICAM5	3.52057	VSTM2L	3.65894
1408	CCDC103	4.45911	XRCC4	3.2472	MYBBP1A	4.10695	LYRM4	3.38874	DCUN1D5	3.52022	PSMB2	3.65659
1409	TMEM173	4.45847	SPHKAP	3.24708	MCTS1	4.10477	KATNB1	3.38789	SETD9	3.5202	BMP2K	3.6559
1410	PRSS23	4.4552	SLC12A4	3.24703	PFKFB2	4.10254	F13A1	3.38624	CHST9	3.51921	AXL	3.65456
1411	TOMM6	4.45095	LOC148709	3.247	USP49	4.10143	MVK	3.3858	NCAPH2	3.51405	THTPA	3.65276
1412	MGAT4B	4.44886	FGD3	3.24618	ZNF366	4.10122	PLXNA2	3.38573	CRHBP	3.50996	DCUN1D5	3.64841
1413	HSPB3	4.44575	DVL3	3.2458	URGCP	4.10065	NDRG1	3.38461	SLC19A1	3.50733	PTCH1	3.64813
1414	SLC12A4	4.44448	KCNG1	3.24517	LTB	4.09889	BCL2L13	3.38393	CNTN3	3.50691	TLR4	3.64747
1415	RALA	4.44362	TAC1	3.24444	MRPS30-DT	4.09859	RPRD1A	3.38243	SERINC3	3.50688	PRNP	3.64445
1416	CCZ1P-OR7E38P	4.44231	SPARC	3.24262	TTC21A	4.09619	KCNH7	3.38052	UBC	3.50477	PRELP	3.64307
1417	PPARA	4.44153	FREM3	3.24249	TTI2	4.09618	RPA1	3.37938	TMEM219	3.50465	AKR7A2	3.6418
1418	GATM	4.44125	PLXNA1	3.24193	SLC38A5	4.09368	PRPF8	3.37825	SPATC1L	3.50434	GAS5	3.64098
1419	IDI1	4.44091	RPL29P2	3.24176	ARHGAP27	4.09265	FLYWCH1	3.37728	CYP46A1	3.50305	C1QL1	3.64079
1420	COCH	4.43599	SYNPR	3.24132	LDB1	4.09005	OCEL1	3.37663	NPB	3.5029	VASH1	3.63785
1421	MAPK1	4.43407	ZNF418	3.2406	PRPS2	4.08842	ADAMTS4	3.37597	EPHA10	3.50146	PNCK	3.63754
1422	FABP3	4.43334	ACTR1A	3.24043	SCAMP5	4.08499	PTCD3	3.37487	VAT1L	3.49877	PAAF1	3.63747
1423	IL3RA	4.43143	TPP1	3.23995	GTF2A1	4.08484	ACTC1	3.37469	LAPTM4A	3.49345	COPZ1	3.63623
1424	GNG5	4.43143	ANKLE2	3.23969	THSD7A	4.0842	SMARCC2	3.37232	JMJD1C-AS1	3.49239	KCNA5	3.6352
1425	RARRES3	4.42913	APEH	3.23867	TNF	4.08238	CDK9	3.37084	RDH11	3.49054	PLXNC1	3.6337
1426	DDX58	4.42797	CD58	3.23838	MIER1	4.08225	RMND5B	3.37043	WISP2	3.4896	NPM1	3.63197
1427	CRYZL2P	4.42628	ACTC1	3.23698	SLC29A2	4.08224	LINC01399	3.37002	SCN9A	3.48954	RPS17	3.62947
1428	SLC16A8	4.42514	TIMM17B	3.23506	AGAP11	4.07836	CHST8	3.36677	ASL	3.48912	KIRREL3	3.62888
1429	USP12	4.42438	ARHGAP5-AS1	3.23274	DLGAP1	4.07686	AES	3.36608	QSOX1	3.48828	CYHR1	3.62873
1430	MAPRE1	4.42425	COL11A1	3.22972	TRIO	4.07557	SOHLH1	3.36507	PAOX	3.48716	NECTIN2	3.62819
1431	SUSD1	4.42211	PDGFA	3.22905	WWP2	4.0728	TESC	3.36429	PNCK	3.48478	SPRED1	3.62752
1432	FKBP1B	4.42115	PID1	3.22622	CTSK	4.0717	OPCML	3.3633	SHANK1	3.48381	NOL4L	3.62715
1433	CPLX3	4.42106	ANGEL1	3.22295	SHMT1	4.0696	BMPER	3.36289	LYRM9	3.48245	PYDC1	3.62577
1434	TRAM1L1	4.42089	RFTN2	3.22081	FRMPD4	4.06923	CFAP20	3.36184	GRN	3.48228	NLE1	3.62576
1435	PNMA8A	4.41877	PSTPIP1	3.21926	ZFP3	4.06807	FXR1	3.3608	C16orf89	3.48147	PDE1A	3.62457
1436	ANG	4.41868	APCDD1	3.21863	NRG4	4.06736	CNN1	3.35998	MYOM1	3.48092	CRLF1	3.62406
1437	LOC101060391	4.41618	RAB13	3.21857	SLC46A3	4.06701	CMC1	3.35993	HTRA1	3.47851	CHODL	3.62322
1438	CHDH	4.41524	FAR2P2	3.2166	PPHLN1	4.06585	APPL1	3.35976	CFAP52	3.47764	CADM1	3.62125
1439	RTRAF	4.41479	GIT1	3.21655	MARVELD1	4.06579	IL4R	3.35894	PCBP3	3.47612	MYH15	3.62052
1440	STAG3	4.41359	TOLLIP	3.21645	CCDC126	4.06407	GJB1	3.35857	PHF13	3.47396	ALDH7A1	3.61831
1441	ACTR3B	4.40848	RBSN	3.21393	ZC3H8	4.063	CSGALNACT2	3.35737	NPY5R	3.47396	CASC10	3.6175
1442	TMEM187	4.40619	ADPRHL2	3.2121	ZNF660	4.05812	NANOS3	3.35674	WASHC3	3.47375	RPL31	3.6171
1443	EXOC6	4.40578	CMSS1	3.20968	TSPYL5	4.05705	LSM10	3.35543	SCPEP1	3.47291	PHF20L1	3.61217
1444	EVI2B	4.40267	CARD17	3.20867	TMEM69	4.05691	SHROOM2	3.34945	FAH	3.47154	B9D1	3.61136
1445	SLC7A11	4.40259	ME2	3.20672	STH	4.05506	PCDH8	3.3489	ME1	3.46902	ITGB8	3.61103
1446	SLC1A3	4.40228	PPP2CB	3.20512	PIGL	4.05497	PEF1	3.34835	NUDCD2	3.46848	TTL	3.61103
1447	PHF13	4.40132	TSPO	3.20329	JARID2	4.05382	SEMA3A	3.34432	TMEM158	3.46748	FAM187A	3.60965
1448	LOC93622	4.40059	ATP6V0D1	3.20241	EEF2K	4.05335	FBXW4P1	3.34411	ENO1	3.46598	WNT4	3.60796
1449	PHYHD1	4.39921	S100A16	3.20153	TPP2	4.05324	TPI1	3.34364	TMEM263	3.46445	HIST2H2AB	3.60759
1450	LPP	4.39855	TTPA	3.20119	PIN4P1	4.05161	RASSF2	3.34292	RPS11	3.46308	FAM241B	3.60656
1451	TRIM24	4.39829	TECPR2	3.20077	GSE1	4.05128	PPP1R12C	3.3418	PALD1	3.4623	C1QL3	3.60524
1452	MED16	4.39824	EXOSC7	3.20012	CD274	4.04871	PFN1	3.34162	ZSWIM9	3.46103	EEF1G	3.60485
1453	FAM184A	4.39794	CDT1	3.19999	NLGN4X	4.04857	TIRAP	3.34014	ITGB5	3.46095	WWC1	3.60475
1454	SLC4A4	4.39675	DHRS2	3.19865	LOC100505938	4.04829	TUBA8	3.33571	LEPROT	3.4604	ZFP36L2	3.60442
1455	HPCAL1	4.39611	CLPTM1	3.19764	SLC17A6	4.0478	RNF187	3.33392	LIMS1	3.45975	GATM	3.60407
1456	LRP10	4.39531	ARHGAP31	3.19714	AKAP10	4.04592	GK	3.33313	CBR1	3.458	EPHX1	3.60339
1457	CPNE5	4.39518	VWA5A	3.19701	HRC	4.04329	TBL3	3.3331	NPDC1	3.45656	DRD2	3.60258
1458	EEF1A1	4.39462	IDNK	3.19639	DBF4	4.0397	HCN1	3.33252	C1QL1	3.45644	MPP2	3.60139
1459	NINL	4.39125	HSD17B12	3.19639	ZNF224	4.03936	PPP1R3F	3.33244	RMDN1	3.45588	CCNH	3.60104
1460	ARL10	4.38967	CLNS1A	3.19501	MGST2	4.0392	TNNT3	3.33055	PFDN5	3.45557	ITGB5	3.60101
1461	ENOPH1	4.38515	C11orf65	3.19498	IRF2BP1	4.03897	MAGEE1	3.32949	GNAZ	3.45519	C19orf53	3.59892
1462	RSPH14	4.38497	RAPH1	3.19455	ZNF214	4.0382	MON1A	3.32779	PTGER4	3.45444	RWDD3	3.59887
1463	ETF1	4.38222	AKAP8	3.1919	ZNF148	4.03757	IVNS1ABP	3.32752	AQP6	3.45422	UFM1	3.59811
1464	ECI2	4.38217	BYSL	3.18896	PPP1CC	4.03556	PPP1R9A	3.32585	STARD3NL	3.45417	ERFE	3.59801
1465	SCG3	4.38107	LITAF	3.1884	AFF1	4.03328	CLEC11A	3.32579	TFDP2	3.45254	COL8A2	3.59673
1466	HTR7P1	4.38092	WDR31	3.18831	FOSL2	4.03101	CNTNAP2	3.32577	CDC42SE2	3.45211	C17orf67	3.59645
1467	FZD9	4.38059	UBA7	3.18791	HR	4.031	SGSM3	3.32546	MYOM2	3.45164	KIF22	3.59477
1468	C1QTNF3	4.38021	CDHR1	3.18787	ZNF641	4.03097	VDAC1	3.3227	PTPRC	3.45073	LINC01140	3.59426
1469	CTH	4.3799	CENPX	3.18705	IQSEC3	4.03044	SUSD4	3.32238	ALYREF	3.45057	DNAJB11	3.59321
1470	HDGFL3	4.37772	TSTD1	3.18699	ADAM8	4.03022	ARL5B	3.32013	GAS5	3.44964	PLPPR2	3.59196
1471	TMEM107	4.37722	GIMAP2	3.18503	NCEH1	4.02841	KCNF1	3.3183	TUNAR	3.44955	ZNF185	3.59021
1472	DEAF1	4.37577	SOD1	3.18398	TEDC2	4.0267	SLC5A11	3.31744	FAM181B	3.44924	ZNF575	3.58998
1473	LINC01547	4.37499	RGS1	3.18359	CYB5D1	4.01921	TRAK2	3.31695	LOC145783	3.449	F3	3.58659
1474	NAA10	4.37454	HPGD	3.18314	POLR1D	4.01882	GPER1	3.3163	RPL23A	3.44795	TP53I3	3.58657
1475	MAPK8IP1	4.37354	FIP1L1	3.18309	ZFP14	4.01731	NDUFAB1	3.31595	TMEM64	3.44576	WDR54	3.58653
1476	TDRD9	4.37175	SYNM	3.18297	PCDH11Y	4.01653	FH	3.31519	ATP9A	3.44507	NOP56	3.58604
1477	CRNDE	4.37154	BSPRY	3.18109	PPL	4.0159	GNAS	3.3148	RARRES3	3.44506	GLTPD2	3.58537
1478	LOC644936	4.36934	SYTL3	3.18038	MYNN	4.01559	ZHX1	3.31478	CD38	3.4445	ELP4	3.58386
1479	L3MBTL4	4.36906	MXRA8	3.17773	PBRM1	4.01524	ACYP2	3.31324	TSPO	3.44434	ZCCHC12	3.58262
1480	NBAS	4.36888	ARPP19	3.17735	MTAP	4.01394	ID3	3.31202	UBA1	3.44352	LINC02550	3.58137
1481	PTRHD1	4.36765	LRRC73	3.17719	GADD45B	4.01377	LINC00672	3.31079	TMEM234	3.44139	LTBP4	3.58099
1482	COL16A1	4.36685	LYRM1	3.17707	CPEB3	4.01372	PLCH1	3.31028	DPH2	3.43569	CBX2	3.58082
1483	DMAC1	4.36682	NRAS	3.17434	LINC01106	4.01263	PLBD1	3.30915	MRPL52	3.43377	TAPT1	3.58063
1484	TYMP	4.36615	RPLP1	3.17317	BBS1	4.01252	GPD1L	3.30704	LCAT	3.43026	GNAQ	3.58055
1485	CCT6B	4.3654	CMAS	3.17273	LGI2	4.01126	ALDH1A3	3.30534	ARHGDIG	3.42981	PTPRZ1	3.57896
1486	YTHDF2	4.36423	FZD8	3.17187	HTR2A	4.01004	CCK	3.30486	LOC100240735	3.42899	CDH4	3.57592
1487	LRMDA	4.36406	CDC42BPB	3.17115	CXorf56	4.00736	SEH1L	3.30378	HDC	3.42836	MATN2	3.57075
1488	ARHGEF28	4.36338	GNG4	3.17114	NUDT15	4.0052	PLXDC1	3.29927	BORCS5	3.42806	SLC16A2	3.5707
1489	SEC14L2	4.36003	RAB3IP	3.17081	LONRF3	4.00518	SV2B	3.29917	ROBO3	3.42663	LAMTOR4	3.56989
1490	FYCO1	4.35765	CH25H	3.16805	APOL2	4.00438	COMMD10	3.29825	LAMTOR4	3.42607	MPRIP	3.56962
1491	NAA35	4.35531	TMEM64	3.16763	HSD11B1	4.00415	CARNS1	3.29757	CHST14	3.42501	MTMR3	3.5692
1492	MSN	4.35325	ZNF710-AS1	3.16752	ALDH18A1	4.00255	TF	3.29708	ECHS1	3.42488	CCEPR	3.56838
1493	ADCY7	4.3504	PSMA6	3.1671	SCN4B	3.99938	SFXN1	3.29658	TUBB6	3.42304	SRP14	3.5673
1494	GPR68	4.34582	PARP1	3.16686	SYNE1	3.99866	LIPA	3.29483	GABARAP	3.42185	THBD	3.56675
1495	CDH9	4.34251	SPATA20	3.16613	TTC25	3.99577	MED22	3.29439	STX4	3.42116	CA10	3.56674
1496	ARMC10	4.33988	ZFP36L2	3.16457	PHAX	3.99489	NCEH1	3.29434	GAP43	3.42073	HIBCH	3.56162
1497	GPM6A	4.33948	ZC3HAV1	3.16452	ZNF34	3.99378	ADCYAP1	3.29228	EEF1A1	3.42065	NOVA2	3.56042
1498	LCAT	4.33942	NUDT2	3.16441	FAM35BP	3.9922	DYNC1I1	3.29151	LPP	3.42026	FAM131C	3.55737
1499	SAP30BP	4.33843	TNIK	3.16405	PIP5KL1	3.99156	CUTC	3.2887	FAM19A1	3.42016	CALD1	3.55719
1500	GRB14	4.33265	MYL12B	3.1618	GRM7	3.98944	NDUFB8	3.28828	RETREG1	3.41982	MPEG1	3.55672
1501	MANEAL	4.33023	MTSS1	3.16165	LINC-PINT	3.98861	DMBT1	3.2859	ARL8A	3.41852	NPB	3.555
1502	RPS15A	4.32705	RPAP3	3.1614	ZNF548	3.9856	BAMBI	3.28579	FCGR1B	3.41799	ARFIP1	3.55274
1503	RUBCN	4.32546	DPYSL5	3.16082	ALDH1A3	3.98206	NOMO1	3.28541	FERMT2	3.4177	PTRH2	3.5524
1504	TCTA	4.32442	KIAA0368	3.15888	TSTD2	3.98192	SRSF7	3.2848	SQOR	3.41738	SRD5A3	3.55137
1505	TEKT2	4.32383	CTR9	3.15594	GON7	3.98174	OSTF1	3.28387	DNALI1	3.41531	CFAP97	3.55026
1506	P2RY6	4.32285	RPL13	3.15494	ZNF317	3.98093	TMEM64	3.28043	ITGB8	3.41417	KRBOX4	3.54933
1507	SKAP2	4.31957	SMIM15	3.1545	STX6	3.97833	SLC25A46	3.27917	GNAI2	3.41392	MEIG1	3.54815
1508	RSPO4	4.3186	CACNG3	3.15342	LEAP2	3.97582	PRR5L	3.27869	MRPL37	3.41322	TRIM8	3.54671
1509	RPL23	4.31642	UBR1	3.15326	PARM1	3.97429	GDF10	3.27706	ABHD12B	3.40898	PUM1	3.54619
1510	CANX	4.31633	GSTM2	3.15306	FAM118A	3.97297	SLITRK5	3.27616	IDI1	3.40873	2011-09-01	3.54439
1511	TMEM47	4.31318	A1BG	3.15156	JRK	3.97281	ATP6V1F	3.27608	CXXC4	3.40844	DMD	3.54327
1512	HLA-DMA	4.31145	MDH2	3.15149	LMTK2	3.97221	PCDHB4	3.27595	TBCA	3.40614	F12	3.54302
1513	RAB10	4.31111	SPG7	3.15047	NME5	3.97165	PPM1A	3.27509	WIPI2	3.40591	ZNF438	3.54103
1514	POLR2J	4.31019	SIGIRR	3.14943	LPAR5	3.97103	CTU2	3.27473	STBD1	3.40421	UHMK1	3.54036
1515	CELF4	4.30886	ITM2B	3.14925	ADAM20	3.96871	KIF21A	3.27434	RHOJ	3.40371	DUSP9	3.53918
1516	EFNB1	4.3078	ACAA1	3.14923	EIF5	3.96858	TPD52	3.27367	NECTIN2	3.4028	CINP	3.53752
1517	CAMKV	4.30405	MSRB2	3.14775	UTP23	3.96811	STC2	3.27334	VSTM2B	3.40207	SNHG5	3.53731
1518	ALPL	4.30396	C2orf69	3.14708	RSC1A1	3.9675	MIEF1	3.2725	FAM96A	3.40113	GNPTAB	3.53712
1519	MPI	4.30241	TPM3P9	3.14704	DAPK3	3.96501	HLF	3.27227	PAXBP1-AS1	3.39954	DOC2A	3.53661
1520	NLE1	4.30178	RHCG	3.14626	CEP135	3.9643	SPPL2A	3.271	POLR2J	3.39923	NWD2	3.53591
1521	MACROD2	4.30069	AZIN2	3.14601	EMC3-AS1	3.96377	SLFNL1	3.27048	CDH11	3.39862	LOC145783	3.53522
1522	HCK	4.2965	HES1	3.1457	ARAP3	3.95941	EPHB3	3.26953	HDAC9	3.39826	FUT9	3.5346
1523	LINC00484	4.29465	FABP5	3.14541	PRDM5	3.95933	RHBDL2	3.26929	SCUBE2	3.39764	DKFZP586I1420	3.53333
1524	DPYSL2	4.29369	LYPD2	3.14381	RHOBTB2	3.95816	R3HCC1	3.26848	DPYD	3.39639	LOC101928424	3.53275
1525	EMP3	4.2936	ECI2	3.14226	PPP2R2B	3.95459	UQCC1	3.26769	LARGE1	3.39413	CHST14	3.53177
1526	NUDT10	4.29183	PNPLA6	3.1408	PCAT19	3.95217	PEMT	3.26416	SEC14L2	3.39404	GNG4	3.53078
1527	TNFRSF14	4.29095	ITGB5	3.13851	ZNF264	3.94954	CYP2E1	3.26415	MYB	3.39392	GHR	3.52976
1528	HSPB11	4.2894	SIRT3	3.13421	L3MBTL3	3.94802	AKAP7	3.26386	RIIAD1	3.3937	ACSBG1	3.52936
1529	F3	4.28936	RNF11	3.13308	IL7R	3.94737	G6PD	3.26263	EHBP1L1	3.39205	C22orf23	3.52869
1530	WNT4	4.28828	PPP2R5A	3.13255	ANKZF1	3.94644	XPO6	3.2624	LHFPL6	3.39069	COG1	3.52602
1531	FAM86C1	4.28758	LAMTOR2	3.1317	WARS	3.94095	CD47	3.26227	SPCS2	3.39059	WDR25	3.5253
1532	CDC14A	4.28757	SHC3	3.13035	EMCN	3.93961	HEG1	3.26125	GSTP1	3.38987	TUBB8P12	3.52489
1533	HNMT	4.2828	BAP1	3.12673	KCTD16	3.93626	NF2	3.26005	SDF2L1	3.38809	SCGB3A2	3.52424
1534	VAT1	4.2813	APLN	3.1254	TBC1D31	3.93584	CALM2	3.25971	RXRA	3.38786	TPST1	3.5216
1535	VIM	4.27992	PHF10	3.12532	SLC25A32	3.93543	VPS35	3.25863	GNPTAB	3.38752	ZNF845	3.52081
1536	TMEM117	4.27934	NANOS1	3.12495	MRPL50	3.93411	S100A6	3.25798	GCSH	3.38723	VOPP1	3.52065
1537	PTHLH	4.27621	RAB35	3.12471	LINS1	3.92948	2002-03-01	3.25788	CCDC110	3.387	ARPC5	3.51868
1538	FOXRED2	4.27397	TM7SF2	3.12398	FASTKD3	3.9291	SATB2	3.2572	PLPPR4	3.38679	MUM1L1	3.51823
1539	SRP14	4.27245	CANX	3.12045	KRT222	3.92881	OPN4	3.25639	ALG14	3.38513	GRN	3.51737
1540	CYP26A1	4.27199	GFAP	3.1203	PSMG2	3.92819	SLC39A13	3.25588	PYCARD	3.38283	TMEM8A	3.51724
1541	ACAD9	4.27017	TUBB4B	3.12027	BRWD3	3.92785	BABAM1	3.25502	CHRM4	3.37833	FYCO1	3.51219
1542	SNX3	4.27	HIGD1A	3.11961	CIZ1	3.92716	SGMS1	3.25393	RPL23	3.37682	APLNR	3.51124
1543	TMEM59L	4.26965	CHST14	3.11588	EPB41L1	3.92697	PCCB	3.25226	ZDHHC4	3.37631	CNGB1	3.50996
1544	USP39	4.26936	FAM181B	3.11573	BMS1	3.92673	SNX10	3.25133	TMEM120A	3.37381	CCT5	3.50861
1545	CIB2	4.26913	OVOL2	3.11479	CITED2	3.92577	TIMELESS	3.24993	IFT27	3.37244	SOX21	3.50646
1546	SHANK1	4.26745	AQP1	3.1132	TTC28	3.92549	ELOVL1	3.24855	ARHGAP1	3.37203	CTC1	3.50543
1547	TOM1L1	4.26742	ATP6V0E1	3.11293	SLC35A4	3.92473	CYR61	3.248	CHCHD6	3.37111	CABCOCO1	3.50392
1548	GHR	4.26725	ERCC2	3.11287	PGBD4	3.92471	TMCC2	3.24754	PPIL6	3.37055	STX2	3.50359
1549	ABCB6	4.26495	TMEM203	3.11167	ZKSCAN4	3.9242	EEF2	3.24709	AMZ1	3.36921	HLA-DPA1	3.50145
1550	FAM162A	4.26226	APOPT1	3.11133	DACT2	3.92381	NDUFAF1	3.24685	CFAP70	3.36903	RPS14	3.49952
1551	STMN4	4.26215	SRP14	3.11126	DESI1	3.92084	E4F1	3.24644	PCCB	3.36743	ZNF677	3.49909
1552	NACA	4.2608	JARID2-AS1	3.11033	RNPS1	3.92069	LOC100506388	3.24552	CHST15	3.36694	GRB14	3.4982
1553	TMEM17	4.25781	DOK1	3.1081	FAM209A	3.91936	C10orf143	3.24373	TMSB4Y	3.36419	ZFHX4-AS1	3.49808
1554	ARHGDIG	4.25768	PSMD1	3.10686	SRARP	3.91735	SLC39A11	3.24355	TAC3	3.36283	MEX3A	3.49744
1555	GPRIN1	4.25692	SAMD15	3.10675	SLC29A1	3.91581	TMEM81	3.24347	DCAF13	3.36248	NCR2	3.49198
1556	LINC00900	4.2551	CLPS	3.10674	SP3	3.91553	SLC35G2	3.24174	FUCA2	3.3621	SQOR	3.49156
1557	TUNAR	4.25507	TAF9	3.10663	TENM4	3.91246	VASH2	3.24119	GNB2	3.36191	TSPAN18	3.49106
1558	TPST1	4.25402	RPL36A	3.10659	MAP2K3	3.9112	UQCRFS1	3.24093	JAML	3.3619	BYSL	3.48669
1559	CHST14	4.25246	EDNRB	3.10471	SDHAF3	3.90941	POU3F1	3.2379	GATM	3.36076	GNAZ	3.48629
1560	TNFRSF11A	4.2521	LINC02076	3.1042	CCDC84	3.9094	UNC80	3.23737	GRB14	3.36007	RTP1	3.4841
1561	CYP2J2	4.25148	COLCA1	3.10403	ZNF541	3.90859	MRPL33	3.23406	EPS8	3.35999	HMGCR	3.48407
1562	TBX19	4.2467	LYPLAL1	3.10384	RND1	3.90818	ZFHX2	3.2338	CSPG4	3.35997	TNS3	3.48214
1563	2011-09-01	4.24554	RNF167	3.10341	ZNF385A	3.90781	GALNT1	3.23352	TMEM9B	3.35876	FREM3	3.48197
1564	BFSP1	4.24363	GPI	3.10256	TAF11	3.90743	CDK6	3.23331	TFEC	3.35817	KANK1	3.48171
1565	ZNF818P	4.24294	LGALS9C	3.10139	CELSR2	3.90648	ANKRD9	3.2311	SLC2A5	3.35596	TMEM263	3.4809
1566	BTNL9	4.24166	LRP10	3.10112	ZNF280A	3.90215	LINC00667	3.22798	CHPT1	3.3553	NPY1R	3.48044
1567	PRR29	4.24097	AIMP2	3.09868	TTC30B	3.9021	RPRD1B	3.22619	SLC25A22	3.35351	GLG1	3.47979
1568	LEPROT	4.24029	PRMT5	3.09773	RDH5	3.90148	PSTPIP1	3.22579	GSTM5	3.35339	C11orf97	3.47727
1569	SNX6	4.23815	ERICH6-AS1	3.09747	MRPL16	3.90143	BAP1	3.22481	MEX3A	3.35328	FZR1	3.47512
1570	ADTRP	4.23569	RPS21	3.09627	SEC23A	3.89792	MAP1A	3.2248	SYNM	3.35267	ACTC1	3.4744
1571	ITM2B	4.23437	TTC23	3.09565	SYNDIG1	3.89691	KCNJ12	3.22333	ZNF277	3.35186	PARP1	3.47412
1572	CRMP1	4.23231	KLHDC8A	3.0949	RAB40C	3.89638	TMEM232	3.22173	RTCB	3.35155	C12orf73	3.47253
1573	PTGES	4.23224	C1orf74	3.09425	RWDD1	3.8957	PLEKHM3	3.22114	SRP14	3.35128	LOC100506100	3.47148
1574	ADRA2C	4.23075	CHPT1	3.09368	SACS	3.89437	OIP5-AS1	3.21827	C19orf38	3.35103	EN2	3.47049
1575	PBXIP1	4.23038	ATP5MF	3.09276	CBX7	3.89191	BAG2	3.21765	SLC27A3	3.34858	TMEM173	3.47031
1576	PDCD5	4.22725	VANGL2	3.09234	UBP1	3.89036	CHGA	3.21688	TLN2	3.34737	DYDC2	3.46934
1577	BAG1	4.22602	WAC	3.08859	PTCHD4	3.89033	TRIM41	3.21595	HHLA3	3.34442	SEC61A2	3.46884
1578	CA10	4.22445	PRMT6	3.08654	NOM1	3.89008	ZSCAN29	3.21497	CFAP97	3.34426	GSTP1	3.46746
1579	NDP	4.22344	TIPARP	3.08629	NAT8L	3.88914	GAREM1	3.2132	LOC101927318	3.34112	RXYLT1	3.46716
1580	GOLT1A	4.22341	KIAA1147	3.08519	FAM76B	3.88825	SKIV2L	3.21239	FAM86EP	3.34077	RMDN1	3.46714
1581	RPS11	4.22055	CLCN5	3.08518	GNPDA2	3.88533	TFDP2	3.21148	PUM1	3.34065	TMEM132A	3.46709
1582	DNAH5	4.21849	PDLIM3	3.08384	WASHC2A	3.88234	RETREG1	3.21041	HLA-DPA1	3.34036	TBCA	3.46687
1583	GFAP	4.21835	MPRIP	3.08343	ERG	3.88068	CTNNBIP1	3.20908	EVI2B	3.34023	TNIP3	3.46652
1584	PYCARD	4.21684	CD38	3.08065	CCDC138	3.88061	ADCK1	3.20852	BAMBI	3.33994	NT5DC3	3.46648
1585	GPR37L1	4.21628	SLC7A7	3.07947	EPHB1	3.88026	KANK4	3.20531	SREK1IP1	3.33751	2004-03-01	3.46546
1586	NAV3	4.21584	YAP1	3.07935	SNAP91	3.87946	EPHB2	3.20526	DPY30	3.33681	DPY30	3.46434
1587	SPARC	4.21268	RPL39	3.07849	PPIL2	3.87696	FAM95C	3.20302	GPR150	3.33622	PDCD5	3.45842
1588	RPL23A	4.21148	FLVCR1-AS1	3.07833	ACTN4	3.87679	SPATA20	3.20185	APMAP	3.33525	TM9SF3	3.45749
1589	PIR	4.21067	KCNK3	3.07665	INSR	3.87649	PPA1	3.2018	C11orf97	3.33221	DBI	3.4558
1590	FANCL	4.21027	STK4	3.07489	EXOC2	3.87639	TMEM204	3.20171	TOLLIP	3.33185	GOLGB1	3.45024
1591	TLN2	4.20949	EIF3K	3.07488	TMEM33	3.87611	STK4	3.20125	EFNB1	3.32955	C14orf132	3.44882
1592	EMX2	4.20917	ARRB1	3.0745	PPIP5K1	3.87501	RNF26	3.19958	ALKAL2	3.32901	CACNA1F	3.44837
1593	TSPAN4	4.20865	SLC39A10	3.07441	ZSWIM5	3.87498	GTF2IRD1	3.19898	CACNG3	3.32897	MDK	3.44574
1594	SASH1	4.20764	MND1	3.07435	MAP3K10	3.87116	PAQR6	3.19821	RAB11A	3.32751	FAM47E	3.44296
1595	ZFAS1	4.20726	HYI	3.07414	ZNF333	3.86681	EMILIN2	3.19764	C5orf30	3.32714	FIGNL2	3.44285
1596	KCTD15	4.20653	ATP6V0CP3	3.07075	DLGAP1-AS4	3.86591	EIF2S2	3.19732	CREB3	3.32683	CLEC9A	3.44128
1597	CABYR	4.20628	FAM173B	3.07003	IGFALS	3.86505	CAB39L	3.19717	IGSF22	3.32642	HIST1H2AD	3.44041
1598	FGD4	4.20568	ZFP69	3.06977	LOC105370333	3.86265	CDK2AP1	3.19686	CLTCL1	3.32564	TMEM51	3.43903
1599	PKIB	4.20546	DNPEP	3.06931	RNFT1	3.86197	GABRG2	3.19625	MDK	3.3248	CCDC148	3.43699
1600	GOLGB1	4.20502	SOX11	3.06571	NUP98	3.86174	LOC729737	3.1952	AXL	3.32339	FCGR1B	3.43691
1601	SLC39A4	4.20445	LYPD1	3.06419	CHML	3.86102	ZC3H7B	3.19462	MOSPD2	3.32023	TENM1	3.43463
1602	RPL39L	4.20364	PQBP1	3.06325	HECW2	3.86077	CHMP4B	3.19236	GLUD1	3.31795	PIPSL	3.4342
1603	GLRA3	4.19991	ALPL	3.06309	UHRF1BP1L	3.85995	GBAP1	3.19101	SLC25A1	3.31684	CCDC153	3.43284
1604	ADRA1B	4.19638	QSOX1	3.06262	MAGEL2	3.85771	POLDIP3	3.19005	CBLN1	3.31479	ME1	3.43153
1605	LINC00595	4.19576	CD6	3.06226	IL17RA	3.85621	CLN6	3.18933	DNAH12	3.31452	RAB22A	3.43079
1606	KRBOX4	4.19566	ZNF827	3.06213	PUDP	3.85459	CCNI	3.18799	ELF4	3.31174	RAB8A	3.42765
1607	OARD1	4.19445	GPR150	3.06194	CDKN2AIP	3.85435	SUPT7L	3.18721	HPGDS	3.31072	ZFR	3.42727
1608	SRM	4.19331	TOMM5	3.06164	PPM1J	3.84742	SLC25A42	3.18706	TMIGD3	3.30896	MYRIP	3.42538
1609	NSMCE1	4.19186	FBXO25	3.06139	ATL2	3.84739	EIF5A2	3.18683	TRABD2A	3.3088	C21orf2	3.42387
1610	RGS1	4.18804	HSPE1	3.05965	CHCHD3	3.84704	CBR4	3.18473	C22orf23	3.30486	PRAM1	3.42386
1611	SGSM2	4.1861	SLC19A1	3.05818	NCOR2	3.84662	ITIH5	3.18359	NOL4L	3.30441	PCBD1	3.42372
1612	KLF8	4.18601	TBC1D9B	3.05792	PDZD8	3.84638	EIF3G	3.18188	CSF1R	3.30312	RHOD	3.42291
1613	ONECUT1	4.18543	OSER1	3.0578	KCTD18	3.84494	FRMD5	3.18117	NFATC1	3.30257	FAM212A	3.42095
1614	CADM1	4.1835	BLNK	3.05657	TCHH	3.8446	ABCG4	3.18065	KLHL25	3.3005	VSIG10L	3.4175
1615	FPR1	4.18343	KCNN3	3.05587	KANSL1	3.84036	DIO3	3.18008	SAP30BP	3.30012	HHIPL1	3.41743
1616	TSKU	4.18211	GCSH	3.05583	HELLS	3.84022	C19orf47	3.17917	HAUS7	3.30005	FAM19A1	3.41721
1617	SLC29A4	4.18176	C1D	3.05301	GFRA2	3.84021	CDKN2AIPNL	3.17794	AQP1	3.29999	PPP1R1B	3.41698
1618	CTSH	4.18176	DOCK8	3.05277	KRTAP5-2	3.84014	MYO1D	3.17766	SGCE	3.29854	ZNF521	3.4145
1619	PTS	4.18159	AP1M1	3.05207	MLLT10	3.83914	HSF2	3.17645	GNG4	3.29818	FAM46A	3.41445
1620	CNRIP1	4.18126	WBP2	3.04971	FGF7P3	3.83888	PRELID1	3.17631	SOX5	3.29808	CASK	3.41319
1621	ZSWIM7	4.17917	TST	3.04871	TIA1	3.83489	SLTM	3.17511	STAG3	3.29765	BABAM2	3.41311
1622	ENY2	4.17821	RETREG1	3.04842	TSPYL4	3.83275	MAIP1	3.17438	MZT2B	3.29709	PIGO	3.41305
1623	DHCR7	4.17811	ADHFE1	3.04812	SV2C	3.83243	OVOL2	3.17287	FCGR2A	3.29704	ACOX3	3.41226
1624	HMOX1	4.1752	ERGIC3	3.04666	ZBTB16	3.83208	TMEM182	3.17087	FAM212A	3.29676	JPH4	3.41172
1625	EPB41L4B	4.17478	GTF2F2	3.0462	TRIM66	3.83007	FGFR2	3.17084	CDH9	3.29568	STARD3NL	3.41118
1626	GSTP1	4.17456	RAB18	3.04507	BOD1L1	3.82867	TRPM2	3.16911	COPZ1	3.29477	PPIB	3.41076
1627	LINC00674	4.1739	NCAPH2	3.0439	C5orf24	3.82626	DMRTC2	3.16877	PHF24	3.29228	DPF1	3.4106
1628	MAOB	4.17245	TMPRSS5	3.04355	VWC2L	3.82545	PLEKHG4	3.1667	NR4A3	3.29192	EIF6	3.40833
1629	ZNF577	4.17214	HSPA8	3.0423	CTTNBP2	3.82469	THAP11	3.16605	WDR25	3.29029	PCK2	3.4069
1630	APOC1	4.17122	CSTB	3.04225	C19orf73	3.82378	ARHGAP44	3.16496	C2orf80	3.28874	PALM	3.40651
1631	VEZT	4.17051	THAP8	3.04176	FAM135A	3.82371	ELOVL6	3.1644	IVD	3.28639	AP3M2	3.40482
1632	RPL27A	4.17037	PIP4P1	3.04143	RGL2	3.82277	APIP	3.16421	CENPF	3.28559	STX1A	3.40419
1633	SGCD	4.1673	CHST6	3.04122	ARID4A	3.82222	SLC39A14	3.16324	SIVA1	3.28537	HRK	3.40413
1634	SSR4P1	4.16682	RTRAF	3.03995	THOC5	3.82027	TIMM21	3.16293	NOVA2	3.28496	STK32C	3.40397
1635	ROBO3	4.16618	ABI1	3.03923	BICD2	3.81973	GAS2L1P2	3.16286	TPPP3	3.28475	TIMP4	3.40049
1636	ABI3	4.16596	OSBPL8	3.03618	MAPK6	3.81826	MPI	3.16227	PLCB2	3.28423	CACNG3	3.39979
1637	TNFSF12	4.16208	NEBL-AS1	3.03613	TSPAN13	3.81752	PELI3	3.15945	CDH10	3.28041	C19orf38	3.39813
1638	STX2	4.16199	CCR5	3.03342	CCDC65	3.81648	TCP1	3.15764	POLE2	3.28008	PNPLA3	3.39529
1639	EMX2OS	4.16186	SRSF12	3.03153	LYST	3.81537	TRPC5	3.15748	RTP4	3.27946	DHDH	3.39453
1640	PPIB	4.16152	PLEKHA4	3.03125	CEP95	3.814	NDUFA4	3.15713	SYNPR	3.27883	PSMG3-AS1	3.39416
1641	ZNF521	4.16083	CALM1	3.02988	CCT6P3	3.81314	PPM1L	3.15534	GAST	3.27821	NICN1	3.39282
1642	CNGB1	4.16033	JUP	3.0297	FGD5	3.81239	ZFYVE19	3.15525	SERTM1	3.27697	ZNF83	3.39067
1643	PPP1R1B	4.16029	SNX17	3.02854	RASIP1	3.81233	KCNC1	3.15253	LOXL3	3.2768	ARHGAP42	3.38607
1644	NDUFA13	4.16012	SH2D2A	3.02735	TMEM45B	3.81136	MADCAM1	3.15232	HLA-DMA	3.2751	SNTA1	3.38548
1645	PSTPIP1	4.15597	GRHPR	3.02691	MOGAT2	3.81075	CAD	3.15152	CHDH	3.27352	PMM1	3.38496
1646	GLT8D2	4.15441	ZNHIT3	3.02652	SCAMP1	3.81062	RNF208	3.14886	PRR29	3.27338	SLC2A10	3.38477
1647	SLC25A1	4.15391	IMMT	3.02585	FAM131B	3.80848	BMS1	3.14875	PXN-AS1	3.2705	WBP4	3.3844
1648	ZFP36L2	4.15274	LINC01094	3.02574	SLC38A3	3.80708	AR	3.14852	TM9SF3	3.26827	SIRPA	3.38348
1649	TAMM41	4.15115	C1orf198	3.02533	KIAA0753	3.80627	SLC6A8	3.14843	MTA3	3.26738	HHEX	3.38289
1650	MTMR9LP	4.15094	TAGLN3	3.02493	MRPS36	3.80145	LOC100130691	3.14755	HDAC11	3.26625	TMEM94	3.3803
1651	PGRMC1	4.14955	CTSD	3.02434	ACTR5	3.79862	VPS28	3.14693	DTNBP1	3.26545	RSPO3	3.37974
1652	CMSS1	4.14939	LINC02482	3.02342	EFCAB7	3.79852	VPS9D1	3.14438	MRPL53	3.2651	GTF3C6	3.37677
1653	PDGFA	4.14794	AQP6	3.0231	MRPS11	3.79659	COX15	3.14241	RWDD3	3.26258	CYP2J2	3.37049
1654	SAP130	4.14631	HIST2H2BE	3.02026	ZNF268	3.79342	EFR3A	3.14226	GPR37L1	3.26061	LRRC56	3.36909
1655	SDF2L1	4.14555	LIMA1	3.02023	CKAP2	3.79172	TMEM141	3.14188	PDS5A	3.26026	PTCHD1	3.36883
1656	DBI	4.1421	PLA2G16	3.01943	DCAF13P3	3.79111	ADARB2-AS1	3.13871	MRC1	3.25783	EMX2OS	3.36764
1657	BPHL	4.14187	TUNAR	3.01898	EIF4E1B	3.78801	TPI1P2	3.13833	PITPNM2	3.25775	CSF2RA	3.36762
1658	RNF182	4.14075	R3HCC1	3.01858	WSCD2	3.78727	PDSS2	3.13805	NAV3	3.25725	SMPD1	3.36631
1659	KLF10	4.14046	EPS8	3.01832	TBX1	3.78674	MDH2	3.13694	ZNF827	3.25632	RHOJ	3.36601
1660	ACP1	4.1402	TMC8	3.01503	COPB2	3.78547	NGDN	3.13678	FOXJ3	3.25423	GPR27	3.3658
1661	PSMB10	4.13796	TTPAL	3.01398	BTN2A2	3.78464	SLC25A6	3.13618	TBL3	3.25346	PARP14	3.3642
1662	SFRP1	4.13768	FAM105A	3.01376	RIMS4	3.78203	LRRC75B	3.13489	SLC40A1	3.25276	VLDLR	3.3624
1663	KCNG3	4.13645	MRC1	3.01335	CPLX2	3.78183	SUCLG1	3.13377	GCNT1	3.2521	TP53I11	3.36233
1664	LSP1	4.13494	UQCRFS1	3.01143	MBD2	3.78178	ARMC6	3.13232	VRK1	3.2513	GALM	3.36183
1665	KCNA5	4.12693	CDC42SE2	3.01084	DAXX	3.78059	IP6K3	3.13152	LOC105378853	3.25123	RPL13AP3	3.35959
1666	EPHX1	4.12662	PPP5D1	3.01009	ZNF782	3.7785	GPS2	3.13043	RHOD	3.24944	DTNBP1	3.35896
1667	DNAH2	4.12634	ITGB4	3.01001	SUN1	3.77466	TTLL11	3.12994	GABRA3	3.24929	ACVR2A	3.35796
1668	CNTN1	4.12396	IMP4	3.00901	SMIM13	3.77331	ST3GAL3	3.12931	UFD1	3.24761	NEURL1B	3.35652
1669	CRYM	4.12388	BCRP2	3.00728	GAPVD1	3.7729	ODC1	3.12765	LINC00958	3.24667	PDHB	3.35491
1670	USE1	4.1238	RMND5B	3.00692	GDAP2	3.77251	GSK3A	3.12606	ITGB4	3.24653	TSPO	3.3529
1671	NDUFC2	4.12344	C1GALT1	3.00575	NAA16	3.77242	RC3H1	3.12582	CHP2	3.24599	NFATC1	3.35281
1672	KLHDC4	4.12182	NWD1	3.00573	MICAL3	3.77173	ARTN	3.12536	TANGO6	3.24523	PALD1	3.352
1673	POC1A	4.12096	APTR	3.0049	VPS41	3.76886	WDR7	3.12451	SCG3	3.24468	NDUFA6-AS1	3.35058
1674	SPON2	4.11499	MAN1B1	3.00486	CDR1	3.76818	TUBB3	3.12387	KIAA1024	3.24455	MGAT4B	3.3503
1675	ZFP69	4.11436	BRMS1L	3.00104	KIAA1586	3.76709	TRPM4	3.12383	DRAM1	3.24343	UBB	3.34855
1676	LHX2	4.1141	PMP2	2.9997	ATP11B	3.76549	CDKN1B	3.12246	LCLAT1	3.24281	C16orf95	3.34751
1677	PEMT	4.11232	KRT17	2.99773	ELMOD3	3.76477	SH2D2A	3.12121	DKK3	3.24249	FAM200B	3.34629
1678	CACNG4	4.11159	C1GALT1C1	2.99747	BTBD3	3.76448	LDHA	3.1189	KLF15	3.24136	WISP2	3.3448
1679	DMD	4.11084	HEMK1	2.99742	CCDC88B	3.76346	TMEM186	3.1187	TSPOAP1	3.24031	USE1	3.34383
1680	GS1-124K5.4	4.11062	LOXL1	2.99679	C19orf25	3.76133	SNU13	3.11829	SP5	3.23975	ZSCAN5A	3.34376
1681	TDRKH	4.10985	FAM86DP	2.99497	RAB11FIP3	3.7607	IPCEF1	3.11802	ATOH7	3.2391	TUBB2A	3.34332
1682	CERS4	4.10897	UBE2M	2.99413	EML6	3.76066	MRPL48	3.11698	HSD17B14	3.23896	SERTM1	3.34329
1683	GAP43	4.10886	CABYR	2.99384	ZNF543	3.759	ARF6	3.11694	JMJD4	3.23896	FAM162A	3.34272
1684	RMDN1	4.10406	DTYMK	2.99334	STAM2	3.7582	LSS	3.11687	C12orf60	3.23894	LRRN1	3.33771
1685	ACAT1	4.10163	SCPEP1	2.99307	CCDC136	3.75601	KPNA4	3.11643	DBI	3.23889	FBXW9	3.33677
1686	PERM1	4.10128	SNF8	2.99191	DOPEY2	3.7535	ID2	3.116	NUDT11	3.23847	DHRS2	3.33552
1687	CYBA	4.0996	LNPK	2.99171	KIAA0391	3.75191	ADAP1	3.11524	TMEM173	3.23735	KLF6	3.3346
1688	SMPD1	4.09864	WISP2	2.9913	GRM4	3.75142	TBRG1	3.11428	VSIG10L	3.23723	SP5	3.33455
1689	CD163	4.09801	FAM129B	2.99107	TRMU	3.75133	ASPHD1	3.11399	NOL4	3.23697	PIR	3.33388
1690	MVD	4.09755	NPY1R	2.99077	IFI27	3.74909	PACRG-AS3	3.11254	EEF1AKMT1	3.23643	WIPI2	3.33326
1691	HBM	4.0964	ITGB7	2.99038	ERC2-IT1	3.74669	PPIAL4G	3.11136	CD53	3.23409	RPL34	3.33244
1692	RAB40B	4.09565	PPP2R5C	2.9897	PRDM8	3.74557	PCDHB16	3.11094	ARMC10	3.23252	VEZT	3.33156
1693	LIN7B	4.09506	PROCA1	2.98966	ZDHHC18	3.74398	SLC25A12	3.1104	MYH7	3.23222	IFT27	3.32996
1694	BCRP2	4.09362	ZMAT1	2.98833	SESN2	3.74019	MOBP	3.11032	PCDH8	3.23191	CYP46A1	3.32887
1695	RPL9	4.09276	VTI1B	2.98806	LOC653080	3.73847	ABCA3	3.10933	SERPINA1	3.23042	PRKD3	3.32846
1696	GSS	4.09215	PIN1	2.98587	PAQR9	3.73841	FDPSP2	3.10858	CDC34	3.22935	NISCH	3.32828
1697	SERTM1	4.08899	GSTP1	2.98524	2006-03-01	3.73775	BID	3.10471	C2CD2L	3.22925	RAB33B	3.32796
1698	MAF	4.0886	GDPD2	2.98509	REEP1	3.73553	NKX2-2	3.10451	SC5D	3.2263	GNB2	3.32764
1699	PLPP4	4.08768	ACOX3	2.98475	ANKRD17	3.73524	AUP1	3.10419	ZFAS1	3.22429	CD6	3.32617
1700	METTL7A	4.08458	DCP2	2.98304	MYOZ3	3.73489	DCLK1	3.10337	TIMMDC1	3.2241	FBLN2	3.3227
1701	HMGCR	4.08358	GRSF1	2.98151	FAM167B	3.73433	ZFPM2	3.10307	CRMP1	3.22377	MZT2B	3.32094
1702	JMJD4	4.08171	PLCH1	2.98067	KIF4B	3.73021	ACTR2	3.10222	LTC4S	3.22248	OR7E14P	3.31777
1703	HPGDS	4.08098	BAIAP2L2	2.9806	SLC5A3	3.72928	KRTAP5-6	3.1022	NUDT16L1	3.22233	EXOSC8	3.31754
1704	DERA	4.0801	GOLT1A	2.97784	SPEF2	3.72605	ZC4H2	3.10076	TENM3	3.22121	MAF	3.31692
1705	PCDH15	4.08006	ZNF826P	2.976	ADGRL1	3.72552	POLR2K	3.1001	OR7E14P	3.21944	CALR	3.31372
1706	GLI1	4.07906	MEPCE	2.9756	TMEM178A	3.72327	FAM210A	3.09976	ARHGAP31	3.2189	ADAMTS9	3.31355
1707	LINC00937	4.07905	ARHGEF4	2.97513	BASP1-AS1	3.72166	TMEM59	3.0987	ZFYVE1	3.21847	RPL13A	3.31336
1708	EHBP1L1	4.07782	TMEM106C	2.97496	FBXO3	3.72058	CFAP36	3.09806	BTNL9	3.21797	MRPL52	3.3128
1709	FAM86FP	4.07652	PAK3	2.97493	LINC00473	3.72044	SRGAP2	3.09784	NISCH	3.21677	MYH7	3.31274
1710	TMEM8A	4.07628	NUPR1	2.97459	WDR37	3.72016	SURF4	3.09644	LINC00900	3.21607	FAM126A	3.3104
1711	FAS	4.07322	ME3	2.97452	PNKD	3.71668	NAGS	3.09627	CDC27	3.21593	GULP1	3.30965
1712	MEIG1	4.07321	KRAS	2.97435	NFATC2IP	3.71554	PQBP1	3.0949	KIF17	3.21578	TMEM209	3.30958
1713	TMEM170A	4.0727	SH2B3	2.9741	CNOT1	3.7149	TOMM40	3.09402	NUS1	3.21312	NUDT16L1	3.30881
1714	SNTA1	4.07243	NDUFB3	2.97391	MCU	3.71406	KNOP1	3.09401	DYRK3	3.21306	AHNAK	3.30828
1715	NPHS1	4.07157	GRB14	2.97376	C16orf45	3.71271	CTSK	3.09148	CNRIP1	3.21266	ALG14	3.30719
1716	SMIM15	4.07125	2001-03-01	2.97284	ZNF592	3.71134	MRPL40	3.09036	AGT	3.21195	HPCAL1	3.30369
1717	COL4A1	4.07081	SLC9A6	2.97167	LURAP1L	3.71126	CCNE1	3.09032	NENF	3.21117	TMEM59L	3.29934
1718	PDS5A	4.07017	GPR183	2.97043	FBXL6	3.70742	FECH	3.0897	LZTR1	3.20941	SORBS2	3.29909
1719	MAN1A1	4.07014	GLI3	2.96996	DDHD2	3.70658	NDUFB5	3.08825	AP5S1	3.20928	CDKN1A	3.29872
1720	PARP14	4.07005	LOC440434	2.96705	PREP	3.70501	ACAD9	3.08817	OTOS	3.20673	TP53INP1	3.29857
1721	MEX3A	4.06973	CACYBP	2.96623	SNCB	3.70495	ZIC1	3.08525	CHODL	3.20582	SERPINF1	3.29532
1722	CREM	4.06763	BMP7	2.96538	KIF9-AS1	3.70491	RNF130	3.08317	BSPRY	3.20569	SLC27A3	3.29444
1723	SNRPG	4.06381	RXRA	2.96326	ZNF155	3.70294	TRIM58	3.08296	CLEC14A	3.2032	CNIH2	3.29428
1724	FBL	4.06367	CSGALNACT1	2.96193	AASDH	3.70286	SPOCK3	3.08175	LINC01554	3.20221	RAB31	3.29268
1725	RIBC1	4.06365	ALYREF	2.96123	VWA8	3.70254	LZTR1	3.08109	TST	3.20107	LINC01480	3.29187
1726	SAMD9L	4.063	ERICH1	2.96023	LYPLA1	3.70204	IFFO1	3.07675	GABBR1	3.20035	FOXF2	3.28966
1727	CLEC9A	4.06197	PSMB5	2.95967	MOSPD1	3.70035	SNAP47	3.07618	NAXE	3.19947	DHRS12	3.28754
1728	LINC01176	4.06109	BAG1	2.95835	AFTPH	3.69829	NAB2	3.07437	FN3KRP	3.19903	TNFSF12	3.28711
1729	ACSBG1	4.05937	ST20	2.95801	SNW1	3.69801	ATP5PB	3.07434	PHYHD1	3.19862	FCHSD2	3.28629
1730	DPF1	4.05886	STUB1	2.9578	MAGI3	3.69642	ZNHIT3	3.07432	HECTD2	3.19827	PRKD1	3.28555
1731	MTMR3	4.05721	NDUFA6	2.95774	SAC3D1	3.69183	PAF1	3.07396	ZFP36L2	3.19652	PLD4	3.28464
1732	PIRT	4.05643	FKBP1A	2.95741	EFNA5	3.69059	EMB	3.07291	AHRR	3.19601	ARHGAP31	3.28338
1733	DMGDH	4.05544	FAM213B	2.95711	CNBP	3.69036	TUBA4B	3.07215	OVOL2	3.19593	UQCR11	3.2832
1734	EIF6	4.05509	DDR1	2.95704	SOGA3	3.68927	ARHGEF16	3.07046	ARRB1	3.19185	LPCAT2	3.28264
1735	SNHG5	4.05433	TBX19	2.95426	LINC00667	3.68901	AATK	3.07043	AP2B1	3.19142	ECH1	3.28219
1736	LFNG	4.05296	FGFRL1	2.95368	CHST12	3.68892	HSPB6	3.07038	LILRB4	3.18795	KIAA1024	3.28191
1737	PHF20L1	4.05274	CC2D2B	2.95365	ZNF92	3.68871	USP6	3.0699	DPYSL5	3.18689	LINC00900	3.28141
1738	PACSIN1	4.05193	TTLL1	2.9532	FKBP7	3.68778	MYLK	3.06981	S100A2	3.18609	ACADL	3.2813
1739	C12orf73	4.05164	IGFBP5	2.95231	CAMK2N2	3.68562	DLC1	3.0679	PLD4	3.18556	CELF4	3.28005
1740	LTBP4	4.0515	ANKRD30B	2.95002	ANKRD20A4-ANKRD20A20P	3.68282	GAL3ST1	3.06724	PTCH1	3.18537	ATXN10	3.27936
1741	ERMARD	4.05004	EML3	2.94914	INTS6L	3.6828	PIM3	3.06674	MND1	3.18517	AKAP8	3.27737
1742	WDR77	4.04859	FOXG1	2.94879	KIAA1257	3.68267	TSR2	3.06597	RAB33A	3.18468	ROBO3	3.2773
1743	GCNT1	4.04753	CASP1	2.94828	PCDHGB4	3.68192	CACNA2D3	3.06378	SMIM10L2A	3.18203	CPNE2	3.27559
1744	SLC15A2	4.04694	TGFBI	2.94819	C4orf3	3.68052	NFKBIB	3.06333	AMZ2	3.18111	LINC00958	3.27514
1745	APMAP	4.04583	RPL23	2.94784	C3orf18	3.67916	MIR600HG	3.06163	FADS1	3.18101	DIRAS3	3.27418
1746	TUBB8	4.04458	MVK	2.9478	SYT3	3.67843	EMC1	3.06058	XKR4	3.18063	CELF5	3.27341
1747	LSM5	4.04372	FABP6	2.94755	MAML3	3.6777	GFRA2	3.05924	PSMD4	3.18053	FAM189A2	3.2703
1748	MCTP1	4.04345	RGMB	2.9475	TIGAR	3.67698	CNEP1R1	3.05915	CETN2	3.1803	TMEM107	3.26902
1749	NAXE	4.04318	TMEM238	2.94682	ZNF415	3.67674	CPEB3	3.05901	DDX10	3.17969	NUDT11	3.26843
1750	BRK1	4.04222	LOC107984035	2.94493	SAA2	3.67367	GS1-124K5.11	3.05886	PI4KA	3.17689	CASP6	3.26777
1751	FAHD2A	4.04108	PDHA1	2.94399	SPIDR	3.67156	TUBA1A	3.05853	MTMR9LP	3.17455	TENM3	3.2676
1752	RASL11B	4.04079	LCAT	2.9439	RUNX2	3.67155	ZFAND2A	3.0569	GNG3	3.17448	NUMBL	3.26411
1753	METTL5	4.04076	MUT	2.94356	METTL3	3.66951	B3GALT2	3.05686	SH2D5	3.17326	NR2E1	3.26292
1754	PLEKHA4	4.0384	LRRN1	2.94219	ZNF252P	3.66889	PGAM4	3.05678	TBC1D26	3.17168	LRRC36	3.26206
1755	CYTL1	4.03778	FAM213A	2.94213	CDK11A	3.66786	NME7	3.05634	LTBP4	3.17129	C2CD2L	3.2586
1756	ZSCAN5A	4.03714	SNAP47	2.93955	CALML4	3.66481	CCDC102B	3.0561	THTPA	3.16947	TSPAN11	3.25826
1757	MOV10	4.03641	SLC1A2	2.93862	SCYL2	3.66375	GCLC	3.05584	SMIM10L2B	3.16904	PACRG	3.25767
1758	BLVRB	4.03581	SYTL4	2.93856	FAM133DP	3.66111	ISLR	3.05574	TCTA	3.16903	SETD9	3.25597
1759	C2orf69	4.02854	PSMD2	2.93852	MICB	3.66077	VPS25	3.05565	VOPP1	3.16598	SLC40A1	3.25565
1760	FAM167A	4.02797	HLA-DRB5	2.93837	CCDC152	3.65786	C2orf88	3.05472	SLC16A2	3.16569	CRMP1	3.25535
1761	CD74	4.02758	SEC14L2	2.93797	TMEM161B-AS1	3.65623	PRKAR1B	3.05471	RHOC	3.16407	CGREF1	3.25469
1762	HECTD2	4.02708	TRAM1L1	2.93663	ZNF10	3.65556	DRG1	3.05319	MEIG1	3.16382	FAM117A	3.2538
1763	RSPH1	4.02696	LSS	2.93592	SPHK1	3.65357	CKAP2	3.05294	MGLL	3.16367	ENO1	3.2538
1764	C21orf2	4.02691	CD248	2.93454	FOCAD	3.65214	LGALS8	3.05285	TNIP3	3.16289	MOSPD2	3.25317
1765	ACSF2	4.02523	HSPA9	2.93344	DEXI	3.65167	CTNNBL1	3.05281	IDNK	3.16276	FUCA2	3.25201
1766	CHRM4	4.02455	MAST3	2.93195	EPB41L3	3.64635	KIF13B	3.05212	ZCCHC12	3.16023	CNOT6	3.25077
1767	GPR88	4.02368	TRIM36	2.93186	ISPD	3.6461	AGPAT3	3.05129	TMEM130	3.15833	ARL8A	3.25023
1768	OTOS	4.02193	ID4	2.93125	CEP85L	3.64504	TTC39A	3.05073	SLC4A4	3.15797	CFAP44	3.24708
1769	SWAP70	4.01911	FFAR4	2.9301	CMBL	3.64493	SIRT7	3.0507	JAZF1	3.15723	MTA3	3.24654
1770	DHRS2	4.01639	STXBP3	2.92926	KLF13	3.64407	ZNF780A	3.05069	SMIM30	3.15567	PXN-AS1	3.24549
1771	H3F3C	4.01281	EZR	2.9274	EPHA3	3.64211	SELENOP	3.05065	SCIN	3.15546	COL16A1	3.24526
1772	RIC8A	4.01182	SPICE1	2.92605	RAPGEF6	3.64193	DDX56	3.0505	APLNR	3.15524	TNNI3	3.24388
1773	RPLP0	4.01041	B3GALT5-AS1	2.92514	AZI2	3.64179	TMEM201	3.05037	TSPAN18	3.15391	KLF15	3.24326
1774	WNT7B	4.00997	INPP4A	2.9232	SNAPC4	3.63977	CPT1A	3.04921	ADGRB3	3.15346	MRPL44	3.24149
1775	ME2	4.00635	WDR13	2.92299	IP6K2	3.63913	PNMA1	3.04704	SIGLEC11	3.15269	EME2	3.24083
1776	ASL	4.00589	BAMBI	2.92261	VMP1	3.63728	FCRLB	3.04641	ACADL	3.15192	PAOX	3.24029
1777	GRM1	4.00293	LINC00294	2.92166	SLMAP	3.63705	RASD1	3.04596	DUSP3	3.15111	GSKIP	3.24017
1778	LOC441052	4.00143	KYNU	2.92113	CHD1	3.63413	PAPD5	3.045	KLC1	3.15043	TIMP1	3.23976
1779	ADAMTS8	4.0005	KLRC1	2.92112	ACSL3	3.6338	USPL1	3.04449	NTSR2	3.14923	SLC26A4-AS1	3.23967
1780	CXADR	3.99808	LPP	2.92073	SMG7	3.63308	CASC1	3.04395	HLA-DRB1	3.14915	SLC15A2	3.23913
1781	NOL4L	3.99796	WDR83	2.9202	MDH1B	3.63305	ESRRA	3.04199	CDT1	3.14776	VIT	3.2369
1782	DDB1	3.99647	DBI	2.91995	RGS7BP	3.63145	PPP2CA	3.04116	RIDA	3.14714	ENOX2	3.23641
1783	HIBCH	3.99458	HMOX1	2.91951	TXLNGY	3.63103	PCYT2	3.04094	GRHPR	3.14686	TMEM219	3.23606
1784	KCNMB1	3.99436	SPINT2	2.91824	CCNT1	3.63066	SV2A	3.04007	PIRT	3.14616	CCIN	3.23606
1785	HIST1H2BC	3.99435	PLA2G7	2.9177	DUSP8	3.63011	SESN2	3.03964	ADGRV1	3.1417	MGRN1	3.23553
1786	ZDHHC4	3.99412	LIX1L	2.91732	TAP2	3.63009	STAU1	3.03949	GTDC1	3.14133	EML3	3.23412
1787	ADAMTS9	3.99189	NDUFC2	2.9159	RRN3P3	3.62957	EIF2B4	3.03899	SAMD4B	3.14035	DACH2	3.2317
1788	DDIT4L	3.98898	DCAF5	2.91527	SHROOM2	3.62907	NAPG	3.03827	HSD3B7	3.13944	CDH11	3.23128
1789	ECHS1	3.98889	ST6GALNAC5	2.91461	MKRN7P	3.62774	PPP1R12A	3.03798	GPC4	3.13884	EGLN1	3.23082
1790	GIT1	3.98686	B9D1	2.91457	JMY	3.62746	TTC12	3.03733	CBX2	3.13884	ZNF93	3.23062
1791	CHPT1	3.9858	STRAP	2.91388	TRAF3IP1	3.62739	AHCYL2	3.0372	2001-03-01	3.13588	VSIG4	3.22972
1792	WDR13	3.98573	DNAH2	2.91266	ZNF658B	3.62709	DYNC1I2	3.03704	IGFN1	3.13586	ACOX1	3.22866
1793	CMAS	3.98536	ITGAM	2.91262	IPO5	3.6258	HIRIP3	3.03528	MSN	3.13573	MPI	3.22665
1794	RTP1	3.98487	MS4A7	2.91227	KIAA0586	3.6248	DCTN3	3.03246	FLOT2	3.13556	ENO1-AS1	3.22636
1795	INSM1	3.98405	CHRM4	2.91197	C17orf75	3.62467	PCP4	3.03048	LINC00467	3.13525	FRMPD3	3.22483
1796	MKL2	3.98388	TOMM7	2.91055	NPY2R	3.62314	NRCAM	3.03041	JPH4	3.13472	ARHGDIA	3.22461
1797	PALD1	3.9835	ACTA1	2.91021	REV3L	3.62234	BMP6	3.02838	KIF22	3.13351	WFDC3	3.22315
1798	BMP2K	3.98296	PGAM1	2.90943	DOK3	3.62216	CDH18	3.02767	CPNE2	3.13275	DKK3	3.22277
1799	FAM171A2	3.98086	BCL11B	2.90917	TACC3	3.62175	DHRS11	3.02334	GDF10	3.13124	PLD6	3.22135
1800	YWHAH	3.98075	UBE2B	2.90838	HIST1H4E	3.62167	MEDAG	3.02334	LDHA	3.13037	APTR	3.22007
1801	ST20	3.98035	RAB3GAP1	2.90747	FAAH2	3.62054	SERTAD4-AS1	3.02332	SYT10	3.12994	PRMT2	3.21928
1802	RBFA	3.97958	DNASE1L1	2.90699	HSD17B11	3.61879	CCDC80	3.02283	DCAF5	3.12993	NDUFA13	3.21927
1803	RAVER2	3.97737	ESD	2.90587	CCDC69	3.61829	VWA3A	3.02215	DYRK2	3.12969	PLXNA3	3.21883
1804	ARFIP1	3.97718	PSMB10	2.90558	NDUFAF6	3.61787	PPP3R2	3.02197	GALNT17	3.12864	TTC23	3.21819
1805	TENM3	3.97347	DYNC1I2	2.90358	PEX1	3.61731	RGMA	3.02069	PPP1R1A	3.1279	ASIP	3.21763
1806	COPZ1	3.97203	BCHE	2.90275	SMCHD1	3.61698	TPMT	3.02048	TUBB8	3.12683	RIBC1	3.21749
1807	RPL13AP3	3.97133	ERMARD	2.90171	FBXL17	3.61567	RNH1	3.01988	POMGNT2	3.126	GGACT	3.21678
1808	ARL15	3.97111	SIN3B	2.90092	ZFAND1	3.61514	SLC25A52	3.01855	SNHG5	3.12518	TUBB6	3.21414
1809	KCNMB2	3.97084	RBP1	2.90025	SP9	3.61481	SEZ6L2	3.01756	KRT86	3.12409	TSPAN33	3.21411
1810	TENM1	3.96939	YJEFN3	2.89754	BACH2	3.61343	MAPK8IP2	3.01749	PCDHB4	3.12272	LRRC75A-AS1	3.21045
1811	TMSB4Y	3.96924	B4GAT1	2.89525	FANCM	3.61287	PORCN	3.01744	EML3	3.12115	RNF5P1	3.20919
1812	CELF6	3.96765	STX2	2.89447	RASSF4	3.6084	PCDHB2	3.01717	ZRANB3	3.12107	LINGO3	3.20844
1813	VWA5A	3.96602	TLCD2	2.89363	PDSS1	3.60763	HAGLROS	3.01553	LRRN2	3.12037	PIRT	3.20733
1814	TSPO	3.96205	BCAN	2.89275	ARIH1	3.60729	GOPC	3.01532	CYBA	3.11906	INSM1	3.2069
1815	ASCC3	3.96194	EMP1	2.89223	ECSIT	3.60618	FA2H	3.01423	ZZZ3	3.11778	JMJD1C-AS1	3.20617
1816	TYRO3	3.95929	BCL2L1	2.89209	DZANK1	3.60608	DCAF13	3.01326	RNF5P1	3.11768	NPDC1	3.20215
1817	FIS1	3.95715	ZC3H15	2.89104	CENPBD1P1	3.60528	BRCA1	3.01257	CD58	3.11621	SMIM10L2A	3.20096
1818	CLTCL1	3.95661	UBE3A	2.89064	RAD51D	3.60453	DHX8	3.01157	CTNNBIP1	3.1134	MYLIP	3.2
1819	CMTM4	3.95526	ZNF469	2.89042	SYT7	3.60276	NDUFB9	3.0093	HTR7	3.11305	CPNE3	3.19997
1820	APLNR	3.95482	NUDT4	2.8898	CCDC154	3.6017	ZNF124	3.009	RTN4RL1	3.11192	ZNF826P	3.1924
1821	TSR3	3.95452	CFAP97	2.88846	METTL17	3.60105	TUBA4A	3.0087	GPR27	3.11028	METTL9	3.19225
1822	TSPAN11	3.95341	ATP2C2	2.88774	CNOT6L	3.59914	FHL2	3.00862	PLPPR2	3.10885	LINC01315	3.19144
1823	VSTM2L	3.95332	TMEM9B	2.88364	LOC100240734	3.59906	PCSK6	3.00807	RIC8A	3.10435	JADE2	3.1909
1824	PTRH1	3.95161	PHF20L1	2.88341	KIAA0895	3.59843	PAAF1	3.00758	PLCH1	3.10434	ZNF580	3.19066
1825	HMGCS1	3.95083	HDAC9	2.88226	LOC728024	3.59655	PLCL1	3.00728	EPHX1	3.10425	PCDH15	3.18954
1826	C15orf40	3.94808	P2RY13	2.88022	EPN3	3.59563	ATP6V0E2	3.00527	ZMPSTE24	3.10349	RBX1	3.18953
1827	RIMBP2	3.94785	BRMS1	2.88018	ALOX12P2	3.59498	PIGX	3.00401	SENP5	3.10317	SLC16A5	3.18776
1828	SLC19A1	3.94563	TDRD9	2.87985	RPS6KC1	3.59444	DMXL1	3.00257	RPL18A	3.10235	MHENCR	3.18753
1829	RRAGD	3.94553	USE1	2.87912	NAP1L3	3.59395	COPS9	2.99999	TMEM132A	3.10198	TEX9	3.18741
1830	HIST1H2BI	3.94413	PCNP	2.87883	NELFA	3.59391	CCDC110	2.99918	TRUB1	3.09772	SYNPR	3.18729
1831	P3H2	3.94208	RPL27A	2.87683	ZMYND8	3.59374	DGKE	2.99782	ZNF721	3.09734	PID1	3.18624
1832	THBD	3.94195	KRT86	2.87633	C20orf96	3.59157	ILK	2.99585	SMUG1	3.09709	LINC01547	3.18495
1833	GLG1	3.94182	RPH3AL	2.87614	RABGEF1	3.58972	SPAG7	2.99581	UQCR11	3.09581	RHCG	3.18494
1834	VSTM2B	3.94177	MRPS23	2.87463	FBXO36	3.58885	AMZ2	2.99562	LITAF	3.09527	MOXD1	3.18481
1835	FADS1	3.94115	MESP1	2.87445	BID	3.58876	BLMH	2.99524	CCDC112	3.09424	SNHG19	3.18348
1836	AGAP3	3.94103	CRELD2	2.87346	KDM5C	3.58788	SYT12	2.99476	SASH1	3.09422	AOAH	3.18172
1837	LRRC75A-AS1	3.9398	IFI30	2.87291	UBLCP1	3.58754	FGFR1OP2	2.99421	CENPN	3.09259	ZNF217	3.18165
1838	HSD3B7	3.93966	COX11	2.86703	ABHD3	3.58662	CCDC34	2.99379	ZMAT2	3.09057	KCNG3	3.18064
1839	TP53I3	3.93932	PIRT	2.86611	ABRACL	3.5856	CSRNP2	2.99028	ZFPL1	3.09033	POLE2	3.18019
1840	CDC42SE2	3.93793	ZBTB41	2.86501	MIR4697HG	3.58547	ACSS2	2.98974	PRKD3	3.08951	NENF	3.17989
1841	GPAM	3.93742	NDUFB6	2.86487	MAPK10	3.58528	SHOC2	2.98885	MECR	3.08922	TMEM179B	3.1793
1842	MPEG1	3.93682	C22orf23	2.86445	DUS1L	3.5851	MRPL51	2.98757	MGRN1	3.08628	FAM129B	3.17926
1843	CDKN2D	3.93572	CCT2	2.86442	ZNF714	3.5844	ZNF513	2.98552	STX2	3.08461	CNRIP1	3.17784
1844	LCN12	3.93559	PIGO	2.86396	TRIM14	3.58225	PPP1R17	2.98543	RAB33B	3.08424	GRIK3	3.17635
1845	CPEB2	3.93456	CRB1	2.86277	MTR	3.58206	GON4L	2.98351	TYRO3	3.0806	MAPK8IP1	3.1753
1846	RCN1	3.9339	MGLL	2.86236	ATRX	3.58161	MNAT1	2.98104	IL4R	3.07868	SMIM10L2B	3.17486
1847	DNAL4	3.93219	LINC00958	2.85819	KCTD9	3.58136	PEX5L	2.98097	FOXD1	3.07849	ZZZ3	3.17458
1848	VOPP1	3.93181	HAVCR2	2.85696	BICRAL	3.58119	IGFLR1	2.98055	PTPRZ1	3.07603	COL11A1	3.17447
1849	RGL1	3.93078	RAPGEF1	2.85693	VIPR1	3.58024	SYT15	2.98047	EFL1	3.076	FADS1	3.1724
1850	TAC3	3.92972	CENPVL3	2.85685	IFFO2	3.57878	SMIM13	2.97997	FAM210A	3.07585	SCAPER	3.17186
1851	PLXDC2	3.92961	ASS1	2.85623	CAMSAP3	3.57619	SEMA3B-AS1	2.97977	HCFC1R1	3.07555	VRK1	3.17141
1852	RPL30	3.92908	TMEM70	2.85573	N4BP1	3.57473	LINC00839	2.97968	C20orf27	3.0746	PYCR2	3.17124
1853	GRP	3.92832	GPNMB	2.85535	OXA1L	3.57345	PERP	2.97923	NUDT10	3.07433	CLBA1	3.17082
1854	MECR	3.92569	PRR29	2.85481	ANKRD49	3.57172	CAVIN2	2.97869	TRIM36	3.07358	GABRA3	3.16814
1855	LINGO3	3.92479	GAMT	2.85465	WDR97	3.5701	PIKFYVE	2.97745	CRAT	3.07231	TP53BP1	3.16666
1856	UFD1	3.9215	PTGDS	2.85455	DENND4B	3.56927	EIF4H	2.97433	NICN1	3.07013	PLAC4	3.16543
1857	NFATC1	3.92138	CTGF	2.84897	NEK1	3.56871	RAB3C	2.97401	NMT1	3.07007	LINC01993	3.16256
1858	CINP	3.91967	CDC42EP4	2.8483	FNDC4	3.56677	STRN	2.97226	ENHO	3.06764	NKD2	3.1622
1859	PPCS	3.91836	KCMF1	2.84821	GCC2	3.56632	MAGEF1	2.9716	SMAD9	3.06689	MEGF11	3.16194
1860	DUSP18	3.91695	FNDC11	2.84682	ASAP1-IT1	3.56604	SLC2A1	2.97095	SIDT1	3.06488	ZMAT2	3.16042
1861	KANK1	3.91509	GGNBP2	2.84608	TMEM14C	3.56417	LRIF1	2.97031	LRRC36	3.06473	LOC101927318	3.15845
1862	NPDC1	3.91473	EIF4G1	2.84487	SPECC1L	3.56325	EML1	2.97021	PROCA1	3.06369	BAALC	3.15844
1863	TIMM17B	3.91432	SLC25A22	2.84405	NONO	3.56265	CDK18	2.96973	METTL9	3.06291	ADGRB3	3.15798
1864	SOD1	3.91261	AGMAT	2.84127	MROH5	3.5604	PDE8B	2.96932	MGAT4B	3.06287	FAM129A	3.15732
1865	PCK2	3.91241	RIT2	2.84113	TSPAN1	3.55964	BTN3A3	2.96419	MED8	3.06281	ZNHIT1	3.15725
1866	ATP9A	3.91136	HSD3B7	2.84109	TRRAP	3.55635	MLLT11	2.96379	SNX3	3.06275	DAPL1	3.1562
1867	ALDH7A1	3.91094	CRLF1	2.84005	ARHGEF17	3.55426	IDI1	2.95729	NUP85	3.06228	PLEKHB1	3.1552
1868	ARPC5	3.91049	RPL37A	2.83957	TMEM229B	3.55296	HKR1	2.95692	DHRS2	3.06151	CDC42SE2	3.15381
1869	STIM1	3.91048	ZNF525	2.83521	HYDIN2	3.54936	TCOF1	2.95669	CNGB1	3.06071	CYS1	3.15381
1870	B3GNT2	3.91022	YWHAG	2.83129	EEF1A2	3.54671	INF2	2.95559	SPICE1	3.05872	LOC729683	3.15307
1871	RTL6	3.91018	ADAMTS9	2.83123	ATXN7	3.54442	THAP3	2.95557	TUBA4B	3.05642	DPY19L3	3.15255
1872	SUB1	3.90841	WWC1	2.83076	HIVEP3	3.54411	PSMD2	2.95543	GLRA2	3.05617	FIS1	3.15025
1873	VKORC1L1	3.90823	PALD1	2.83052	KLHL36	3.54359	MRM2	2.95506	MED27	3.05468	TST	3.15016
1874	CACHD1	3.90749	ALKBH7	2.83005	EHD2	3.54309	ZNF493	2.95485	MED10	3.05465	CLEC4G	3.14811
1875	NOL4	3.90727	AGAP3	2.82938	PCDH11X	3.54157	TNK2	2.95318	PSMC1	3.05455	TEKT2	3.14783
1876	ARMCX2	3.90417	CYP4V2	2.82897	GTF3C2	3.54042	METTL22	2.95106	C12orf75	3.05232	CHCHD6	3.14635
1877	FN3KRP	3.90354	CARMIL1	2.8276	LINC00965	3.53867	MAPK12	2.95039	ACTR10	3.05102	HK2	3.14623
1878	DNAJC12	3.90229	SFTA1P	2.82638	BCL7A	3.5385	SNRNP200	2.95034	PTRH1	3.05048	DPH5	3.14535
1879	SUFU	3.90155	C7orf50	2.82617	ASH1L	3.53698	NAP1L5	2.95009	KLHL2	3.04934	FAM184A	3.14351
1880	MORN4	3.90106	VCAN	2.82461	LOC401320	3.53566	EIF4ENIF1	2.94954	PACRG	3.0488	PMP2	3.14256
1881	TMEM59	3.89902	MYOM2	2.82437	ITGB3BP	3.53495	CABP1	2.94949	COLEC12	3.04727	FAM102B	3.1403
1882	SYTL2	3.89887	RAC2	2.82394	ERCC6	3.53486	CERNA1	2.94944	FIGNL2	3.04639	NAV3	3.13936
1883	RFX2	3.89858	GBF1	2.82351	TMCC1	3.53484	GPAA1	2.94933	SELENOK	3.04289	IDNK	3.13923
1884	DYRK2	3.89755	PSD3	2.82252	ANTXR2	3.53326	PSMD7	2.94887	RAB3IP	3.04289	BORCS5	3.13841
1885	SIVA1	3.89748	ALG14	2.82225	NUP205	3.53282	CENPF	2.94712	VSIG4	3.04287	CAPN12	3.13826
1886	JAML	3.89679	APBB1IP	2.8203	HDAC10	3.53235	C1orf123	2.94709	SCYL3	3.04196	CDH9	3.13572
1887	THAP8	3.89635	FAM111A	2.82026	KBTBD12	3.53147	PPP2R1A	2.94699	MAP7D1	3.04189	SMO	3.13501
1888	ABCC6	3.89632	CRAT	2.8199	BZW2	3.52983	INA	2.94621	PSMG3-AS1	3.03987	SH3KBP1	3.13407
1889	NPY1R	3.8956	DARS	2.81958	CNFN	3.52958	TSTA3	2.9448	MSMO1	3.03932	SOX5	3.13158
1890	LRRN1	3.89323	HLA-DMA	2.81952	AP5M1	3.52899	OPN3	2.94377	PLD3	3.03862	ZNF646	3.13141
1891	RPS3A	3.89292	ATP6V0E2	2.8193	PAM	3.52882	ELAC2	2.94217	STON2	3.03665	HMGCL	3.13077
1892	TMEM132A	3.89181	GYG2	2.81826	LDB2	3.52687	SLC32A1	2.93979	ARHGAP42	3.0358	CEP72	3.12621
1893	PSMD4	3.89176	SENP5	2.81738	PBDC1	3.52659	NCKAP1	2.93946	CELF5	3.03531	HNMT	3.12589
1894	PFDN5	3.89171	PDE11A	2.81537	OSGEPL1	3.52568	GABRA1	2.93913	FBXW9	3.03417	ERCC2	3.12561
1895	IGF1	3.89162	SLC22A18	2.81527	ZNF598	3.52471	DDIT3	2.93908	ZDHHC12	3.03182	HECTD2	3.12476
1896	FAM19A1	3.89078	SH3BGR	2.81331	SRXN1	3.52358	GNG11	2.93889	TEX30	3.03113	VIM	3.12464
1897	MIF-AS1	3.89071	BCL2A1	2.81227	RP9	3.52254	KNG1	2.9378	UBXN6	3.03017	ACSS3	3.12324
1898	LOC105373383	3.88952	MRPL40	2.81174	CDKL2	3.52197	PIF1	2.9371	FAS	3.02989	ENC1	3.11972
1899	MYLIP	3.88798	TMEM173	2.81147	PPM1B	3.52159	LINC00294	2.93561	NSA2	3.0297	SPACA3	3.11725
1900	B3GALNT1	3.88734	TUBB4A	2.8101	LEF1	3.52152	FAM86DP	2.93529	CCK	3.02844	CETN2	3.11722
1901	MSMO1	3.88637	FIGNL2	2.80996	STAMBPL1	3.52058	PLPP2	2.93517	RAB22A	3.02777	RSPO4	3.1165
1902	AHR	3.88473	ISYNA1	2.80971	COX7A1	3.52019	MRFAP1	2.93464	MRPS9	3.02742	CNTN3	3.11394
1903	PCBP3	3.88455	TSC22D4	2.80938	LOC100133091	3.5192	PHF20	2.9339	VASH1	3.02715	LHFPL6	3.11255
1904	CPT1C	3.88337	CLPB	2.80725	PCNA	3.51765	DYNC1LI1	2.93333	NOSIP	3.02685	TBCD	3.11229
1905	UBE2D2	3.87698	RESP18	2.80631	SMC1A	3.51574	B4GALT6	2.93286	R3HCC1	3.02591	NPTXR	3.11182
1906	FAM207A	3.87667	SEZ6L	2.80539	RBMS1	3.51516	CHCHD10	2.93256	CD74	3.02407	LINC00467	3.11153
1907	CLEC4G	3.87527	PI16	2.80535	PSMD6	3.51386	FZD10	2.9321	MTSS1	3.02376	C2orf74	3.10932
1908	EML3	3.87086	CHCHD5	2.80384	PCSK1	3.51324	CA14	2.93105	FIBIN	3.02344	MTMR9LP	3.10881
1909	HHEX	3.86879	C2orf80	2.8037	ZNF248	3.51183	ATP5PF	2.93103	P3H2	3.02316	SOX4	3.10645
1910	ACTC1	3.86527	SYNGR2	2.80287	YPEL3	3.50966	GSDME	2.93023	CYTL1	3.02178	LOC101927027	3.1056
1911	SREK1IP1	3.86332	NALT1	2.80263	KAZALD1	3.50943	OR52K2	2.92958	C5orf49	3.02118	NAXE	3.1055
1912	RBX1	3.86246	SNUPN	2.80213	CORO2B	3.50748	SLC31A2	2.92844	FBL	3.01973	FCGBP	3.10472
1913	ARMCX1	3.86234	RPL23A	2.8014	TMEM88	3.50676	CKMT2	2.92844	TRH	3.01871	NOL4	3.10351
1914	TTC23	3.86133	ALKAL2	2.80114	GPR108	3.50671	CCDC82	2.92808	FKBP3	3.01787	ADRA1B	3.10301
1915	MUM1L1	3.86121	STBD1	2.80071	WDR60	3.50666	PDE4A	2.92761	NR2E1	3.01585	CAPZA1	3.10224
1916	FZR1	3.86121	NOP56	2.80033	MICAL2	3.50366	CAMTA2	2.92752	EN2	3.01385	ATP6V0E1	3.10153
1917	BSPRY	3.86003	FXYD1	2.80026	FAM135B	3.50117	TMEM243	2.92643	CNIH2	3.01321	DCAF5	3.10109
1918	ANKLE2	3.85878	LOC105372480	2.79993	USP8	3.50088	POLR1C	2.92483	WDR78	3.01198	SCG3	3.10091
1919	FAM86B3P	3.8586	NARF	2.79923	ATP2B1	3.50055	CDK11A	2.92353	C6orf62	3.01115	ACAT1	3.09612
1920	NSMF	3.85676	BPHL	2.79922	CCDC96	3.49964	REP15	2.92191	THOC7	3.0109	PPP2R3B	3.0956
1921	NRP2	3.85611	SLC35G2	2.79879	SMOC2	3.49924	SERTAD4	2.92028	PRPF6	3.01086	CC2D2B	3.09558
1922	KRT83	3.85478	NUP85	2.79813	PRPF39	3.49903	TUBA1B	2.91684	WDR7	3.00968	ONECUT1	3.09553
1923	MPP2	3.85181	TMED1	2.79804	PTPN12	3.49901	DPP8	2.91651	HMBOX1	3.00893	EPHA10	3.09535
1924	CLBA1	3.8513	ARHGAP23	2.79723	SPTAN1	3.49898	PXK	2.91632	PRKD1	3.00825	RUNDC3A	3.09383
1925	LINC01750	3.84936	SLC6A19	2.79721	GCNA	3.49841	PCDHAC2	2.91518	ORAI1	3.00787	LFNG	3.09359
1926	ACVR2A	3.84806	GOLGA2	2.79524	CEP170	3.498	IGFBP2	2.91431	RASL12	3.00754	ASL	3.09248
1927	TMEM200A	3.84742	GNG3	2.79438	TANGO2	3.49701	SERPINB9	2.91335	TBCD	3.0067	PDS5A	3.09113
1928	CCDC191	3.84571	FGD4	2.79422	NKX1-2	3.49481	WASHC4	2.91083	RYR3	3.00575	TLL1	3.09112
1929	ADGRB3	3.84525	FERMT2	2.79131	ARCN1	3.49312	ZYG11B	2.91069	ATAD3A	3.00573	ARMC10	3.08892
1930	FAR2P2	3.84414	JAKMIP1	2.79117	FAM120B	3.4913	OR4D10	2.90938	BAIAP2	3.00497	TMEM120A	3.08767
1931	FAM47E	3.83912	MTURN	2.78973	ING3	3.49091	ADRA1B	2.90937	LYPD3	3.00287	MYL12B	3.08588
1932	SRSF12	3.83863	SYT10	2.78926	C12orf65	3.49075	CAPS2	2.90868	FBXW4P1	3.00265	TMEM9B	3.08535
1933	CRELD2	3.83664	SLC16A5	2.78861	OXNAD1	3.48969	NANS	2.90804	MRPS14	3.00164	HIST2H2AC	3.08533
1934	TMIGD3	3.83655	UBC	2.78828	TRAPPC11	3.48964	TTF1	2.90794	DUSP18	2.99888	ZFYVE1	3.08504
1935	TAPT1	3.83469	CHTF8	2.788	RGS2	3.4887	XKR9	2.90783	ARL15	2.99854	DDA1	3.08407
1936	LAIR1	3.83443	PPP1R12B	2.7877	CAB39	3.48865	HERC1	2.90715	ZNF217	2.99809	CENPM	3.08368
1937	RCHY1	3.83368	TOB2	2.78498	XBP1	3.48531	STRADA	2.90676	C2orf73	2.99486	FAHD2CP	3.08349
1938	CHODL	3.83262	CAMK1G	2.78425	DNMT3A	3.48496	IRS1	2.9061	CASQ1	2.99437	DPH2	3.08253
1939	TM7SF2	3.83014	HGH1	2.78411	HELQ	3.48383	MLXIPL	2.90606	TTC23	2.99309	GABBR1	3.08221
1940	SSTR2	3.82999	CYTH4	2.78401	ZDHHC17	3.48306	C1orf216	2.90341	PDE4C	2.99241	CRACR2B	3.08198
1941	YWHAZ	3.82911	ARHGAP42	2.78389	GEN1	3.48201	PRR3	2.9018	PPP1CA	2.99169	BEST4	3.07984
1942	TMEM94	3.82751	EGFEM1P	2.7819	SYNJ1	3.48128	EML2	2.90147	ZNF521	2.99143	NPY5R	3.07837
1943	FAM187A	3.82741	TMEM106A	2.78163	ZNF511	3.47935	COQ3	2.90088	SLC16A8	2.99027	CCKBR	3.07731
1944	RABIF	3.82536	LOC728392	2.78117	ELMOD1	3.47752	PDP2	2.90082	CRYBG3	2.98981	FOXJ3	3.07456
1945	NSDHL	3.82497	ZZZ3	2.77907	ATP1A1	3.47691	HSPB8	2.90016	MORN5	2.98865	FAHD2A	3.07262
1946	ARHGAP42	3.82198	RTCA	2.77855	RPL13P5	3.47229	ZDHHC4	2.89975	HIST1H2BI	2.98804	VASN	3.07211
1947	PARD3B	3.82197	RAB34	2.77759	RAI1	3.47219	LNPK	2.89876	WRB	2.98774	NPTX1	3.07061
1948	LOC101928424	3.81729	C6orf62	2.77753	NCK2	3.47045	LOC100507642	2.8978	CRLF3	2.98712	LINGO1	3.07055
1949	ATP6V0E1	3.81647	DNPH1	2.77698	PLAU	3.46896	UBE2M	2.89758	NAA35	2.9864	HPGD	3.06925
1950	OPRK1	3.81574	LCN12	2.77667	SNCAIP	3.46576	SORT1	2.89708	PTCHD1	2.9863	NR2F2-AS1	3.06752
1951	PDHB	3.81377	GPT2	2.77588	DUSP11	3.46231	FABP6	2.89641	C1QTNF3	2.98587	ELF4	3.0674
1952	WDR25	3.81269	DYNLT1	2.77586	SLC25A19	3.46172	ELOVL7	2.89416	TNFAIP8L1	2.98518	NAA35	3.06695
1953	KLF15	3.80749	GAST	2.77497	SEC14L1P1	3.46108	CNOT8	2.89376	MS4A15	2.98425	KLF10	3.06529
1954	FIP1L1	3.80536	ROBO2	2.77443	GEMIN7	3.46074	TRH	2.8935	MAFK	2.98415	MTCH1	3.0652
1955	ERCC2	3.80433	EDN1	2.77375	KCNS2	3.45921	RNF6	2.89333	IMPACT	2.98312	COX6A2	3.06342
1956	TIMP3	3.80338	KCNF1	2.77373	SLC45A4	3.45891	UQCR10	2.89241	SOD1	2.98243	DNLZ	3.06136
1957	FBXO2	3.80218	MAPK12	2.77283	PRKAA1	3.45521	ROPN1L	2.89179	SLC16A5	2.98125	SMAD2	3.05944
1958	CFAP97	3.80211	MIGA1	2.77058	TTC33	3.45414	SMIM6	2.89134	TIMM17B	2.98076	CRLF3	3.05764
1959	HLA-DPA1	3.80024	STYXL1	2.77023	BSCL2	3.45407	TMEM230	2.89012	RAB3C	2.98014	FKBP14	3.05436
1960	NOP56	3.79804	MYORG	2.77023	SEPT7P2	3.4524	MRPL16	2.89007	RASGRF2	2.97965	JMJD4	3.05059
1961	DHDH	3.79523	JAML	2.76731	INPP5E	3.45205	LYPD5	2.88954	NETO2	2.97661	ABCB6	3.04748
1962	CFAP52	3.79347	LIMS1	2.76697	RABL6	3.45057	PCGF1	2.88928	MAPKAPK3	2.974	AGTPBP1	3.04739
1963	FREM3	3.79247	CCDC28A	2.76695	KCNH1	3.45053	TRABD2A	2.88852	TUBA1B	2.97336	HIST1H3C	3.04671
1964	ARL8A	3.79183	TACO1	2.76444	TBC1D8	3.44955	NEK11	2.88848	H3F3C	2.97285	ZCCHC18	3.04492
1965	SEC22C	3.79176	RCN2	2.76405	RTN2	3.4495	ADAM22	2.88845	PQBP1	2.97277	NABP1	3.04472
1966	CIDEB	3.79104	LONP2	2.76355	PRSS56	3.44803	DENND5A	2.88602	KLF10	2.97185	HTRA1	3.04259
1967	INTU	3.79098	NCAM2	2.76353	MAATS1	3.44714	LHPP	2.8858	LOC101927027	2.97157	DMAC1	3.04256
1968	ZFHX4-AS1	3.78912	ALDH4A1	2.76168	ZFY	3.44643	CLSTN1	2.88159	FABP5	2.97058	KRT86	3.04245
1969	HRK	3.78889	TMEM141	2.75852	ESRRB	3.44605	CCDC30	2.88157	FGD4	2.96976	ETFRF1	3.04227
1970	RPL18A	3.78831	PET100	2.75778	NCDN	3.44488	AK1	2.88087	HPGD	2.96974	TOM1	3.04137
1971	PUM1	3.78779	YWHAH	2.75769	WDR75	3.4442	UBE3A	2.8802	KYNU	2.96958	DGKB	3.0402
1972	PLCG2	3.78765	ZNF217	2.75768	PDP2	3.44405	LDB3	2.88004	LINC02550	2.96864	KLC1	3.03938
1973	CD24	3.78732	NUDT16	2.75732	ZNF335	3.44302	MRPS24	2.87749	FLJ20021	2.96593	SNTB1	3.03896
1974	MESD	3.7849	LOC145783	2.75675	CCNE1	3.44243	CCNYL1	2.87712	NAA10	2.9645	LAPTM4A	3.03857
1975	RAMP1	3.78475	SLC25A23	2.75654	TMEM109	3.44091	UBB	2.87611	STRADB	2.96436	NR4A3	3.03598
1976	BAALC	3.78336	ACP1	2.7556	PIDD1	3.44065	SAMD13	2.87463	SLC29A4	2.96346	MIEF1	3.03541
1977	NDUFB1	3.78205	NR2E1	2.75363	ZNF491	3.44003	NR3C1	2.87439	SSTR2	2.96181	TMEM59	3.03504
1978	PLEKHG4B	3.77702	AIFM2	2.75331	CFH	3.43904	NOP16	2.87401	CCDC86	2.95987	KLHL5	3.03402
1979	FBLN2	3.77505	NPDC1	2.75276	RIPPLY2	3.43789	CARD14	2.87337	ITGA8	2.95857	UFD1	3.03393
1980	SEC61A2	3.77482	DDX10	2.7523	HNRNPL	3.43576	CLDND1	2.87295	WWC1	2.95819	GRP	3.03152
1981	TRAF3IP2	3.77473	MRPL14	2.75209	GRIP1	3.43572	CPEB1	2.87181	LRSAM1	2.95713	CCDC71L	3.03101
1982	SYT9	3.77466	OCA2	2.7518	GPR158	3.43438	IFIT1	2.87091	ALDH7A1	2.9564	ZFP36	3.03006
1983	TNS3	3.77353	DNALI1	2.7517	C2CD5	3.43348	NUDT8	2.86973	PLXNA3	2.95538	TNFRSF11A	3.0287
1984	DOCK7	3.77137	STK10	2.75122	FNDC10	3.43132	GREB1	2.86938	TMEM179B	2.9552	SEC22C	3.02759
1985	KIF26B	3.77092	RPS19	2.75038	SFXN1	3.43026	PCMT1	2.86891	LRRN1	2.95413	PDGFB	3.02472
1986	NEDD4L	3.77027	GAREM1	2.74888	REEP6	3.43006	TRIM26	2.86865	SLC1A3	2.95346	SLC8A2	3.02415
1987	PTPRR	3.76957	C19orf38	2.74823	KCNIP2	3.42434	LAMTOR5	2.86857	MRPL44	2.95271	CPT1C	3.02227
1988	ACVR2B	3.76897	FAM177A1	2.74799	SERPING1	3.42355	CHD1L	2.86707	ADAMTS9	2.95177	ERMARD	3.02134
1989	ATP6V0A4	3.76772	ZCWPW1	2.74568	FUT11	3.42309	PACS2	2.8667	TNNI3	2.95156	GNAI2	3.02133
1990	CYHR1	3.76643	ARSF	2.74474	KDM1A	3.4229	HRH3	2.86619	RPLP0	2.95021	HLA-DRB1	3.02023
1991	RNF11	3.76352	GALNT14	2.74472	SMG9	3.42243	LRRC41	2.86572	FSTL5	2.95007	HTR3B	3.01956
1992	WDR48	3.76279	CASQ1	2.74454	LINGO2	3.42193	TSPAN31	2.86479	SAP30	2.94863	RUBCN	3.01709
1993	RGS22	3.76262	DUSP28	2.74328	SLC24A5	3.42154	RHOT2	2.86394	BOP1	2.94807	LCN12	3.0167
1994	GRIK2	3.75632	PTGER4	2.74312	POLR3G	3.41959	DAGLA	2.8639	TMEM186	2.947	SAMD15	3.01566
1995	SELENON	3.75619	FMO2	2.74254	WDSUB1	3.41859	MTFP1	2.86387	GPR68	2.94474	CCDC85C	3.01526
1996	CDH10	3.75602	EPHX1	2.74166	HSPB6	3.41739	ITPA	2.86348	DAPL1	2.94432	CACNG4	3.0152
1997	TSPAN33	3.7555	UNC5B	2.74161	SUMF2	3.41602	AADAT	2.86317	DZIP3	2.94259	PTRH1	3.01486
1998	NENF	3.75509	HSPA13	2.74083	SRRM4	3.4143	AK9	2.86213	STK39	2.94233	C6orf62	3.01472
[truncated: 10,669 more rows]

## Sheet: FGSEA_disorders
FDR-corrected p-value
	GABA	Glutamate	Serotonin	Epinephrine	Dopamine	Aspartate	Norepinephrine	Glycine	Histamine	Acetylcholine
OCD	0.959715	0.283831	0.221536	0.117832	0.288351	0.621417	0.232917	0.823239	1	0.894264
MDD	0.195396	0.131238	0.0110476	0.178809	0.063496	0.170576	0.18809	0.661862	0.0145952	0.0643929
BD	0.987117	0.742356	0.950215	0.156069	0.832555	0.799053	0.817948	1	0.774793	1
SCZ	0.855225	0.347561	0.225684	0.106281	0.103418	0.887246	0.483536	0.899179	0.889715	0.769871
ADHD	0.166113	0.136654	0.18566	0.787642	0.151385	0.126007	0.163619	0.435266	0.0945641	0.136805
ASD	0.126186	0.495748	0.166003	0.577282	0.207322	1	0.114163	0.853116	0.20641	0.207504
Normalised Enrichment Score (NES)
OCD	0.74816	1.25442	1.57883	1.56937	1.29299	1.01825	1.39562	-0.76506	0.79331	0.71138
MDD	1.23462	1.42973	1.87405	1.27884	1.62088	1.34727	1.2964	0.86795	1.88588	1.56635
BD	0.52978	1.25689	0.95226	1.62218	1.13514	0.9487	0.88084	0.71162	-0.79668	0.98801
SCZ	0.80253	1.27372	1.39946	1.66684	1.58336	0.84725	1.15062	0.68998	-0.69475	0.95917
ADHD	1.4049	1.35347	1.26274	0.78578	1.53732	1.38792	1.46601	-1.01137	1.64496	1.40053
ASD	1.47453	1.00861	1.33447	0.91971	1.25306	-0.76984	1.54866	-0.73724	1.5596	1.33543

## Sheet: FGSEA_MEG
FDR-corrected p-value
	GABA	Glutamate	Serotonin	Epinephrine	Dopamine	Aspartate	Norepinephrine	Glycine	Histamine	Acetylcholine
Delta	0.2759	0.28356	0.17448	0.47082	0.20422	0.1541	0.22764	0.14319	0.05807	0.29985
Theta	0.17981	0.48249	0.14946	0.94956	0.07397	0.12771	0.5996	0.70909	0.12429	0.15592
Alpha	0.1575	0.14061	0.14332	0.38933	0.12945	0.13241	0.13091	0.1753	0.04451	0.15452
Beta	0.55638	0.66715	1	0.76146	0.69477	0.41358	0.94185	0.69942	0.76777	0.58447
Low gamma	0.27282	0.35388	0.38481	0.30277	0.28739	0.34483	0.45722	0.27593	0.00759	0.32906
High gama	0.43977	0.66077	0.25086	0.43955	0.24359	0.25428	0.29303	0.15363	0.01071	0.23769
Normalised Enrichment Score (NES)
Delta	1.15451	1.182	1.39542	0.976873	1.28494	1.38066	1.40159	-1.28573	1.77674	1.4288
Theta	1.32001	1.05716	1.46691	-0.642732	1.70798	1.40525	0.948702	0.83781	1.55972	1.40944
Alpha	-1.46583	-1.36354	-1.33888	-1.04212	-1.33195	-1.44538	-1.41248	1.23791	-1.76899	-1.53815
Beta	1.14154	1.33707	-0.80332	-1.04156	0.993447	1.29927	-1.16611	0.91373	-0.802215	0.912224
Low gamma	1.1963	1.06528	1.25159	1.20999	1.15283	1.22264	1.35046	-1.13923	1.95984	1.3279
High gama	1.03976	0.865518	1.28889	1.36365	1.22082	1.33117	1.36321	-1.2724	1.96685	1.26377

[truncated: 1 more sheets: MAGMA]
